# Supplementary material for: Spore Germination of the Obligate Biotroph Spongospora subterranea: Transcriptome Analysis Reveals Germination Associated Genes
Source: Front Microbiol. 2021 Jun 16;12:691877. doi: 10.3389/fmicb.2021.691877 (PMC8256667; doi:10.3389/fmicb.2021.691877)
Supplement: Supplementary file 1 [file Table_1.XLSX]

## Sheet: Primers
Transcript ID	Primer Name	Primer sequence (5' 3')
TCONS_00004155	T155 F	AGCCTCGTAAATTGCTCGAA
	T155 R	TCACGTTGAGCGAAAACAAC
TCONS_00009357	T357 F	TAGCATCAGGTTGCTGTTCG
	T357 R	TCAGGACGGTTCGTCTTTCT
TCONS_00005155	Prot F	CGAGCACCCTTAAACAGGAG
	Prot R	GGATGATAGGCTCTGCTTGC
TCONS_00003873	T873 F	TCTGATTATACCCGCCCATT
	T873 R	TTACCCGTTCAAACCAGGTC
TCONS_00001720	T720 F	CGTCCTTGCTGTGTTGGTAA
	T720 R	ATTGTGGCCTCTCGTAATCG
TCONS_00012806	T806 F	GTGGCTCGAGGATCAGAGTC
	T806 R	CGGACTGGCTTGTTTCTCTC
TCONS_00013714	T714 F	TAACCTGCGTCACATTCAGC
	T714 R	CAGTCTCGCGTTATCGTCAA
TCONS_00008033	T033 F	CCCGTTCACGATTACGAAGT
	T033 R	AAATTGTCGGCCTCTTCCTT
TCONS_00009164	T164 F	TTGGGGATCGTGTAGGTCTT
	T164 R	ACTAAGAAGCGTCGCAATGG
TCONS_00003309	T309 F	AACTCGGTCATGGCAAAATC
	T309 R	GGCCACGCTAAGAATACCAA
Internal contol
Pseudoaltemoranas prydzensis	16S rRNA F	TCGGAATTACTGGGCGTAAAG
	16S rRNA R	GAGTGTGATAGAGGGTGGTAGA
