# Supplementary material for: Spore Germination of the Obligate Biotroph Spongospora subterranea: Transcriptome Analysis Reveals Germination Associated Genes
Source: Front Microbiol. 2021 Jun 16;12:691877. doi: 10.3389/fmicb.2021.691877 (PMC8256667; doi:10.3389/fmicb.2021.691877)
Supplement: Supplementary file 2 [file Table_2.XLSX]

## Sheet: Total Unigenes
GeneID	Base mean	log2(FC)	StdErr	Wald-Stats	P-value	P-adj
TCONS_00013973	4.1546e+06	-0.280397	0.0692777	-4.04744	5.17812e-05	0.00117371
TCONS_00009401	1.56129e+06	-0.371672	0.0475087	-7.82323	5.1483e-15	5.12064e-13
TCONS_00007641	885957	-0.224603	0.0545486	-4.1175	3.83011e-05	0.000911566
TCONS_00004285	824837	-0.0205877	0.060746	-0.338915	0.734674	0.901467
TCONS_00003712	758892	0.0415754	0.0529016	0.7859	0.431926	0.728882
TCONS_00009668	727143	0.0693033	0.056594	1.22457	0.220738	0.53942
TCONS_00012303	599392	-0.120963	0.0468582	-2.58147	0.00983803	0.0798546
TCONS_00011666	595980	0.067166	0.0590813	1.13684	0.255605	0.572748
TCONS_00008277	543367	-0.0385002	0.0552975	-0.696236	0.486281	0.768249
TCONS_00010336	540257	-0.244443	0.0466913	-5.23529	1.64722e-07	6.77597e-06
TCONS_00013141	528853	-0.250961	0.049782	-5.0412	4.62623e-07	1.73198e-05
TCONS_00009270	528167	-0.00770976	0.124259	-0.0620459	0.950526	0.980695
TCONS_00011228	523612	-0.0064602	0.0651766	-0.0991185	0.921044	0.973333
TCONS_00008676	464739	0.147194	0.0533395	2.75957	0.00578781	0.0546523
TCONS_00008377	398261	-0.125284	0.0478647	-2.61746	0.00885873	0.0740606
TCONS_00003365	374269	-0.150831	0.0501097	-3.01002	0.00261233	0.0300148
TCONS_00002589	328613	-0.0917738	0.0512546	-1.79055	0.0733657	0.295744
TCONS_00001636	313943	-0.181461	0.0464437	-3.90712	9.34031e-05	0.00193071
TCONS_00003681	300383	-0.18316	0.0470705	-3.89118	9.97585e-05	0.00202573
TCONS_00010289	295917	-0.0470625	0.0484496	-0.971369	0.331365	0.648285
TCONS_00000669	273898	-0.0354365	0.0455097	-0.778658	0.436181	0.731925
TCONS_00006095	257628	-0.0116638	0.0612369	-0.19047	0.84894	0.949352
TCONS_00005460	244641	-0.123491	0.0643933	-1.91776	0.0551417	0.249298
TCONS_00013853	233635	-0.275309	0.0536324	-5.13327	2.84758e-07	1.10327e-05
TCONS_00010947	215702	0.0318251	0.0564616	0.56366	0.572986	0.814349
TCONS_00005451	203097	-0.0812871	0.0634421	-1.28128	0.200095	0.513848
TCONS_00000060	190593	0.0538925	0.0517427	1.04155	0.297622	0.618342
TCONS_00005402	168662	-0.0465387	0.0591031	-0.787417	0.431038	0.728675
TCONS_00009056	152924	0.121979	0.0634339	1.92293	0.0544889	0.248029
TCONS_00000624	152300	-0.126151	0.0505581	-2.49517	0.0125897	0.0944795
TCONS_00005995	148896	0.0740848	0.0547717	1.35261	0.17618	0.482757
TCONS_00010505	146399	-0.132733	0.0478428	-2.77436	0.00553111	0.0530418
TCONS_00009975	142609	0.157889	0.0476915	3.31064	0.000930825	0.0129499
TCONS_00002445	140904	-0.0575477	0.0461468	-1.24706	0.212377	0.531061
TCONS_00000830	140090	-0.119226	0.0560588	-2.1268	0.0334368	0.182193
TCONS_00012534	126371	-0.036754	0.0459106	-0.800557	0.423388	0.722938
TCONS_00006352	124879	0.0299019	0.0497914	0.600543	0.548144	0.801625
TCONS_00013687	124503	-0.221272	0.0554258	-3.99222	6.54571e-05	0.00141625
TCONS_00003670	119348	-0.125807	0.04818	-2.61119	0.00902272	0.0745073
TCONS_00011858	110202	-0.101217	0.0581901	-1.73942	0.0819617	0.313004
TCONS_00012512	105457	-0.0810745	0.0808722	-1.0025	0.316101	0.634859
TCONS_00012614	103373	-0.0521728	0.0571052	-0.913627	0.360913	0.672634
TCONS_00008588	102063	-0.0175663	0.0536505	-0.327421	0.743349	0.905182
TCONS_00006572	98462.8	-0.305757	0.0498768	-6.13025	8.77411e-10	5.31551e-08
TCONS_00011399	97896.9	-0.172267	0.0479607	-3.59183	0.000328361	0.00559642
TCONS_00007349	97795.9	-0.2159	0.0487111	-4.43226	9.32518e-06	0.000263318
TCONS_00011903	97546.5	-0.222953	0.0499875	-4.46017	8.18961e-06	0.000240896
TCONS_00003789	96860.2	0.0882119	0.0513587	1.71756	0.0858763	0.321867
TCONS_00009927	96052.4	0.0434488	0.0483224	0.899144	0.368576	0.678204
TCONS_00005192	94905	0.0306593	0.046895	0.653787	0.513249	0.784293
TCONS_00010064	91770.3	-0.171395	0.0498418	-3.43878	0.000584339	0.00887023
TCONS_00002457	87627.2	0.0140255	0.0525967	0.266662	0.78973	0.92371
TCONS_00008585	86286.5	-0.0146458	0.0551446	-0.26559	0.790555	0.92371
TCONS_00001623	85034.8	-0.0637262	0.0501898	-1.2697	0.20419	0.519756
TCONS_00008767	83889.4	0.0834099	0.060785	1.37221	0.169997	0.472814
TCONS_00011682	82425.5	-0.00442603	0.0693614	-0.0638111	0.949121	0.980307
TCONS_00009495	81068.1	0.0659647	0.0472471	1.39616	0.162665	0.459682
TCONS_00002913	79765.3	-0.163725	0.0471753	-3.47057	0.000519353	0.00808637
TCONS_00003907	75270.8	-0.283184	0.0470837	-6.01447	1.80478e-09	1.04583e-07
TCONS_00001503	73935.3	0.056049	0.0484485	1.15688	0.247322	0.565793
TCONS_00000061	72817.3	-0.0149979	0.0761112	-0.197052	0.843787	0.946792
TCONS_00006754	70966.6	0.107719	0.0471636	2.28395	0.0223744	0.13985
TCONS_00008353	70124.8	-0.099709	0.0477912	-2.08635	0.0369472	0.193615
TCONS_00003534	70063.3	0.130562	0.0499445	2.61414	0.00894513	0.0741824
TCONS_00001459	67349.5	0.032732	0.0485271	0.674509	0.499988	0.774145
TCONS_00010200	66607.8	-0.0636563	0.0507152	-1.25517	0.209416	0.527495
TCONS_00005111	66153.6	-0.00555006	0.0503021	-0.110335	0.912144	0.971787
TCONS_00006246	65752.7	-0.0107103	0.0469577	-0.228085	0.81958	0.936705
TCONS_00010698	64179.5	-0.0635002	0.0466057	-1.3625	0.173041	0.478087
TCONS_00012929	63505.9	0.018877	0.0683983	0.275986	0.782559	0.92037
TCONS_00012932	62866.6	0.0179463	0.0691355	0.259582	0.795187	0.925449
TCONS_00000131	62633.6	-0.469576	0.049586	-9.46992	2.80054e-21	4.24155e-19
TCONS_00001842	62288.5	0.0656251	0.0483989	1.35592	0.175124	0.481051
TCONS_00010197	60786.4	-0.0619127	0.0507476	-1.22001	0.22246	0.540852
TCONS_00009660	60693.7	-0.0909022	0.0496879	-1.82946	0.0673304	0.283443
TCONS_00001436	59965.3	-0.00658822	0.0482441	-0.13656	0.891379	0.964153
TCONS_00000223	59466.4	-0.0380887	0.0506895	-0.751411	0.452406	0.744374
TCONS_00011972	58767.2	-0.213893	0.0701052	-3.05103	0.00228058	0.0269464
TCONS_00010525	57891.4	0.0477052	0.0487873	0.97782	0.328163	0.645255
TCONS_00002459	57456.1	-0.0180456	0.0563977	-0.319971	0.748991	0.907834
TCONS_00001819	57321.9	0.0682274	0.047236	1.44439	0.148629	0.436591
TCONS_00009326	56939.9	-0.181168	0.058183	-3.11376	0.00184722	0.0227961
TCONS_00003260	56386.2	-0.116797	0.0500705	-2.33265	0.0196667	0.127892
TCONS_00004271	56085.9	-0.0184712	0.0479553	-0.385176	0.700107	0.883858
TCONS_00014395	55522.8	-0.126574	0.0659865	-1.91818	0.0550885	0.249242
TCONS_00007812	55327.1	0.088325	0.0527244	1.67522	0.0938913	0.338322
TCONS_00004438	55089.4	-0.170157	0.0466089	-3.65074	0.00026149	0.0047216
TCONS_00007466	54530.7	-0.0436843	0.0482399	-0.905564	0.365167	0.676904
TCONS_00009976	54162.7	-0.358908	0.0568381	-6.31457	2.70913e-10	1.73593e-08
TCONS_00012943	52699.5	-0.0716704	0.0511561	-1.40102	0.16121	0.457008
TCONS_00004209	52698.1	-0.0427083	0.0571684	-0.747061	0.455027	0.74632
TCONS_00010266	51784.9	-0.208387	0.0470124	-4.4326	9.31019e-06	0.000263318
TCONS_00002042	51771.8	0.2533	0.0493348	5.13431	2.83174e-07	1.10327e-05
TCONS_00013758	51051.8	-0.198221	0.0484202	-4.09377	4.24418e-05	0.000992393
TCONS_00005012	50775.3	-0.148177	0.0510049	-2.90516	0.00367063	0.0394533
TCONS_00003912	50756.8	0.00492504	0.0473523	0.104009	0.917163	0.973189
TCONS_00008975	50702.6	-0.246392	0.0482258	-5.10913	3.23647e-07	1.23245e-05
TCONS_00000865	50059.2	-0.17017	0.0575756	-2.9556	0.00312063	0.0348339
TCONS_00004839	49239.4	-0.0344313	0.0636847	-0.540652	0.588747	0.821844
TCONS_00009152	48862.7	-0.4242	0.0788157	-5.38218	7.35908e-08	3.21155e-06
TCONS_00012122	48507.5	0.0475506	0.0598647	0.794301	0.42702	0.725251
TCONS_00000885	48250.6	-0.182556	0.0558626	-3.26795	0.0010833	0.0146826
TCONS_00013952	46293.2	-0.294065	0.0604044	-4.86826	1.12584e-06	3.92807e-05
TCONS_00009377	46167.1	-0.197857	0.0592385	-3.34	0.000837791	0.0118536
TCONS_00001196	45711.8	-0.130429	0.0506824	-2.57346	0.0100689	0.0810374
TCONS_00008453	45198.7	-0.0939245	0.0732997	-1.28138	0.200061	0.513848
TCONS_00003423	45111.5	0.0304314	0.0478316	0.636219	0.524634	0.79078
TCONS_00003115	45070.2	-0.208235	0.0476325	-4.3717	1.23284e-05	0.000331277
TCONS_00006753	45032.5	0.476904	0.0576531	8.27196	1.31775e-16	1.46358e-14
TCONS_00007809	44961.8	0.0711029	0.0807476	0.880558	0.378557	0.688255
TCONS_00009840	44539.8	-0.084411	0.0503181	-1.67755	0.0934359	0.338216
TCONS_00013129	44435.2	-0.0715268	0.0485908	-1.47202	0.141014	0.42567
TCONS_00005776	44031.9	-0.00812641	0.0482832	-0.168307	0.866342	0.953067
TCONS_00008763	43723.4	0.0363423	0.0604682	0.601015	0.54783	0.801625
TCONS_00004563	43720.9	-0.0888573	0.0529152	-1.67924	0.0931054	0.33757
TCONS_00003544	43677.6	-0.0373891	0.0525218	-0.711878	0.47654	0.762574
TCONS_00005869	43370.3	0.169912	0.0609006	2.78999	0.00527096	0.0512784
TCONS_00006042	43002.9	-0.0594303	0.0578148	-1.02794	0.303977	0.62387
TCONS_00008315	42880.9	0.0846276	0.0593514	1.42587	0.153905	0.444021
TCONS_00001633	42502.8	0.0814814	0.057293	1.42219	0.154972	0.445144
TCONS_00009488	42149.6	-0.013086	0.0565885	-0.231248	0.817122	0.936229
TCONS_00008796	42110	0.0531849	0.0769156	0.691471	0.48927	0.769044
TCONS_00000702	42055.1	0.082312	0.0475901	1.7296	0.0837013	0.317104
TCONS_00004170	41539.5	-0.125359	0.120263	-1.04238	0.297237	0.618342
TCONS_00004432	41266.6	0.00251108	0.0492966	0.0509382	0.959375	0.985096
TCONS_00009517	41157.2	-0.164029	0.0554023	-2.9607	0.00306942	0.0343775
TCONS_00003282	40736.8	-0.0794816	0.0492504	-1.61383	0.106565	0.364513
TCONS_00010504	40608.1	-0.0873433	0.0525092	-1.66339	0.0962343	0.342214
TCONS_00009577	39743.8	-0.0546891	0.0494283	-1.10643	0.268539	0.585968
TCONS_00011969	39345.4	0.122243	0.0477746	2.55873	0.0105054	0.0833226
TCONS_00013580	39110.8	-0.103609	0.0506556	-2.04536	0.0408195	0.207175
TCONS_00007206	37549.7	-0.252623	0.0521517	-4.844	1.27248e-06	4.41656e-05
TCONS_00006698	37168.4	-0.165342	0.0486028	-3.4019	0.000669181	0.00990983
TCONS_00000513	37102.6	0.0802726	0.0530543	1.51303	0.130272	0.409023
TCONS_00009677	36754.8	0.0309571	0.0484705	0.638679	0.523032	0.789687
TCONS_00010205	36735.1	-0.173394	0.0473332	-3.66325	0.000249033	0.00453431
TCONS_00009457	36519.9	-0.0450616	0.0755259	-0.596637	0.55075	0.802579
TCONS_00012058	36386.3	-0.0678664	0.0608423	-1.11545	0.264659	0.583247
TCONS_00008895	36299.2	-0.197224	0.0472501	-4.17405	2.99226e-05	0.000725106
TCONS_00002944	36259.7	-0.02656	0.0466016	-0.569938	0.56872	0.813061
TCONS_00001725	35956.2	-0.0433621	0.0591172	-0.733494	0.463257	0.752701
TCONS_00009626	35830.5	0.102517	0.0588509	1.74199	0.0815107	0.31234
TCONS_00007807	35613.5	0.095552	0.0645361	1.4806	0.138714	0.422674
TCONS_00012569	35561.5	-0.0738355	0.0513358	-1.43829	0.150353	0.439277
TCONS_00007497	35524.8	0.29785	0.0523623	5.68825	1.28351e-08	6.43108e-07
TCONS_00008489	35323.8	-0.0297713	0.076292	-0.390228	0.696368	0.882104
TCONS_00001690	35270.9	0.0519863	0.0669349	0.77667	0.437353	0.732292
TCONS_00009841	35221.6	-0.00642408	0.0549408	-0.116927	0.906918	0.968896
TCONS_00002214	34805	0.0324314	0.0477592	0.67906	0.4971	0.772725
TCONS_00011522	34217.5	0.00117017	0.0463767	0.0252317	0.97987	0.992228
TCONS_00011449	33939.2	0.101549	0.0489814	2.07322	0.0381519	0.197423
TCONS_00001200	33842.4	-0.0772635	0.0522737	-1.47806	0.139393	0.423462
TCONS_00002902	33708.4	-0.0762274	0.0554387	-1.37498	0.169136	0.47175
TCONS_00001570	33299.5	-0.160108	0.0576477	-2.77735	0.00548038	0.0527002
TCONS_00010853	33055.3	-0.127258	0.0519833	-2.44806	0.0143628	0.10314
TCONS_00004946	33015.8	-0.1313	0.0552662	-2.37577	0.0175126	0.118481
TCONS_00002083	32691.6	-0.0494501	0.05074	-0.974578	0.32977	0.646821
TCONS_00006262	32624.1	-0.244173	0.0493815	-4.94464	7.62849e-07	2.71852e-05
TCONS_00001640	32371.8	-0.118939	0.0477379	-2.49149	0.0127209	0.095319
TCONS_00010954	32329.3	0.069803	0.0616144	1.1329	0.257256	0.575763
TCONS_00011451	32192.9	0.102133	0.0491396	2.07842	0.0376707	0.195817
TCONS_00013586	32159.6	0.0673619	0.0626354	1.07546	0.282169	0.602233
TCONS_00009599	31982.3	-0.00298806	0.0485907	-0.0614946	0.950965	0.980843
TCONS_00000787	31805.1	-0.0627434	0.0515292	-1.21763	0.223366	0.541276
TCONS_00001101	31705	-0.0714207	0.0730623	-0.977531	0.328306	0.645255
TCONS_00006977	31583.6	-0.193663	0.0545003	-3.55342	0.000380256	0.00631926
TCONS_00012119	31306.6	-0.127104	0.049487	-2.56843	0.010216	0.0818259
TCONS_00012398	31210.5	0.144878	0.047114	3.07505	0.00210464	0.0252709
TCONS_00002451	31202.2	0.0476664	0.067499	0.706178	0.480077	0.764042
TCONS_00003719	31112.2	0.105037	0.0608677	1.72566	0.0844081	0.319056
TCONS_00011607	30903.5	0.00831891	0.0485697	0.171278	0.864005	0.953067
TCONS_00003586	30723.3	-0.0155155	0.0539108	-0.2878	0.7735	0.918662
TCONS_00012197	30389.8	-0.179981	0.049836	-3.61146	0.000304474	0.00524722
TCONS_00005705	30371	-0.0397579	0.0490998	-0.809735	0.418092	0.719268
TCONS_00003962	30329.1	0.110206	0.0657919	1.67506	0.093922	0.338322
TCONS_00002280	30303.3	0.0797108	0.0466418	1.709	0.0874513	0.325573
TCONS_00010682	30296.7	0.00113504	0.0475797	0.0238555	0.980968	0.992263
TCONS_00000736	30294.8	-0.0553837	0.0497496	-1.11325	0.265602	0.584148
TCONS_00001308	30187.6	0.041297	0.0551133	0.749311	0.45367	0.745386
TCONS_00005709	30019.7	0.00428934	0.0609899	0.0703288	0.943932	0.979197
TCONS_00010464	29731.7	0.134556	0.0573608	2.34578	0.0189875	0.12528
TCONS_00013243	29713.6	0.113623	0.0528575	2.1496	0.0315866	0.175046
TCONS_00008754	29632.9	0.0744166	0.0775811	0.959211	0.337453	0.65412
TCONS_00010121	29612.7	0.0857008	0.059673	1.43618	0.150952	0.43993
TCONS_00008121	29519	0.0698379	0.0489403	1.427	0.15358	0.443944
TCONS_00005399	29473.5	-0.0902744	0.0516802	-1.74679	0.0806739	0.311298
TCONS_00000921	29242.2	0.00832706	0.0699078	0.119115	0.905184	0.968896
TCONS_00011517	28993.8	0.0649108	0.0474061	1.36925	0.170921	0.474196
TCONS_00002494	28902	-0.165838	0.0492575	-3.36676	0.000760565	0.0109233
TCONS_00005150	28705.1	0.190342	0.0542436	3.50902	0.000449754	0.00727466
TCONS_00009716	28701.3	-0.213529	0.0548837	-3.89057	0.00010001	0.00202573
TCONS_00010321	28573.4	-0.0269283	0.0619505	-0.434675	0.663798	0.863132
TCONS_00003430	28236.7	-0.0988502	0.0592552	-1.66821	0.0952739	0.340797
TCONS_00003209	28158.7	0.0179172	0.0562217	0.318688	0.749963	0.908517
TCONS_00001731	27775.1	-0.052906	0.0527916	-1.00217	0.316263	0.634859
TCONS_00011430	27700.4	-0.117718	0.0542779	-2.16881	0.0300975	0.1694
TCONS_00013913	27315.1	0.2073	0.0642968	3.22412	0.00126362	0.0168079
TCONS_00011377	27192.7	0.245097	0.0532617	4.60176	4.18933e-06	0.000130457
TCONS_00006525	27041.1	0.118909	0.061068	1.94716	0.0515151	0.241154
TCONS_00009053	27038.7	0.122173	0.0512162	2.38543	0.017059	0.116357
TCONS_00005883	26996.2	0.0491635	0.0498742	0.98575	0.324256	0.642534
TCONS_00003906	26498.4	-0.0981454	0.0563822	-1.74072	0.0817332	0.312729
TCONS_00000520	26357.9	-0.00911986	0.0613086	-0.148753	0.881748	0.959499
TCONS_00000085	26208.5	0.0749565	0.0650592	1.15213	0.249269	0.567519
TCONS_00008831	26100	0.143315	0.0587912	2.43769	0.0147813	0.104901
TCONS_00004468	25896.4	-0.00685401	0.067466	-0.101592	0.91908	0.973333
TCONS_00002535	25805.2	-0.144786	0.0573363	-2.52521	0.0115631	0.0884851
TCONS_00001710	25724	-0.122752	0.0535531	-2.29215	0.0218968	0.138444
TCONS_00004921	25716.5	0.0031212	0.0470236	0.0663752	0.947079	0.979565
TCONS_00007160	25668.4	-0.0161715	0.0738577	-0.218955	0.826685	0.940235
TCONS_00003220	25610.8	-0.0513021	0.0540445	-0.949256	0.342491	0.659641
TCONS_00009633	25469.5	-0.136268	0.0563442	-2.4185	0.0155846	0.108409
TCONS_00007686	25444.5	-0.099659	0.0484564	-2.05668	0.0397174	0.202973
TCONS_00006253	25418.5	-0.311499	0.0499392	-6.23757	4.44413e-10	2.74219e-08
TCONS_00006155	25277.7	-0.0231348	0.0493826	-0.468481	0.639441	0.850206
TCONS_00002173	25262.6	-0.189047	0.049129	-3.84797	0.000119102	0.00235518
TCONS_00002376	25137	0.0415423	0.0654188	0.63502	0.525415	0.791164
TCONS_00012255	25004.8	-0.197355	0.058083	-3.39781	0.000679286	0.010015
TCONS_00000283	24880.5	-0.0454652	0.0473683	-0.959825	0.337143	0.654047
TCONS_00005813	24830.1	0.0649704	0.0510604	1.27242	0.203223	0.518845
TCONS_00005833	24794	0.0631334	0.0513707	1.22898	0.219081	0.537341
TCONS_00004147	24726.1	-0.171289	0.0594802	-2.87977	0.0039797	0.0416338
TCONS_00005448	24658.1	-0.0584728	0.0488821	-1.1962	0.231618	0.548778
TCONS_00003566	24596.5	-0.193724	0.0485865	-3.98719	6.68598e-05	0.00143727
TCONS_00000164	24555.1	-0.169308	0.0506858	-3.34035	0.000836724	0.0118536
TCONS_00010561	24525.2	-0.0678092	0.0596115	-1.13752	0.255321	0.572599
TCONS_00011860	24508.5	-0.00170921	0.0663382	-0.025765	0.979445	0.991995
TCONS_00013519	24334.3	-0.0246066	0.0499074	-0.493045	0.621981	0.840235
TCONS_00006667	24222.8	-0.0662809	0.0507824	-1.30519	0.191827	0.502197
TCONS_00010039	24161.6	-0.168331	0.0505158	-3.33225	0.000861481	0.0121173
TCONS_00007872	24026.2	0.115634	0.0644816	1.79329	0.0729273	0.294991
TCONS_00005410	23986.5	-0.0166453	0.0656032	-0.253727	0.799706	0.927616
TCONS_00011144	23977.4	-0.0464629	0.0548567	-0.846986	0.397003	0.70149
TCONS_00006106	23952.8	0.0208247	0.0559056	0.372497	0.709523	0.888152
TCONS_00005983	23805.9	-0.0828314	0.0560035	-1.47904	0.13913	0.423362
TCONS_00004338	23776.3	0.0358991	0.0524993	0.683801	0.494101	0.770741
TCONS_00012549	23747.4	-0.0359776	0.0490263	-0.733843	0.463044	0.752701
TCONS_00013775	23646.8	-0.0255861	0.0499517	-0.512217	0.608499	0.834225
TCONS_00012340	23586.5	-0.0448438	0.0505296	-0.887476	0.374823	0.684456
TCONS_00013700	23546.9	-0.325439	0.0497581	-6.54042	6.13469e-11	4.21459e-09
TCONS_00006798	23430.4	-0.0506965	0.0551104	-0.919907	0.357621	0.671321
TCONS_00012160	23396.3	0.0710666	0.0492047	1.44431	0.148653	0.436591
TCONS_00006584	23201	-0.159224	0.0581002	-2.74051	0.00613435	0.0567768
TCONS_00002575	23161	-0.00210664	0.0599224	-0.0351562	0.971955	0.990628
TCONS_00006889	22986.4	0.0119724	0.0533047	0.224602	0.822289	0.938285
TCONS_00004189	22814.7	-0.0699238	0.0596991	-1.17127	0.24149	0.559758
TCONS_00003884	22791.6	0.0998979	0.0669686	1.49171	0.135775	0.417922
TCONS_00004711	22603.1	-0.0784805	0.0713711	-1.09961	0.271501	0.588256
TCONS_00001209	22521.3	0.0365042	0.0677436	0.538857	0.589985	0.822351
TCONS_00007202	22517.1	0.101282	0.0558456	1.81361	0.0697374	0.287119
TCONS_00010049	22441.3	0.0712561	0.0507671	1.40359	0.160442	0.455554
TCONS_00003192	22297.2	0.0552342	0.0541002	1.02096	0.307273	0.627348
TCONS_00005913	22251.5	0.0564056	0.0471106	1.1973	0.231189	0.548778
TCONS_00001208	22086.3	0.121687	0.0538452	2.25994	0.0238251	0.146198
TCONS_00007680	21955.2	-0.188209	0.0662459	-2.84106	0.00449638	0.0452627
TCONS_00001976	21942.3	-0.103739	0.0789946	-1.31324	0.189102	0.498683
TCONS_00008103	21941.6	-0.0165965	0.0523851	-0.316817	0.751382	0.90912
TCONS_00008069	21656.5	0.113255	0.0487071	2.32523	0.0200598	0.13002
TCONS_00000054	21489.7	-0.0583615	0.0502828	-1.16066	0.245779	0.564512
TCONS_00003024	21411.2	-0.0771015	0.0514235	-1.49935	0.133784	0.413702
TCONS_00006218	21192.4	-0.120296	0.0489247	-2.45879	0.0139406	0.101088
TCONS_00008053	20766	0.0348794	0.0549675	0.634545	0.525725	0.791164
TCONS_00000808	20760	-0.00392377	0.0497954	-0.0787979	0.937193	0.978217
TCONS_00002458	20358.3	-0.139112	0.0640762	-2.17103	0.0299286	0.168592
TCONS_00008728	20191.4	0.0602105	0.0530207	1.1356	0.256122	0.573714
TCONS_00008675	20184.6	0.0621836	0.0513567	1.21082	0.225965	0.543755
TCONS_00008990	20108.6	-0.0235023	0.0626855	-0.374924	0.707717	0.887789
TCONS_00011503	20096.8	-0.00708288	0.0510138	-0.138842	0.889575	0.963381
TCONS_00007775	19835.7	-0.149488	0.0510431	-2.92867	0.00340421	0.0371287
TCONS_00009154	19789.6	-0.153346	0.0542212	-2.82815	0.00468176	0.0468457
TCONS_00011036	19702.7	-0.00924312	0.0534154	-0.173042	0.862618	0.952941
TCONS_00007933	19686.4	0.159021	0.0477519	3.33016	0.000867969	0.0121772
TCONS_00013990	19603.3	0.104739	0.0507845	2.06241	0.0391684	0.201092
TCONS_00008631	19580.3	-0.0398203	0.0494516	-0.805238	0.420682	0.721486
TCONS_00003947	19493.5	0.0423199	0.0609902	0.69388	0.487757	0.768436
TCONS_00006794	19406.4	0.00992019	0.0530824	0.186883	0.851753	0.949352
TCONS_00001082	19394.6	0.013058	0.0676103	0.193137	0.846852	0.948634
TCONS_00009119	19173	0.0519543	0.0519288	1.00049	0.317073	0.634903
TCONS_00004630	19171.7	0.0126604	0.0519339	0.243779	0.807402	0.931693
TCONS_00006041	19147.8	-0.0608106	0.0519265	-1.17109	0.241563	0.559758
TCONS_00007383	19134.2	0.0633217	0.0633153	1.0001	0.317261	0.634903
TCONS_00005218	19095.1	-0.0692233	0.0477454	-1.44984	0.147103	0.434532
TCONS_00000701	19076.8	0.0472526	0.0498648	0.947614	0.343326	0.66069
TCONS_00008672	19012.9	-0.10283	0.0724791	-1.41875	0.155972	0.447246
TCONS_00006946	19011.1	-0.131204	0.0536797	-2.44421	0.014517	0.103577
TCONS_00002108	18965.4	-0.0617272	0.051563	-1.19712	0.231259	0.548778
TCONS_00002489	18907.4	-0.0168727	0.0559318	-0.301666	0.762907	0.913733
TCONS_00009269	18828.2	0.043605	0.0542069	0.804419	0.421155	0.721486
TCONS_00009322	18691.1	-0.0647143	0.0580414	-1.11497	0.264865	0.583247
TCONS_00003015	18655.3	0.00817621	0.0483249	0.169193	0.865645	0.953067
TCONS_00009869	18649	0.15111	0.124525	1.21349	0.224943	0.542798
TCONS_00002468	18515.4	-0.0154884	0.0550757	-0.28122	0.778542	0.919664
TCONS_00014741	18399.8	0.0481088	0.0552368	0.870956	0.383778	0.692901
TCONS_00001605	18335.2	-0.107836	0.0581477	-1.85451	0.0636659	0.275258
TCONS_00005288	18320	-0.00555231	0.0559634	-0.0992133	0.920969	0.973333
TCONS_00000977	18317.6	0.00775195	0.0575248	0.134758	0.892803	0.965001
TCONS_00013632	18262.5	0.0654122	0.0526417	1.24259	0.214018	0.532965
TCONS_00011091	18235.4	0.0827928	0.0528926	1.5653	0.117513	0.38691
TCONS_00001025	18207.8	-0.0972022	0.0761891	-1.2758	0.202025	0.516583
TCONS_00003968	18176	0.0711029	0.0543041	1.30935	0.190417	0.500174
TCONS_00009555	18108.9	-0.0464386	0.0648987	-0.715555	0.474266	0.760835
TCONS_00001236	18087.4	0.0840092	0.0677662	1.23969	0.215089	0.533119
TCONS_00002952	18009.1	-0.0961114	0.0648605	-1.48182	0.138389	0.422069
TCONS_00007100	17967.8	-0.0622878	0.0538639	-1.15639	0.247521	0.565858
TCONS_00008038	17935.6	0.0384361	0.065041	0.590951	0.554553	0.804299
TCONS_00000748	17909.9	-0.0227681	0.0526014	-0.432842	0.66513	0.863556
TCONS_00005573	17853.1	0.0550399	0.0507887	1.0837	0.278497	0.597855
TCONS_00011379	17818.2	0.0479835	0.088992	0.539189	0.589757	0.822205
TCONS_00003875	17667.5	0.0776829	0.0711513	1.0918	0.274922	0.592905
TCONS_00013759	17659.8	-0.297028	0.0504706	-5.88516	3.97658e-09	2.17213e-07
TCONS_00009151	17627.7	-0.100297	0.0526302	-1.9057	0.0566896	0.254912
TCONS_00000276	17579.7	0.0727657	0.0622897	1.16818	0.242733	0.561339
TCONS_00006495	17304.5	0.148937	0.0581948	2.55928	0.0104888	0.0833103
TCONS_00006502	17297.8	0.151504	0.0584453	2.59223	0.00953569	0.0779166
TCONS_00006956	17270.8	0.0721328	0.0593703	1.21496	0.22438	0.542352
TCONS_00004871	17268.7	0.0288368	0.056787	0.507807	0.611589	0.836198
TCONS_00005335	17252	-0.091919	0.0492249	-1.86733	0.0618558	0.269481
TCONS_00007609	17235.3	-0.114665	0.050116	-2.28798	0.0221384	0.139443
TCONS_00010324	17169.1	-0.0721006	0.0525186	-1.37286	0.169796	0.472649
TCONS_00004416	17019.2	0.0744023	0.0647222	1.14956	0.250324	0.568822
TCONS_00009928	16972	-0.0125584	0.0532972	-0.235629	0.81372	0.934498
TCONS_00005583	16917.4	0.0613397	0.0494899	1.23944	0.215183	0.533119
TCONS_00004025	16891.5	0.0343853	0.058588	0.5869	0.557271	0.806123
TCONS_00000207	16881.2	-0.21421	0.0535398	-4.00095	6.30895e-05	0.00137845
TCONS_00002107	16867	0.0872875	0.0548897	1.59023	0.111782	0.374894
TCONS_00013817	16843.9	0.00961653	0.0565389	0.170087	0.864942	0.953067
TCONS_00009858	16768.6	0.0486299	0.0567663	0.85667	0.391628	0.698556
TCONS_00014716	16762	-0.231871	0.0836092	-2.77327	0.00554961	0.0531359
TCONS_00007182	16738.9	0.147993	0.0579253	2.55489	0.0106222	0.0836718
TCONS_00001302	16562.5	0.0621422	0.0481815	1.28975	0.197137	0.50957
TCONS_00001415	16455.2	-0.00598657	0.0508142	-0.117813	0.906216	0.968896
TCONS_00004555	16412.4	0.186939	0.0591724	3.15923	0.00158188	0.0203507
TCONS_00005408	16385.4	-0.173846	0.0544551	-3.19246	0.00141065	0.018505
TCONS_00006953	16184.4	-0.00450073	0.0656257	-0.0685819	0.945322	0.979295
TCONS_00005163	16156.1	-0.0852802	0.0515703	-1.65367	0.0981947	0.346961
TCONS_00005567	16064.4	-0.0792177	0.0615959	-1.28609	0.198412	0.511071
TCONS_00008026	16040.6	-0.107732	0.0596982	-1.80461	0.0711352	0.290281
TCONS_00003673	16028.3	-0.0328662	0.0500966	-0.656057	0.511787	0.783989
TCONS_00000778	16011.7	-0.0284223	0.0490585	-0.579356	0.562349	0.809022
TCONS_00006561	15943	0.0136267	0.0609627	0.223525	0.823127	0.938463
TCONS_00011041	15901	-0.0566834	0.0788051	-0.719285	0.471965	0.759521
TCONS_00005798	15807.7	-0.0742464	0.0572927	-1.29591	0.195006	0.506489
TCONS_00002508	15748.5	-0.069437	0.0538261	-1.29002	0.197042	0.50957
TCONS_00000506	15730.5	0.150207	0.0566761	2.65028	0.0080426	0.0685369
TCONS_00004748	15592.5	-0.113354	0.0495936	-2.28565	0.0222749	0.139642
TCONS_00010014	15582.9	0.0787632	0.0727168	1.08315	0.278742	0.597855
TCONS_00003112	15497.2	0.063222	0.0517996	1.22051	0.222271	0.54059
TCONS_00001227	15492.8	0.087617	0.051974	1.68579	0.0918372	0.334794
TCONS_00005409	15489.6	0.0546101	0.0558823	0.977234	0.328454	0.645255
TCONS_00009010	15478.9	0.0216408	0.0496861	0.435551	0.663163	0.86263
TCONS_00005936	15460.5	0.174446	0.0625082	2.79076	0.00525836	0.0512306
TCONS_00012982	15405.5	-0.118273	0.0500632	-2.36248	0.0181533	0.121826
TCONS_00013549	15395.4	-0.0725314	0.131335	-0.552264	0.580768	0.818015
TCONS_00003310	15136.9	-0.000291478	0.0624433	-0.00466788	0.996276	0.998918
TCONS_00013131	15131.3	-0.173308	0.0608093	-2.85002	0.00437167	0.0444098
TCONS_00001959	15108.4	0.00385914	0.057414	0.067216	0.94641	0.979295
TCONS_00013080	15060.8	-0.149217	0.0484944	-3.077	0.00209096	0.0251974
TCONS_00007663	14990.1	-0.0732778	0.050069	-1.46354	0.14332	0.428902
TCONS_00000444	14979.2	-0.14215	0.0515024	-2.76006	0.00577903	0.0546523
TCONS_00007535	14926	0.0122123	0.0564568	0.216311	0.828745	0.941005
TCONS_00012732	14905	-0.155093	0.0603282	-2.57082	0.0101459	0.0814607
TCONS_00012038	14892.4	0.0126457	0.0494027	0.255971	0.797973	0.927235
TCONS_00002374	14772.7	-0.0979057	0.0763272	-1.28271	0.199593	0.512954
TCONS_00006261	14730.6	0.0953091	0.062353	1.52854	0.126378	0.403112
TCONS_00008557	14724.4	0.110624	0.0522275	2.11812	0.0341652	0.183873
TCONS_00005949	14671.2	-0.140002	0.0563297	-2.48541	0.0129402	0.0960519
TCONS_00002008	14626.1	-0.204735	0.0540647	-3.78686	0.000152566	0.00293844
TCONS_00004448	14624.2	0.0147561	0.0593898	0.248461	0.803777	0.929959
TCONS_00012981	14604.1	-0.132622	0.0498841	-2.6586	0.00784651	0.0674699
TCONS_00004823	14555.9	0.165434	0.0645841	2.56153	0.0104212	0.0831412
TCONS_00005112	14520.8	-0.0897274	0.0512081	-1.75221	0.0797374	0.308936
TCONS_00013538	14489.6	0.00152868	0.0501237	0.0304983	0.97567	0.990987
TCONS_00010247	14446.1	0.0279483	0.0745812	0.374737	0.707856	0.887789
TCONS_00000435	14438.3	0.144948	0.0592445	2.44661	0.0144207	0.103333
TCONS_00010639	14411.3	-0.0012907	0.0580285	-0.0222425	0.982255	0.993284
TCONS_00010306	14381.8	-0.103711	0.0531225	-1.9523	0.0509026	0.239898
TCONS_00009272	14381.1	-0.0444592	0.0498711	-0.891483	0.37267	0.682304
TCONS_00008495	14355.2	-0.01369	0.0549012	-0.249357	0.803085	0.929447
TCONS_00000617	14353.2	-0.113939	0.0509403	-2.23671	0.0253055	0.150702
TCONS_00008637	14315	-0.0939338	0.0797393	-1.17801	0.238792	0.557182
TCONS_00002621	14311.5	0.130006	0.0553862	2.34726	0.0189119	0.124976
TCONS_00000062	14302.6	-0.302619	0.0628452	-4.8153	1.4698e-06	5.02296e-05
TCONS_00006414	14298.9	0.128757	0.0707006	1.82116	0.068582	0.284754
TCONS_00005140	14215.8	-0.237491	0.0566585	-4.19162	2.76968e-05	0.000673618
TCONS_00000792	14141	-0.0876687	0.0491763	-1.78274	0.0746279	0.298333
TCONS_00001634	14132.7	-0.0252888	0.055913	-0.452289	0.651061	0.856025
TCONS_00005190	14088.4	-0.0035268	0.0522759	-0.0674651	0.946211	0.979295
TCONS_00002739	14040.4	-0.0814656	0.0562984	-1.44703	0.147888	0.435496
TCONS_00010710	14029.8	0.157575	0.0571446	2.75748	0.00582492	0.054848
TCONS_00007947	14000.9	-0.0895536	0.062265	-1.43827	0.150359	0.439277
TCONS_00004802	14000.6	0.129274	0.0708466	1.8247	0.0680468	0.284726
TCONS_00004284	13987.5	0.046009	0.0535219	0.85963	0.389993	0.696865
TCONS_00009859	13950.7	-0.0788423	0.0518585	-1.52033	0.128427	0.405632
TCONS_00002705	13936.3	-0.0828404	0.0674222	-1.22868	0.219192	0.537415
TCONS_00000073	13925.9	0.0145626	0.0548266	0.265612	0.790538	0.92371
TCONS_00006342	13860.4	-0.0610079	0.0531929	-1.14692	0.251415	0.569471
TCONS_00007530	13838.1	0.0177705	0.0542494	0.32757	0.743236	0.905182
TCONS_00009361	13772	-0.0331507	0.0485967	-0.682159	0.495138	0.771476
TCONS_00006554	13733	0.0321777	0.0691959	0.465024	0.641914	0.851626
TCONS_00010592	13708.1	-0.0795599	0.0520964	-1.52717	0.126719	0.403468
TCONS_00003106	13692.1	0.0132572	0.06393	0.207371	0.83572	0.944099
TCONS_00013558	13688.6	-0.0817826	0.0510648	-1.60155	0.109256	0.370338
TCONS_00009129	13622.5	-0.0145113	0.0499534	-0.290497	0.771436	0.917961
TCONS_00003221	13583.5	-0.0593761	0.0618632	-0.959796	0.337158	0.654047
TCONS_00000656	13516.7	-0.856465	0.0603328	-14.1957	9.74374e-46	2.70551e-43
TCONS_00010186	13402	-0.0491737	0.0776143	-0.633565	0.526365	0.791164
TCONS_00011112	13352.5	-0.0978107	0.0617891	-1.58298	0.113426	0.378694
TCONS_00000975	13338.7	0.0929742	0.0639027	1.45493	0.145688	0.43342
TCONS_00008498	13291	0.0704494	0.0635546	1.10849	0.267652	0.585008
TCONS_00007390	13273.5	-0.00559935	0.0785242	-0.0713073	0.943153	0.979086
TCONS_00004203	13222.5	0.159699	0.0641046	2.49123	0.0127302	0.095319
TCONS_00010486	13054.2	-0.474222	0.0510915	-9.28181	1.66624e-20	2.3133e-18
TCONS_00005136	13035.7	0.0396586	0.0549395	0.721861	0.47038	0.758068
TCONS_00006607	13015.1	0.0660905	0.0727465	0.908505	0.363612	0.675281
TCONS_00007568	13013.1	-0.0191133	0.065832	-0.290335	0.77156	0.917961
TCONS_00007511	13002.2	0.0355537	0.0527466	0.674047	0.500281	0.774419
TCONS_00004089	12957.1	-0.0256418	0.0552964	-0.463717	0.642851	0.85202
TCONS_00010242	12857	-0.00481511	0.0656876	-0.0733031	0.941565	0.979086
TCONS_00011973	12824.7	0.0529294	0.0595526	0.888783	0.37412	0.684188
TCONS_00003649	12822.6	0.248947	0.0589205	4.22513	2.38801e-05	0.000598259
TCONS_00000817	12800.8	-0.0933083	0.0542975	-1.71846	0.085712	0.321718
TCONS_00011183	12752.5	0.133573	0.138605	0.963696	0.335198	0.651622
TCONS_00009212	12749.4	0.130379	0.0660387	1.97429	0.0483492	0.23314
TCONS_00000710	12746.1	-0.0386605	0.0511241	-0.75621	0.449523	0.742226
TCONS_00007145	12725.6	0.0695663	0.0569837	1.22081	0.222158	0.54059
TCONS_00008543	12712.5	0.13227	0.0495505	2.66941	0.00759857	0.0659334
TCONS_00007319	12674.3	-0.0860611	0.058202	-1.47866	0.13923	0.423462
TCONS_00001675	12670.8	0.130929	0.0528814	2.47591	0.0132899	0.0977525
TCONS_00001481	12603.3	0.119707	0.0532386	2.24851	0.024544	0.148398
TCONS_00001713	12561.5	0.0654701	0.0532612	1.22923	0.218986	0.537307
TCONS_00002044	12537.8	-0.166835	0.0617175	-2.70321	0.00686735	0.0611819
TCONS_00014660	12463	-0.47144	0.0629395	-7.49036	6.86873e-14	6.2703e-12
TCONS_00007274	12452.5	0.0528377	0.0723213	0.730597	0.465025	0.754181
TCONS_00007174	12430.6	0.00945072	0.0787844	0.119957	0.904517	0.968896
TCONS_00008396	12380.7	0.00796515	0.0536711	0.148407	0.882022	0.959577
TCONS_00004554	12285.9	0.0402699	0.0525385	0.766484	0.443388	0.73776
TCONS_00001414	12277.8	-0.00608506	0.0508697	-0.11962	0.904784	0.968896
TCONS_00010150	12277.6	0.192973	0.0624655	3.08928	0.00200641	0.0243991
TCONS_00009144	12270.1	-0.178614	0.0605282	-2.95092	0.00316826	0.0351889
TCONS_00012562	12254	-0.0367986	0.0625803	-0.588022	0.556518	0.805699
TCONS_00012611	12247.3	-0.146659	0.0709292	-2.06768	0.0386706	0.199459
TCONS_00001867	12239	-0.0870995	0.0539387	-1.61479	0.106357	0.364028
TCONS_00000976	12232.7	-0.205427	0.0564249	-3.64072	0.000271878	0.00483146
TCONS_00014510	12187.3	0.0151824	0.0758232	0.200234	0.841298	0.946568
TCONS_00010402	12139.9	0.0303757	0.0558406	0.543971	0.586461	0.820467
TCONS_00000768	12137.9	-0.0369082	0.0515281	-0.716273	0.473823	0.760623
TCONS_00010426	12115.6	0.0240393	0.0516642	0.465299	0.641718	0.851572
TCONS_00005395	12077.9	-0.161415	0.0526319	-3.06687	0.00216312	0.0258334
TCONS_00004412	12076.1	-0.053539	0.0547123	-0.978556	0.327799	0.645255
TCONS_00001891	12053	0.129673	0.0705111	1.83905	0.0659082	0.279543
TCONS_00005267	12033.4	-0.00985094	0.0496714	-0.198322	0.842793	0.946616
TCONS_00013360	12024.6	-0.197228	0.0557089	-3.54032	0.000399638	0.0066084
TCONS_00001146	12014.9	0.0540285	0.0593246	0.910726	0.36244	0.674853
TCONS_00011688	11996.6	0.0696125	0.0497057	1.40049	0.161366	0.457008
TCONS_00008584	11916.4	0.0132832	0.0600635	0.221153	0.824974	0.939718
TCONS_00007340	11885.8	-0.145166	0.054941	-2.64221	0.00823672	0.0699229
TCONS_00005403	11836.5	-0.171475	0.0523636	-3.27469	0.00105778	0.0144153
TCONS_00009996	11791.1	-0.147171	0.0614431	-2.39523	0.0166097	0.113759
TCONS_00006323	11778.7	-0.0816585	0.0494664	-1.65079	0.0987823	0.348483
TCONS_00002613	11727.3	0.0252655	0.0536486	0.470944	0.637681	0.849391
TCONS_00000230	11720.4	0.155937	0.0697073	2.23702	0.0252851	0.150702
TCONS_00005450	11710	-0.191957	0.0654904	-2.93107	0.00337796	0.0369028
TCONS_00006534	11697.3	0.0531838	0.0604536	0.879747	0.378997	0.688559
TCONS_00000470	11630.2	0.0938309	0.063918	1.46799	0.142107	0.427155
TCONS_00006141	11589.8	0.0828374	0.0544319	1.52185	0.128046	0.405189
TCONS_00002863	11577.5	-0.00869099	0.0651134	-0.133475	0.893818	0.965381
TCONS_00006247	11570.1	0.125345	0.0601092	2.08528	0.0370438	0.193615
TCONS_00004365	11548.7	-0.0470476	0.0682956	-0.688882	0.490897	0.76997
TCONS_00002686	11531.9	-0.112991	0.0518159	-2.18063	0.0292109	0.165885
TCONS_00002049	11483.3	0.195255	0.05635	3.46504	0.000530152	0.00821612
TCONS_00009711	11468.2	-0.0166497	0.0504529	-0.330004	0.741397	0.904057
TCONS_00013006	11464.2	0.0983428	0.0608956	1.61494	0.106323	0.364028
TCONS_00001137	11453.9	0.141464	0.0590119	2.39721	0.0165205	0.113497
TCONS_00008781	11446.2	-0.0734442	0.0549487	-1.3366	0.181355	0.488879
TCONS_00014261	11423.2	0.0460728	0.0531842	0.866287	0.386333	0.694743
TCONS_00009328	11400.1	0.0510153	0.0532267	0.958454	0.337834	0.65412
TCONS_00001557	11359.5	-0.00926037	0.0565466	-0.163765	0.869916	0.954241
TCONS_00005273	11355.6	-0.00592581	0.0640909	-0.0924595	0.926333	0.974135
TCONS_00011070	11353.3	-0.0310929	0.0625329	-0.497225	0.619031	0.8388
TCONS_00009671	11349.7	0.141197	0.0613245	2.30246	0.0213095	0.135762
TCONS_00011113	11344.1	0.0478828	0.0529672	0.904007	0.365992	0.677061
TCONS_00011034	11328.9	-0.0700089	0.0713449	-0.981274	0.326458	0.644909
TCONS_00007907	11326.5	0.129935	0.0546776	2.37639	0.017483	0.118401
TCONS_00011822	11317.1	0.25228	0.0599953	4.205	2.61087e-05	0.000642023
TCONS_00005531	11282.5	0.193549	0.0678463	2.85275	0.00433429	0.0441569
TCONS_00002632	11280.9	0.166535	0.0527598	3.15647	0.0015969	0.0205043
TCONS_00001400	11251.3	-0.0107887	0.0504533	-0.213835	0.830676	0.941112
TCONS_00011901	11216.6	-0.0444062	0.0512384	-0.866658	0.386129	0.694743
TCONS_00002253	11168.1	0.0604785	0.056502	1.07038	0.28445	0.605421
TCONS_00002623	11163.8	0.0529996	0.0516082	1.02696	0.304439	0.624361
TCONS_00002650	11132.3	0.00958326	0.0499122	0.192002	0.84774	0.948831
TCONS_00011466	11128.4	-0.307409	0.0528408	-5.81764	5.96838e-09	3.18186e-07
TCONS_00006224	11108.3	0.0391317	0.0639836	0.61159	0.540809	0.799812
TCONS_00004275	11101.9	-0.11765	0.0555685	-2.11721	0.0342416	0.183873
TCONS_00012814	11057.8	-0.0899751	0.0530733	-1.6953	0.0900191	0.331246
TCONS_00009920	11049.4	-0.0883203	0.0670595	-1.31704	0.187824	0.497783
TCONS_00009650	11028.9	-0.262329	0.052443	-5.00217	5.66876e-07	2.0987e-05
TCONS_00010624	11026.2	-0.256984	0.0706219	-3.63887	0.000273832	0.00485323
TCONS_00002904	11005.2	-0.0269617	0.0689625	-0.390962	0.695826	0.882104
TCONS_00005614	10983.9	0.0710311	0.055372	1.2828	0.199563	0.512954
TCONS_00002387	10974	-0.0800463	0.0502477	-1.59304	0.111152	0.3741
TCONS_00005053	10965.9	0.0702712	0.051719	1.35871	0.174238	0.480001
TCONS_00011664	10944.8	0.177193	0.0506081	3.50129	0.000463019	0.00739942
TCONS_00003772	10943	0.195077	0.0681927	2.86067	0.00422744	0.0432744
TCONS_00005378	10839.8	0.0746278	0.056265	1.32636	0.18472	0.492467
TCONS_00000089	10785.2	0.00291099	0.0605302	0.0480915	0.961643	0.986102
TCONS_00006249	10779.9	0.12042	0.0518744	2.32137	0.0202668	0.131124
TCONS_00011152	10759.9	0.00416505	0.0568359	0.0732821	0.941582	0.979086
TCONS_00014560	10668.4	-0.0492689	0.0619428	-0.795394	0.426384	0.724861
TCONS_00004349	10654.9	-0.175125	0.0544927	-3.21373	0.00131022	0.0173239
TCONS_00006733	10648.9	-0.181421	0.0543076	-3.34062	0.000835923	0.0118536
TCONS_00010955	10615.9	-0.19017	0.0634722	-2.99612	0.00273439	0.0310955
TCONS_00001895	10588	0.0128906	0.0571257	0.225654	0.82147	0.938019
TCONS_00001808	10587.9	0.0729548	0.0573803	1.27142	0.203578	0.518845
TCONS_00005100	10522.1	0.0323512	0.0519604	0.622612	0.53354	0.794527
TCONS_00013289	10516.6	0.153165	0.0876767	1.74693	0.0806491	0.311298
TCONS_00007731	10494.6	0.0963069	0.0707726	1.36079	0.173579	0.478779
TCONS_00009150	10491.9	0.046562	0.0534587	0.87099	0.383759	0.692901
TCONS_00001243	10481.4	-0.132667	0.13103	-1.01249	0.311302	0.631127
TCONS_00010152	10472.6	-0.110726	0.0562716	-1.96771	0.0491018	0.234394
TCONS_00012177	10472.2	0.10577	0.0497671	2.1253	0.0335618	0.182593
TCONS_00006238	10466.6	0.010097	0.0609279	0.16572	0.868377	0.953872
TCONS_00004525	10454.8	0.0599685	0.0546856	1.0966	0.272814	0.589697
TCONS_00004770	10431.8	0.0343415	0.124108	0.276706	0.782006	0.92037
TCONS_00000766	10413.5	0.113707	0.0582964	1.95049	0.051118	0.240617
TCONS_00010688	10404	-0.00220087	0.0640789	-0.0343462	0.972601	0.990628
TCONS_00002864	10397.6	0.235824	0.0528564	4.4616	8.13496e-06	0.000240896
TCONS_00005328	10383.3	0.199739	0.0566974	3.52289	0.000426864	0.00700386
TCONS_00011789	10368.3	0.0178625	0.0749268	0.2384	0.811571	0.933916
TCONS_00012949	10330	0.175357	0.0599679	2.92419	0.00345356	0.037483
TCONS_00006774	10305.9	0.150387	0.0720636	2.08687	0.0369	0.193615
TCONS_00002658	10296.2	0.122863	0.0840798	1.46126	0.143944	0.429575
TCONS_00007739	10274.6	-0.10477	0.0505418	-2.07293	0.0381786	0.197423
TCONS_00004610	10268.6	0.0843501	0.0546732	1.5428	0.122878	0.397313
TCONS_00006239	10267.2	0.0373207	0.05287	0.705895	0.480253	0.764042
TCONS_00008276	10215.8	0.0619939	0.0677132	0.915536	0.35991	0.672491
TCONS_00007229	10213.8	-0.0248665	0.0543205	-0.457773	0.647115	0.853767
TCONS_00000655	10199	0.247033	0.0633498	3.89951	9.63893e-05	0.00197036
TCONS_00014361	10198.4	0.226583	0.0553454	4.09398	4.24037e-05	0.000992393
TCONS_00004088	10193	0.120013	0.0562302	2.13432	0.0328168	0.179845
TCONS_00011831	10175.9	0.00019849	0.0521068	0.00380929	0.996961	0.998918
TCONS_00001265	10162.6	-0.133896	0.13213	-1.01337	0.310885	0.631127
TCONS_00009456	10151	0.119348	0.054634	2.1845	0.0289256	0.164612
TCONS_00012117	10136.6	0.207736	0.0538748	3.8559	0.000115304	0.00228687
TCONS_00005108	10101.2	0.065276	0.0519968	1.25538	0.209339	0.527495
TCONS_00012114	10097.7	0.212306	0.0542264	3.91518	9.03361e-05	0.00187539
TCONS_00001287	10044.8	0.214773	0.0639692	3.35745	0.00078664	0.0112493
TCONS_00009356	10026.8	-0.0715959	0.0538819	-1.32876	0.183929	0.49187
TCONS_00009414	10023.3	0.0735126	0.069685	1.05493	0.291459	0.612925
TCONS_00014680	9997.21	-0.0489899	0.0891792	-0.549341	0.582771	0.818804
TCONS_00000206	9973.07	0.0714816	0.0576746	1.23939	0.215199	0.533119
TCONS_00003844	9966	0.104563	0.0660437	1.58324	0.113366	0.378683
TCONS_00011701	9915.04	-0.0476079	0.0741107	-0.64239	0.52062	0.788575
TCONS_00007168	9899.83	0.183879	0.0566131	3.24799	0.00116223	0.0155837
TCONS_00006432	9877.17	-0.0438901	0.0611542	-0.717696	0.472945	0.760262
TCONS_00003913	9860.78	-0.12631	0.0632613	-1.99665	0.0458635	0.224896
TCONS_00004849	9846.88	-0.0494094	0.0579275	-0.852951	0.393686	0.700728
TCONS_00004111	9842.49	-0.174549	0.0584729	-2.98513	0.00283459	0.0320164
TCONS_00003038	9833.21	0.0482066	0.0556339	0.866496	0.386218	0.694743
TCONS_00005154	9819.06	0.205331	0.0569534	3.60524	0.000311866	0.00535639
TCONS_00008987	9804.6	0.0865043	0.0605907	1.42768	0.153383	0.44364
TCONS_00010707	9776.52	0.100281	0.0581868	1.72343	0.0848102	0.320361
TCONS_00010375	9762.96	-0.121201	0.0647495	-1.87185	0.0612279	0.26755
TCONS_00005262	9752.41	0.0585206	0.0728339	0.803481	0.421697	0.721486
TCONS_00003102	9712.68	0.165481	0.0569878	2.90379	0.00368672	0.0395141
TCONS_00005407	9692.52	-0.54052	0.0573138	-9.43089	4.0664e-21	6.02189e-19
TCONS_00000217	9685.78	0.215021	0.0589118	3.64988	0.000262364	0.0047216
TCONS_00008079	9679.07	0.099233	0.0666711	1.4884	0.136646	0.419057
TCONS_00007049	9673.12	0.128046	0.057022	2.24555	0.0247331	0.149024
TCONS_00010472	9670.71	-0.151452	0.0543029	-2.78903	0.00528668	0.0513563
TCONS_00012550	9669.03	0.0882272	0.0551827	1.59882	0.109861	0.371442
TCONS_00009691	9648.14	-0.0352659	0.0581543	-0.60642	0.544236	0.800939
TCONS_00006112	9631.74	-0.0567945	0.0553361	-1.02635	0.304725	0.624442
TCONS_00007593	9617.23	-0.144867	0.0598109	-2.42208	0.015432	0.107684
TCONS_00000523	9596.89	0.112441	0.0556084	2.02202	0.0431743	0.215683
TCONS_00007203	9574.97	-0.181688	0.0535214	-3.39468	0.000687096	0.0100855
TCONS_00010943	9559.51	-0.0387353	0.0773708	-0.500645	0.616621	0.837976
TCONS_00002456	9511.19	-0.161167	0.060678	-2.6561	0.00790501	0.0677979
TCONS_00002577	9496.72	-0.0118107	0.0825413	-0.143088	0.88622	0.961696
TCONS_00001003	9482.87	-0.176651	0.0571294	-3.09212	0.00198733	0.0242113
TCONS_00013435	9461.66	-0.0178931	0.0544287	-0.328744	0.74235	0.904887
TCONS_00001176	9445.47	0.0317337	0.0863026	0.367703	0.713095	0.888901
TCONS_00001301	9440.54	0.00724624	0.0808766	0.0895962	0.928608	0.975083
TCONS_00004657	9435.06	0.00844908	0.0648858	0.130215	0.896397	0.96597
TCONS_00004814	9425.41	-0.00915022	0.0540824	-0.16919	0.865647	0.953067
TCONS_00010773	9413.1	-0.16661	0.0533617	-3.12228	0.00179455	0.0224369
TCONS_00012860	9406.1	0.17009	0.058803	2.89254	0.00382146	0.0404225
TCONS_00012020	9396.99	-0.0707956	0.0540289	-1.31033	0.190085	0.499891
TCONS_00000978	9393.5	-0.136278	0.053623	-2.5414	0.0110409	0.0858414
TCONS_00000412	9392.25	-0.0660522	0.0681647	-0.969008	0.332541	0.649431
TCONS_00009402	9380.71	0.00735764	0.0578626	0.127157	0.898816	0.966862
TCONS_00010578	9380.04	0.317718	0.072981	4.35343	1.34024e-05	0.000355831
TCONS_00011305	9374.6	0.0238978	0.0571749	0.417977	0.675964	0.870447
TCONS_00010370	9354.6	-0.030736	0.0598642	-0.513429	0.607651	0.833907
TCONS_00003273	9350.08	0.0165463	0.0560441	0.295237	0.767813	0.915627
TCONS_00000677	9316.78	0.0991799	0.054099	1.83331	0.0667572	0.282099
TCONS_00003976	9313.49	0.0797742	0.0657528	1.21324	0.225036	0.542798
TCONS_00001164	9295.59	-0.0268687	0.050065	-0.536678	0.59149	0.82354
TCONS_00007906	9291.68	0.0775218	0.0652254	1.18852	0.234628	0.552885
TCONS_00011210	9280.69	-0.957011	0.0671687	-14.2479	4.62189e-46	1.33914e-43
TCONS_00008870	9274.83	-0.0603587	0.0609402	-0.990458	0.32195	0.640792
TCONS_00006205	9271.97	-0.0935183	0.0689685	-1.35596	0.175113	0.481051
TCONS_00014161	9254.19	0.018157	0.061218	0.296596	0.766775	0.915627
TCONS_00009539	9209.96	0.0409313	0.0520819	0.785903	0.431924	0.728882
TCONS_00007449	9206.3	-0.0501711	0.0574162	-0.873815	0.382219	0.691738
TCONS_00008034	9204.45	-0.00802456	0.0637821	-0.125812	0.899881	0.967729
TCONS_00001843	9171.33	0.0563769	0.0613665	0.918691	0.358257	0.671946
TCONS_00010537	9168.67	-0.0468096	0.0587552	-0.796689	0.425632	0.724861
TCONS_00007023	9147.29	0.09491	0.058765	1.61508	0.106294	0.364028
TCONS_00012409	9144.98	-0.105321	0.0728356	-1.44602	0.148173	0.435756
TCONS_00001280	9120.37	0.112029	0.0673744	1.66279	0.0963553	0.342419
TCONS_00002142	9089.62	-0.0304611	0.124752	-0.244174	0.807096	0.931693
TCONS_00011213	9074.51	-0.911297	0.0635798	-14.3331	1.35842e-46	4.11478e-44
TCONS_00005950	9066.27	-0.108103	0.0640147	-1.68872	0.0912738	0.3334
TCONS_00001088	9047.4	-0.0674443	0.0601483	-1.1213	0.26216	0.58099
TCONS_00005642	9045.5	0.0275968	0.0606148	0.455281	0.648907	0.854439
TCONS_00004545	9038.04	0.0154329	0.0522369	0.295441	0.767657	0.915627
TCONS_00007370	9018.28	0.279023	0.0693977	4.02064	5.80391e-05	0.00128924
TCONS_00011976	9009.27	-0.0315692	0.0519178	-0.608061	0.543147	0.80074
TCONS_00004907	9006.37	0.0621205	0.0537789	1.15511	0.248046	0.566451
TCONS_00012893	8990.42	0.0217966	0.0594578	0.36659	0.713925	0.889436
TCONS_00001509	8980.47	-0.00853937	0.055364	-0.154241	0.87742	0.956977
TCONS_00008340	8973.46	0.0674976	0.05209	1.29579	0.195049	0.506489
TCONS_00011681	8921.23	0.135544	0.0796876	1.70095	0.0889526	0.329052
TCONS_00011277	8843.43	0.0144613	0.0513124	0.281828	0.778075	0.919664
TCONS_00009315	8824.92	0.0220557	0.0575234	0.383422	0.701407	0.884089
TCONS_00013469	8816.66	-0.102654	0.053139	-1.93181	0.0533836	0.245344
TCONS_00003680	8816.22	0.0939562	0.0533905	1.75979	0.078443	0.307247
TCONS_00011851	8791.32	-0.125376	0.0521788	-2.40282	0.0162693	0.112119
TCONS_00013379	8779.49	-0.114759	0.053791	-2.13342	0.0328906	0.180101
TCONS_00006464	8772.22	0.0872487	0.0539344	1.61768	0.105731	0.363379
TCONS_00012628	8771.22	0.0848548	0.0667339	1.27154	0.203537	0.518845
TCONS_00010749	8753.93	-0.020949	0.0543518	-0.385433	0.699917	0.883858
TCONS_00000767	8747.7	0.208941	0.0892534	2.34098	0.0192331	0.126459
TCONS_00000730	8699.59	0.113331	0.0693623	1.6339	0.102281	0.356052
TCONS_00003496	8689.35	0.0997352	0.0672881	1.48221	0.138284	0.422069
TCONS_00012384	8674.18	-0.0778505	0.0577119	-1.34895	0.177353	0.484365
TCONS_00001443	8672.34	0.0233421	0.0640439	0.364471	0.715506	0.889498
TCONS_00010050	8665.66	-0.141507	0.052737	-2.68327	0.0072907	0.0637601
TCONS_00004219	8664.28	0.150458	0.0678983	2.21593	0.026696	0.156055
TCONS_00003775	8664.09	-0.103	0.0632927	-1.62736	0.103662	0.3583
TCONS_00003524	8657.83	0.0421305	0.0571616	0.737042	0.461097	0.75218
TCONS_00004883	8636.83	-0.0393898	0.0591564	-0.665859	0.505501	0.778426
TCONS_00001261	8622.95	0.18958	0.0696404	2.72227	0.00648349	0.0588806
TCONS_00007073	8606.56	0.0935778	0.0714937	1.30889	0.19057	0.500378
TCONS_00000377	8605.89	-0.00577427	0.134355	-0.0429777	0.965719	0.987529
TCONS_00008373	8597.9	-0.0167325	0.0668826	-0.250178	0.80245	0.929202
TCONS_00003400	8589.4	-0.0482313	0.0672107	-0.717612	0.472996	0.760262
TCONS_00003389	8569.18	0.102001	0.058196	1.75271	0.0796526	0.308936
TCONS_00005266	8555.56	0.158881	0.0574955	2.76336	0.00572088	0.0542955
TCONS_00003185	8552.91	0.149773	0.0539113	2.77814	0.00546707	0.0526482
TCONS_00004223	8543.41	-0.20621	0.0711887	-2.89667	0.00377141	0.0399565
TCONS_00007608	8518.75	-0.108123	0.0510211	-2.11917	0.0340757	0.183873
TCONS_00002501	8499.48	0.0126839	0.0521858	0.243053	0.807965	0.931707
TCONS_00001830	8489.06	-0.120587	0.0546368	-2.20707	0.0273094	0.157703
TCONS_00005627	8481.21	0.0206695	0.0524616	0.393992	0.693587	0.881715
TCONS_00003201	8474.36	0.124594	0.0587247	2.12167	0.0338656	0.183629
TCONS_00008386	8471.77	0.0542213	0.0712129	0.761398	0.44642	0.739538
TCONS_00012708	8468.61	-0.0493969	0.0719088	-0.686937	0.492122	0.77038
TCONS_00011993	8435.95	0.0283146	0.05239	0.540458	0.588881	0.821844
TCONS_00005423	8421.69	0.233121	0.0803936	2.89975	0.00373463	0.0396931
TCONS_00000475	8419.79	-0.214465	0.058499	-3.66614	0.000246243	0.00450815
TCONS_00011190	8414.25	0.0477709	0.0551299	0.866515	0.386208	0.694743
TCONS_00009953	8412.96	0.127562	0.0580729	2.19658	0.0280504	0.160867
TCONS_00013781	8399.64	0.242199	0.0567183	4.27021	1.95291e-05	0.000502479
TCONS_00006254	8377.76	0.00029834	0.0774819	0.00385044	0.996928	0.998918
TCONS_00003094	8355.76	0.0534672	0.0588543	0.908468	0.363631	0.675281
TCONS_00005299	8354.37	0.0267712	0.0681149	0.39303	0.694297	0.881715
TCONS_00003017	8345.17	-0.0841649	0.0543787	-1.54775	0.121681	0.394591
TCONS_00004464	8298.38	-0.13759	0.0583298	-2.35883	0.0183326	0.122348
TCONS_00001289	8279.9	0.00828099	0.0554437	0.149358	0.881271	0.959266
TCONS_00007448	8262.3	0.0140117	0.0613807	0.228275	0.819432	0.936705
TCONS_00005340	8256.25	0.207828	0.0537909	3.86362	0.000111719	0.00222902
TCONS_00001177	8248.15	0.0110243	0.0510398	0.215995	0.828992	0.941053
TCONS_00009325	8242.54	0.099991	0.0534264	1.87157	0.0612667	0.26755
TCONS_00010709	8242.45	0.0983335	0.0568824	1.72872	0.0838601	0.317525
TCONS_00006487	8224.86	0.124744	0.0588995	2.1179	0.0341831	0.183873
TCONS_00000829	8202.29	-0.0823841	0.0570616	-1.44377	0.148802	0.436837
TCONS_00007888	8199.38	0.0830467	0.0536762	1.54718	0.12182	0.394849
TCONS_00001863	8197.37	-0.0400789	0.0711049	-0.563659	0.572987	0.814349
TCONS_00003883	8152.52	0.0319535	0.0591226	0.540462	0.588878	0.821844
TCONS_00005007	8151.85	0.0798511	0.0642858	1.24213	0.21419	0.533119
TCONS_00001766	8149.42	0.104814	0.0524413	1.99869	0.045642	0.224471
TCONS_00001777	8133.29	0.194894	0.0695683	2.80148	0.00508685	0.0499245
TCONS_00002389	8130.96	-0.05907	0.0566252	-1.04317	0.296867	0.618342
TCONS_00002645	8096.99	0.0271934	0.0535532	0.507783	0.611606	0.836198
TCONS_00012493	8089.7	-0.124864	0.0580306	-2.15169	0.0314214	0.174708
TCONS_00001577	8084.54	-0.0366267	0.0649929	-0.563548	0.573062	0.814349
TCONS_00009612	8064.07	-0.00693426	0.0828532	-0.0836934	0.9333	0.976606
TCONS_00009977	8052.72	-0.0526231	0.0569874	-0.923417	0.35579	0.670149
TCONS_00005415	8043	-0.187773	0.0553741	-3.39099	0.000696417	0.0101775
TCONS_00003792	8039.75	0.150158	0.0564738	2.65889	0.00783988	0.0674699
TCONS_00006055	8007.99	0.0579284	0.0627244	0.923538	0.355727	0.670149
TCONS_00006789	8001.24	-0.0679003	0.0647756	-1.04824	0.294528	0.615977
TCONS_00010081	7998.79	-0.00391321	0.0608844	-0.0642728	0.948753	0.980298
TCONS_00004085	7979.23	0.0748541	0.0552728	1.35427	0.175651	0.481901
TCONS_00001267	7975.44	0.128716	0.0571861	2.25082	0.024397	0.148071
TCONS_00000805	7960.69	0.176292	0.0696276	2.53192	0.011344	0.0872937
TCONS_00006883	7948.51	0.0581917	0.0526348	1.10557	0.268911	0.586394
TCONS_00005526	7948	0.161125	0.0554901	2.90367	0.00368814	0.0395141
TCONS_00008007	7923.94	0.0206297	0.0621283	0.332051	0.739851	0.903494
TCONS_00007453	7901.94	0.0980857	0.0605315	1.62041	0.105145	0.361737
TCONS_00009565	7890.87	0.156246	0.0587411	2.65991	0.00781613	0.0673825
TCONS_00001753	7885.17	0.0628479	0.0529833	1.18618	0.235549	0.554188
TCONS_00008479	7865.44	0.0693357	0.0580527	1.19436	0.232338	0.549823
TCONS_00000516	7857.17	-0.584457	0.0660936	-8.84288	9.32853e-19	1.15121e-16
TCONS_00010829	7855.77	0.0206623	0.0571044	0.361835	0.717476	0.890199
TCONS_00001774	7843.36	0.155593	0.064575	2.4095	0.0159744	0.110429
TCONS_00005294	7819.04	0.104829	0.0643812	1.62825	0.103471	0.358011
TCONS_00010052	7815.19	0.248021	0.0632123	3.92361	8.72317e-05	0.0018223
TCONS_00009826	7814.11	-0.115453	0.0685211	-1.68493	0.0920027	0.335214
TCONS_00000233	7802.62	0.00428648	0.0564589	0.0759221	0.939481	0.978999
TCONS_00000668	7794.17	-0.0831204	0.0598466	-1.38889	0.164866	0.463573
TCONS_00005476	7768.25	0.106463	0.063006	1.68973	0.0910804	0.3334
TCONS_00003271	7752.56	0.249444	0.0711776	3.50453	0.000457418	0.00734514
TCONS_00005927	7741.2	-0.0846423	0.133531	-0.63388	0.526159	0.791164
TCONS_00014295	7740.45	-0.103745	0.0715562	-1.44984	0.147104	0.434532
TCONS_00004045	7739.89	0.09145	0.0610684	1.4975	0.134263	0.414225
TCONS_00006421	7723.68	0.0961402	0.0565066	1.7014	0.0888686	0.329011
TCONS_00014071	7710.72	0.0985163	0.0649207	1.51749	0.129144	0.406614
TCONS_00007685	7701.45	0.093169	0.0610653	1.52573	0.127078	0.40403
TCONS_00004755	7680.17	0.0496355	0.0816477	0.607923	0.543239	0.80074
TCONS_00002480	7678.87	0.169776	0.0687712	2.4687	0.0135605	0.098978
TCONS_00010283	7674.02	-0.0510656	0.0521358	-0.979472	0.327347	0.645255
TCONS_00000556	7664.14	-0.591713	0.0672689	-8.79624	1.41471e-18	1.6835e-16
TCONS_00006312	7641	-0.0341206	0.0622143	-0.548437	0.583392	0.818966
TCONS_00003263	7639.8	0.0590209	0.054267	1.0876	0.27677	0.595928
TCONS_00002110	7630.81	0.0886665	0.0558473	1.58766	0.112363	0.376087
TCONS_00006296	7627.39	0.0886447	0.0747865	1.1853	0.235897	0.554188
TCONS_00002663	7602.05	0.0159644	0.0811322	0.19677	0.844007	0.946879
TCONS_00002735	7586.76	-0.00383367	0.0566343	-0.0676916	0.946031	0.979295
TCONS_00000028	7568.7	0.0607787	0.0610853	0.99498	0.319746	0.637814
TCONS_00007793	7553.05	0.0377641	0.0543499	0.694833	0.48716	0.768249
TCONS_00005604	7541.91	0.00880415	0.0555594	0.158464	0.874091	0.955066
TCONS_00010063	7529	0.183219	0.0597826	3.06475	0.00217849	0.0259704
TCONS_00004968	7517.93	-0.0889349	0.0546098	-1.62855	0.103408	0.358011
TCONS_00014561	7501.29	-0.0494189	0.0749363	-0.659479	0.509588	0.781384
TCONS_00006463	7500.21	0.0270809	0.0580335	0.466643	0.640756	0.851022
TCONS_00003146	7478.85	-0.0603063	0.0761688	-0.791745	0.428509	0.726612
TCONS_00008147	7471.85	-0.0166195	0.0760163	-0.21863	0.826938	0.940235
TCONS_00005382	7468.88	-0.00581785	0.068989	-0.0843301	0.932794	0.976511
TCONS_00010100	7464.36	-0.0308794	0.0617262	-0.500264	0.616889	0.837976
TCONS_00001305	7421.21	-0.0324072	0.055508	-0.583829	0.559335	0.807323
TCONS_00004746	7415.2	0.101437	0.0620004	1.63606	0.101826	0.355458
TCONS_00007539	7400.4	-0.0529361	0.0743955	-0.71155	0.476744	0.762574
TCONS_00003238	7362.49	-0.183055	0.0706219	-2.59204	0.00954081	0.0779166
TCONS_00010307	7358.14	0.118552	0.0527356	2.24804	0.0245735	0.148398
TCONS_00000881	7341.54	-0.000107276	0.0616514	-0.00174004	0.998612	0.999332
TCONS_00002252	7338.46	0.12759	0.060479	2.10966	0.034888	0.185846
TCONS_00008186	7338.26	-0.0159676	0.0519944	-0.307102	0.758766	0.912017
TCONS_00004370	7320.57	0.11	0.0672924	1.63466	0.10212	0.355924
TCONS_00003037	7315.61	-0.00998732	0.055525	-0.179871	0.857254	0.950501
TCONS_00002320	7293.75	-0.214849	0.0566647	-3.79158	0.000149691	0.00289982
TCONS_00011429	7285.65	-0.0804423	0.0568005	-1.41623	0.15671	0.448408
TCONS_00007865	7281.59	0.0509391	0.0574349	0.886901	0.375132	0.684524
TCONS_00003236	7275.96	0.00640638	0.0587159	0.109108	0.913117	0.972314
TCONS_00011508	7274.18	-0.100136	0.0559	-1.79134	0.0732384	0.29558
TCONS_00009764	7256.27	-0.1173	0.0624445	-1.87846	0.060318	0.265949
TCONS_00002671	7250.48	0.0795446	0.0684788	1.16159	0.2454	0.564107
TCONS_00009576	7243.88	0.248196	0.0892072	2.78225	0.00539838	0.0522186
TCONS_00007058	7242.99	-0.183608	0.0729862	-2.51566	0.011881	0.0903827
TCONS_00007486	7241.46	0.104408	0.0640894	1.62911	0.103291	0.358004
TCONS_00009297	7229.52	-0.0345794	0.0635903	-0.543784	0.58659	0.820467
TCONS_00010588	7229.1	0.0359839	0.0564763	0.637151	0.524027	0.790637
TCONS_00003684	7229.09	-0.0507118	0.055396	-0.915441	0.35996	0.672491
TCONS_00000250	7207.41	0.0866979	0.0630739	1.37454	0.169273	0.47175
TCONS_00000210	7205	0.0325247	0.0551058	0.590223	0.555041	0.804436
TCONS_00008658	7196	-0.0256989	0.070751	-0.363231	0.716432	0.889567
TCONS_00004556	7178.9	0.261159	0.0586603	4.45206	8.50516e-06	0.000244303
TCONS_00002935	7172.02	-0.119307	0.0539309	-2.21222	0.0269516	0.15645
TCONS_00002967	7149.72	-0.077506	0.0731342	-1.05978	0.289246	0.610274
TCONS_00010193	7133.07	0.0996036	0.0565098	1.76259	0.0779696	0.305821
TCONS_00007841	7132.68	0.053016	0.0687629	0.770998	0.440708	0.735139
TCONS_00014517	7132.04	-0.462882	0.0741091	-6.24595	4.21226e-10	2.62341e-08
TCONS_00004177	7122.57	-0.0529698	0.0579528	-0.914017	0.360708	0.672634
TCONS_00006651	7110.33	0.0814186	0.060668	1.34204	0.179584	0.486088
TCONS_00012087	7108.39	0.0112841	0.0572069	0.197251	0.843631	0.946776
TCONS_00006295	7106.5	0.0369212	0.0537653	0.68671	0.492265	0.770422
TCONS_00013004	7103.62	-0.171094	0.0795782	-2.15001	0.0315547	0.175046
TCONS_00005965	7086.56	0.0163935	0.0525823	0.311768	0.755217	0.910743
TCONS_00005309	7053.54	-0.0316384	0.054988	-0.575369	0.565042	0.810993
TCONS_00009128	7048.32	0.0652871	0.0798944	0.817168	0.413833	0.714821
TCONS_00003095	7033.19	0.154776	0.0694078	2.22995	0.0257509	0.152131
TCONS_00008510	7033.12	0.145617	0.0657822	2.21362	0.0268549	0.156253
TCONS_00003695	6992.96	0.0761927	0.0565316	1.34779	0.177727	0.484603
TCONS_00000448	6991.92	0.12729	0.0556705	2.28649	0.0222255	0.139605
TCONS_00014293	6974.71	-0.115471	0.0651262	-1.77304	0.0762224	0.301631
TCONS_00002446	6967.95	-0.173952	0.067332	-2.5835	0.00978026	0.0795796
TCONS_00000222	6950.96	0.0674272	0.0549398	1.22729	0.219712	0.537975
TCONS_00011948	6943.61	-0.0383269	0.0836096	-0.458403	0.646663	0.853732
TCONS_00001769	6942.76	0.223284	0.0677281	3.29678	0.000978017	0.0135218
TCONS_00001401	6937.16	-0.12748	0.0545899	-2.33523	0.0195315	0.127731
TCONS_00012200	6893.45	0.184496	0.0666171	2.7695	0.00561429	0.0535245
TCONS_00003450	6874.54	-0.150253	0.0534099	-2.8132	0.00490512	0.0486425
TCONS_00001840	6850.86	-0.0593705	0.0553701	-1.07225	0.283608	0.604209
TCONS_00007312	6833.49	0.139423	0.0533371	2.61399	0.00894913	0.0741824
TCONS_00000603	6819.08	0.0146344	0.0563604	0.259656	0.795129	0.925449
TCONS_00002269	6802.91	0.0443084	0.0576408	0.768699	0.442072	0.736124
TCONS_00000847	6798.53	-0.311364	0.056433	-5.51741	3.44027e-08	1.59208e-06
TCONS_00005349	6792.57	0.135451	0.0629577	2.15146	0.0314399	0.174708
TCONS_00003189	6790.98	0.130921	0.0887519	1.47514	0.140175	0.425022
TCONS_00013296	6787.67	-0.00238067	0.0683768	-0.0348169	0.972226	0.990628
TCONS_00010285	6766.64	-0.0580334	0.0698345	-0.831013	0.405967	0.708254
TCONS_00006845	6748.73	0.0862715	0.0544401	1.5847	0.113034	0.377761
TCONS_00003718	6738.63	-0.00185448	0.0644388	-0.0287789	0.977041	0.991322
TCONS_00011005	6737.8	-0.100211	0.0547003	-1.83201	0.0669503	0.282452
TCONS_00009463	6706.2	-0.018916	0.0754321	-0.250769	0.801993	0.929202
TCONS_00001198	6688.29	0.0396329	0.0684856	0.578704	0.562789	0.809022
TCONS_00008669	6682.83	-0.0756117	0.0604998	-1.24978	0.211378	0.530225
TCONS_00003023	6682.38	0.191877	0.0683545	2.80708	0.00499922	0.0492384
TCONS_00005394	6642.25	0.160197	0.0609418	2.62869	0.00857144	0.0721213
TCONS_00011424	6639.87	-0.0570297	0.0693717	-0.822089	0.411026	0.712004
TCONS_00008806	6629.66	0.018627	0.0628194	0.296517	0.766835	0.915627
TCONS_00005999	6625.47	0.00457162	0.0648649	0.0704791	0.943812	0.979197
TCONS_00005993	6609.29	0.129205	0.056881	2.2715	0.0231167	0.142903
TCONS_00010564	6599.64	-0.190882	0.0557648	-3.42298	0.000619391	0.00929645
TCONS_00003257	6584.85	0.0129429	0.0584019	0.221617	0.824612	0.939718
TCONS_00010284	6546.73	-0.0456843	0.0528665	-0.864144	0.387509	0.694743
TCONS_00012665	6540.44	-0.0266958	0.0668107	-0.399573	0.689471	0.879019
TCONS_00003004	6522.41	0.0541915	0.0595189	0.910492	0.362563	0.674894
TCONS_00010275	6522.24	0.101165	0.0536056	1.88721	0.0591318	0.262004
TCONS_00001422	6520.43	-0.142169	0.0562917	-2.52558	0.0115509	0.0884851
TCONS_00007437	6497.14	0.181368	0.0710327	2.5533	0.0106708	0.0839555
TCONS_00008703	6490.27	0.130828	0.0572893	2.28364	0.0223926	0.13985
TCONS_00008238	6472.56	0.180788	0.068213	2.65034	0.00804111	0.0685369
TCONS_00001824	6471.74	-0.129761	0.0643109	-2.01771	0.0436211	0.217161
TCONS_00001201	6457.3	-0.0397179	0.057721	-0.688102	0.491389	0.769994
TCONS_00003871	6449.82	0.14282	0.0829819	1.7211	0.085232	0.320749
TCONS_00005459	6433.1	-0.253799	0.0686558	-3.69669	0.000218426	0.00407322
TCONS_00001241	6429.52	0.0126201	0.0651689	0.193652	0.846448	0.948341
TCONS_00005487	6411.76	0.143774	0.0542306	2.65116	0.00802161	0.0685333
TCONS_00008839	6397.71	-0.095771	0.0561498	-1.70563	0.0880762	0.326986
TCONS_00001102	6381.59	0.0822919	0.0538284	1.52878	0.126318	0.403112
TCONS_00011179	6373.64	0.105059	0.0580331	1.81033	0.0702444	0.288115
TCONS_00006357	6368.31	0.0396717	0.0574795	0.690188	0.490076	0.769521
TCONS_00011636	6360.03	-0.0555614	0.0662221	-0.839017	0.40146	0.705086
TCONS_00000067	6358.43	0.174901	0.0602902	2.90099	0.00371986	0.0396606
TCONS_00011241	6352.99	0.0284697	0.0579956	0.490895	0.623501	0.84148
TCONS_00002344	6335.05	0.0156309	0.0587328	0.266135	0.790135	0.92371
TCONS_00014330	6309.12	0.0422479	0.0840508	0.502648	0.615212	0.837976
TCONS_00013889	6308.18	-0.0732974	0.0622983	-1.17655	0.239373	0.557292
TCONS_00003431	6304.92	-0.0102259	0.055903	-0.182922	0.854859	0.950097
TCONS_00005629	6288.41	0.13566	0.0527576	2.57138	0.0101295	0.0814269
TCONS_00003478	6284.87	0.0561067	0.061674	0.909729	0.362965	0.675241
TCONS_00005796	6282.57	0.0792811	0.0546694	1.45019	0.147005	0.434532
TCONS_00011648	6280.92	0.114887	0.0540579	2.12526	0.0335649	0.182593
TCONS_00010033	6267.2	0.18682	0.0586912	3.1831	0.00145707	0.0190391
TCONS_00002954	6238.72	0.15943	0.0718692	2.21833	0.0265322	0.155369
TCONS_00011500	6232.32	-0.0671458	0.0535155	-1.2547	0.209589	0.527654
TCONS_00011746	6230.7	-0.0375751	0.0673247	-0.558117	0.576764	0.816215
TCONS_00001517	6208.55	0.112981	0.0562775	2.00758	0.0446882	0.220922
TCONS_00005834	6207.84	0.0401366	0.0654435	0.613302	0.539677	0.799295
TCONS_00013470	6202.15	0.120789	0.0557183	2.16784	0.0301706	0.169668
TCONS_00002877	6195.21	0.175898	0.0714664	2.46127	0.0138445	0.10072
TCONS_00007799	6194.55	-0.0367648	0.0610818	-0.601894	0.547245	0.801625
TCONS_00008411	6185.3	-0.0174164	0.0738217	-0.235925	0.813491	0.934498
TCONS_00007115	6178.12	0.103046	0.0732334	1.40708	0.159402	0.453762
TCONS_00002364	6175.06	-0.0769397	0.057115	-1.3471	0.177948	0.484809
TCONS_00008867	6114.28	-0.0130345	0.0592647	-0.219937	0.82592	0.939718
TCONS_00011656	6106.13	0.103836	0.0583054	1.78089	0.0749298	0.298644
TCONS_00003264	6083.15	0.231658	0.0604828	3.83015	0.000128065	0.00252492
TCONS_00000798	6079.59	-0.0313479	0.0536251	-0.584575	0.558833	0.807248
TCONS_00002664	6072.21	-0.0234719	0.0556899	-0.421475	0.673408	0.869072
TCONS_00012491	6069.56	-0.0379201	0.061672	-0.614867	0.538643	0.799295
TCONS_00006305	6051.79	0.286094	0.0557684	5.13003	2.8969e-07	1.10948e-05
TCONS_00011587	6023.03	0.00714556	0.0699971	0.102084	0.91869	0.973333
TCONS_00006409	6020.58	-0.783865	0.0589506	-13.297	2.41003e-40	6.1771e-38
TCONS_00011653	6014.74	0.103067	0.060103	1.71484	0.086375	0.32301
TCONS_00011857	6006	0.0347123	0.061109	0.568039	0.570009	0.814127
TCONS_00009811	6002.38	0.0568699	0.0569249	0.999034	0.317778	0.635315
TCONS_00002550	6000.24	-0.122386	0.0599862	-2.04024	0.0413266	0.208953
TCONS_00003009	5996.8	0.0332835	0.0715375	0.465259	0.641746	0.851572
TCONS_00008667	5996.79	-0.0245133	0.0673552	-0.363941	0.715902	0.889498
TCONS_00011909	5993.97	0.0851329	0.0587127	1.44999	0.147061	0.434532
TCONS_00007664	5988.6	0.167918	0.05547	3.02719	0.00246839	0.0287074
TCONS_00011820	5984.16	0.123986	0.055542	2.23229	0.0255957	0.151617
TCONS_00009123	5974.67	0.28874	0.0634829	4.54831	5.40778e-06	0.00016684
TCONS_00014880	5970.22	0.0463496	0.0625533	0.740962	0.458716	0.750525
TCONS_00005132	5956.33	0.105508	0.0578822	1.82281	0.0683323	0.284726
TCONS_00006422	5940.79	0.168953	0.0682141	2.4768	0.0132565	0.0976146
TCONS_00011171	5903.53	0.100827	0.059653	1.69023	0.0909835	0.3334
TCONS_00010341	5900.05	-0.0426757	0.0552388	-0.772568	0.439778	0.734507
TCONS_00005381	5899.54	0.060855	0.0728637	0.83519	0.403611	0.706505
TCONS_00004884	5894.47	0.0778839	0.0564349	1.38007	0.167566	0.469327
TCONS_00006720	5886.66	0.0663247	0.0555677	1.19358	0.232641	0.550149
TCONS_00001087	5885.88	0.0689676	0.0677258	1.01834	0.308518	0.628928
TCONS_00002314	5882.57	0.0330684	0.0566071	0.584174	0.559103	0.807248
TCONS_00009836	5876.89	0.00331202	0.0595533	0.0556144	0.955649	0.982797
TCONS_00008976	5859.88	-0.0246245	0.0575704	-0.427729	0.668848	0.865813
TCONS_00006816	5845.79	0.0320351	0.0630679	0.507946	0.611491	0.836198
TCONS_00008563	5834.23	0.00481623	0.0607958	0.0792198	0.936858	0.978187
TCONS_00005473	5828.06	0.00523394	0.0629991	0.0830797	0.933788	0.976733
TCONS_00010722	5826.79	-0.0508332	0.0621873	-0.817421	0.413688	0.714757
TCONS_00002513	5824.62	0.116016	0.0694553	1.67037	0.0948471	0.340184
TCONS_00008140	5814.9	-0.00800849	0.0722476	-0.110848	0.911737	0.971787
TCONS_00011010	5809.9	0.207493	0.0569531	3.64323	0.000269241	0.00481025
TCONS_00008085	5807.27	0.0849337	0.0732194	1.15999	0.246053	0.564512
TCONS_00010702	5805.34	-0.202059	0.0537118	-3.76191	0.000168623	0.00321979
TCONS_00002429	5787.54	-0.0702574	0.0579311	-1.21278	0.225216	0.542798
TCONS_00011276	5763.86	0.125423	0.0748922	1.67471	0.0939906	0.338386
TCONS_00005804	5758	0.186528	0.06967	2.6773	0.00742172	0.0645671
TCONS_00005174	5749.93	0.11666	0.0601576	1.93924	0.052472	0.242997
TCONS_00006440	5748.28	0.100323	0.0535777	1.87247	0.0611412	0.26755
TCONS_00008167	5744.58	0.0286489	0.0571281	0.501486	0.616029	0.837976
TCONS_00009872	5735.66	0.0875334	0.0694656	1.2601	0.207634	0.525114
TCONS_00010837	5727.37	0.0372946	0.0544067	0.685478	0.493042	0.770492
TCONS_00014136	5717.99	-0.00502286	0.0595433	-0.0843566	0.932773	0.976511
TCONS_00008348	5715.86	-0.0261085	0.0533048	-0.489797	0.624278	0.841632
TCONS_00007527	5712.9	-0.15022	0.0580517	-2.58769	0.00966227	0.0787156
TCONS_00000304	5706.17	-0.118464	0.0657457	-1.80186	0.0715677	0.291164
TCONS_00007309	5702.45	-0.0821156	0.0847748	-0.968632	0.332729	0.649431
TCONS_00007625	5691.98	0.0187203	0.0575169	0.325475	0.744822	0.905409
TCONS_00001258	5657.88	-0.000774	0.0606276	-0.0127665	0.989814	0.996282
TCONS_00004602	5650.35	0.117827	0.0585179	2.01351	0.0440606	0.218305
TCONS_00014032	5649.04	-0.00145308	0.0586352	-0.0247816	0.980229	0.992263
TCONS_00013302	5648.25	0.102954	0.066021	1.55942	0.118897	0.389543
TCONS_00008155	5641.02	-0.145382	0.0643498	-2.25925	0.0238677	0.146324
TCONS_00001622	5624.73	-0.0198848	0.054577	-0.364343	0.715602	0.889498
TCONS_00009383	5621.54	0.0679381	0.0621148	1.09375	0.274065	0.59144
TCONS_00013020	5619.28	-0.0326872	0.0560211	-0.583481	0.55957	0.807487
TCONS_00001175	5610.88	0.173867	0.0667139	2.60616	0.00915649	0.075239
TCONS_00005040	5601.98	-0.0171548	0.0616064	-0.278458	0.780661	0.919951
TCONS_00007578	5599.8	0.0729564	0.0559532	1.30388	0.192273	0.502672
TCONS_00007356	5598.17	0.0329814	0.0658106	0.501156	0.616261	0.837976
TCONS_00003796	5594.48	0.0706018	0.0669077	1.05521	0.291329	0.612925
TCONS_00009052	5585.8	0.21487	0.0701637	3.0624	0.00219568	0.0261285
TCONS_00010433	5580.71	0.225626	0.0558037	4.04322	5.27229e-05	0.001191
TCONS_00012835	5559.21	0.090754	0.069044	1.31444	0.188699	0.498683
TCONS_00009405	5556	0.201055	0.0708779	2.83664	0.00455913	0.0457561
TCONS_00011316	5554.65	0.0317599	0.0655892	0.484225	0.628226	0.843236
TCONS_00006668	5554.64	0.147387	0.0544401	2.70732	0.00678287	0.0607541
TCONS_00001384	5554.51	0.0725467	0.0605475	1.19818	0.230847	0.548778
TCONS_00000548	5552.53	0.228039	0.0597683	3.81538	0.000135973	0.00266506
TCONS_00003108	5550.13	-0.00123121	0.0599738	-0.0205292	0.983621	0.993911
TCONS_00005749	5541.04	0.0916212	0.0593094	1.5448	0.122395	0.396325
TCONS_00004716	5522.08	0.120404	0.057476	2.09486	0.0361836	0.190842
TCONS_00000641	5508.42	0.212091	0.0569528	3.72397	0.000196112	0.00369179
TCONS_00002612	5502.36	-0.152224	0.057403	-2.65184	0.00800546	0.0684832
TCONS_00004700	5468.57	0.0772344	0.0616705	1.25237	0.210434	0.528983
TCONS_00012612	5443.63	-0.104069	0.062026	-1.67782	0.093382	0.338205
TCONS_00000014	5442.95	-0.0589019	0.0642487	-0.91678	0.359258	0.672269
TCONS_00001788	5441.96	0.0998967	0.0702687	1.42164	0.155131	0.44541
TCONS_00012682	5438.82	-0.0202291	0.0756825	-0.267289	0.789247	0.923699
TCONS_00009566	5431.77	0.0310138	0.0608804	0.509422	0.610457	0.835679
TCONS_00000675	5428.79	0.187398	0.0601432	3.11586	0.00183409	0.0226941
TCONS_00000065	5428.33	0.0775789	0.0655293	1.18388	0.236461	0.555045
TCONS_00003097	5422.46	0.212794	0.0601917	3.53527	0.000407361	0.00671944
TCONS_00004217	5415	0.0565126	0.0673658	0.838891	0.401531	0.705086
TCONS_00006868	5409.91	0.0874505	0.0560639	1.55983	0.118799	0.389543
TCONS_00002463	5409.76	-0.271094	0.0673171	-4.02712	5.64638e-05	0.00125844
TCONS_00003032	5395.84	0.0340487	0.0549761	0.619336	0.535695	0.796444
TCONS_00004754	5369.23	0.123853	0.0573907	2.15807	0.0309222	0.172729
TCONS_00010059	5350.73	-0.174407	0.0716066	-2.43562	0.0148663	0.10528
TCONS_00012872	5350.37	0.121232	0.0655272	1.85011	0.0642983	0.276505
TCONS_00001247	5346.8	-0.0272956	0.064491	-0.423246	0.672116	0.868584
TCONS_00009632	5345.18	-0.136471	0.0704215	-1.93792	0.052633	0.243405
TCONS_00001350	5342.87	-0.109059	0.0666778	-1.63562	0.10192	0.355486
TCONS_00008894	5342.78	0.0596863	0.0598118	0.997902	0.318327	0.63589
TCONS_00009425	5313.19	0.123735	0.0562958	2.19795	0.0279528	0.160446
TCONS_00000607	5308.89	0.135778	0.0606506	2.23869	0.0251764	0.150508
TCONS_00003904	5304.87	-0.0584505	0.0579723	-1.00825	0.313335	0.632519
TCONS_00010008	5304.75	-0.238685	0.0581	-4.10817	3.98805e-05	0.000945779
TCONS_00005589	5279.93	-0.0357666	0.0599379	-0.596728	0.550689	0.802579
TCONS_00003294	5279.03	0.0968192	0.0592722	1.63347	0.10237	0.356052
TCONS_00001540	5277.91	0.117347	0.0753782	1.55677	0.119524	0.390829
TCONS_00008625	5259.75	0.0657956	0.0680887	0.966321	0.333883	0.649838
TCONS_00013996	5241.5	-0.151219	0.0680958	-2.22069	0.0263721	0.15484
TCONS_00007692	5237.64	-0.0174589	0.0652026	-0.267763	0.788881	0.923433
TCONS_00009827	5229.9	0.109173	0.0656099	1.66397	0.0961188	0.342214
TCONS_00004102	5228.88	0.105611	0.0677986	1.55772	0.119299	0.390285
TCONS_00006196	5215.79	-0.0024379	0.07526	-0.032393	0.974159	0.990726
TCONS_00014075	5208.74	-0.245814	0.0853207	-2.88106	0.00396344	0.0415943
TCONS_00001450	5185.31	0.167967	0.0738291	2.27508	0.0229008	0.141832
TCONS_00000626	5166.7	0.0419793	0.066104	0.635049	0.525397	0.791164
TCONS_00010465	5164.8	0.157265	0.0761597	2.06494	0.0389285	0.200169
TCONS_00013381	5155.48	0.116356	0.0584942	1.98919	0.0466807	0.227271
TCONS_00010215	5154.91	-0.0588991	0.0736508	-0.799707	0.42388	0.72355
TCONS_00000393	5153.78	0.131014	0.0910866	1.43835	0.150336	0.439277
TCONS_00007946	5135.53	0.0469071	0.0642881	0.729639	0.465611	0.754538
TCONS_00012645	5135.37	-0.319752	0.0648485	-4.93076	8.19105e-07	2.8729e-05
TCONS_00002277	5133.46	0.197522	0.0762407	2.59077	0.00957625	0.0781103
TCONS_00006468	5124.7	0.0893406	0.0614334	1.45427	0.145872	0.433583
TCONS_00006460	5082.07	0.131714	0.0661038	1.99252	0.0463136	0.226271
TCONS_00011814	5081.11	0.0340233	0.0636748	0.534329	0.593114	0.824491
TCONS_00001720	5060.89	0.21886	0.0628894	3.48007	0.000501281	0.0078316
TCONS_00007602	5050.6	-0.0223227	0.0657579	-0.339468	0.734258	0.901288
TCONS_00010679	5046.97	-0.262343	0.0584496	-4.48836	7.17737e-06	0.000216425
TCONS_00005767	5020.29	0.0309728	0.0550213	0.562924	0.573487	0.814349
TCONS_00002212	5006.28	-0.101863	0.0578741	-1.76008	0.078395	0.307247
TCONS_00002730	4990.49	0.114953	0.0862909	1.33216	0.182809	0.491028
TCONS_00011627	4988.54	-0.109331	0.0625057	-1.74913	0.0802684	0.310813
TCONS_00009028	4979.34	0.132179	0.0571373	2.31335	0.0207032	0.133172
TCONS_00014879	4976.73	0.0261147	0.0929862	0.280845	0.778829	0.919664
TCONS_00000608	4973.49	0.0186225	0.0627266	0.296883	0.766556	0.915627
TCONS_00007994	4954.6	0.0685361	0.0561515	1.22056	0.222254	0.54059
TCONS_00003147	4954.57	0.00969457	0.0877636	0.110462	0.912043	0.971787
TCONS_00006226	4944.72	-0.0353249	0.0611433	-0.577739	0.56344	0.809674
TCONS_00011097	4944.14	-0.0994938	0.0592055	-1.68048	0.0928638	0.337235
TCONS_00001461	4918.03	0.215546	0.0558855	3.85693	0.000114821	0.00228407
TCONS_00002053	4915.8	-0.0356395	0.0596014	-0.597964	0.549864	0.80232
TCONS_00006633	4914.41	-0.0972492	0.0565708	-1.71907	0.0856013	0.321718
TCONS_00000419	4913.79	0.230127	0.0726707	3.16672	0.00154171	0.0199495
TCONS_00009306	4911.51	0.230128	0.0566836	4.05986	4.91017e-05	0.00112445
TCONS_00014375	4889.76	0.0247312	0.0660673	0.374334	0.708156	0.887893
TCONS_00001339	4889.65	0.0136837	0.068446	0.19992	0.841543	0.946568
TCONS_00008342	4886.15	-0.120146	0.0605629	-1.98383	0.0472752	0.229288
TCONS_00008747	4884.08	0.180034	0.0614982	2.92748	0.00341726	0.0372102
TCONS_00012610	4870.26	0.391331	0.0727952	5.37578	7.62522e-08	3.29964e-06
TCONS_00014860	4850.28	-0.00657755	0.0811399	-0.0810643	0.935391	0.977642
TCONS_00003943	4849.2	0.0584483	0.0583222	1.00216	0.316265	0.634859
TCONS_00009770	4846.39	0.0805082	0.0661951	1.21622	0.223899	0.541978
TCONS_00012103	4840.34	-0.0677482	0.056068	-1.20832	0.226923	0.54514
TCONS_00009557	4836.97	0.224974	0.0655289	3.4332	0.000596501	0.0089934
TCONS_00000289	4831.61	0.0861761	0.0671093	1.28411	0.199102	0.512284
TCONS_00010363	4829.93	0.0886873	0.0562238	1.5774	0.114704	0.380909
TCONS_00000837	4827.72	0.1615	0.0573195	2.81754	0.00483925	0.0481325
TCONS_00002555	4819.23	-0.0378803	0.0582365	-0.650457	0.515397	0.784776
TCONS_00003013	4808.26	0.28113	0.0701211	4.00921	6.09232e-05	0.00133991
TCONS_00002643	4803.77	0.0470247	0.0617517	0.761513	0.446351	0.739538
TCONS_00008097	4796.04	0.0583425	0.0631083	0.924482	0.355235	0.669861
TCONS_00004609	4794.05	0.0120815	0.0583838	0.206932	0.836063	0.944294
TCONS_00003206	4790.84	-0.0819346	0.0684807	-1.19646	0.231516	0.548778
TCONS_00014135	4777.07	-0.00935649	0.0581276	-0.160965	0.872121	0.954496
TCONS_00008898	4764.77	0.0242449	0.0653885	0.370783	0.7108	0.8882
TCONS_00008467	4759.9	0.0302151	0.0699193	0.432142	0.665638	0.863839
TCONS_00003381	4759.46	-0.133318	0.0810643	-1.6446	0.100052	0.351725
TCONS_00007964	4746.02	0.12367	0.0624929	1.97894	0.0478226	0.231438
TCONS_00001496	4742.5	-0.112227	0.057649	-1.94673	0.0515672	0.241154
TCONS_00011115	4740.12	-0.0199883	0.0633332	-0.315606	0.752302	0.90913
TCONS_00014023	4740.01	0.131515	0.0675491	1.94695	0.0515412	0.241154
TCONS_00009443	4730.22	0.0729954	0.0635573	1.1485	0.250764	0.569104
TCONS_00000118	4725.36	0.10096	0.0571358	1.76702	0.0772256	0.303797
TCONS_00004661	4722.63	-0.0744308	0.0613536	-1.21315	0.225074	0.542798
TCONS_00009634	4721.56	0.00585311	0.0697257	0.0839448	0.9331	0.976606
TCONS_00000547	4721.46	-0.0892905	0.0590237	-1.51279	0.130333	0.409023
TCONS_00009224	4685.56	0.137113	0.0730163	1.87784	0.0604027	0.265949
TCONS_00002017	4680.73	0.099613	0.0645655	1.54282	0.122874	0.397313
TCONS_00001844	4677.71	-0.0224764	0.0560475	-0.401024	0.688402	0.878329
TCONS_00013133	4677.61	-0.375114	0.0654066	-5.73511	9.74491e-09	5.03411e-07
TCONS_00005970	4676.48	-0.02868	0.0755857	-0.379437	0.704364	0.885805
TCONS_00007604	4667.61	0.0518677	0.063256	0.819965	0.412236	0.713358
TCONS_00004039	4661.1	0.0357658	0.0594606	0.601505	0.547504	0.801625
TCONS_00007372	4641.12	0.11422	0.0681348	1.67639	0.0936622	0.338301
TCONS_00011148	4641.04	-0.048672	0.0585772	-0.830903	0.406028	0.708254
TCONS_00001009	4634.66	-0.00918156	0.0636143	-0.144332	0.885238	0.961413
TCONS_00000872	4629.59	-0.00351204	0.0602691	-0.0582726	0.953531	0.981918
TCONS_00008645	4625.89	0.0486355	0.0723675	0.672062	0.501544	0.775114
TCONS_00000269	4624.4	0.13204	0.0745463	1.77125	0.0765187	0.302086
TCONS_00009454	4623.3	-0.00640616	0.07112	-0.0900754	0.928227	0.975048
TCONS_00003595	4609.23	0.0113313	0.0603567	0.187739	0.851082	0.949352
TCONS_00001928	4608.01	-0.0821126	0.0552363	-1.48657	0.137129	0.419957
TCONS_00011302	4607.58	-0.0165015	0.0780284	-0.21148	0.832512	0.942232
TCONS_00000596	4604.82	0.126172	0.0580732	2.17263	0.0298079	0.168339
TCONS_00001730	4604.04	0.0228211	0.070432	0.324016	0.745926	0.906263
TCONS_00008759	4603.76	-0.114704	0.0666476	-1.72105	0.0852412	0.320749
TCONS_00003950	4591.51	0.0414495	0.0580733	0.713744	0.475386	0.761898
TCONS_00000004	4584.36	-0.0742619	0.0596677	-1.24459	0.213282	0.531807
TCONS_00012977	4584.2	-0.0224801	0.0622749	-0.360981	0.718113	0.89027
TCONS_00007077	4574.31	-0.0100543	0.0644109	-0.156096	0.875957	0.955712
TCONS_00001975	4567	0.109177	0.0584717	1.86717	0.0618776	0.269481
TCONS_00013992	4566.81	-0.147717	0.0632272	-2.33629	0.0194763	0.127495
TCONS_00014417	4563.99	-0.130867	0.0613155	-2.13432	0.0328165	0.179845
TCONS_00007264	4559.25	-0.0166647	0.0617386	-0.269923	0.787219	0.922677
TCONS_00012551	4558.28	0.0405219	0.0697622	0.580858	0.561336	0.80846
TCONS_00004475	4555.31	-0.00247685	0.0631928	-0.0391951	0.968735	0.98922
TCONS_00005784	4550.67	-0.0807481	0.0664041	-1.21601	0.223981	0.541979
TCONS_00001010	4526.77	0.0360059	0.065806	0.547153	0.584274	0.81907
TCONS_00006697	4519.6	0.0165824	0.0571672	0.290069	0.771763	0.917961
TCONS_00014564	4515.03	-0.0365869	0.0575698	-0.635522	0.525088	0.791135
TCONS_00001193	4510.49	-0.0649028	0.0609332	-1.06515	0.286809	0.607339
TCONS_00005595	4503.81	-0.150881	0.0640485	-2.35573	0.0184861	0.123069
TCONS_00000013	4500.9	0.00122975	0.0602159	0.0204224	0.983706	0.993911
TCONS_00012606	4495.07	0.0622235	0.0621434	1.00129	0.316687	0.634859
TCONS_00009222	4492.76	0.0920094	0.0605702	1.51905	0.128749	0.406053
TCONS_00006390	4474.9	-0.0328288	0.0729603	-0.449955	0.652743	0.857506
TCONS_00007523	4463.91	0.0442994	0.0638445	0.693864	0.487768	0.768436
TCONS_00010177	4462.89	0.0791219	0.0885662	0.893364	0.371662	0.681363
TCONS_00001151	4462.32	-0.0819779	0.0620695	-1.32074	0.186586	0.496174
TCONS_00003243	4459.4	0.0728355	0.0859758	0.847162	0.396905	0.70149
TCONS_00008052	4456.43	0.0519238	0.0826354	0.628348	0.529776	0.792286
TCONS_00004604	4456.07	0.0924045	0.0606235	1.52424	0.12745	0.40463
TCONS_00004642	4438.53	-0.0475154	0.0703066	-0.675831	0.499148	0.774103
TCONS_00005200	4438.35	-0.0349591	0.08644	-0.404433	0.685895	0.876808
TCONS_00004561	4430.92	0.0753419	0.0744002	1.01266	0.311224	0.631127
TCONS_00011464	4428.84	-0.155746	0.0614202	-2.53574	0.0112211	0.086648
TCONS_00001709	4420.76	0.0173672	0.0762132	0.227877	0.819742	0.936705
TCONS_00010621	4420.44	-0.200495	0.0894106	-2.24241	0.0249348	0.149969
TCONS_00003622	4413.55	-0.0266826	0.0818262	-0.326088	0.744358	0.905182
TCONS_00006632	4409.87	0.000776642	0.0629242	0.0123425	0.990152	0.996282
TCONS_00002069	4387.58	-0.298761	0.0638578	-4.67853	2.88933e-06	9.25698e-05
TCONS_00002336	4383.39	-0.0265941	0.065675	-0.404934	0.685526	0.876673
TCONS_00005673	4379.88	-0.038052	0.0777496	-0.489417	0.624546	0.841711
TCONS_00008474	4367.56	-0.120915	0.0836082	-1.44621	0.148119	0.435756
TCONS_00006450	4361	-0.316348	0.0628313	-5.03489	4.78131e-07	1.78004e-05
TCONS_00005035	4360.26	0.124329	0.061042	2.03678	0.041672	0.210221
TCONS_00004194	4355.11	0.0743821	0.0631969	1.17699	0.239199	0.557292
TCONS_00004366	4347.02	0.136341	0.0814809	1.67329	0.0942697	0.339025
TCONS_00000698	4334.8	0.055469	0.0743235	0.746319	0.455475	0.746871
TCONS_00007596	4305.99	0.101407	0.0648482	1.56376	0.117874	0.387716
TCONS_00013124	4296.67	0.0584444	0.0569342	1.02653	0.304644	0.624442
TCONS_00004042	4296.06	0.0450614	0.067361	0.668953	0.503525	0.776869
TCONS_00001985	4289.19	0.0186805	0.0577947	0.323222	0.746527	0.906498
TCONS_00010532	4288.72	0.0994603	0.0611588	1.62626	0.103894	0.358543
TCONS_00013904	4285.18	0.0827195	0.0612896	1.34965	0.177129	0.484245
TCONS_00006817	4280.11	0.053604	0.0695045	0.771231	0.44057	0.735092
TCONS_00007204	4279.47	-0.0717582	0.0860564	-0.833851	0.404365	0.707134
TCONS_00006935	4275.55	-0.0155186	0.0625525	-0.248089	0.804066	0.929959
TCONS_00009442	4268.74	0.041558	0.0654818	0.63465	0.525657	0.791164
TCONS_00005228	4266.42	0.043169	0.0831388	0.51924	0.603593	0.832439
TCONS_00009598	4257.57	0.114752	0.061462	1.86704	0.0618966	0.269481
TCONS_00001089	4257.29	-0.145656	0.0629214	-2.31489	0.0206191	0.132759
TCONS_00000505	4252.57	-0.0578761	0.0841148	-0.688061	0.491414	0.769994
TCONS_00012500	4239.47	-0.0879482	0.0610046	-1.44167	0.149397	0.43781
TCONS_00009873	4237.65	0.160188	0.128438	1.2472	0.212323	0.531061
TCONS_00009309	4215.21	-0.124259	0.0599464	-2.07284	0.038187	0.197423
TCONS_00001700	4215.17	-0.0716	0.0620145	-1.15457	0.248267	0.566451
TCONS_00000821	4203.34	-0.223282	0.0766649	-2.91244	0.00358614	0.0387327
TCONS_00008198	4196.96	-0.17216	0.057741	-2.98159	0.00286752	0.032279
TCONS_00003961	4193.46	0.0299889	0.0680514	0.440679	0.659445	0.860404
TCONS_00002339	4179.73	0.101671	0.0673504	1.50959	0.131148	0.40993
TCONS_00008354	4174.22	0.150205	0.0657945	2.28294	0.022434	0.13985
TCONS_00012455	4171.91	-0.0146535	0.0631044	-0.232211	0.816374	0.936211
TCONS_00008889	4168.96	0.101986	0.0641028	1.59098	0.111614	0.374715
TCONS_00012589	4165.09	-0.536608	0.0834967	-6.42669	1.30413e-10	8.52029e-09
TCONS_00000609	4158.55	0.040535	0.0693698	0.584332	0.558997	0.807248
TCONS_00005509	4153.88	-0.119564	0.0617771	-1.93542	0.0529392	0.244143
TCONS_00008030	4148.16	0.151155	0.05944	2.54298	0.0109912	0.0857675
TCONS_00011139	4146.9	0.082159	0.0628964	1.30626	0.191464	0.501738
TCONS_00006287	4143.38	0.12544	0.0618678	2.02755	0.0426066	0.214177
TCONS_00004660	4139.11	0.0170712	0.0586431	0.291104	0.770972	0.917633
TCONS_00001608	4136.88	-0.0421662	0.0583221	-0.722989	0.469687	0.757784
TCONS_00008761	4135.53	0.021971	0.0624481	0.351827	0.724968	0.894664
TCONS_00008995	4126.06	0.077412	0.0643461	1.20306	0.228955	0.546465
TCONS_00007969	4124.72	-0.0744287	0.0644116	-1.15552	0.247879	0.566451
TCONS_00012154	4123.3	-0.0922353	0.0595469	-1.54895	0.121393	0.394039
TCONS_00000327	4122.28	0.0520698	0.0570408	0.912852	0.36132	0.672957
TCONS_00011705	4120.7	0.0909307	0.0604489	1.50426	0.132515	0.411885
TCONS_00008967	4115.4	0.161347	0.0617062	2.61476	0.0089291	0.0741824
TCONS_00001499	4113.76	-0.115683	0.0606282	-1.90807	0.0563815	0.253698
TCONS_00005517	4108.66	0.0359381	0.0720593	0.49873	0.61797	0.838557
TCONS_00000919	4078.9	0.0658853	0.0604084	1.09066	0.275421	0.593597
TCONS_00004457	4076.44	0.144401	0.0644791	2.2395	0.0251232	0.150508
TCONS_00013802	4074.81	-0.0452583	0.0660825	-0.684876	0.493422	0.770492
TCONS_00009107	4071.35	0.119303	0.0704669	1.69304	0.0904483	0.332284
TCONS_00011905	4071.15	-0.277661	0.136718	-2.0309	0.0422647	0.212889
TCONS_00012518	4069	-0.0972702	0.0601182	-1.61798	0.105666	0.363343
TCONS_00000618	4046.02	0.0502503	0.0772638	0.650373	0.515451	0.784776
TCONS_00003120	4041.41	0.247898	0.0754871	3.28399	0.0010235	0.0140342
TCONS_00000392	4034.68	-0.0946479	0.061717	-1.53358	0.125133	0.401486
TCONS_00011122	4033.39	0.0773746	0.0562269	1.37611	0.168786	0.471215
TCONS_00000893	4032.73	0.0244332	0.0625832	0.390412	0.696232	0.882104
TCONS_00009241	4030.96	0.0206389	0.073655	0.28021	0.779316	0.919692
TCONS_00004629	4028.42	-0.0417478	0.08056	-0.518221	0.604304	0.8327
TCONS_00001708	4026.7	0.0534142	0.056669	0.942564	0.345904	0.662983
TCONS_00008602	4015.25	-1.66689	0.0650124	-25.6396	5.51918e-145	7.35597e-142
TCONS_00001231	4004.3	-0.0329297	0.0633101	-0.520134	0.60297	0.832439
TCONS_00007368	3982.99	0.258085	0.0776691	3.32289	0.000890916	0.0124728
TCONS_00000694	3973.09	0.0154738	0.0642866	0.2407	0.809787	0.932186
TCONS_00006046	3963.05	-0.0274758	0.0576491	-0.476604	0.633644	0.847054
TCONS_00008065	3958.66	0.0272566	0.0681629	0.399874	0.689249	0.878905
TCONS_00006160	3947.44	0.0220169	0.0653132	0.337097	0.736043	0.90226
TCONS_00007099	3943.66	0.11725	0.0612861	1.91316	0.0557277	0.251435
TCONS_00007556	3931.54	0.0762903	0.0621656	1.22721	0.219743	0.537975
TCONS_00001285	3925.26	0.191135	0.0636172	3.00446	0.00266056	0.0304116
TCONS_00003245	3920.58	0.0096491	0.0695462	0.138744	0.889653	0.963381
TCONS_00006503	3919.93	-0.0365043	0.0603638	-0.604738	0.545353	0.80162
TCONS_00000943	3912.57	0.0436213	0.0659452	0.661477	0.508306	0.780137
TCONS_00004950	3906.12	0.177861	0.0697258	2.55086	0.0107459	0.0843467
TCONS_00013397	3904.21	-0.0675813	0.0622406	-1.08581	0.277564	0.596733
TCONS_00013805	3903.01	0.000750349	0.0605105	0.0124003	0.990106	0.996282
TCONS_00001130	3894.59	0.206082	0.0677937	3.03984	0.00236701	0.0277707
TCONS_00007363	3887.96	0.149318	0.0772246	1.93355	0.0531683	0.244892
TCONS_00009586	3878.73	0.260272	0.0593892	4.38247	1.17339e-05	0.000320734
TCONS_00011266	3871.82	-0.0942819	0.0597947	-1.57676	0.114851	0.381159
TCONS_00006966	3870.87	-0.301876	0.0728236	-4.1453	3.39362e-05	0.000813492
TCONS_00007639	3869.94	-0.0411741	0.0710405	-0.579586	0.562194	0.809022
TCONS_00010488	3860.29	0.0518221	0.0624338	0.830034	0.40652	0.708618
TCONS_00005241	3858.06	-0.0286996	0.0587369	-0.488613	0.625116	0.84208
TCONS_00013784	3852.08	0.0261319	0.0821522	0.318091	0.750416	0.908701
TCONS_00003749	3849.91	0.136646	0.0837988	1.63064	0.102966	0.357752
TCONS_00007921	3835.62	0.105307	0.0587938	1.79112	0.073274	0.29558
TCONS_00011910	3834.89	-0.0398464	0.134745	-0.295716	0.767447	0.915627
TCONS_00007601	3832.89	-4.1085	0.0750574	-54.7381	0	0
TCONS_00001237	3824.47	0.0172778	0.0654988	0.263788	0.791943	0.924419
TCONS_00004230	3824.18	0.0635463	0.0723382	0.878461	0.379694	0.68904
TCONS_00008768	3819.18	-0.0215181	0.0701615	-0.306694	0.759077	0.912017
TCONS_00005644	3815.75	0.210646	0.0600203	3.50957	0.000448825	0.00727466
TCONS_00013448	3814.47	0.356562	0.0714738	4.98871	6.07853e-07	2.21352e-05
TCONS_00014787	3812.58	0.329412	0.0710565	4.63592	3.55355e-06	0.000112232
TCONS_00011714	3810.56	-0.0652754	0.065453	-0.997288	0.318625	0.636295
TCONS_00008670	3808.77	-0.142035	0.0856243	-1.65882	0.0971521	0.344557
TCONS_00002161	3805.3	0.0917695	0.0792686	1.1577	0.246985	0.56562
TCONS_00003611	3793.02	-0.0456277	0.0706647	-0.645693	0.518478	0.787586
TCONS_00000678	3790.28	0.202793	0.0737187	2.75091	0.00594301	0.0557021
TCONS_00001594	3790.03	0.0902093	0.0611425	1.47539	0.140106	0.425022
TCONS_00000231	3785.96	0.125991	0.0586572	2.14792	0.0317199	0.175521
TCONS_00010921	3784.1	-0.0349962	0.059886	-0.584381	0.558964	0.807248
TCONS_00014187	3783.56	-0.0142748	0.0627872	-0.227353	0.82015	0.936705
TCONS_00006574	3782.59	0.110319	0.0592753	1.86113	0.0627254	0.272468
TCONS_00011106	3780.16	0.165242	0.08851	1.86693	0.061911	0.269481
TCONS_00002551	3778.97	-0.0107785	0.0664609	-0.162178	0.871166	0.954241
TCONS_00006851	3778.64	0.161941	0.0613794	2.63836	0.00833071	0.0704516
TCONS_00009314	3777.58	-0.0865819	0.0661885	-1.30811	0.190836	0.500878
TCONS_00006520	3776.4	0.0660859	0.0634376	1.04175	0.297529	0.618342
TCONS_00002984	3776.17	0.339528	0.0685369	4.95395	7.27226e-07	2.6055e-05
TCONS_00005365	3774.68	0.212258	0.0673734	3.15046	0.00163012	0.0208106
TCONS_00000856	3769.79	0.0323591	0.0587787	0.550524	0.58196	0.81836
TCONS_00005628	3767.7	0.0788937	0.0671355	1.17514	0.239938	0.557901
TCONS_00006386	3765.58	0.121902	0.0619855	1.96662	0.049227	0.234656
TCONS_00003309	3747.17	-0.212797	0.0606749	-3.50716	0.000452916	0.00730806
TCONS_00004720	3742.32	0.0562811	0.0711616	0.790892	0.429007	0.727087
TCONS_00007042	3740.68	0.0115408	0.0610094	0.189164	0.849964	0.949352
TCONS_00008410	3737.13	0.287878	0.0823594	3.49538	0.000473383	0.00752893
TCONS_00006008	3732.23	0.0511131	0.0784953	0.651161	0.514943	0.784765
TCONS_00010815	3731.25	-0.0129675	0.0715788	-0.181165	0.856238	0.950178
TCONS_00009709	3731.09	0.0878716	0.0582235	1.50921	0.131245	0.410039
TCONS_00010182	3727.4	0.00647027	0.0703968	0.0919115	0.926768	0.974135
TCONS_00010453	3726.95	0.0289842	0.0585814	0.494768	0.620764	0.839508
TCONS_00013967	3725.12	-0.12234	0.0815158	-1.50081	0.133405	0.413448
TCONS_00011616	3722.76	0.0504477	0.0704288	0.716293	0.47381	0.760623
TCONS_00003265	3710.53	0.0325751	0.0654935	0.49738	0.618921	0.8388
TCONS_00008621	3702.86	0.0494668	0.0711423	0.695322	0.486854	0.768249
TCONS_00011120	3702.38	-0.00567502	0.0648438	-0.0875184	0.930259	0.976002
TCONS_00008214	3701.25	0.160978	0.0736028	2.18712	0.0287338	0.16394
TCONS_00011463	3701.13	-0.167465	0.0670207	-2.49871	0.0124646	0.0937766
TCONS_00014303	3700.5	0.0833081	0.080024	1.04104	0.297857	0.618342
TCONS_00000246	3694.53	-0.133166	0.0709701	-1.87637	0.0606049	0.26623
TCONS_00011256	3687.96	0.165904	0.0608129	2.72811	0.00636983	0.0583886
TCONS_00004007	3687.02	0.0476582	0.0802463	0.593899	0.55258	0.803127
TCONS_00006727	3685.33	-0.0219847	0.0628802	-0.349629	0.726617	0.895704
TCONS_00004489	3684.94	0.0413517	0.0583998	0.708079	0.478896	0.763484
TCONS_00003699	3684.3	0.0861382	0.0603907	1.42635	0.153768	0.44402
TCONS_00008409	3681.53	0.0259452	0.0660997	0.392517	0.694676	0.881835
TCONS_00000839	3678.12	0.184939	0.0645803	2.86371	0.00418712	0.0429938
TCONS_00003219	3672.67	-0.198177	0.0687568	-2.88229	0.00394797	0.0414973
TCONS_00011029	3672.43	-0.320702	0.0760958	-4.21445	2.5039e-05	0.000622611
TCONS_00007051	3668.79	0.124648	0.0645671	1.93052	0.0535429	0.245399
TCONS_00007656	3662.03	0.0217449	0.0665491	0.326749	0.743857	0.905182
TCONS_00012187	3661.69	-0.0319367	0.065847	-0.485014	0.627666	0.843235
TCONS_00012863	3656.5	0.053705	0.0610081	0.880293	0.3787	0.688255
TCONS_00012935	3630.42	-0.0713356	0.0702301	-1.01574	0.309753	0.629711
TCONS_00000917	3627.19	-0.107855	0.0661964	-1.62932	0.103244	0.358004
TCONS_00007895	3625.64	-0.107517	0.0729352	-1.47415	0.140441	0.425022
TCONS_00008116	3623.5	-0.0413474	0.0593459	-0.696719	0.485979	0.768249
TCONS_00006350	3623.34	-0.0184671	0.0593533	-0.311139	0.755695	0.910989
TCONS_00003384	3620.85	0.0956094	0.0820636	1.16506	0.243993	0.562424
TCONS_00007079	3587.74	0.0982354	0.0629777	1.55985	0.118796	0.389543
TCONS_00000912	3587.66	0.0523076	0.0628071	0.832829	0.404941	0.707725
TCONS_00000225	3582.79	0.0803268	0.0682526	1.1769	0.239234	0.557292
TCONS_00011394	3582.09	-0.0769745	0.0798541	-0.963939	0.335077	0.651576
TCONS_00005905	3579.73	-0.00570454	0.0772839	-0.0738128	0.941159	0.979086
TCONS_00004637	3576.91	-0.154249	0.059152	-2.60767	0.00911603	0.074999
TCONS_00002775	3575.02	-0.0703789	0.0622831	-1.12998	0.258483	0.577218
TCONS_00006009	3573.69	0.0993633	0.0656948	1.5125	0.130407	0.409023
TCONS_00009122	3569.13	-0.0046156	0.0603149	-0.0765252	0.939001	0.978806
TCONS_00008445	3561.26	0.117906	0.0610739	1.93055	0.0535384	0.245399
TCONS_00010953	3557.54	-0.210451	0.0611619	-3.44088	0.000579823	0.00883119
TCONS_00002785	3555.78	-0.0557624	0.0619103	-0.900696	0.36775	0.678028
TCONS_00004446	3555.56	-0.0433979	0.0769198	-0.564196	0.572621	0.814349
TCONS_00013840	3552.34	-0.146201	0.0758543	-1.92739	0.0539306	0.24616
TCONS_00012765	3549.67	0.00348231	0.0661214	0.0526653	0.957999	0.984138
TCONS_00007381	3542.22	0.159476	0.0644326	2.47508	0.0133206	0.0978704
TCONS_00000268	3541.7	-0.0371887	0.0605294	-0.614392	0.538957	0.799295
TCONS_00006012	3540.06	0.0418296	0.0600485	0.696596	0.486055	0.768249
TCONS_00005114	3532.95	-0.0102355	0.0791568	-0.129306	0.897115	0.96597
TCONS_00003293	3531.46	-0.185561	0.0895921	-2.07118	0.038342	0.198071
TCONS_00004951	3531.34	0.081477	0.0679902	1.19836	0.230775	0.548778
TCONS_00007231	3527.98	0.122342	0.0618137	1.9792	0.0477935	0.231438
TCONS_00011015	3526.99	0.292448	0.0608058	4.80955	1.51274e-06	5.11721e-05
TCONS_00008782	3526.06	-0.0119843	0.0734501	-0.163163	0.87039	0.954241
TCONS_00005594	3523.39	-0.108464	0.138567	-0.782757	0.43377	0.729893
TCONS_00008793	3521.88	-0.00671909	0.0599715	-0.112038	0.910793	0.971435
TCONS_00009316	3512.23	-0.124774	0.0624489	-1.99801	0.0457153	0.224666
TCONS_00007920	3507.15	-0.188065	0.0625013	-3.00897	0.00262135	0.0300666
TCONS_00005512	3506.11	0.14099	0.0655402	2.15121	0.03146	0.174708
TCONS_00008272	3484.27	-0.0905291	0.064415	-1.4054	0.159901	0.4546
TCONS_00003848	3478.99	0.0571744	0.0603608	0.947212	0.343531	0.66069
TCONS_00005870	3476.01	-0.118203	0.0679185	-1.74036	0.0817956	0.312729
TCONS_00010096	3462.74	-0.131479	0.0667366	-1.97012	0.0488248	0.23387
TCONS_00000087	3461.56	-0.0186912	0.0659141	-0.283569	0.776741	0.91956
TCONS_00005383	3460.77	0.171009	0.0949862	1.80035	0.0718051	0.291952
TCONS_00003098	3457.57	0.0853927	0.0684419	1.24767	0.212153	0.530901
TCONS_00008873	3454.43	0.0699174	0.0825166	0.847313	0.396821	0.70149
TCONS_00007084	3449.13	0.0561523	0.0608905	0.922185	0.356432	0.670149
TCONS_00009300	3446.69	0.113866	0.0624264	1.82401	0.0681511	0.284726
TCONS_00006105	3438.44	-0.0681541	0.0588637	-1.15783	0.246934	0.56562
TCONS_00008248	3437.27	0.0182546	0.0747265	0.244286	0.807009	0.931693
TCONS_00014791	3432.58	0.0110778	0.0596522	0.185706	0.852675	0.949352
TCONS_00007374	3427.54	-0.283961	0.064847	-4.37894	1.19259e-05	0.000324385
TCONS_00006777	3423.14	-0.0890824	0.0593714	-1.50043	0.133504	0.413448
TCONS_00001931	3420.81	0.0548562	0.0702871	0.780459	0.435121	0.731126
TCONS_00000328	3411.66	0.0526054	0.0589315	0.892653	0.372043	0.681687
TCONS_00012021	3411.58	-0.288117	0.0646585	-4.45598	8.35125e-06	0.000243147
TCONS_00004796	3410.03	0.0714404	0.0827694	0.863125	0.388069	0.695545
TCONS_00006671	3408.84	0.177839	0.0680054	2.61507	0.00892086	0.0741824
TCONS_00011675	3407.96	-0.140975	0.0722008	-1.95255	0.0508735	0.239898
TCONS_00013115	3403.26	0.147683	0.0759186	1.94528	0.0517408	0.241506
TCONS_00000964	3393.54	0.0304195	0.0628289	0.484165	0.628269	0.843236
TCONS_00003990	3377.95	-0.0503251	0.0617387	-0.815131	0.414997	0.716276
TCONS_00001433	3375.89	-0.00550187	0.0622588	-0.088371	0.929582	0.975586
TCONS_00009059	3374.49	-0.0171519	0.077925	-0.220108	0.825787	0.939718
TCONS_00003845	3365.53	0.0350353	0.0649028	0.539811	0.589327	0.822052
TCONS_00010065	3358.68	-0.0250027	0.0672334	-0.371879	0.709983	0.888178
TCONS_00011013	3354.46	0.0966363	0.0624932	1.54635	0.12202	0.395305
TCONS_00006708	3351.86	0.0200511	0.059961	0.334402	0.738076	0.902529
TCONS_00011441	3350.74	0.0882936	0.065934	1.33912	0.180532	0.487465
TCONS_00008991	3336.93	-0.00163957	0.0620222	-0.0264352	0.97891	0.991859
TCONS_00010509	3335.25	0.0642455	0.0677429	0.948371	0.342941	0.660317
TCONS_00006428	3323.08	-0.0303586	0.0723071	-0.419857	0.67459	0.86953
TCONS_00013139	3320.46	0.0479027	0.0731346	0.654994	0.512471	0.784079
TCONS_00005315	3316.03	0.0665898	0.0600032	1.10977	0.267098	0.584784
TCONS_00008376	3307.64	0.177718	0.0755765	2.35151	0.0186976	0.12409
TCONS_00006117	3301.89	0.0228785	0.0648743	0.352658	0.724344	0.89406
TCONS_00001134	3301.36	0.0206952	0.0736408	0.281029	0.778688	0.919664
TCONS_00011680	3295.13	-0.0219548	0.0766309	-0.286501	0.774494	0.918662
TCONS_00012505	3292.88	0.342157	0.0677438	5.05074	4.40098e-07	1.65696e-05
TCONS_00009501	3289.18	-0.158707	0.0660316	-2.40351	0.0162387	0.112024
TCONS_00005841	3284.75	-0.144386	0.0679847	-2.12381	0.0336863	0.182999
TCONS_00013242	3280.05	-0.00396186	0.0681287	-0.0581527	0.953627	0.981918
TCONS_00004617	3273.67	0.192604	0.0689045	2.79523	0.00518635	0.0507516
TCONS_00000950	3271.01	-0.0260335	0.0590221	-0.441081	0.659155	0.860404
TCONS_00008350	3270.04	-0.141731	0.0727085	-1.9493	0.0512591	0.240726
TCONS_00004305	3259.93	-0.00124244	0.0610717	-0.020344	0.983769	0.993911
TCONS_00005871	3243.34	0.0270395	0.0636782	0.424627	0.671109	0.868063
TCONS_00012631	3240.75	0.129303	0.0670742	1.92775	0.0538859	0.246124
TCONS_00012822	3228.99	0.00218552	0.0667887	0.032723	0.973896	0.990726
TCONS_00008033	3228.12	-0.443164	0.0652504	-6.79174	1.10786e-11	8.38952e-10
TCONS_00010503	3226.43	0.00865771	0.0670511	0.129121	0.897262	0.96597
TCONS_00005384	3221.53	-0.0193638	0.0597267	-0.324207	0.745781	0.906252
TCONS_00001483	3219.42	0.10309	0.0674493	1.52841	0.126411	0.403112
TCONS_00002274	3208.65	0.000450231	0.0784533	0.00573884	0.995421	0.998418
TCONS_00000111	3206.85	0.236147	0.0660653	3.57445	0.000350967	0.00596644
TCONS_00008435	3203.52	-0.110601	0.0771972	-1.43271	0.15194	0.441574
TCONS_00005727	3197.39	-0.191673	0.0642557	-2.98297	0.00285464	0.0321883
TCONS_00002703	3193.46	-0.0897523	0.0735287	-1.22064	0.222221	0.54059
TCONS_00001408	3193.25	0.110404	0.0612535	1.80241	0.0714802	0.291164
TCONS_00008576	3184.51	0.090276	0.0672255	1.34288	0.179309	0.486088
TCONS_00008484	3183.89	-0.228312	0.06783	-3.36594	0.000762831	0.0109323
TCONS_00013553	3178.6	-0.262354	0.0753367	-3.48241	0.000496918	0.00781005
TCONS_00005907	3171.97	0.136065	0.0664566	2.04742	0.0406164	0.206345
TCONS_00009835	3170.55	-0.0242995	0.0602758	-0.403139	0.686846	0.877567
TCONS_00001274	3169.31	-0.038877	0.0691504	-0.562209	0.573973	0.814529
TCONS_00001310	3168.8	0.105534	0.065655	1.60741	0.107965	0.367457
TCONS_00005016	3150.18	0.190191	0.0656356	2.89768	0.00375929	0.0398916
TCONS_00003343	3142.57	0.105766	0.0916362	1.1542	0.248419	0.566552
TCONS_00010256	3141.78	-0.0417764	0.0618631	-0.675304	0.499483	0.774116
TCONS_00004231	3140.57	0.137813	0.0615569	2.2388	0.0251692	0.150508
TCONS_00009891	3134.52	0.0776081	0.0628536	1.23474	0.216926	0.534631
TCONS_00002829	3124.14	0.235596	0.0652387	3.61129	0.000304673	0.00524722
TCONS_00000376	3122.03	-0.00791813	0.0837649	-0.0945281	0.92469	0.974135
TCONS_00011635	3114.54	-0.0987637	0.0681332	-1.44957	0.147179	0.434559
TCONS_00002301	3110.22	0.038087	0.0611209	0.623142	0.533191	0.794186
TCONS_00004022	3109.18	-0.0663925	0.0625769	-1.06097	0.288702	0.609797
TCONS_00002216	3104.73	0.0254876	0.0604967	0.421306	0.673532	0.869072
TCONS_00000822	3102.46	-0.000662961	0.0741909	-0.00893587	0.99287	0.99706
TCONS_00001311	3096.6	-0.218298	0.0688067	-3.17262	0.0015107	0.0196244
TCONS_00001374	3093.22	0.0613011	0.0604061	1.01482	0.310194	0.630415
TCONS_00006013	3090.62	0.113924	0.0627817	1.81461	0.0695845	0.287119
TCONS_00008112	3088.79	-0.00241058	0.0761349	-0.0316619	0.974742	0.990799
TCONS_00000623	3077.95	0.00220601	0.0682731	0.0323115	0.974224	0.990726
TCONS_00000818	3074.52	0.104639	0.0619394	1.68937	0.091148	0.3334
TCONS_00000156	3070.28	0.274637	0.0680015	4.03869	5.37496e-05	0.00120602
TCONS_00003714	3063.67	0.103263	0.0592458	1.74295	0.0813419	0.312205
TCONS_00014748	3062.78	-0.00550747	0.0917623	-0.0600189	0.952141	0.981314
TCONS_00000825	3054.96	0.132414	0.0776522	1.70521	0.0881546	0.327095
TCONS_00000914	3054.75	-0.0915102	0.068924	-1.3277	0.184278	0.492
TCONS_00002030	3053.23	0.104421	0.0766258	1.36274	0.172964	0.478072
TCONS_00003483	3051.55	0.315136	0.0707534	4.454	8.42842e-06	0.000243147
TCONS_00003594	3049.5	0.11613	0.0652487	1.7798	0.0751086	0.299177
TCONS_00008573	3045.62	0.0832056	0.065366	1.27292	0.203046	0.518628
TCONS_00002166	3038.76	0.234773	0.0760494	3.08711	0.00202112	0.0244886
TCONS_00011008	3036.14	0.0376947	0.0626106	0.60205	0.547141	0.801625
TCONS_00003585	3033.2	-0.0869792	0.0702754	-1.23769	0.215831	0.533494
TCONS_00007138	3022.76	0.107623	0.062152	1.7316	0.0833445	0.315932
TCONS_00013659	3022.16	0.010217	0.140017	0.0729699	0.94183	0.979086
TCONS_00006793	3019.08	-0.0119341	0.0628652	-0.189836	0.849438	0.949352
TCONS_00007524	3017.91	-0.0313608	0.0612775	-0.511783	0.608803	0.834225
TCONS_00006318	3012.82	0.214115	0.0660623	3.24111	0.00119065	0.0159327
TCONS_00003485	3012.04	0.091513	0.067831	1.34913	0.177294	0.484365
TCONS_00005874	3002.98	0.112433	0.0696773	1.61363	0.106608	0.364513
TCONS_00011491	3002.3	0.0542262	0.06997	0.774992	0.438344	0.732719
TCONS_00014221	3001.46	0.283696	0.0645679	4.39376	1.11408e-05	0.000308059
TCONS_00012674	3001.22	0.0393917	0.0720739	0.546546	0.584691	0.819255
TCONS_00002999	2995.24	0.109255	0.0701032	1.55849	0.119117	0.390072
TCONS_00003574	2993.78	0.0883617	0.0794861	1.11166	0.266284	0.584298
TCONS_00003827	2984.91	0.0152389	0.0628026	0.242648	0.808278	0.931736
TCONS_00008230	2976.43	-0.0105301	0.065003	-0.161994	0.87131	0.954241
TCONS_00008732	2970.17	0.0163566	0.0766306	0.213448	0.830978	0.941295
TCONS_00013534	2968.7	0.114905	0.0731091	1.57169	0.116021	0.383795
TCONS_00002924	2968.64	0.0217882	0.0759249	0.28697	0.774135	0.918662
TCONS_00014804	2968.62	-0.0853461	0.0778608	-1.09614	0.273019	0.589756
TCONS_00000351	2966.39	0.364882	0.0662992	5.50356	3.72191e-08	1.69882e-06
TCONS_00001701	2959.23	-0.130069	0.0652201	-1.99431	0.0461183	0.225742
TCONS_00014745	2955.16	-0.00309392	0.0614356	-0.0503604	0.959835	0.985417
TCONS_00004656	2944.98	0.0232204	0.0647776	0.358463	0.719997	0.891022
TCONS_00002709	2943.79	0.0849124	0.0684698	1.24014	0.214922	0.533119
TCONS_00000394	2942.86	-0.158497	0.0758099	-2.09072	0.0365535	0.192411
TCONS_00001407	2941.75	0.0389793	0.0704713	0.553124	0.580179	0.817986
TCONS_00006317	2936.82	0.145288	0.0736654	1.97227	0.0485784	0.233557
TCONS_00001589	2934.14	0.184903	0.0686733	2.6925	0.00709175	0.062845
TCONS_00008358	2929.38	0.0818802	0.0704519	1.16222	0.245148	0.56399
TCONS_00009706	2928.03	-0.129122	0.0735864	-1.7547	0.0793111	0.30872
TCONS_00000018	2927.84	-0.0379157	0.068873	-0.550516	0.581966	0.81836
TCONS_00010478	2926.75	-1.4748	0.0725469	-20.329	7.12784e-92	5.93749e-89
TCONS_00000064	2925.13	0.165492	0.0603618	2.74167	0.00611284	0.0566565
TCONS_00010923	2913.55	0.039922	0.0837504	0.476678	0.633591	0.847054
TCONS_00001920	2909.65	-0.0226286	0.0620875	-0.364462	0.715513	0.889498
TCONS_00002454	2905.51	-0.0151536	0.0806107	-0.187985	0.850888	0.949352
TCONS_00011884	2899.01	-0.0523397	0.0648812	-0.8067	0.419839	0.720795
TCONS_00005006	2890.82	0.463567	0.0836471	5.54194	2.99141e-08	1.42391e-06
TCONS_00008932	2890.69	0.17257	0.0780282	2.21163	0.0269922	0.15655
TCONS_00012457	2887.77	-0.0638284	0.0935015	-0.682646	0.494831	0.77121
TCONS_00002734	2884.12	0.0702263	0.0659457	1.06491	0.286916	0.607373
TCONS_00008491	2879.06	0.139898	0.0619475	2.25834	0.0239245	0.146538
TCONS_00002181	2873.07	0.085336	0.0700597	1.21805	0.223206	0.541276
TCONS_00011907	2869.06	0.296858	0.0751526	3.95007	7.81276e-05	0.0016581
TCONS_00000570	2868.72	0.00979872	0.0705509	0.138889	0.889538	0.963381
TCONS_00006646	2863.48	-0.160793	0.069888	-2.30072	0.0214074	0.136255
TCONS_00014118	2861.49	0.0469229	0.0620915	0.755706	0.449825	0.742541
TCONS_00009221	2858.96	-0.0595119	0.0749997	-0.793496	0.427489	0.725251
TCONS_00004082	2857.92	-0.261089	0.0646396	-4.03915	5.36447e-05	0.00120602
TCONS_00004562	2856.44	-0.0314447	0.064259	-0.489344	0.624598	0.841711
TCONS_00009462	2853.9	-0.107315	0.0690024	-1.55524	0.119889	0.391445
TCONS_00010689	2851.89	-0.0681065	0.0680978	-1.00013	0.317248	0.634903
TCONS_00011610	2851	-0.193116	0.0698943	-2.76297	0.00572775	0.0542955
TCONS_00014591	2840.96	0.255563	0.0700288	3.64939	0.000262862	0.0047216
TCONS_00012613	2835.68	-0.41001	0.0728282	-5.62983	1.8039e-08	8.93782e-07
TCONS_00000071	2833.96	0.0398061	0.0687032	0.579393	0.562324	0.809022
TCONS_00003127	2832.53	0.0466509	0.0641276	0.72747	0.466938	0.755554
TCONS_00011009	2830.48	-0.0288894	0.0755258	-0.382511	0.702082	0.884737
TCONS_00005605	2826.87	0.106862	0.0632639	1.68915	0.091191	0.3334
TCONS_00001740	2825.94	-0.153414	0.131467	-1.16694	0.243235	0.561779
TCONS_00014085	2825.14	-0.24238	0.0800187	-3.02904	0.00245335	0.0285824
TCONS_00006152	2807.41	-0.0383422	0.060843	-0.630183	0.528575	0.792002
TCONS_00010898	2803.14	-0.0191293	0.0624111	-0.306505	0.75922	0.912017
TCONS_00012780	2800.49	0.104779	0.0875569	1.1967	0.231424	0.548778
TCONS_00008635	2799.77	-0.136159	0.0775589	-1.75556	0.0791632	0.308505
TCONS_00007426	2797.33	-0.139355	0.0683415	-2.03909	0.0414406	0.209371
TCONS_00006225	2795.47	0.159853	0.0645275	2.47728	0.0132388	0.0975925
TCONS_00003018	2792.65	0.0551706	0.063734	0.865638	0.386689	0.694743
TCONS_00009308	2788.02	0.208514	0.0662729	3.1463	0.00165352	0.0210051
TCONS_00003672	2781.44	0.167423	0.0659694	2.53789	0.0111524	0.0864185
TCONS_00010801	2780.02	-0.0639089	0.0660523	-0.967549	0.333269	0.649765
TCONS_00000652	2778	-0.302438	0.0706554	-4.28047	1.86501e-05	0.000483597
TCONS_00003722	2776.53	-0.0380367	0.0632268	-0.601592	0.547446	0.801625
TCONS_00005306	2771.43	0.232907	0.0948875	2.45456	0.0141057	0.101999
TCONS_00010966	2768.02	0.0712928	0.0758979	0.939326	0.347564	0.663957
TCONS_00008530	2765.25	0.242976	0.0777926	3.12338	0.00178789	0.0223957
TCONS_00002515	2760.91	0.292004	0.0667781	4.37276	1.22688e-05	0.000331008
TCONS_00001978	2757.59	0.0593039	0.0675605	0.877789	0.380058	0.68936
TCONS_00005809	2752.85	0.0403138	0.0657358	0.61327	0.539698	0.799295
TCONS_00011073	2751.79	0.00600751	0.0736639	0.081553	0.935002	0.977389
TCONS_00007307	2746.1	0.214519	0.063279	3.39005	0.00069879	0.0101898
TCONS_00014105	2743.61	-0.276782	0.0754434	-3.66874	0.000243747	0.0044871
TCONS_00011040	2742.93	0.0462273	0.0798868	0.57866	0.562819	0.809022
TCONS_00010484	2742.69	-1.60369	0.0747014	-21.468	3.10273e-102	2.9538e-99
TCONS_00003111	2742.39	0.0394408	0.0839698	0.469702	0.638568	0.850137
TCONS_00013547	2735.74	0.119618	0.073429	1.62903	0.103308	0.358004
TCONS_00006887	2734.86	0.0237247	0.0717994	0.33043	0.741075	0.903995
TCONS_00009926	2728.99	0.105642	0.0674155	1.56703	0.117108	0.386148
TCONS_00004081	2726.93	0.091445	0.0747099	1.224	0.220952	0.539539
TCONS_00013026	2725.26	0.0469292	0.0744991	0.629931	0.52874	0.792002
TCONS_00003289	2723.67	-0.0158697	0.0849849	-0.186736	0.851868	0.949352
TCONS_00011550	2722.61	-0.0103648	0.0685058	-0.151299	0.87974	0.958199
TCONS_00007007	2712.14	-0.208805	0.0660199	-3.16277	0.00156278	0.0201438
TCONS_00003008	2710.03	0.0938532	0.0668105	1.40477	0.160091	0.45475
TCONS_00005895	2703.54	0.238604	0.06687	3.56817	0.000359482	0.00607871
TCONS_00003754	2702.27	-0.0238058	0.0699478	-0.340337	0.733603	0.90098
TCONS_00013171	2697.29	-0.303765	0.0730014	-4.16108	3.16741e-05	0.000762007
TCONS_00012165	2695.48	0.00664369	0.0625319	0.106245	0.915388	0.973189
TCONS_00013783	2695.02	-0.0394544	0.0655619	-0.601789	0.547315	0.801625
TCONS_00011541	2691.69	-0.166534	0.0894926	-1.86087	0.0627622	0.272468
TCONS_00008826	2686.8	0.149075	0.0691914	2.15452	0.0311992	0.173814
TCONS_00006436	2684.24	0.0778922	0.0724146	1.07564	0.282088	0.602233
TCONS_00014393	2679.76	0.0202347	0.0771445	0.262296	0.793094	0.924742
TCONS_00007905	2673.12	-0.167456	0.0694614	-2.41078	0.0159186	0.110272
TCONS_00009465	2672.15	-0.192509	0.0815196	-2.36151	0.0182007	0.121899
TCONS_00010153	2661.68	-0.0328456	0.0633869	-0.518177	0.604335	0.8327
TCONS_00000474	2658.14	0.183897	0.067977	2.70529	0.00682454	0.0609634
TCONS_00001114	2655.39	-0.0508554	0.0632293	-0.804302	0.421222	0.721486
TCONS_00011665	2645.54	0.0896458	0.0706959	1.26805	0.204781	0.520862
TCONS_00006685	2642.79	-0.0422484	0.0673852	-0.626968	0.53068	0.792394
TCONS_00002626	2640	0.0579827	0.0676099	0.857606	0.39111	0.698395
TCONS_00010888	2638.7	0.107579	0.0694761	1.54843	0.121519	0.394255
TCONS_00002573	2637.34	0.10518	0.0637652	1.64949	0.0990474	0.349049
TCONS_00009708	2635.96	-0.110423	0.0744518	-1.48315	0.138036	0.421571
TCONS_00009769	2635.31	0.151923	0.0779052	1.9501	0.0511636	0.240617
TCONS_00000892	2614.58	0.250192	0.0646647	3.86907	0.000109249	0.0021863
TCONS_00001211	2610.84	0.0512663	0.0692069	0.740769	0.458834	0.750532
TCONS_00013285	2610.08	0.11079	0.0652786	1.69719	0.0896605	0.330921
TCONS_00009795	2605.09	0.0948391	0.0660977	1.43483	0.151335	0.440777
TCONS_00009874	2604.79	0.193437	0.0628116	3.07964	0.00207253	0.0250206
TCONS_00005458	2599.47	0.0427272	0.0654523	0.652799	0.513886	0.784544
TCONS_00001927	2596.62	0.10135	0.0663614	1.52724	0.126702	0.403468
TCONS_00000795	2592.8	-0.0133231	0.069574	-0.191496	0.848137	0.948957
TCONS_00014222	2587.4	0.129928	0.080587	1.61227	0.106902	0.364988
TCONS_00014715	2585.59	0.341437	0.064621	5.28369	1.26607e-07	5.33992e-06
TCONS_00006536	2584.04	0.327127	0.0663401	4.93106	8.17846e-07	2.8729e-05
TCONS_00004023	2582.5	0.0590872	0.0654429	0.902882	0.366589	0.677467
TCONS_00013380	2571.06	-0.281096	0.0662981	-4.23989	2.23632e-05	0.000564501
TCONS_00005373	2569.18	0.127643	0.0728222	1.75281	0.0796355	0.308936
TCONS_00002983	2568.09	-0.351847	0.0685731	-5.13097	2.88249e-07	1.10948e-05
TCONS_00001564	2563.92	0.0541673	0.0639301	0.847289	0.396834	0.70149
TCONS_00003387	2562.3	0.0805605	0.0669667	1.20299	0.228979	0.546465
TCONS_00006019	2561.33	0.188989	0.132686	1.42433	0.154351	0.444511
TCONS_00011048	2560.74	0.147265	0.0702617	2.09595	0.0360863	0.190554
TCONS_00012477	2552.83	-0.0244744	0.0725409	-0.337388	0.735825	0.902215
TCONS_00011603	2549.9	-0.0051265	0.0639012	-0.0802255	0.936058	0.977879
TCONS_00005105	2544.79	-0.0627246	0.0633812	-0.98964	0.32235	0.641153
TCONS_00002268	2540.06	0.0521719	0.0683756	0.76302	0.445451	0.739334
TCONS_00002405	2535.02	-0.0286125	0.0658962	-0.434205	0.66414	0.863239
TCONS_00009253	2534.32	0.0933828	0.082088	1.13759	0.25529	0.572599
TCONS_00008481	2533.01	-0.216366	0.0695974	-3.10883	0.00187833	0.0231371
TCONS_00007828	2529.07	0.0962903	0.0700549	1.3745	0.169287	0.47175
TCONS_00012787	2526.55	-0.0816619	0.0689396	-1.18454	0.236198	0.554625
TCONS_00006176	2517.86	0.200325	0.0729969	2.74429	0.00606423	0.0563627
TCONS_00013254	2517.69	0.0665887	0.0786418	0.846734	0.397143	0.70149
TCONS_00005560	2516.99	0.161096	0.0644742	2.49862	0.0124679	0.0937766
TCONS_00007630	2509.21	0.137825	0.0728146	1.89282	0.0583824	0.259893
TCONS_00001140	2506.2	-0.0232509	0.0645269	-0.360328	0.718602	0.890436
TCONS_00004109	2504.42	-0.47676	0.0715614	-6.66225	2.69672e-11	1.9118e-09
TCONS_00008729	2502.57	0.211366	0.0707339	2.98818	0.00280645	0.0317529
TCONS_00010047	2500.55	0.0863966	0.0708912	1.21872	0.22295	0.541276
TCONS_00007661	2499.38	-0.147793	0.0785453	-1.88162	0.0598872	0.264647
TCONS_00010492	2495.01	0.11292	0.0708314	1.59421	0.110889	0.373593
TCONS_00012367	2492.88	0.00336976	0.0928025	0.0363111	0.971034	0.990628
TCONS_00011532	2492.17	0.00529575	0.0763957	0.06932	0.944735	0.979295
TCONS_00009640	2492.08	-0.222404	0.068038	-3.26883	0.00107995	0.0146826
TCONS_00008341	2487.68	-0.0614075	0.0780807	-0.786462	0.431597	0.728696
TCONS_00000801	2486.19	-0.110541	0.0685304	-1.61303	0.106739	0.364774
TCONS_00000796	2484.96	0.0777938	0.0628541	1.23769	0.215831	0.533494
TCONS_00001760	2483.83	-0.157314	0.133722	-1.17643	0.239425	0.557292
TCONS_00007091	2482	-0.226679	0.0714943	-3.17059	0.0015213	0.0197237
TCONS_00010594	2480.45	0.106916	0.0652102	1.63955	0.101098	0.353657
TCONS_00002870	2479.12	-0.101014	0.0695541	-1.45231	0.146414	0.434226
TCONS_00008746	2477.94	-0.0306939	0.0729393	-0.420815	0.67389	0.869072
TCONS_00009846	2477.26	-0.0469694	0.0674996	-0.695848	0.486524	0.768249
TCONS_00005981	2475.86	0.136784	0.0911807	1.50015	0.133577	0.413448
TCONS_00002868	2472.11	0.00768156	0.0627593	0.122397	0.902584	0.968415
TCONS_00014123	2469.3	-0.488712	0.0720449	-6.78344	1.17344e-11	8.78629e-10
TCONS_00008477	2467.9	0.0167753	0.0726594	0.230875	0.817412	0.936229
TCONS_00000670	2465.59	0.019253	0.069117	0.278556	0.780585	0.919951
TCONS_00004771	2458.64	0.100562	0.0835831	1.20314	0.228921	0.546465
TCONS_00001654	2457.58	0.0241708	0.0672337	0.359504	0.719218	0.890703
TCONS_00007102	2451.97	-0.0509914	0.068987	-0.739145	0.459819	0.7513
TCONS_00007627	2449.6	-0.0157651	0.073104	-0.215653	0.829258	0.941053
TCONS_00009428	2442.41	0.218182	0.0900282	2.42348	0.0153724	0.107494
TCONS_00009130	2442.33	-0.0696656	0.0662927	-1.05088	0.293314	0.615055
TCONS_00002043	2439.83	0.174818	0.0672024	2.60137	0.00928533	0.0762037
TCONS_00002218	2434.79	-0.433437	0.067128	-6.45688	1.06882e-10	7.19456e-09
TCONS_00000380	2434.62	0.141502	0.08828	1.60287	0.108963	0.36953
TCONS_00003026	2431.79	-0.0156705	0.0814553	-0.192382	0.847443	0.948782
TCONS_00002717	2428.7	0.0516946	0.0759886	0.680294	0.496318	0.772051
TCONS_00009373	2427.05	0.0503246	0.0684528	0.735172	0.462235	0.752701
TCONS_00001356	2425.49	0.0941339	0.0650666	1.44673	0.147972	0.435551
TCONS_00005630	2423.49	0.238965	0.0681596	3.50596	0.000454955	0.00732324
TCONS_00000040	2420.6	0.1483	0.0788332	1.88119	0.0599456	0.26473
TCONS_00014868	2420.57	0.155102	0.074045	2.09469	0.0361982	0.190842
TCONS_00012176	2411.66	-0.125713	0.0651365	-1.92999	0.0536081	0.245529
TCONS_00000593	2411.09	-0.0130285	0.0667079	-0.195306	0.845153	0.947208
TCONS_00005482	2410.93	0.10336	0.0720798	1.43396	0.151583	0.441101
TCONS_00011372	2410.27	-0.0146062	0.0688288	-0.21221	0.831943	0.941908
TCONS_00004267	2410.16	0.0250452	0.0748129	0.334772	0.737797	0.902529
TCONS_00006674	2409.61	0.30234	0.0719548	4.20181	2.64793e-05	0.000648744
TCONS_00003448	2407.38	0.0414007	0.0687434	0.602251	0.547007	0.801625
TCONS_00007003	2406.58	-0.169605	0.0685821	-2.47302	0.0133977	0.0982205
TCONS_00011373	2404.8	-0.0273673	0.0702139	-0.38977	0.696707	0.88228
TCONS_00009585	2403.61	-0.183624	0.0650344	-2.82349	0.00475042	0.0473588
TCONS_00003476	2402.06	0.0326568	0.0692096	0.471854	0.637031	0.848858
TCONS_00008349	2395.6	-0.0492814	0.0753117	-0.654365	0.512876	0.784261
TCONS_00004192	2394.35	-0.0172062	0.0708368	-0.242899	0.808084	0.931707
TCONS_00010899	2393.29	0.113897	0.0890273	1.27935	0.200773	0.514597
TCONS_00010421	2388.94	-0.00385456	0.0684412	-0.0563193	0.955087	0.982561
TCONS_00000899	2376.07	-0.372064	0.0792305	-4.69597	2.65347e-06	8.58386e-05
TCONS_00008365	2366.34	-0.239255	0.0644104	-3.71454	0.00020357	0.00382138
TCONS_00001833	2365.82	0.143535	0.0708961	2.02459	0.0429098	0.214839
TCONS_00007002	2365.71	0.0159113	0.0793953	0.200407	0.841163	0.946568
TCONS_00010920	2364.89	0.0379229	0.0720914	0.52604	0.598861	0.828828
TCONS_00006388	2358.86	-0.075979	0.0630491	-1.20508	0.228174	0.546053
TCONS_00014377	2357.84	-0.100392	0.0832003	-1.20663	0.227577	0.545504
TCONS_00000115	2354.66	0.148245	0.0665381	2.22797	0.0258823	0.152637
TCONS_00000584	2351.86	0.147322	0.0703759	2.09336	0.036317	0.191317
TCONS_00002921	2347.01	0.0391804	0.0717665	0.545943	0.585105	0.819534
TCONS_00012281	2340.42	-0.251869	0.0731671	-3.44238	0.000576621	0.00881331
TCONS_00000299	2339.19	0.00411245	0.0669831	0.0613954	0.951044	0.980843
TCONS_00007072	2335.72	-0.141967	0.0824835	-1.72116	0.0852213	0.320749
TCONS_00001497	2331.12	-0.073537	0.0668157	-1.10059	0.271073	0.58784
TCONS_00001553	2330.38	-2.44853	0.0778361	-31.4575	3.31611e-217	7.36619e-214
TCONS_00001183	2329.84	-0.0644559	0.0638225	-1.00992	0.312531	0.632466
TCONS_00011919	2327.26	-0.0608361	0.088703	-0.685841	0.492814	0.770492
TCONS_00012667	2326.7	0.211863	0.0660696	3.20667	0.0013428	0.0176846
TCONS_00008644	2325.21	-1.11829	0.0683177	-16.3689	3.18783e-60	1.51741e-57
TCONS_00014206	2325.21	0.0210657	0.068634	0.306928	0.758898	0.912017
TCONS_00004639	2318.37	0.0240664	0.0722163	0.333254	0.738943	0.902716
TCONS_00007487	2316.47	-0.0339969	0.0670405	-0.507109	0.612078	0.836198
TCONS_00002772	2311.42	0.0923328	0.0722982	1.27711	0.201563	0.516026
TCONS_00002487	2309.05	0.258812	0.0700204	3.69624	0.000218819	0.00407322
TCONS_00013172	2297.03	0.157479	0.0661507	2.38062	0.0172838	0.11765
TCONS_00011246	2294.34	0.123789	0.0777679	1.59177	0.111436	0.374489
TCONS_00005059	2292.03	-0.0260375	0.0695031	-0.374624	0.70794	0.887789
TCONS_00012617	2291.01	0.0762369	0.0871859	0.874419	0.38189	0.69173
TCONS_00011697	2290.44	0.0100075	0.0696441	0.143695	0.885741	0.961608
TCONS_00010300	2287.35	0.145954	0.0648202	2.25168	0.0243425	0.147875
TCONS_00008705	2285.5	-0.0326584	0.0715274	-0.456585	0.647969	0.854165
TCONS_00008006	2282.16	0.209774	0.0679488	3.08724	0.00202028	0.0244886
TCONS_00003338	2280.13	0.0800463	0.0821752	0.974093	0.33001	0.646821
TCONS_00001607	2279.77	0.13745	0.0799873	1.7184	0.0857244	0.321718
TCONS_00001606	2277.6	0.181892	0.0748345	2.43059	0.0150745	0.106137
TCONS_00009342	2275.37	0.0205202	0.0820245	0.250172	0.802455	0.929202
TCONS_00005666	2271.93	-0.0270924	0.0811395	-0.333899	0.738456	0.902618
TCONS_00013587	2267.21	-0.104622	0.0926009	-1.12982	0.258553	0.577218
TCONS_00009230	2266.44	0.0749968	0.0758232	0.989101	0.322614	0.641254
TCONS_00011028	2264.44	-0.171864	0.0684485	-2.51086	0.0120439	0.0913087
TCONS_00011652	2262.88	-0.156641	0.0834372	-1.87735	0.0604695	0.265963
TCONS_00004302	2256.64	-0.184957	0.0678101	-2.72758	0.00638012	0.0584026
TCONS_00009251	2256.57	0.0894141	0.0747019	1.19695	0.231328	0.548778
TCONS_00000770	2256.49	0.0643936	0.0698654	0.921681	0.356695	0.670149
TCONS_00001296	2252.63	0.0732033	0.0749357	0.976882	0.328628	0.645255
TCONS_00002225	2249.16	0.131163	0.0708642	1.8509	0.0641838	0.276505
TCONS_00005124	2247.17	-0.0839888	0.0654191	-1.28386	0.199192	0.512317
TCONS_00006189	2246.61	0.0509877	0.0682503	0.747069	0.455022	0.74632
TCONS_00009901	2238.86	0.127919	0.0671446	1.90513	0.0567633	0.255071
TCONS_00003562	2235.96	-0.00354272	0.0644424	-0.0549751	0.956158	0.982989
TCONS_00005713	2235.66	0.126354	0.0706285	1.78899	0.0736168	0.295888
TCONS_00010180	2233.3	-0.0190261	0.0689067	-0.276114	0.78246	0.92037
TCONS_00011227	2230.6	-0.174875	0.0774657	-2.25745	0.02398	0.146591
TCONS_00000996	2229.85	-0.155747	0.0712445	-2.18609	0.0288093	0.16423
TCONS_00006222	2229.75	-0.121556	0.0811934	-1.49711	0.134363	0.414344
TCONS_00014139	2228.42	-0.0695855	0.0741722	-0.938161	0.348161	0.664509
TCONS_00002763	2227.91	-0.143897	0.0704893	-2.0414	0.0412106	0.208525
TCONS_00009785	2227.42	0.136773	0.0833375	1.64119	0.100757	0.353021
TCONS_00005801	2226.77	-0.0137427	0.0813081	-0.16902	0.865781	0.953067
TCONS_00007821	2221.92	0.160872	0.0833884	1.92919	0.0537072	0.245645
TCONS_00014292	2219.03	-0.0034569	0.0804966	-0.0429446	0.965746	0.987529
TCONS_00009458	2214.08	-0.150763	0.0646218	-2.333	0.0196481	0.127892
TCONS_00007382	2208.12	0.132667	0.0683347	1.94142	0.0522069	0.242275
TCONS_00007506	2207.94	0.206704	0.0663155	3.11698	0.00182715	0.0226743
TCONS_00003693	2200.58	0.0127205	0.0784497	0.162149	0.871189	0.954241
TCONS_00013914	2199.07	-0.000860971	0.0762098	-0.0112974	0.990986	0.996369
TCONS_00003843	2192.06	-0.00627491	0.0767396	-0.0817688	0.934831	0.977389
TCONS_00001382	2185.02	0.197979	0.0772352	2.56333	0.0103674	0.0829391
TCONS_00007825	2185.01	-0.0182225	0.0698996	-0.260696	0.794327	0.925384
TCONS_00001768	2183.08	0.0635826	0.0786459	0.808467	0.418822	0.719894
TCONS_00007422	2178.43	0.132208	0.0742199	1.7813	0.0748641	0.298571
TCONS_00012656	2178.02	0.188757	0.0719496	2.62347	0.00870401	0.0729604
TCONS_00012547	2176.13	0.14488	0.0743392	1.94891	0.0513067	0.24078
TCONS_00007683	2175.45	0.010893	0.0777508	0.140101	0.88858	0.963315
TCONS_00001160	2174.25	0.170815	0.0702506	2.4315	0.0150363	0.106137
TCONS_00001194	2167.23	0.0932813	0.0644531	1.44727	0.14782	0.435487
TCONS_00006758	2165.89	0.0391885	0.0648394	0.604394	0.545582	0.801625
TCONS_00007510	2159.91	0.0951987	0.072234	1.31792	0.18753	0.497783
TCONS_00009403	2159.78	-0.168684	0.0737751	-2.28646	0.0222271	0.139605
TCONS_00008022	2156.87	0.0342221	0.0722329	0.473774	0.635661	0.848145
TCONS_00009942	2150.21	0.151229	0.0670209	2.25644	0.024043	0.146591
TCONS_00001514	2146.39	0.16983	0.0722318	2.35118	0.0187141	0.12409
TCONS_00008757	2145.41	-0.30742	0.0664806	-4.6242	3.76047e-06	0.000118206
TCONS_00000963	2144.95	-0.0265628	0.0688609	-0.385746	0.699685	0.883858
TCONS_00007881	2128.44	0.0662702	0.0850536	0.779158	0.435886	0.731859
TCONS_00000214	2124.68	-0.00597136	0.0665094	-0.0897822	0.92846	0.975083
TCONS_00013073	2124.57	0.112219	0.0806636	1.3912	0.164165	0.462187
TCONS_00010597	2120.44	0.154243	0.0686106	2.24809	0.0245707	0.148398
TCONS_00007823	2116.08	0.120959	0.0895746	1.35038	0.176895	0.484119
TCONS_00006310	2115.39	0.0656051	0.0696996	0.941255	0.346574	0.663479
TCONS_00010055	2115	0.168916	0.067831	2.49024	0.0127657	0.0954504
TCONS_00000746	2112.96	-0.159449	0.0787266	-2.02535	0.0428314	0.214802
TCONS_00008125	2111.64	0.0210714	0.0786158	0.268029	0.788677	0.923368
TCONS_00005478	2110.71	0.182112	0.0724629	2.51317	0.0119651	0.0909183
TCONS_00007747	2103.14	0.0897308	0.0809034	1.10911	0.267383	0.584784
TCONS_00002396	2100.5	0.0893093	0.0864001	1.03367	0.30129	0.620073
TCONS_00013218	2098.92	0.0435368	0.0731379	0.59527	0.551663	0.802967
TCONS_00004510	2093.27	0.0731616	0.0911235	0.802885	0.422041	0.721705
TCONS_00011613	2092.23	0.121795	0.0761345	1.59974	0.109656	0.371128
TCONS_00010969	2085.98	0.0956079	0.0659093	1.4506	0.146892	0.434532
TCONS_00007053	2084.82	0.129665	0.0788373	1.64472	0.100027	0.351725
TCONS_00008469	2084.35	0.0805431	0.087057	0.925177	0.354874	0.669599
TCONS_00008003	2084.31	0.0633073	0.0753122	0.840599	0.400573	0.705027
TCONS_00006325	2084.19	-0.414971	0.0694167	-5.97796	2.25944e-09	1.29801e-07
TCONS_00005244	2083.32	-0.0444584	0.0681581	-0.652283	0.514218	0.784765
TCONS_00005951	2081.14	0.0214455	0.0759469	0.282374	0.777656	0.919664
TCONS_00002731	2079.92	0.0339093	0.0766009	0.442674	0.658001	0.859728
TCONS_00008663	2077.94	0.206266	0.0844643	2.44205	0.0146041	0.104084
TCONS_00000769	2077.89	0.0971508	0.0660948	1.46987	0.141597	0.426582
TCONS_00000116	2075.47	0.0434702	0.0974417	0.446115	0.655514	0.858873
TCONS_00005593	2070.59	-0.0336135	0.0752278	-0.446822	0.655003	0.858733
TCONS_00004322	2063.1	0.053595	0.0763556	0.701913	0.482733	0.765632
TCONS_00007800	2063.01	0.0691177	0.0694976	0.994534	0.319963	0.638011
TCONS_00008827	2061.48	0.0116676	0.0663903	0.175742	0.860496	0.952233
TCONS_00011053	2061.2	-0.103146	0.0778261	-1.32534	0.185058	0.4927
TCONS_00011495	2052.83	0.15192	0.0851131	1.78491	0.0742752	0.297279
TCONS_00008807	2048.49	-0.0381748	0.068224	-0.559551	0.575786	0.815847
TCONS_00012983	2046.98	-0.104879	0.0664012	-1.57947	0.114227	0.380035
TCONS_00001767	2046.91	-0.226317	0.0703719	-3.21601	0.00129986	0.0172212
TCONS_00011452	2042.09	0.00787836	0.083726	0.0940969	0.925032	0.974135
TCONS_00002351	2041.61	-0.239425	0.0946141	-2.53054	0.0113887	0.0874359
TCONS_00004169	2041.57	-0.158689	0.0763937	-2.07725	0.0377783	0.196101
TCONS_00005220	2037.71	0.0769812	0.0694696	1.10813	0.267807	0.585008
TCONS_00011078	2037.67	0.126068	0.0713263	1.76748	0.0771475	0.303669
TCONS_00001707	2036.6	-0.210972	0.066185	-3.18762	0.0014345	0.018781
TCONS_00001932	2034.6	0.0565379	0.0897938	0.629642	0.528929	0.792002
TCONS_00014616	2028.76	-0.192758	0.0756389	-2.5484	0.0108219	0.0847438
TCONS_00008666	2025.81	-0.00215746	0.0805389	-0.0267879	0.978629	0.991859
TCONS_00011111	2021.67	-0.0651484	0.0666906	-0.976875	0.328631	0.645255
TCONS_00001482	2021.49	0.104288	0.0721965	1.4445	0.148598	0.436591
TCONS_00004652	2020.94	-0.00582349	0.0691068	-0.084268	0.932843	0.976511
TCONS_00008250	2019.52	-0.103727	0.0884605	-1.17258	0.240964	0.559312
TCONS_00003669	2018.82	-0.0175398	0.0727143	-0.241215	0.809389	0.932049
TCONS_00011894	2018.25	-0.0203591	0.0754522	-0.269828	0.787293	0.922677
TCONS_00004589	2018.15	-0.0897334	0.0808027	-1.11052	0.266773	0.584645
TCONS_00005086	2016.52	0.0780519	0.0736567	1.05967	0.289294	0.610274
TCONS_00014623	2015.29	0.194151	0.0706507	2.74804	0.00599521	0.0560338
TCONS_00003757	2014.09	0.108348	0.0743118	1.45801	0.144837	0.431464
TCONS_00014175	2005.27	-0.24855	0.0687076	-3.61751	0.000297455	0.00518911
TCONS_00014356	2003.31	-0.386831	0.0887353	-4.35938	1.30434e-05	0.000347686
TCONS_00010444	2002.63	0.0210259	0.0664127	0.316594	0.751552	0.90912
TCONS_00010418	2000.9	-0.00462407	0.0676661	-0.0683366	0.945518	0.979295
TCONS_00012019	2000.41	-0.0442638	0.0772063	-0.573318	0.56643	0.812104
TCONS_00000359	1994.6	-0.841058	0.0725326	-11.5956	4.33925e-31	9.32798e-29
TCONS_00014291	1992.42	-0.293792	0.0664603	-4.42057	9.84416e-06	0.000275637
TCONS_00009017	1992.14	-0.0103791	0.0723002	-0.143556	0.885851	0.961608
TCONS_00013436	1991.83	-0.544623	0.0692166	-7.86839	3.59248e-15	3.62731e-13
TCONS_00009639	1990.12	0.0217591	0.0704257	0.308965	0.757348	0.912017
TCONS_00005327	1987.04	-0.0622842	0.0681771	-0.913565	0.360945	0.672634
TCONS_00011275	1981.83	0.0257917	0.0712016	0.362235	0.717176	0.889993
TCONS_00003210	1980.91	0.205813	0.0765531	2.6885	0.00717744	0.0632678
TCONS_00003996	1977.07	0.0840467	0.0671844	1.25098	0.21094	0.529655
TCONS_00004124	1973.37	-0.030143	0.0709465	-0.42487	0.670932	0.868063
TCONS_00007004	1970.74	0.125511	0.0691213	1.8158	0.0694005	0.286901
TCONS_00002251	1969.17	0.0421583	0.0797991	0.528305	0.597288	0.827756
TCONS_00000992	1964.54	0.1368	0.0814173	1.68023	0.0929118	0.337235
TCONS_00012063	1963.27	0.0705362	0.0703159	1.00313	0.315797	0.634859
TCONS_00000360	1962.13	0.0302461	0.0704001	0.429632	0.667463	0.865365
TCONS_00000882	1954.28	0.0126248	0.075043	0.168235	0.866399	0.953067
TCONS_00004218	1952.88	0.0317767	0.0713167	0.445572	0.655907	0.858873
TCONS_00006277	1949.46	0.2212	0.0822465	2.68947	0.00715647	0.0632678
TCONS_00010127	1943.42	-0.081099	0.0704985	-1.15036	0.249994	0.568586
TCONS_00000279	1940.04	-0.172793	0.0863198	-2.00178	0.0453081	0.223158
TCONS_00014168	1935.45	-0.0516734	0.0848688	-0.608862	0.542616	0.800706
TCONS_00009353	1935.31	-0.0393072	0.0767488	-0.512154	0.608543	0.834225
TCONS_00013896	1934.78	0.297235	0.0676976	4.39063	1.13025e-05	0.000311239
TCONS_00008988	1934.11	-0.154199	0.0902617	-1.70836	0.0875704	0.325834
TCONS_00002688	1927.92	0.161478	0.070824	2.27999	0.022608	0.14041
TCONS_00002979	1925.85	0.0344615	0.0692746	0.497462	0.618863	0.8388
TCONS_00003981	1922.71	-0.0877681	0.0704613	-1.24562	0.212903	0.53178
TCONS_00005881	1920.44	0.21384	0.0995673	2.14769	0.0317382	0.175521
TCONS_00000150	1919.81	-0.00825239	0.088574	-0.0931694	0.925769	0.974135
TCONS_00006316	1919.46	0.0441044	0.0801254	0.550443	0.582016	0.81836
TCONS_00002690	1918.3	-0.0555712	0.0708848	-0.783964	0.433061	0.729599
TCONS_00007763	1917.94	0.245908	0.069166	3.55533	0.000377511	0.00628933
TCONS_00010151	1916.89	-0.431014	0.0766697	-5.6217	1.89088e-08	9.26533e-07
TCONS_00002357	1915.9	0.228624	0.0844896	2.70594	0.00681105	0.0609246
TCONS_00009887	1914.56	-0.0206663	0.0741305	-0.278783	0.780412	0.919951
TCONS_00004962	1914	-0.112797	0.0733375	-1.53805	0.124035	0.399696
TCONS_00014207	1913.21	0.267376	0.0822223	3.25187	0.00114648	0.0154346
TCONS_00007670	1911	-0.469928	0.0690968	-6.80102	1.03884e-11	8.04981e-10
TCONS_00002794	1908.58	0.0977479	0.0733903	1.33189	0.182896	0.491059
TCONS_00006891	1902.83	0.193299	0.0706002	2.73794	0.00618248	0.0571024
TCONS_00011631	1902.64	0.242575	0.0695531	3.48763	0.000487329	0.00769563
TCONS_00002593	1897.47	-0.197886	0.0736001	-2.68867	0.00717377	0.0632678
TCONS_00004911	1892.13	0.0466233	0.0772407	0.603611	0.546102	0.801625
TCONS_00001495	1891.8	0.106038	0.0867929	1.22174	0.221805	0.540413
TCONS_00009120	1889.35	0.0802442	0.0878113	0.913826	0.360808	0.672634
TCONS_00012938	1888.51	0.0817152	0.0693061	1.17905	0.238379	0.556999
TCONS_00007201	1885.89	0.341793	0.0716847	4.768	1.86059e-06	6.16866e-05
TCONS_00000161	1884.53	0.0899115	0.0731078	1.22985	0.218754	0.537131
TCONS_00011501	1883.51	-0.0495634	0.0803448	-0.616883	0.537312	0.79836
TCONS_00006441	1883.47	-0.205993	0.0740393	-2.78221	0.00539895	0.0522186
TCONS_00013715	1880.64	-1.83218	0.075696	-24.2044	1.99814e-129	2.21927e-126
TCONS_00003778	1879.36	-0.0139689	0.0754195	-0.185215	0.85306	0.949352
TCONS_00001677	1871.93	0.038132	0.0946414	0.40291	0.687015	0.877567
TCONS_00009817	1870.73	-0.289498	0.0800222	-3.61772	0.000297207	0.00518911
TCONS_00014511	1868.26	-0.0498857	0.0761711	-0.654916	0.512522	0.784079
TCONS_00014353	1864.66	0.0106644	0.0733853	0.14532	0.884458	0.961192
TCONS_00002488	1863.03	0.0260903	0.0725714	0.359512	0.719212	0.890703
TCONS_00010078	1858.45	-0.0548923	0.0834839	-0.65752	0.510847	0.782809
TCONS_00012471	1855.04	0.00250469	0.0733113	0.0341651	0.972745	0.990628
TCONS_00005855	1850.4	-0.0428303	0.0682581	-0.627476	0.530348	0.792394
TCONS_00010701	1836.12	0.134812	0.0717744	1.87828	0.0603431	0.265949
TCONS_00011296	1833.07	0.0743249	0.087437	0.85004	0.395303	0.700984
TCONS_00011470	1827.36	-0.0517662	0.0864969	-0.598474	0.549524	0.802127
TCONS_00004410	1826.12	0.0870006	0.0762486	1.14101	0.253865	0.57214
TCONS_00003258	1825.33	-0.106837	0.136796	-0.78099	0.434808	0.730969
TCONS_00006673	1824.06	0.0280939	0.0685601	0.409771	0.681974	0.874342
TCONS_00007684	1821.3	-0.188779	0.0744224	-2.53658	0.0111941	0.0866406
TCONS_00004518	1820.43	0.170265	0.074315	2.29113	0.0219558	0.138686
TCONS_00014689	1818.42	0.04933	0.0679853	0.725598	0.468085	0.756579
TCONS_00011407	1814.62	0.00730923	0.0722279	0.101197	0.919394	0.973333
TCONS_00008583	1813.87	0.205998	0.0812601	2.53505	0.0112432	0.0867182
TCONS_00009667	1812.22	-0.159323	0.079117	-2.01376	0.0440344	0.218305
TCONS_00000356	1809	0.020433	0.0706949	0.28903	0.772558	0.918197
TCONS_00010452	1806.31	0.0360588	0.0769214	0.468775	0.639231	0.850157
TCONS_00010473	1805.38	0.128433	0.0781699	1.64299	0.100384	0.352084
TCONS_00011024	1802.32	0.0438968	0.0846343	0.518664	0.603995	0.8327
TCONS_00012525	1801.54	0.0674565	0.0878516	0.767846	0.442579	0.736783
TCONS_00006903	1800.85	0.1083	0.0766265	1.41335	0.157554	0.449653
TCONS_00014067	1797.82	0.094621	0.0717106	1.31948	0.187007	0.496896
TCONS_00001317	1797.73	0.135217	0.0892233	1.51549	0.129649	0.407832
TCONS_00001340	1785.95	-0.0356849	0.0770452	-0.463169	0.643243	0.852092
TCONS_00007599	1785.86	0.225303	0.104259	2.161	0.0306952	0.171893
TCONS_00001789	1784.59	-0.239651	0.0783426	-3.05901	0.00222072	0.0263326
TCONS_00011766	1783.41	-0.266598	0.0702074	-3.79729	0.000146287	0.00285045
TCONS_00003010	1782.39	-0.475258	0.0827637	-5.74235	9.33716e-09	4.86116e-07
TCONS_00007859	1779.92	-0.138469	0.0713116	-1.94175	0.0521673	0.242275
TCONS_00002920	1775.6	-0.0894448	0.0769088	-1.163	0.24483	0.563575
TCONS_00002220	1772.71	0.104517	0.0749183	1.39508	0.162992	0.460051
TCONS_00013848	1768.91	0.127528	0.0830843	1.53493	0.124801	0.400996
TCONS_00006806	1764.53	0.0888115	0.0793761	1.11887	0.263196	0.581736
TCONS_00007891	1760.55	-0.110844	0.0691157	-1.60375	0.10877	0.369253
TCONS_00004799	1760.04	0.178181	0.0795954	2.23859	0.0251826	0.150508
TCONS_00001990	1759.23	-0.0214865	0.0787862	-0.272719	0.785069	0.921886
TCONS_00008844	1758.75	-0.642441	0.0776307	-8.2756	1.2781e-16	1.44361e-14
TCONS_00003589	1755.41	-2.89464	0.0979553	-29.5506	6.45377e-192	1.0752e-188
TCONS_00003266	1754.81	0.0133254	0.0818883	0.162726	0.870734	0.954241
TCONS_00013982	1754.05	-0.0998204	0.0727613	-1.37189	0.170098	0.472897
TCONS_00009166	1747.46	0.16244	0.0774236	2.09807	0.0358991	0.189716
TCONS_00014711	1745.54	-0.49693	0.0739748	-6.71756	1.84797e-11	1.33858e-09
TCONS_00003926	1742.47	0.0427183	0.075604	0.565027	0.572055	0.814349
TCONS_00000751	1740.7	-0.0504231	0.0848688	-0.59413	0.552425	0.803107
TCONS_00008048	1740.49	0.492469	0.0889537	5.53624	3.09033e-08	1.46056e-06
TCONS_00011996	1739.16	0.0891907	0.0828301	1.07679	0.281573	0.601991
TCONS_00005000	1737.47	0.0522447	0.0716175	0.729496	0.465698	0.754538
TCONS_00001929	1737.15	0.0587434	0.0688117	0.853684	0.39328	0.700192
TCONS_00001220	1736.16	0.0251478	0.0745102	0.337508	0.735734	0.902215
TCONS_00007192	1735.16	0.119377	0.0704803	1.69377	0.0903099	0.332133
TCONS_00000165	1734.7	-0.0859368	0.0744031	-1.15502	0.248084	0.566451
TCONS_00008522	1732.65	0.271567	0.068739	3.9507	7.79238e-05	0.0016581
TCONS_00011806	1727.7	0.171725	0.0689937	2.489	0.0128102	0.0955961
TCONS_00013760	1720.04	0.265127	0.0768756	3.44878	0.000563132	0.0086468
TCONS_00008449	1716.82	-0.0220823	0.086576	-0.255062	0.798675	0.927616
TCONS_00009558	1716.69	0.0878617	0.0750412	1.17085	0.24166	0.559758
TCONS_00001586	1711.46	0.185684	0.0710715	2.61264	0.00898465	0.0743001
TCONS_00001173	1711.46	-0.34953	0.0783267	-4.46247	8.10203e-06	0.000240896
TCONS_00002032	1711.04	-0.722078	0.104521	-6.90846	4.89933e-12	3.93363e-10
TCONS_00005223	1710.93	0.0336788	0.0847214	0.397524	0.690981	0.879935
TCONS_00006616	1710.22	0.0857842	0.0691887	1.23986	0.215028	0.533119
TCONS_00001282	1702.97	0.173567	0.0705176	2.46133	0.0138421	0.10072
TCONS_00014142	1702.62	-0.270939	0.0697642	-3.88365	0.000102902	0.002078
TCONS_00013883	1702.33	0.0620884	0.0729397	0.851229	0.394642	0.700783
TCONS_00004107	1701.6	-0.0775803	0.0893335	-0.868435	0.385156	0.69426
TCONS_00000355	1700.91	-0.0335734	0.0729085	-0.460487	0.645167	0.853223
TCONS_00002974	1700.85	0.00319695	0.0756029	0.0422861	0.966271	0.987763
TCONS_00008096	1696.81	-0.285019	0.0928581	-3.0694	0.00214488	0.0256616
TCONS_00005052	1695.58	0.0234792	0.0725924	0.323438	0.746363	0.906498
TCONS_00000090	1690.9	0.0321619	0.0785122	0.409642	0.682069	0.874342
TCONS_00009016	1680.42	0.165666	0.0721318	2.29672	0.0216348	0.137048
TCONS_00006744	1674.09	0.0436918	0.0770188	0.567288	0.570519	0.814294
TCONS_00003316	1666.94	0.315066	0.0697871	4.51467	6.34156e-06	0.000192092
TCONS_00006940	1665.4	-0.132535	0.0753255	-1.7595	0.078493	0.307247
TCONS_00004995	1662.84	0.692692	0.0710237	9.75298	1.79136e-22	2.98441e-20
TCONS_00005235	1662.2	0.00737784	0.0803498	0.0918215	0.92684	0.974135
TCONS_00013114	1661.53	0.18533	0.0778788	2.37972	0.0173259	0.117816
TCONS_00014078	1656.01	0.321822	0.0848979	3.79069	0.000150228	0.0029018
TCONS_00010591	1655.66	0.194608	0.0973418	1.99922	0.0455843	0.224353
TCONS_00004997	1654.69	0.117931	0.0756985	1.5579	0.119256	0.390285
TCONS_00004188	1653.3	-0.216888	0.0814933	-2.66141	0.00778131	0.0672722
TCONS_00011573	1650.2	-0.289855	0.0724807	-3.99907	6.3593e-05	0.00138491
TCONS_00000691	1649.87	0.000198394	0.0689223	0.00287853	0.997703	0.999087
TCONS_00004009	1645.01	0.0581833	0.0709278	0.820318	0.412035	0.713195
TCONS_00007438	1642.99	0.0511484	0.0735096	0.695805	0.486551	0.768249
TCONS_00011651	1642.56	-0.0448271	0.0691615	-0.648151	0.516887	0.786424
TCONS_00014729	1642.21	0.00361585	0.0780926	0.0463021	0.963069	0.98665
TCONS_00005787	1641.29	-5.27872e-05	0.0701187	-0.000752826	0.999399	0.999849
TCONS_00010880	1641.22	-0.0778622	0.0773501	-1.00662	0.314117	0.63334
TCONS_00004708	1631.3	0.077508	0.0767741	1.00956	0.312706	0.632519
TCONS_00002656	1628.65	-0.0779016	0.0901043	-0.864571	0.387274	0.694743
TCONS_00011856	1625.63	0.0240528	0.0854831	0.281375	0.778423	0.919664
TCONS_00013576	1624.84	0.0892421	0.0748503	1.19227	0.233154	0.550775
TCONS_00003581	1623.66	0.035639	0.0739119	0.482182	0.629677	0.844129
TCONS_00000838	1623.66	-0.0563936	0.081717	-0.690108	0.490126	0.769521
TCONS_00014000	1623.32	-0.566544	0.081923	-6.91556	4.66003e-12	3.78713e-10
TCONS_00005392	1622.76	-0.10557	0.0727758	-1.45062	0.146884	0.434532
TCONS_00006990	1622.04	0.111228	0.0727763	1.52835	0.126426	0.403112
TCONS_00014374	1621.01	-0.0407274	0.0702039	-0.580131	0.561826	0.808991
TCONS_00008650	1616.96	0.0768061	0.0743509	1.03302	0.301594	0.620145
TCONS_00011780	1616.7	-0.330344	0.0741433	-4.45549	8.37032e-06	0.000243147
TCONS_00005481	1613.24	0.0665104	0.0772651	0.860808	0.389344	0.696533
TCONS_00009791	1611.83	0.00232465	0.0786706	0.0295491	0.976427	0.991133
TCONS_00000425	1611.56	0.0600918	0.0828914	0.724946	0.468485	0.756845
TCONS_00004915	1608.97	0.0147729	0.0812943	0.181721	0.855802	0.950178
TCONS_00008762	1607.45	-0.327929	0.0705231	-4.64996	3.32007e-06	0.000105357
TCONS_00010822	1604.9	-0.576472	0.0861464	-6.69177	2.20492e-11	1.57996e-09
TCONS_00005510	1603.24	0.0058223	0.0759607	0.0766488	0.938903	0.978806
TCONS_00008247	1602.83	0.053096	0.0733838	0.723539	0.469349	0.757506
TCONS_00001195	1600.46	0.0730181	0.0867287	0.841914	0.399836	0.704377
TCONS_00000205	1599.36	0.0515459	0.0758162	0.67988	0.496581	0.772098
TCONS_00007173	1597.39	0.134166	0.0969811	1.38342	0.166536	0.46748
TCONS_00007024	1591.74	-0.190935	0.0734737	-2.59868	0.0093583	0.0767082
TCONS_00009768	1591.1	-0.0153644	0.0764345	-0.201013	0.840688	0.946568
TCONS_00001093	1588.16	-0.0331239	0.087136	-0.38014	0.703841	0.885378
TCONS_00001292	1588.15	0.0282761	0.0747607	0.378221	0.705266	0.886438
TCONS_00011037	1587.2	-0.0536582	0.0846773	-0.633678	0.526291	0.791164
TCONS_00003523	1585.09	0.0800626	0.105361	0.75989	0.447321	0.740298
TCONS_00008461	1584.82	0.177403	0.086272	2.05632	0.039752	0.202994
TCONS_00002905	1584	-0.00562265	0.0725701	-0.0774788	0.938243	0.978683
TCONS_00003065	1579.77	0.109799	0.0771657	1.42289	0.154767	0.444939
TCONS_00003979	1572.97	0.114547	0.0771896	1.48397	0.137816	0.421093
TCONS_00013653	1572.38	0.156139	0.0856573	1.82283	0.0683284	0.284726
TCONS_00003314	1572.02	-0.153962	0.0972905	-1.5825	0.113535	0.378868
TCONS_00003291	1565.63	-0.0455846	0.0713459	-0.638925	0.522872	0.789687
TCONS_00008570	1564.86	0.149167	0.0760753	1.96079	0.0499039	0.236866
TCONS_00008297	1561.73	0.0984693	0.090231	1.0913	0.27514	0.593184
TCONS_00002190	1560.22	-0.0191895	0.0766992	-0.250192	0.802439	0.929202
TCONS_00001773	1547.67	-0.068759	0.0740382	-0.928697	0.353046	0.668761
TCONS_00006684	1542.11	0.263476	0.106535	2.47315	0.0133927	0.0982205
TCONS_00003793	1541.81	0.00116934	0.0788174	0.0148361	0.988163	0.995784
TCONS_00010889	1541.44	-0.0390647	0.0715855	-0.545707	0.585267	0.819546
TCONS_00006873	1540.81	0.0355214	0.08528	0.416527	0.677024	0.871151
TCONS_00009113	1538.67	-0.0207275	0.0706485	-0.29339	0.769224	0.916359
TCONS_00009367	1537.69	0.0672313	0.0777564	0.864641	0.387236	0.694743
TCONS_00007922	1537.68	-0.0143856	0.0722174	-0.199198	0.842108	0.946616
TCONS_00009787	1531.25	0.1782	0.0883232	2.01759	0.0436342	0.217161
TCONS_00012796	1530.47	-0.0370587	0.0856211	-0.432822	0.665144	0.863556
TCONS_00006244	1530.17	0.0966166	0.0945832	1.0215	0.307018	0.627021
TCONS_00012318	1521.44	0.142822	0.093854	1.52175	0.128072	0.405189
TCONS_00013030	1517.57	-0.104784	0.10619	-0.986755	0.323763	0.642321
TCONS_00004888	1516.87	-0.0866483	0.0825925	-1.04911	0.294129	0.615677
TCONS_00005726	1516.39	0.00317219	0.0808693	0.0392262	0.96871	0.98922
TCONS_00013425	1516.34	-0.0431044	0.0723468	-0.595802	0.551307	0.802967
TCONS_00007224	1515.35	-0.0955737	0.0720917	-1.32572	0.184931	0.4927
TCONS_00011154	1514.22	-0.0762278	0.0729588	-1.04481	0.296113	0.6182
TCONS_00005638	1514	0.253797	0.0892809	2.84268	0.00447363	0.0451018
TCONS_00004417	1509.68	0.190949	0.0749005	2.54937	0.0107917	0.0846066
TCONS_00000022	1509.53	0.24411	0.073732	3.31077	0.000930397	0.0129499
TCONS_00011223	1508.42	0.0673814	0.0849043	0.793616	0.427419	0.725251
TCONS_00002830	1508.09	0.24026	0.0817629	2.93849	0.00329813	0.0361938
TCONS_00013384	1504.86	0.112571	0.0758533	1.48406	0.137792	0.421093
TCONS_00012795	1500.29	0.136605	0.0803175	1.70081	0.0889783	0.329052
TCONS_00014364	1496.04	-0.245633	0.0920436	-2.66866	0.00761547	0.0659941
TCONS_00007181	1494.93	0.269678	0.0991161	2.72083	0.00651185	0.0588806
TCONS_00011124	1493.44	-0.000128959	0.0781955	-0.00164919	0.998684	0.999332
TCONS_00008512	1492.68	0.0640227	0.0701106	0.913167	0.361155	0.672836
TCONS_00013765	1490.59	0.155312	0.0785944	1.97612	0.0481409	0.232809
TCONS_00008216	1490.36	0.14479	0.0745564	1.94202	0.0521352	0.242275
TCONS_00000906	1487.13	0.0223684	0.0840395	0.266165	0.790112	0.92371
TCONS_00001721	1485.66	0.104753	0.0862957	1.21389	0.22479	0.542798
TCONS_00011641	1484.88	-0.0306904	0.0744836	-0.412042	0.680309	0.873677
TCONS_00005844	1484.38	0.0422027	0.0743006	0.568	0.570035	0.814127
TCONS_00009935	1483.08	0.187513	0.0858687	2.18372	0.0289827	0.164796
TCONS_00010545	1478.13	0.104824	0.0821754	1.27562	0.202091	0.516583
TCONS_00013724	1477.85	0.131753	0.0748874	1.75935	0.0785176	0.307247
TCONS_00008255	1477.4	-0.0917994	0.088793	-1.03386	0.301202	0.620073
TCONS_00000043	1477.3	0.277212	0.078059	3.55131	0.000383319	0.00635432
TCONS_00012501	1476.87	0.0951232	0.0925362	1.02796	0.30397	0.62387
TCONS_00003239	1476.37	0.124487	0.0748754	1.66259	0.0963952	0.342419
TCONS_00006936	1475.09	0.182307	0.0788897	2.31092	0.0208375	0.133649
TCONS_00008882	1473.49	-0.129387	0.0838306	-1.54343	0.122726	0.397205
TCONS_00002337	1473.19	0.0815104	0.081431	1.00098	0.316838	0.634859
TCONS_00002048	1467.1	-0.0721169	0.0741745	-0.972259	0.330922	0.647654
TCONS_00002846	1466.69	0.0605404	0.0719116	0.841873	0.399859	0.704377
TCONS_00012248	1465.79	0.0606676	0.0907965	0.668171	0.504024	0.776965
TCONS_00002865	1465.72	0.310796	0.0759665	4.09122	4.29115e-05	0.000999868
TCONS_00006036	1465.08	-0.0841242	0.0935242	-0.89949	0.368392	0.678204
TCONS_00009189	1461.14	0.0139406	0.0733445	0.19007	0.849255	0.949352
TCONS_00012646	1459.69	0.133846	0.0752353	1.77904	0.075234	0.299334
TCONS_00008000	1458.63	-0.121058	0.0778264	-1.55549	0.119829	0.391445
TCONS_00011877	1456.37	0.119122	0.0788203	1.51131	0.13071	0.409489
TCONS_00003014	1453.42	0.217879	0.0756787	2.879	0.00398933	0.0416691
TCONS_00012137	1452.97	0.230949	0.0809687	2.85232	0.00434015	0.0441569
TCONS_00009914	1452.16	0.0907958	0.0719529	1.26188	0.206993	0.52369
TCONS_00009587	1452	0.263867	0.0969536	2.72158	0.00649711	0.0588806
TCONS_00009778	1449.8	0.165202	0.0828112	1.99492	0.046052	0.225655
TCONS_00001276	1449.39	0.0674613	0.0775546	0.869856	0.384379	0.693235
TCONS_00011733	1447.47	0.0180329	0.090939	0.198296	0.842813	0.946616
TCONS_00007411	1445.66	-0.0516297	0.0750637	-0.687812	0.491571	0.770058
TCONS_00003452	1441.56	-0.087005	0.0848424	-1.02549	0.305133	0.624702
TCONS_00010373	1441.5	-0.552405	0.0815791	-6.7714	1.27546e-11	9.3403e-10
TCONS_00007256	1438.51	-0.354671	0.0828081	-4.28305	1.84348e-05	0.000479882
TCONS_00009175	1436.48	0.116529	0.082899	1.40567	0.159821	0.454566
TCONS_00009461	1435.03	0.0534606	0.0789404	0.677227	0.498262	0.773089
TCONS_00007912	1434.45	0.00323644	0.0723939	0.044706	0.964342	0.98665
TCONS_00006837	1430.55	0.0580774	0.074673	0.777756	0.436713	0.731955
TCONS_00002392	1428.65	0.153219	0.076918	1.99198	0.0463732	0.226337
TCONS_00002962	1427.62	-0.0010428	0.0756893	-0.0137774	0.989008	0.996183
TCONS_00014096	1425.36	-0.0294243	0.0748109	-0.393316	0.694086	0.881715
TCONS_00010938	1423.71	-0.0909498	0.0999228	-0.910201	0.362717	0.674991
TCONS_00011590	1423.11	0.217088	0.071377	3.04143	0.00235457	0.0276734
TCONS_00013742	1422.01	0.1686	0.0755084	2.23287	0.0255576	0.151527
TCONS_00002862	1420.93	-0.0537452	0.0835982	-0.6429	0.520289	0.788575
TCONS_00009593	1419.96	-0.0557053	0.0817261	-0.681609	0.495486	0.771837
TCONS_00013108	1419.31	0.0960518	0.138747	0.692279	0.488762	0.768717
TCONS_00007839	1417.15	0.172352	0.0975731	1.76639	0.0773309	0.303852
TCONS_00004906	1416.02	0.115725	0.0869691	1.33064	0.183306	0.491059
TCONS_00007322	1412.26	0.00330716	0.0741846	0.0445801	0.964442	0.98665
TCONS_00003876	1410.27	0.0848554	0.0744688	1.13948	0.254505	0.572206
TCONS_00012495	1407.49	-0.00370649	0.0771466	-0.0480448	0.961681	0.986102
TCONS_00012994	1405.82	-0.121643	0.0772102	-1.57548	0.115146	0.381757
TCONS_00008206	1405.77	0.223009	0.0758554	2.93992	0.003283	0.0361938
TCONS_00012953	1403.1	0.0385477	0.0786767	0.489951	0.624169	0.841632
TCONS_00010120	1402.77	0.104873	0.0778298	1.34746	0.177831	0.48469
TCONS_00000125	1402.66	0.252818	0.0833782	3.03219	0.0024279	0.0283428
TCONS_00011121	1401.82	-0.0729167	0.0761725	-0.957258	0.338437	0.655053
TCONS_00005191	1401.61	0.0692898	0.091741	0.755276	0.450084	0.742599
TCONS_00008228	1399.54	-0.00807934	0.0728667	-0.110878	0.911713	0.971787
TCONS_00000566	1394.13	0.245514	0.0914176	2.68563	0.00723938	0.0634779
TCONS_00001127	1392.7	0.204415	0.0798664	2.55946	0.0104834	0.0833103
TCONS_00013189	1389.67	-0.18474	0.0744581	-2.48113	0.0130966	0.0970812
TCONS_00011882	1389.03	0.00771865	0.0901478	0.0856221	0.931767	0.976304
TCONS_00001563	1388.74	-0.16385	0.0793146	-2.06582	0.0388453	0.20005
TCONS_00010687	1387.59	0.0648093	0.0722169	0.897426	0.369492	0.679066
TCONS_00002135	1387.53	-0.189972	0.0851164	-2.23191	0.0256211	0.151633
[truncated: 12,919 more rows]

## Sheet: Filtered Unigenes
GeneID	Base mean	log2(FC)	StdErr	Wald-Stats	P-value	P-adj
TCONS_00013973	4.1546e+06	-0.280397	0.0692777	-4.04744	5.17812e-05	0.00117371
TCONS_00009401	1.56129e+06	-0.371672	0.0475087	-7.82323	5.1483e-15	5.12064e-13
TCONS_00007641	885957	-0.224603	0.0545486	-4.1175	3.83011e-05	0.000911566
TCONS_00004285	824837	-0.0205877	0.060746	-0.338915	0.734674	0.901467
TCONS_00003712	758892	0.0415754	0.0529016	0.7859	0.431926	0.728882
TCONS_00009668	727143	0.0693033	0.056594	1.22457	0.220738	0.53942
TCONS_00012303	599392	-0.120963	0.0468582	-2.58147	0.00983803	0.0798546
TCONS_00011666	595980	0.067166	0.0590813	1.13684	0.255605	0.572748
TCONS_00008277	543367	-0.0385002	0.0552975	-0.696236	0.486281	0.768249
TCONS_00010336	540257	-0.244443	0.0466913	-5.23529	1.64722e-07	6.77597e-06
TCONS_00013141	528853	-0.250961	0.049782	-5.0412	4.62623e-07	1.73198e-05
TCONS_00009270	528167	-0.00770976	0.124259	-0.0620459	0.950526	0.980695
TCONS_00011228	523612	-0.0064602	0.0651766	-0.0991185	0.921044	0.973333
TCONS_00008676	464739	0.147194	0.0533395	2.75957	0.00578781	0.0546523
TCONS_00008377	398261	-0.125284	0.0478647	-2.61746	0.00885873	0.0740606
TCONS_00003365	374269	-0.150831	0.0501097	-3.01002	0.00261233	0.0300148
TCONS_00002589	328613	-0.0917738	0.0512546	-1.79055	0.0733657	0.295744
TCONS_00001636	313943	-0.181461	0.0464437	-3.90712	9.34031e-05	0.00193071
TCONS_00003681	300383	-0.18316	0.0470705	-3.89118	9.97585e-05	0.00202573
TCONS_00010289	295917	-0.0470625	0.0484496	-0.971369	0.331365	0.648285
TCONS_00000669	273898	-0.0354365	0.0455097	-0.778658	0.436181	0.731925
TCONS_00006095	257628	-0.0116638	0.0612369	-0.19047	0.84894	0.949352
TCONS_00005460	244641	-0.123491	0.0643933	-1.91776	0.0551417	0.249298
TCONS_00013853	233635	-0.275309	0.0536324	-5.13327	2.84758e-07	1.10327e-05
TCONS_00010947	215702	0.0318251	0.0564616	0.56366	0.572986	0.814349
TCONS_00005451	203097	-0.0812871	0.0634421	-1.28128	0.200095	0.513848
TCONS_00000060	190593	0.0538925	0.0517427	1.04155	0.297622	0.618342
TCONS_00005402	168662	-0.0465387	0.0591031	-0.787417	0.431038	0.728675
TCONS_00009056	152924	0.121979	0.0634339	1.92293	0.0544889	0.248029
TCONS_00000624	152300	-0.126151	0.0505581	-2.49517	0.0125897	0.0944795
TCONS_00005995	148896	0.0740848	0.0547717	1.35261	0.17618	0.482757
TCONS_00010505	146399	-0.132733	0.0478428	-2.77436	0.00553111	0.0530418
TCONS_00009975	142609	0.157889	0.0476915	3.31064	0.000930825	0.0129499
TCONS_00002445	140904	-0.0575477	0.0461468	-1.24706	0.212377	0.531061
TCONS_00000830	140090	-0.119226	0.0560588	-2.1268	0.0334368	0.182193
TCONS_00012534	126371	-0.036754	0.0459106	-0.800557	0.423388	0.722938
TCONS_00006352	124879	0.0299019	0.0497914	0.600543	0.548144	0.801625
TCONS_00013687	124503	-0.221272	0.0554258	-3.99222	6.54571e-05	0.00141625
TCONS_00003670	119348	-0.125807	0.04818	-2.61119	0.00902272	0.0745073
TCONS_00011858	110202	-0.101217	0.0581901	-1.73942	0.0819617	0.313004
TCONS_00012512	105457	-0.0810745	0.0808722	-1.0025	0.316101	0.634859
TCONS_00012614	103373	-0.0521728	0.0571052	-0.913627	0.360913	0.672634
TCONS_00008588	102063	-0.0175663	0.0536505	-0.327421	0.743349	0.905182
TCONS_00006572	98462.8	-0.305757	0.0498768	-6.13025	8.77411e-10	5.31551e-08
TCONS_00011399	97896.9	-0.172267	0.0479607	-3.59183	0.000328361	0.00559642
TCONS_00007349	97795.9	-0.2159	0.0487111	-4.43226	9.32518e-06	0.000263318
TCONS_00011903	97546.5	-0.222953	0.0499875	-4.46017	8.18961e-06	0.000240896
TCONS_00003789	96860.2	0.0882119	0.0513587	1.71756	0.0858763	0.321867
TCONS_00009927	96052.4	0.0434488	0.0483224	0.899144	0.368576	0.678204
TCONS_00005192	94905	0.0306593	0.046895	0.653787	0.513249	0.784293
TCONS_00010064	91770.3	-0.171395	0.0498418	-3.43878	0.000584339	0.00887023
TCONS_00002457	87627.2	0.0140255	0.0525967	0.266662	0.78973	0.92371
TCONS_00008585	86286.5	-0.0146458	0.0551446	-0.26559	0.790555	0.92371
TCONS_00001623	85034.8	-0.0637262	0.0501898	-1.2697	0.20419	0.519756
TCONS_00008767	83889.4	0.0834099	0.060785	1.37221	0.169997	0.472814
TCONS_00011682	82425.5	-0.00442603	0.0693614	-0.0638111	0.949121	0.980307
TCONS_00009495	81068.1	0.0659647	0.0472471	1.39616	0.162665	0.459682
TCONS_00002913	79765.3	-0.163725	0.0471753	-3.47057	0.000519353	0.00808637
TCONS_00003907	75270.8	-0.283184	0.0470837	-6.01447	1.80478e-09	1.04583e-07
TCONS_00001503	73935.3	0.056049	0.0484485	1.15688	0.247322	0.565793
TCONS_00000061	72817.3	-0.0149979	0.0761112	-0.197052	0.843787	0.946792
TCONS_00006754	70966.6	0.107719	0.0471636	2.28395	0.0223744	0.13985
TCONS_00008353	70124.8	-0.099709	0.0477912	-2.08635	0.0369472	0.193615
TCONS_00003534	70063.3	0.130562	0.0499445	2.61414	0.00894513	0.0741824
TCONS_00001459	67349.5	0.032732	0.0485271	0.674509	0.499988	0.774145
TCONS_00010200	66607.8	-0.0636563	0.0507152	-1.25517	0.209416	0.527495
TCONS_00005111	66153.6	-0.00555006	0.0503021	-0.110335	0.912144	0.971787
TCONS_00006246	65752.7	-0.0107103	0.0469577	-0.228085	0.81958	0.936705
TCONS_00010698	64179.5	-0.0635002	0.0466057	-1.3625	0.173041	0.478087
TCONS_00012929	63505.9	0.018877	0.0683983	0.275986	0.782559	0.92037
TCONS_00012932	62866.6	0.0179463	0.0691355	0.259582	0.795187	0.925449
TCONS_00000131	62633.6	-0.469576	0.049586	-9.46992	2.80054e-21	4.24155e-19
TCONS_00001842	62288.5	0.0656251	0.0483989	1.35592	0.175124	0.481051
TCONS_00010197	60786.4	-0.0619127	0.0507476	-1.22001	0.22246	0.540852
TCONS_00009660	60693.7	-0.0909022	0.0496879	-1.82946	0.0673304	0.283443
TCONS_00001436	59965.3	-0.00658822	0.0482441	-0.13656	0.891379	0.964153
TCONS_00000223	59466.4	-0.0380887	0.0506895	-0.751411	0.452406	0.744374
TCONS_00011972	58767.2	-0.213893	0.0701052	-3.05103	0.00228058	0.0269464
TCONS_00010525	57891.4	0.0477052	0.0487873	0.97782	0.328163	0.645255
TCONS_00002459	57456.1	-0.0180456	0.0563977	-0.319971	0.748991	0.907834
TCONS_00001819	57321.9	0.0682274	0.047236	1.44439	0.148629	0.436591
TCONS_00009326	56939.9	-0.181168	0.058183	-3.11376	0.00184722	0.0227961
TCONS_00003260	56386.2	-0.116797	0.0500705	-2.33265	0.0196667	0.127892
TCONS_00004271	56085.9	-0.0184712	0.0479553	-0.385176	0.700107	0.883858
TCONS_00014395	55522.8	-0.126574	0.0659865	-1.91818	0.0550885	0.249242
TCONS_00007812	55327.1	0.088325	0.0527244	1.67522	0.0938913	0.338322
TCONS_00004438	55089.4	-0.170157	0.0466089	-3.65074	0.00026149	0.0047216
TCONS_00007466	54530.7	-0.0436843	0.0482399	-0.905564	0.365167	0.676904
TCONS_00009976	54162.7	-0.358908	0.0568381	-6.31457	2.70913e-10	1.73593e-08
TCONS_00012943	52699.5	-0.0716704	0.0511561	-1.40102	0.16121	0.457008
TCONS_00004209	52698.1	-0.0427083	0.0571684	-0.747061	0.455027	0.74632
TCONS_00010266	51784.9	-0.208387	0.0470124	-4.4326	9.31019e-06	0.000263318
TCONS_00002042	51771.8	0.2533	0.0493348	5.13431	2.83174e-07	1.10327e-05
TCONS_00013758	51051.8	-0.198221	0.0484202	-4.09377	4.24418e-05	0.000992393
TCONS_00005012	50775.3	-0.148177	0.0510049	-2.90516	0.00367063	0.0394533
TCONS_00003912	50756.8	0.00492504	0.0473523	0.104009	0.917163	0.973189
TCONS_00008975	50702.6	-0.246392	0.0482258	-5.10913	3.23647e-07	1.23245e-05
TCONS_00000865	50059.2	-0.17017	0.0575756	-2.9556	0.00312063	0.0348339
TCONS_00004839	49239.4	-0.0344313	0.0636847	-0.540652	0.588747	0.821844
TCONS_00009152	48862.7	-0.4242	0.0788157	-5.38218	7.35908e-08	3.21155e-06
TCONS_00012122	48507.5	0.0475506	0.0598647	0.794301	0.42702	0.725251
TCONS_00000885	48250.6	-0.182556	0.0558626	-3.26795	0.0010833	0.0146826
TCONS_00013952	46293.2	-0.294065	0.0604044	-4.86826	1.12584e-06	3.92807e-05
TCONS_00009377	46167.1	-0.197857	0.0592385	-3.34	0.000837791	0.0118536
TCONS_00001196	45711.8	-0.130429	0.0506824	-2.57346	0.0100689	0.0810374
TCONS_00008453	45198.7	-0.0939245	0.0732997	-1.28138	0.200061	0.513848
TCONS_00003423	45111.5	0.0304314	0.0478316	0.636219	0.524634	0.79078
TCONS_00003115	45070.2	-0.208235	0.0476325	-4.3717	1.23284e-05	0.000331277
TCONS_00006753	45032.5	0.476904	0.0576531	8.27196	1.31775e-16	1.46358e-14
TCONS_00007809	44961.8	0.0711029	0.0807476	0.880558	0.378557	0.688255
TCONS_00009840	44539.8	-0.084411	0.0503181	-1.67755	0.0934359	0.338216
TCONS_00013129	44435.2	-0.0715268	0.0485908	-1.47202	0.141014	0.42567
TCONS_00005776	44031.9	-0.00812641	0.0482832	-0.168307	0.866342	0.953067
TCONS_00008763	43723.4	0.0363423	0.0604682	0.601015	0.54783	0.801625
TCONS_00004563	43720.9	-0.0888573	0.0529152	-1.67924	0.0931054	0.33757
TCONS_00003544	43677.6	-0.0373891	0.0525218	-0.711878	0.47654	0.762574
TCONS_00005869	43370.3	0.169912	0.0609006	2.78999	0.00527096	0.0512784
TCONS_00006042	43002.9	-0.0594303	0.0578148	-1.02794	0.303977	0.62387
TCONS_00008315	42880.9	0.0846276	0.0593514	1.42587	0.153905	0.444021
TCONS_00001633	42502.8	0.0814814	0.057293	1.42219	0.154972	0.445144
TCONS_00009488	42149.6	-0.013086	0.0565885	-0.231248	0.817122	0.936229
TCONS_00008796	42110	0.0531849	0.0769156	0.691471	0.48927	0.769044
TCONS_00000702	42055.1	0.082312	0.0475901	1.7296	0.0837013	0.317104
TCONS_00004170	41539.5	-0.125359	0.120263	-1.04238	0.297237	0.618342
TCONS_00004432	41266.6	0.00251108	0.0492966	0.0509382	0.959375	0.985096
TCONS_00009517	41157.2	-0.164029	0.0554023	-2.9607	0.00306942	0.0343775
TCONS_00003282	40736.8	-0.0794816	0.0492504	-1.61383	0.106565	0.364513
TCONS_00010504	40608.1	-0.0873433	0.0525092	-1.66339	0.0962343	0.342214
TCONS_00009577	39743.8	-0.0546891	0.0494283	-1.10643	0.268539	0.585968
TCONS_00011969	39345.4	0.122243	0.0477746	2.55873	0.0105054	0.0833226
TCONS_00013580	39110.8	-0.103609	0.0506556	-2.04536	0.0408195	0.207175
TCONS_00007206	37549.7	-0.252623	0.0521517	-4.844	1.27248e-06	4.41656e-05
TCONS_00006698	37168.4	-0.165342	0.0486028	-3.4019	0.000669181	0.00990983
TCONS_00000513	37102.6	0.0802726	0.0530543	1.51303	0.130272	0.409023
TCONS_00009677	36754.8	0.0309571	0.0484705	0.638679	0.523032	0.789687
TCONS_00010205	36735.1	-0.173394	0.0473332	-3.66325	0.000249033	0.00453431
TCONS_00009457	36519.9	-0.0450616	0.0755259	-0.596637	0.55075	0.802579
TCONS_00012058	36386.3	-0.0678664	0.0608423	-1.11545	0.264659	0.583247
TCONS_00008895	36299.2	-0.197224	0.0472501	-4.17405	2.99226e-05	0.000725106
TCONS_00002944	36259.7	-0.02656	0.0466016	-0.569938	0.56872	0.813061
TCONS_00001725	35956.2	-0.0433621	0.0591172	-0.733494	0.463257	0.752701
TCONS_00009626	35830.5	0.102517	0.0588509	1.74199	0.0815107	0.31234
TCONS_00007807	35613.5	0.095552	0.0645361	1.4806	0.138714	0.422674
TCONS_00012569	35561.5	-0.0738355	0.0513358	-1.43829	0.150353	0.439277
TCONS_00007497	35524.8	0.29785	0.0523623	5.68825	1.28351e-08	6.43108e-07
TCONS_00008489	35323.8	-0.0297713	0.076292	-0.390228	0.696368	0.882104
TCONS_00001690	35270.9	0.0519863	0.0669349	0.77667	0.437353	0.732292
TCONS_00009841	35221.6	-0.00642408	0.0549408	-0.116927	0.906918	0.968896
TCONS_00002214	34805	0.0324314	0.0477592	0.67906	0.4971	0.772725
TCONS_00011522	34217.5	0.00117017	0.0463767	0.0252317	0.97987	0.992228
TCONS_00011449	33939.2	0.101549	0.0489814	2.07322	0.0381519	0.197423
TCONS_00001200	33842.4	-0.0772635	0.0522737	-1.47806	0.139393	0.423462
TCONS_00002902	33708.4	-0.0762274	0.0554387	-1.37498	0.169136	0.47175
TCONS_00001570	33299.5	-0.160108	0.0576477	-2.77735	0.00548038	0.0527002
TCONS_00010853	33055.3	-0.127258	0.0519833	-2.44806	0.0143628	0.10314
TCONS_00004946	33015.8	-0.1313	0.0552662	-2.37577	0.0175126	0.118481
TCONS_00002083	32691.6	-0.0494501	0.05074	-0.974578	0.32977	0.646821
TCONS_00006262	32624.1	-0.244173	0.0493815	-4.94464	7.62849e-07	2.71852e-05
TCONS_00001640	32371.8	-0.118939	0.0477379	-2.49149	0.0127209	0.095319
TCONS_00010954	32329.3	0.069803	0.0616144	1.1329	0.257256	0.575763
TCONS_00011451	32192.9	0.102133	0.0491396	2.07842	0.0376707	0.195817
TCONS_00013586	32159.6	0.0673619	0.0626354	1.07546	0.282169	0.602233
TCONS_00009599	31982.3	-0.00298806	0.0485907	-0.0614946	0.950965	0.980843
TCONS_00000787	31805.1	-0.0627434	0.0515292	-1.21763	0.223366	0.541276
TCONS_00001101	31705	-0.0714207	0.0730623	-0.977531	0.328306	0.645255
TCONS_00006977	31583.6	-0.193663	0.0545003	-3.55342	0.000380256	0.00631926
TCONS_00012119	31306.6	-0.127104	0.049487	-2.56843	0.010216	0.0818259
TCONS_00012398	31210.5	0.144878	0.047114	3.07505	0.00210464	0.0252709
TCONS_00002451	31202.2	0.0476664	0.067499	0.706178	0.480077	0.764042
TCONS_00003719	31112.2	0.105037	0.0608677	1.72566	0.0844081	0.319056
TCONS_00011607	30903.5	0.00831891	0.0485697	0.171278	0.864005	0.953067
TCONS_00003586	30723.3	-0.0155155	0.0539108	-0.2878	0.7735	0.918662
TCONS_00012197	30389.8	-0.179981	0.049836	-3.61146	0.000304474	0.00524722
TCONS_00005705	30371	-0.0397579	0.0490998	-0.809735	0.418092	0.719268
TCONS_00003962	30329.1	0.110206	0.0657919	1.67506	0.093922	0.338322
TCONS_00002280	30303.3	0.0797108	0.0466418	1.709	0.0874513	0.325573
TCONS_00010682	30296.7	0.00113504	0.0475797	0.0238555	0.980968	0.992263
TCONS_00000736	30294.8	-0.0553837	0.0497496	-1.11325	0.265602	0.584148
TCONS_00001308	30187.6	0.041297	0.0551133	0.749311	0.45367	0.745386
TCONS_00005709	30019.7	0.00428934	0.0609899	0.0703288	0.943932	0.979197
TCONS_00010464	29731.7	0.134556	0.0573608	2.34578	0.0189875	0.12528
TCONS_00013243	29713.6	0.113623	0.0528575	2.1496	0.0315866	0.175046
TCONS_00008754	29632.9	0.0744166	0.0775811	0.959211	0.337453	0.65412
TCONS_00010121	29612.7	0.0857008	0.059673	1.43618	0.150952	0.43993
TCONS_00008121	29519	0.0698379	0.0489403	1.427	0.15358	0.443944
TCONS_00005399	29473.5	-0.0902744	0.0516802	-1.74679	0.0806739	0.311298
TCONS_00000921	29242.2	0.00832706	0.0699078	0.119115	0.905184	0.968896
TCONS_00011517	28993.8	0.0649108	0.0474061	1.36925	0.170921	0.474196
TCONS_00002494	28902	-0.165838	0.0492575	-3.36676	0.000760565	0.0109233
TCONS_00005150	28705.1	0.190342	0.0542436	3.50902	0.000449754	0.00727466
TCONS_00009716	28701.3	-0.213529	0.0548837	-3.89057	0.00010001	0.00202573
TCONS_00010321	28573.4	-0.0269283	0.0619505	-0.434675	0.663798	0.863132
TCONS_00003430	28236.7	-0.0988502	0.0592552	-1.66821	0.0952739	0.340797
TCONS_00003209	28158.7	0.0179172	0.0562217	0.318688	0.749963	0.908517
TCONS_00001731	27775.1	-0.052906	0.0527916	-1.00217	0.316263	0.634859
TCONS_00011430	27700.4	-0.117718	0.0542779	-2.16881	0.0300975	0.1694
TCONS_00013913	27315.1	0.2073	0.0642968	3.22412	0.00126362	0.0168079
TCONS_00011377	27192.7	0.245097	0.0532617	4.60176	4.18933e-06	0.000130457
TCONS_00006525	27041.1	0.118909	0.061068	1.94716	0.0515151	0.241154
TCONS_00009053	27038.7	0.122173	0.0512162	2.38543	0.017059	0.116357
TCONS_00005883	26996.2	0.0491635	0.0498742	0.98575	0.324256	0.642534
TCONS_00003906	26498.4	-0.0981454	0.0563822	-1.74072	0.0817332	0.312729
TCONS_00000520	26357.9	-0.00911986	0.0613086	-0.148753	0.881748	0.959499
TCONS_00000085	26208.5	0.0749565	0.0650592	1.15213	0.249269	0.567519
TCONS_00008831	26100	0.143315	0.0587912	2.43769	0.0147813	0.104901
TCONS_00004468	25896.4	-0.00685401	0.067466	-0.101592	0.91908	0.973333
TCONS_00002535	25805.2	-0.144786	0.0573363	-2.52521	0.0115631	0.0884851
TCONS_00001710	25724	-0.122752	0.0535531	-2.29215	0.0218968	0.138444
TCONS_00004921	25716.5	0.0031212	0.0470236	0.0663752	0.947079	0.979565
TCONS_00007160	25668.4	-0.0161715	0.0738577	-0.218955	0.826685	0.940235
TCONS_00003220	25610.8	-0.0513021	0.0540445	-0.949256	0.342491	0.659641
TCONS_00009633	25469.5	-0.136268	0.0563442	-2.4185	0.0155846	0.108409
TCONS_00007686	25444.5	-0.099659	0.0484564	-2.05668	0.0397174	0.202973
TCONS_00006253	25418.5	-0.311499	0.0499392	-6.23757	4.44413e-10	2.74219e-08
TCONS_00006155	25277.7	-0.0231348	0.0493826	-0.468481	0.639441	0.850206
TCONS_00002173	25262.6	-0.189047	0.049129	-3.84797	0.000119102	0.00235518
TCONS_00002376	25137	0.0415423	0.0654188	0.63502	0.525415	0.791164
TCONS_00012255	25004.8	-0.197355	0.058083	-3.39781	0.000679286	0.010015
TCONS_00000283	24880.5	-0.0454652	0.0473683	-0.959825	0.337143	0.654047
TCONS_00005813	24830.1	0.0649704	0.0510604	1.27242	0.203223	0.518845
TCONS_00005833	24794	0.0631334	0.0513707	1.22898	0.219081	0.537341
TCONS_00004147	24726.1	-0.171289	0.0594802	-2.87977	0.0039797	0.0416338
TCONS_00005448	24658.1	-0.0584728	0.0488821	-1.1962	0.231618	0.548778
TCONS_00003566	24596.5	-0.193724	0.0485865	-3.98719	6.68598e-05	0.00143727
TCONS_00000164	24555.1	-0.169308	0.0506858	-3.34035	0.000836724	0.0118536
TCONS_00010561	24525.2	-0.0678092	0.0596115	-1.13752	0.255321	0.572599
TCONS_00011860	24508.5	-0.00170921	0.0663382	-0.025765	0.979445	0.991995
TCONS_00013519	24334.3	-0.0246066	0.0499074	-0.493045	0.621981	0.840235
TCONS_00006667	24222.8	-0.0662809	0.0507824	-1.30519	0.191827	0.502197
TCONS_00010039	24161.6	-0.168331	0.0505158	-3.33225	0.000861481	0.0121173
TCONS_00007872	24026.2	0.115634	0.0644816	1.79329	0.0729273	0.294991
TCONS_00005410	23986.5	-0.0166453	0.0656032	-0.253727	0.799706	0.927616
TCONS_00011144	23977.4	-0.0464629	0.0548567	-0.846986	0.397003	0.70149
TCONS_00006106	23952.8	0.0208247	0.0559056	0.372497	0.709523	0.888152
TCONS_00005983	23805.9	-0.0828314	0.0560035	-1.47904	0.13913	0.423362
TCONS_00004338	23776.3	0.0358991	0.0524993	0.683801	0.494101	0.770741
TCONS_00012549	23747.4	-0.0359776	0.0490263	-0.733843	0.463044	0.752701
TCONS_00013775	23646.8	-0.0255861	0.0499517	-0.512217	0.608499	0.834225
TCONS_00012340	23586.5	-0.0448438	0.0505296	-0.887476	0.374823	0.684456
TCONS_00013700	23546.9	-0.325439	0.0497581	-6.54042	6.13469e-11	4.21459e-09
TCONS_00006798	23430.4	-0.0506965	0.0551104	-0.919907	0.357621	0.671321
TCONS_00012160	23396.3	0.0710666	0.0492047	1.44431	0.148653	0.436591
TCONS_00006584	23201	-0.159224	0.0581002	-2.74051	0.00613435	0.0567768
TCONS_00002575	23161	-0.00210664	0.0599224	-0.0351562	0.971955	0.990628
TCONS_00006889	22986.4	0.0119724	0.0533047	0.224602	0.822289	0.938285
TCONS_00004189	22814.7	-0.0699238	0.0596991	-1.17127	0.24149	0.559758
TCONS_00003884	22791.6	0.0998979	0.0669686	1.49171	0.135775	0.417922
TCONS_00004711	22603.1	-0.0784805	0.0713711	-1.09961	0.271501	0.588256
TCONS_00001209	22521.3	0.0365042	0.0677436	0.538857	0.589985	0.822351
TCONS_00007202	22517.1	0.101282	0.0558456	1.81361	0.0697374	0.287119
TCONS_00010049	22441.3	0.0712561	0.0507671	1.40359	0.160442	0.455554
TCONS_00003192	22297.2	0.0552342	0.0541002	1.02096	0.307273	0.627348
TCONS_00005913	22251.5	0.0564056	0.0471106	1.1973	0.231189	0.548778
TCONS_00001208	22086.3	0.121687	0.0538452	2.25994	0.0238251	0.146198
TCONS_00007680	21955.2	-0.188209	0.0662459	-2.84106	0.00449638	0.0452627
TCONS_00001976	21942.3	-0.103739	0.0789946	-1.31324	0.189102	0.498683
TCONS_00008103	21941.6	-0.0165965	0.0523851	-0.316817	0.751382	0.90912
TCONS_00008069	21656.5	0.113255	0.0487071	2.32523	0.0200598	0.13002
TCONS_00000054	21489.7	-0.0583615	0.0502828	-1.16066	0.245779	0.564512
TCONS_00003024	21411.2	-0.0771015	0.0514235	-1.49935	0.133784	0.413702
TCONS_00006218	21192.4	-0.120296	0.0489247	-2.45879	0.0139406	0.101088
TCONS_00008053	20766	0.0348794	0.0549675	0.634545	0.525725	0.791164
TCONS_00000808	20760	-0.00392377	0.0497954	-0.0787979	0.937193	0.978217
TCONS_00002458	20358.3	-0.139112	0.0640762	-2.17103	0.0299286	0.168592
TCONS_00008728	20191.4	0.0602105	0.0530207	1.1356	0.256122	0.573714
TCONS_00008675	20184.6	0.0621836	0.0513567	1.21082	0.225965	0.543755
TCONS_00008990	20108.6	-0.0235023	0.0626855	-0.374924	0.707717	0.887789
TCONS_00011503	20096.8	-0.00708288	0.0510138	-0.138842	0.889575	0.963381
TCONS_00007775	19835.7	-0.149488	0.0510431	-2.92867	0.00340421	0.0371287
TCONS_00009154	19789.6	-0.153346	0.0542212	-2.82815	0.00468176	0.0468457
TCONS_00011036	19702.7	-0.00924312	0.0534154	-0.173042	0.862618	0.952941
TCONS_00007933	19686.4	0.159021	0.0477519	3.33016	0.000867969	0.0121772
TCONS_00013990	19603.3	0.104739	0.0507845	2.06241	0.0391684	0.201092
TCONS_00008631	19580.3	-0.0398203	0.0494516	-0.805238	0.420682	0.721486
TCONS_00003947	19493.5	0.0423199	0.0609902	0.69388	0.487757	0.768436
TCONS_00006794	19406.4	0.00992019	0.0530824	0.186883	0.851753	0.949352
TCONS_00001082	19394.6	0.013058	0.0676103	0.193137	0.846852	0.948634
TCONS_00009119	19173	0.0519543	0.0519288	1.00049	0.317073	0.634903
TCONS_00004630	19171.7	0.0126604	0.0519339	0.243779	0.807402	0.931693
TCONS_00006041	19147.8	-0.0608106	0.0519265	-1.17109	0.241563	0.559758
TCONS_00007383	19134.2	0.0633217	0.0633153	1.0001	0.317261	0.634903
TCONS_00005218	19095.1	-0.0692233	0.0477454	-1.44984	0.147103	0.434532
TCONS_00000701	19076.8	0.0472526	0.0498648	0.947614	0.343326	0.66069
TCONS_00008672	19012.9	-0.10283	0.0724791	-1.41875	0.155972	0.447246
TCONS_00006946	19011.1	-0.131204	0.0536797	-2.44421	0.014517	0.103577
TCONS_00002108	18965.4	-0.0617272	0.051563	-1.19712	0.231259	0.548778
TCONS_00002489	18907.4	-0.0168727	0.0559318	-0.301666	0.762907	0.913733
TCONS_00009269	18828.2	0.043605	0.0542069	0.804419	0.421155	0.721486
TCONS_00009322	18691.1	-0.0647143	0.0580414	-1.11497	0.264865	0.583247
TCONS_00003015	18655.3	0.00817621	0.0483249	0.169193	0.865645	0.953067
TCONS_00009869	18649	0.15111	0.124525	1.21349	0.224943	0.542798
TCONS_00002468	18515.4	-0.0154884	0.0550757	-0.28122	0.778542	0.919664
TCONS_00014741	18399.8	0.0481088	0.0552368	0.870956	0.383778	0.692901
TCONS_00001605	18335.2	-0.107836	0.0581477	-1.85451	0.0636659	0.275258
TCONS_00005288	18320	-0.00555231	0.0559634	-0.0992133	0.920969	0.973333
TCONS_00000977	18317.6	0.00775195	0.0575248	0.134758	0.892803	0.965001
TCONS_00013632	18262.5	0.0654122	0.0526417	1.24259	0.214018	0.532965
TCONS_00011091	18235.4	0.0827928	0.0528926	1.5653	0.117513	0.38691
TCONS_00001025	18207.8	-0.0972022	0.0761891	-1.2758	0.202025	0.516583
TCONS_00003968	18176	0.0711029	0.0543041	1.30935	0.190417	0.500174
TCONS_00009555	18108.9	-0.0464386	0.0648987	-0.715555	0.474266	0.760835
TCONS_00001236	18087.4	0.0840092	0.0677662	1.23969	0.215089	0.533119
TCONS_00002952	18009.1	-0.0961114	0.0648605	-1.48182	0.138389	0.422069
TCONS_00007100	17967.8	-0.0622878	0.0538639	-1.15639	0.247521	0.565858
TCONS_00008038	17935.6	0.0384361	0.065041	0.590951	0.554553	0.804299
TCONS_00000748	17909.9	-0.0227681	0.0526014	-0.432842	0.66513	0.863556
TCONS_00005573	17853.1	0.0550399	0.0507887	1.0837	0.278497	0.597855
TCONS_00011379	17818.2	0.0479835	0.088992	0.539189	0.589757	0.822205
TCONS_00003875	17667.5	0.0776829	0.0711513	1.0918	0.274922	0.592905
TCONS_00013759	17659.8	-0.297028	0.0504706	-5.88516	3.97658e-09	2.17213e-07
TCONS_00009151	17627.7	-0.100297	0.0526302	-1.9057	0.0566896	0.254912
TCONS_00000276	17579.7	0.0727657	0.0622897	1.16818	0.242733	0.561339
TCONS_00006495	17304.5	0.148937	0.0581948	2.55928	0.0104888	0.0833103
TCONS_00006502	17297.8	0.151504	0.0584453	2.59223	0.00953569	0.0779166
TCONS_00006956	17270.8	0.0721328	0.0593703	1.21496	0.22438	0.542352
TCONS_00004871	17268.7	0.0288368	0.056787	0.507807	0.611589	0.836198
TCONS_00005335	17252	-0.091919	0.0492249	-1.86733	0.0618558	0.269481
TCONS_00007609	17235.3	-0.114665	0.050116	-2.28798	0.0221384	0.139443
TCONS_00010324	17169.1	-0.0721006	0.0525186	-1.37286	0.169796	0.472649
TCONS_00004416	17019.2	0.0744023	0.0647222	1.14956	0.250324	0.568822
TCONS_00009928	16972	-0.0125584	0.0532972	-0.235629	0.81372	0.934498
TCONS_00005583	16917.4	0.0613397	0.0494899	1.23944	0.215183	0.533119
TCONS_00004025	16891.5	0.0343853	0.058588	0.5869	0.557271	0.806123
TCONS_00000207	16881.2	-0.21421	0.0535398	-4.00095	6.30895e-05	0.00137845
TCONS_00002107	16867	0.0872875	0.0548897	1.59023	0.111782	0.374894
TCONS_00013817	16843.9	0.00961653	0.0565389	0.170087	0.864942	0.953067
TCONS_00009858	16768.6	0.0486299	0.0567663	0.85667	0.391628	0.698556
TCONS_00014716	16762	-0.231871	0.0836092	-2.77327	0.00554961	0.0531359
TCONS_00007182	16738.9	0.147993	0.0579253	2.55489	0.0106222	0.0836718
TCONS_00001302	16562.5	0.0621422	0.0481815	1.28975	0.197137	0.50957
TCONS_00001415	16455.2	-0.00598657	0.0508142	-0.117813	0.906216	0.968896
TCONS_00004555	16412.4	0.186939	0.0591724	3.15923	0.00158188	0.0203507
TCONS_00005408	16385.4	-0.173846	0.0544551	-3.19246	0.00141065	0.018505
TCONS_00006953	16184.4	-0.00450073	0.0656257	-0.0685819	0.945322	0.979295
TCONS_00005163	16156.1	-0.0852802	0.0515703	-1.65367	0.0981947	0.346961
TCONS_00005567	16064.4	-0.0792177	0.0615959	-1.28609	0.198412	0.511071
TCONS_00008026	16040.6	-0.107732	0.0596982	-1.80461	0.0711352	0.290281
TCONS_00003673	16028.3	-0.0328662	0.0500966	-0.656057	0.511787	0.783989
TCONS_00000778	16011.7	-0.0284223	0.0490585	-0.579356	0.562349	0.809022
TCONS_00006561	15943	0.0136267	0.0609627	0.223525	0.823127	0.938463
TCONS_00011041	15901	-0.0566834	0.0788051	-0.719285	0.471965	0.759521
TCONS_00005798	15807.7	-0.0742464	0.0572927	-1.29591	0.195006	0.506489
TCONS_00002508	15748.5	-0.069437	0.0538261	-1.29002	0.197042	0.50957
TCONS_00000506	15730.5	0.150207	0.0566761	2.65028	0.0080426	0.0685369
TCONS_00004748	15592.5	-0.113354	0.0495936	-2.28565	0.0222749	0.139642
TCONS_00010014	15582.9	0.0787632	0.0727168	1.08315	0.278742	0.597855
TCONS_00003112	15497.2	0.063222	0.0517996	1.22051	0.222271	0.54059
TCONS_00001227	15492.8	0.087617	0.051974	1.68579	0.0918372	0.334794
TCONS_00005409	15489.6	0.0546101	0.0558823	0.977234	0.328454	0.645255
TCONS_00009010	15478.9	0.0216408	0.0496861	0.435551	0.663163	0.86263
TCONS_00005936	15460.5	0.174446	0.0625082	2.79076	0.00525836	0.0512306
TCONS_00012982	15405.5	-0.118273	0.0500632	-2.36248	0.0181533	0.121826
TCONS_00013549	15395.4	-0.0725314	0.131335	-0.552264	0.580768	0.818015
TCONS_00003310	15136.9	-0.000291478	0.0624433	-0.00466788	0.996276	0.998918
TCONS_00013131	15131.3	-0.173308	0.0608093	-2.85002	0.00437167	0.0444098
TCONS_00001959	15108.4	0.00385914	0.057414	0.067216	0.94641	0.979295
TCONS_00013080	15060.8	-0.149217	0.0484944	-3.077	0.00209096	0.0251974
TCONS_00007663	14990.1	-0.0732778	0.050069	-1.46354	0.14332	0.428902
TCONS_00000444	14979.2	-0.14215	0.0515024	-2.76006	0.00577903	0.0546523
TCONS_00007535	14926	0.0122123	0.0564568	0.216311	0.828745	0.941005
TCONS_00012732	14905	-0.155093	0.0603282	-2.57082	0.0101459	0.0814607
TCONS_00012038	14892.4	0.0126457	0.0494027	0.255971	0.797973	0.927235
TCONS_00002374	14772.7	-0.0979057	0.0763272	-1.28271	0.199593	0.512954
TCONS_00006261	14730.6	0.0953091	0.062353	1.52854	0.126378	0.403112
TCONS_00008557	14724.4	0.110624	0.0522275	2.11812	0.0341652	0.183873
TCONS_00005949	14671.2	-0.140002	0.0563297	-2.48541	0.0129402	0.0960519
TCONS_00002008	14626.1	-0.204735	0.0540647	-3.78686	0.000152566	0.00293844
TCONS_00004448	14624.2	0.0147561	0.0593898	0.248461	0.803777	0.929959
TCONS_00012981	14604.1	-0.132622	0.0498841	-2.6586	0.00784651	0.0674699
TCONS_00004823	14555.9	0.165434	0.0645841	2.56153	0.0104212	0.0831412
TCONS_00005112	14520.8	-0.0897274	0.0512081	-1.75221	0.0797374	0.308936
TCONS_00013538	14489.6	0.00152868	0.0501237	0.0304983	0.97567	0.990987
TCONS_00010247	14446.1	0.0279483	0.0745812	0.374737	0.707856	0.887789
TCONS_00000435	14438.3	0.144948	0.0592445	2.44661	0.0144207	0.103333
TCONS_00010639	14411.3	-0.0012907	0.0580285	-0.0222425	0.982255	0.993284
TCONS_00010306	14381.8	-0.103711	0.0531225	-1.9523	0.0509026	0.239898
TCONS_00009272	14381.1	-0.0444592	0.0498711	-0.891483	0.37267	0.682304
TCONS_00008495	14355.2	-0.01369	0.0549012	-0.249357	0.803085	0.929447
TCONS_00000617	14353.2	-0.113939	0.0509403	-2.23671	0.0253055	0.150702
TCONS_00008637	14315	-0.0939338	0.0797393	-1.17801	0.238792	0.557182
TCONS_00002621	14311.5	0.130006	0.0553862	2.34726	0.0189119	0.124976
TCONS_00000062	14302.6	-0.302619	0.0628452	-4.8153	1.4698e-06	5.02296e-05
TCONS_00006414	14298.9	0.128757	0.0707006	1.82116	0.068582	0.284754
TCONS_00005140	14215.8	-0.237491	0.0566585	-4.19162	2.76968e-05	0.000673618
TCONS_00000792	14141	-0.0876687	0.0491763	-1.78274	0.0746279	0.298333
TCONS_00001634	14132.7	-0.0252888	0.055913	-0.452289	0.651061	0.856025
TCONS_00005190	14088.4	-0.0035268	0.0522759	-0.0674651	0.946211	0.979295
TCONS_00002739	14040.4	-0.0814656	0.0562984	-1.44703	0.147888	0.435496
TCONS_00010710	14029.8	0.157575	0.0571446	2.75748	0.00582492	0.054848
TCONS_00007947	14000.9	-0.0895536	0.062265	-1.43827	0.150359	0.439277
TCONS_00004802	14000.6	0.129274	0.0708466	1.8247	0.0680468	0.284726
TCONS_00004284	13987.5	0.046009	0.0535219	0.85963	0.389993	0.696865
TCONS_00009859	13950.7	-0.0788423	0.0518585	-1.52033	0.128427	0.405632
TCONS_00002705	13936.3	-0.0828404	0.0674222	-1.22868	0.219192	0.537415
TCONS_00000073	13925.9	0.0145626	0.0548266	0.265612	0.790538	0.92371
TCONS_00006342	13860.4	-0.0610079	0.0531929	-1.14692	0.251415	0.569471
TCONS_00007530	13838.1	0.0177705	0.0542494	0.32757	0.743236	0.905182
TCONS_00009361	13772	-0.0331507	0.0485967	-0.682159	0.495138	0.771476
TCONS_00006554	13733	0.0321777	0.0691959	0.465024	0.641914	0.851626
TCONS_00010592	13708.1	-0.0795599	0.0520964	-1.52717	0.126719	0.403468
TCONS_00003106	13692.1	0.0132572	0.06393	0.207371	0.83572	0.944099
TCONS_00013558	13688.6	-0.0817826	0.0510648	-1.60155	0.109256	0.370338
TCONS_00009129	13622.5	-0.0145113	0.0499534	-0.290497	0.771436	0.917961
TCONS_00003221	13583.5	-0.0593761	0.0618632	-0.959796	0.337158	0.654047
TCONS_00000656	13516.7	-0.856465	0.0603328	-14.1957	9.74374e-46	2.70551e-43
TCONS_00010186	13402	-0.0491737	0.0776143	-0.633565	0.526365	0.791164
TCONS_00011112	13352.5	-0.0978107	0.0617891	-1.58298	0.113426	0.378694
TCONS_00000975	13338.7	0.0929742	0.0639027	1.45493	0.145688	0.43342
TCONS_00008498	13291	0.0704494	0.0635546	1.10849	0.267652	0.585008
TCONS_00007390	13273.5	-0.00559935	0.0785242	-0.0713073	0.943153	0.979086
TCONS_00004203	13222.5	0.159699	0.0641046	2.49123	0.0127302	0.095319
TCONS_00010486	13054.2	-0.474222	0.0510915	-9.28181	1.66624e-20	2.3133e-18
TCONS_00005136	13035.7	0.0396586	0.0549395	0.721861	0.47038	0.758068
TCONS_00006607	13015.1	0.0660905	0.0727465	0.908505	0.363612	0.675281
TCONS_00007568	13013.1	-0.0191133	0.065832	-0.290335	0.77156	0.917961
TCONS_00007511	13002.2	0.0355537	0.0527466	0.674047	0.500281	0.774419
TCONS_00004089	12957.1	-0.0256418	0.0552964	-0.463717	0.642851	0.85202
TCONS_00010242	12857	-0.00481511	0.0656876	-0.0733031	0.941565	0.979086
TCONS_00011973	12824.7	0.0529294	0.0595526	0.888783	0.37412	0.684188
TCONS_00003649	12822.6	0.248947	0.0589205	4.22513	2.38801e-05	0.000598259
TCONS_00000817	12800.8	-0.0933083	0.0542975	-1.71846	0.085712	0.321718
TCONS_00011183	12752.5	0.133573	0.138605	0.963696	0.335198	0.651622
TCONS_00009212	12749.4	0.130379	0.0660387	1.97429	0.0483492	0.23314
TCONS_00000710	12746.1	-0.0386605	0.0511241	-0.75621	0.449523	0.742226
TCONS_00007145	12725.6	0.0695663	0.0569837	1.22081	0.222158	0.54059
TCONS_00008543	12712.5	0.13227	0.0495505	2.66941	0.00759857	0.0659334
TCONS_00007319	12674.3	-0.0860611	0.058202	-1.47866	0.13923	0.423462
TCONS_00001675	12670.8	0.130929	0.0528814	2.47591	0.0132899	0.0977525
TCONS_00001481	12603.3	0.119707	0.0532386	2.24851	0.024544	0.148398
TCONS_00001713	12561.5	0.0654701	0.0532612	1.22923	0.218986	0.537307
TCONS_00002044	12537.8	-0.166835	0.0617175	-2.70321	0.00686735	0.0611819
TCONS_00014660	12463	-0.47144	0.0629395	-7.49036	6.86873e-14	6.2703e-12
TCONS_00007274	12452.5	0.0528377	0.0723213	0.730597	0.465025	0.754181
TCONS_00007174	12430.6	0.00945072	0.0787844	0.119957	0.904517	0.968896
TCONS_00008396	12380.7	0.00796515	0.0536711	0.148407	0.882022	0.959577
TCONS_00004554	12285.9	0.0402699	0.0525385	0.766484	0.443388	0.73776
TCONS_00001414	12277.8	-0.00608506	0.0508697	-0.11962	0.904784	0.968896
TCONS_00010150	12277.6	0.192973	0.0624655	3.08928	0.00200641	0.0243991
TCONS_00009144	12270.1	-0.178614	0.0605282	-2.95092	0.00316826	0.0351889
TCONS_00012562	12254	-0.0367986	0.0625803	-0.588022	0.556518	0.805699
TCONS_00012611	12247.3	-0.146659	0.0709292	-2.06768	0.0386706	0.199459
TCONS_00001867	12239	-0.0870995	0.0539387	-1.61479	0.106357	0.364028
TCONS_00000976	12232.7	-0.205427	0.0564249	-3.64072	0.000271878	0.00483146
TCONS_00014510	12187.3	0.0151824	0.0758232	0.200234	0.841298	0.946568
TCONS_00010402	12139.9	0.0303757	0.0558406	0.543971	0.586461	0.820467
TCONS_00000768	12137.9	-0.0369082	0.0515281	-0.716273	0.473823	0.760623
TCONS_00010426	12115.6	0.0240393	0.0516642	0.465299	0.641718	0.851572
TCONS_00005395	12077.9	-0.161415	0.0526319	-3.06687	0.00216312	0.0258334
TCONS_00004412	12076.1	-0.053539	0.0547123	-0.978556	0.327799	0.645255
TCONS_00001891	12053	0.129673	0.0705111	1.83905	0.0659082	0.279543
TCONS_00005267	12033.4	-0.00985094	0.0496714	-0.198322	0.842793	0.946616
TCONS_00013360	12024.6	-0.197228	0.0557089	-3.54032	0.000399638	0.0066084
TCONS_00001146	12014.9	0.0540285	0.0593246	0.910726	0.36244	0.674853
TCONS_00011688	11996.6	0.0696125	0.0497057	1.40049	0.161366	0.457008
TCONS_00008584	11916.4	0.0132832	0.0600635	0.221153	0.824974	0.939718
TCONS_00007340	11885.8	-0.145166	0.054941	-2.64221	0.00823672	0.0699229
TCONS_00005403	11836.5	-0.171475	0.0523636	-3.27469	0.00105778	0.0144153
TCONS_00009996	11791.1	-0.147171	0.0614431	-2.39523	0.0166097	0.113759
TCONS_00006323	11778.7	-0.0816585	0.0494664	-1.65079	0.0987823	0.348483
TCONS_00002613	11727.3	0.0252655	0.0536486	0.470944	0.637681	0.849391
TCONS_00000230	11720.4	0.155937	0.0697073	2.23702	0.0252851	0.150702
TCONS_00005450	11710	-0.191957	0.0654904	-2.93107	0.00337796	0.0369028
TCONS_00006534	11697.3	0.0531838	0.0604536	0.879747	0.378997	0.688559
TCONS_00000470	11630.2	0.0938309	0.063918	1.46799	0.142107	0.427155
TCONS_00006141	11589.8	0.0828374	0.0544319	1.52185	0.128046	0.405189
TCONS_00002863	11577.5	-0.00869099	0.0651134	-0.133475	0.893818	0.965381
TCONS_00006247	11570.1	0.125345	0.0601092	2.08528	0.0370438	0.193615
TCONS_00004365	11548.7	-0.0470476	0.0682956	-0.688882	0.490897	0.76997
TCONS_00002686	11531.9	-0.112991	0.0518159	-2.18063	0.0292109	0.165885
TCONS_00002049	11483.3	0.195255	0.05635	3.46504	0.000530152	0.00821612
TCONS_00009711	11468.2	-0.0166497	0.0504529	-0.330004	0.741397	0.904057
TCONS_00013006	11464.2	0.0983428	0.0608956	1.61494	0.106323	0.364028
TCONS_00001137	11453.9	0.141464	0.0590119	2.39721	0.0165205	0.113497
TCONS_00008781	11446.2	-0.0734442	0.0549487	-1.3366	0.181355	0.488879
TCONS_00014261	11423.2	0.0460728	0.0531842	0.866287	0.386333	0.694743
TCONS_00009328	11400.1	0.0510153	0.0532267	0.958454	0.337834	0.65412
TCONS_00001557	11359.5	-0.00926037	0.0565466	-0.163765	0.869916	0.954241
TCONS_00005273	11355.6	-0.00592581	0.0640909	-0.0924595	0.926333	0.974135
TCONS_00011070	11353.3	-0.0310929	0.0625329	-0.497225	0.619031	0.8388
TCONS_00009671	11349.7	0.141197	0.0613245	2.30246	0.0213095	0.135762
TCONS_00011113	11344.1	0.0478828	0.0529672	0.904007	0.365992	0.677061
TCONS_00011034	11328.9	-0.0700089	0.0713449	-0.981274	0.326458	0.644909
TCONS_00007907	11326.5	0.129935	0.0546776	2.37639	0.017483	0.118401
TCONS_00011822	11317.1	0.25228	0.0599953	4.205	2.61087e-05	0.000642023
TCONS_00005531	11282.5	0.193549	0.0678463	2.85275	0.00433429	0.0441569
TCONS_00002632	11280.9	0.166535	0.0527598	3.15647	0.0015969	0.0205043
TCONS_00001400	11251.3	-0.0107887	0.0504533	-0.213835	0.830676	0.941112
TCONS_00011901	11216.6	-0.0444062	0.0512384	-0.866658	0.386129	0.694743
TCONS_00002253	11168.1	0.0604785	0.056502	1.07038	0.28445	0.605421
TCONS_00002623	11163.8	0.0529996	0.0516082	1.02696	0.304439	0.624361
TCONS_00002650	11132.3	0.00958326	0.0499122	0.192002	0.84774	0.948831
TCONS_00011466	11128.4	-0.307409	0.0528408	-5.81764	5.96838e-09	3.18186e-07
TCONS_00006224	11108.3	0.0391317	0.0639836	0.61159	0.540809	0.799812
TCONS_00004275	11101.9	-0.11765	0.0555685	-2.11721	0.0342416	0.183873
TCONS_00012814	11057.8	-0.0899751	0.0530733	-1.6953	0.0900191	0.331246
TCONS_00009920	11049.4	-0.0883203	0.0670595	-1.31704	0.187824	0.497783
TCONS_00009650	11028.9	-0.262329	0.052443	-5.00217	5.66876e-07	2.0987e-05
TCONS_00010624	11026.2	-0.256984	0.0706219	-3.63887	0.000273832	0.00485323
TCONS_00002904	11005.2	-0.0269617	0.0689625	-0.390962	0.695826	0.882104
TCONS_00005614	10983.9	0.0710311	0.055372	1.2828	0.199563	0.512954
TCONS_00002387	10974	-0.0800463	0.0502477	-1.59304	0.111152	0.3741
TCONS_00005053	10965.9	0.0702712	0.051719	1.35871	0.174238	0.480001
TCONS_00011664	10944.8	0.177193	0.0506081	3.50129	0.000463019	0.00739942
TCONS_00003772	10943	0.195077	0.0681927	2.86067	0.00422744	0.0432744
TCONS_00005378	10839.8	0.0746278	0.056265	1.32636	0.18472	0.492467
TCONS_00000089	10785.2	0.00291099	0.0605302	0.0480915	0.961643	0.986102
TCONS_00006249	10779.9	0.12042	0.0518744	2.32137	0.0202668	0.131124
TCONS_00011152	10759.9	0.00416505	0.0568359	0.0732821	0.941582	0.979086
TCONS_00014560	10668.4	-0.0492689	0.0619428	-0.795394	0.426384	0.724861
TCONS_00004349	10654.9	-0.175125	0.0544927	-3.21373	0.00131022	0.0173239
TCONS_00006733	10648.9	-0.181421	0.0543076	-3.34062	0.000835923	0.0118536
TCONS_00010955	10615.9	-0.19017	0.0634722	-2.99612	0.00273439	0.0310955
TCONS_00001895	10588	0.0128906	0.0571257	0.225654	0.82147	0.938019
TCONS_00001808	10587.9	0.0729548	0.0573803	1.27142	0.203578	0.518845
TCONS_00005100	10522.1	0.0323512	0.0519604	0.622612	0.53354	0.794527
TCONS_00013289	10516.6	0.153165	0.0876767	1.74693	0.0806491	0.311298
TCONS_00007731	10494.6	0.0963069	0.0707726	1.36079	0.173579	0.478779
TCONS_00009150	10491.9	0.046562	0.0534587	0.87099	0.383759	0.692901
TCONS_00001243	10481.4	-0.132667	0.13103	-1.01249	0.311302	0.631127
TCONS_00010152	10472.6	-0.110726	0.0562716	-1.96771	0.0491018	0.234394
TCONS_00012177	10472.2	0.10577	0.0497671	2.1253	0.0335618	0.182593
TCONS_00006238	10466.6	0.010097	0.0609279	0.16572	0.868377	0.953872
TCONS_00004525	10454.8	0.0599685	0.0546856	1.0966	0.272814	0.589697
TCONS_00004770	10431.8	0.0343415	0.124108	0.276706	0.782006	0.92037
TCONS_00000766	10413.5	0.113707	0.0582964	1.95049	0.051118	0.240617
TCONS_00010688	10404	-0.00220087	0.0640789	-0.0343462	0.972601	0.990628
TCONS_00002864	10397.6	0.235824	0.0528564	4.4616	8.13496e-06	0.000240896
TCONS_00005328	10383.3	0.199739	0.0566974	3.52289	0.000426864	0.00700386
TCONS_00011789	10368.3	0.0178625	0.0749268	0.2384	0.811571	0.933916
TCONS_00012949	10330	0.175357	0.0599679	2.92419	0.00345356	0.037483
TCONS_00006774	10305.9	0.150387	0.0720636	2.08687	0.0369	0.193615
TCONS_00002658	10296.2	0.122863	0.0840798	1.46126	0.143944	0.429575
TCONS_00007739	10274.6	-0.10477	0.0505418	-2.07293	0.0381786	0.197423
TCONS_00004610	10268.6	0.0843501	0.0546732	1.5428	0.122878	0.397313
TCONS_00006239	10267.2	0.0373207	0.05287	0.705895	0.480253	0.764042
TCONS_00008276	10215.8	0.0619939	0.0677132	0.915536	0.35991	0.672491
TCONS_00007229	10213.8	-0.0248665	0.0543205	-0.457773	0.647115	0.853767
TCONS_00000655	10199	0.247033	0.0633498	3.89951	9.63893e-05	0.00197036
TCONS_00014361	10198.4	0.226583	0.0553454	4.09398	4.24037e-05	0.000992393
TCONS_00004088	10193	0.120013	0.0562302	2.13432	0.0328168	0.179845
TCONS_00011831	10175.9	0.00019849	0.0521068	0.00380929	0.996961	0.998918
TCONS_00001265	10162.6	-0.133896	0.13213	-1.01337	0.310885	0.631127
TCONS_00009456	10151	0.119348	0.054634	2.1845	0.0289256	0.164612
TCONS_00012117	10136.6	0.207736	0.0538748	3.8559	0.000115304	0.00228687
TCONS_00005108	10101.2	0.065276	0.0519968	1.25538	0.209339	0.527495
TCONS_00012114	10097.7	0.212306	0.0542264	3.91518	9.03361e-05	0.00187539
TCONS_00001287	10044.8	0.214773	0.0639692	3.35745	0.00078664	0.0112493
TCONS_00009356	10026.8	-0.0715959	0.0538819	-1.32876	0.183929	0.49187
TCONS_00009414	10023.3	0.0735126	0.069685	1.05493	0.291459	0.612925
TCONS_00014680	9997.21	-0.0489899	0.0891792	-0.549341	0.582771	0.818804
TCONS_00000206	9973.07	0.0714816	0.0576746	1.23939	0.215199	0.533119
TCONS_00003844	9966	0.104563	0.0660437	1.58324	0.113366	0.378683
TCONS_00011701	9915.04	-0.0476079	0.0741107	-0.64239	0.52062	0.788575
TCONS_00007168	9899.83	0.183879	0.0566131	3.24799	0.00116223	0.0155837
TCONS_00006432	9877.17	-0.0438901	0.0611542	-0.717696	0.472945	0.760262
TCONS_00003913	9860.78	-0.12631	0.0632613	-1.99665	0.0458635	0.224896
TCONS_00004849	9846.88	-0.0494094	0.0579275	-0.852951	0.393686	0.700728
TCONS_00004111	9842.49	-0.174549	0.0584729	-2.98513	0.00283459	0.0320164
TCONS_00003038	9833.21	0.0482066	0.0556339	0.866496	0.386218	0.694743
TCONS_00005154	9819.06	0.205331	0.0569534	3.60524	0.000311866	0.00535639
TCONS_00008987	9804.6	0.0865043	0.0605907	1.42768	0.153383	0.44364
TCONS_00010707	9776.52	0.100281	0.0581868	1.72343	0.0848102	0.320361
TCONS_00010375	9762.96	-0.121201	0.0647495	-1.87185	0.0612279	0.26755
TCONS_00005262	9752.41	0.0585206	0.0728339	0.803481	0.421697	0.721486
TCONS_00003102	9712.68	0.165481	0.0569878	2.90379	0.00368672	0.0395141
TCONS_00005407	9692.52	-0.54052	0.0573138	-9.43089	4.0664e-21	6.02189e-19
TCONS_00000217	9685.78	0.215021	0.0589118	3.64988	0.000262364	0.0047216
TCONS_00008079	9679.07	0.099233	0.0666711	1.4884	0.136646	0.419057
TCONS_00007049	9673.12	0.128046	0.057022	2.24555	0.0247331	0.149024
TCONS_00010472	9670.71	-0.151452	0.0543029	-2.78903	0.00528668	0.0513563
TCONS_00012550	9669.03	0.0882272	0.0551827	1.59882	0.109861	0.371442
TCONS_00009691	9648.14	-0.0352659	0.0581543	-0.60642	0.544236	0.800939
TCONS_00006112	9631.74	-0.0567945	0.0553361	-1.02635	0.304725	0.624442
TCONS_00007593	9617.23	-0.144867	0.0598109	-2.42208	0.015432	0.107684
TCONS_00000523	9596.89	0.112441	0.0556084	2.02202	0.0431743	0.215683
TCONS_00007203	9574.97	-0.181688	0.0535214	-3.39468	0.000687096	0.0100855
TCONS_00010943	9559.51	-0.0387353	0.0773708	-0.500645	0.616621	0.837976
TCONS_00002456	9511.19	-0.161167	0.060678	-2.6561	0.00790501	0.0677979
TCONS_00002577	9496.72	-0.0118107	0.0825413	-0.143088	0.88622	0.961696
TCONS_00001003	9482.87	-0.176651	0.0571294	-3.09212	0.00198733	0.0242113
TCONS_00013435	9461.66	-0.0178931	0.0544287	-0.328744	0.74235	0.904887
TCONS_00001176	9445.47	0.0317337	0.0863026	0.367703	0.713095	0.888901
TCONS_00001301	9440.54	0.00724624	0.0808766	0.0895962	0.928608	0.975083
TCONS_00004657	9435.06	0.00844908	0.0648858	0.130215	0.896397	0.96597
TCONS_00004814	9425.41	-0.00915022	0.0540824	-0.16919	0.865647	0.953067
TCONS_00010773	9413.1	-0.16661	0.0533617	-3.12228	0.00179455	0.0224369
TCONS_00012860	9406.1	0.17009	0.058803	2.89254	0.00382146	0.0404225
TCONS_00012020	9396.99	-0.0707956	0.0540289	-1.31033	0.190085	0.499891
TCONS_00000978	9393.5	-0.136278	0.053623	-2.5414	0.0110409	0.0858414
TCONS_00000412	9392.25	-0.0660522	0.0681647	-0.969008	0.332541	0.649431
TCONS_00009402	9380.71	0.00735764	0.0578626	0.127157	0.898816	0.966862
TCONS_00010578	9380.04	0.317718	0.072981	4.35343	1.34024e-05	0.000355831
TCONS_00011305	9374.6	0.0238978	0.0571749	0.417977	0.675964	0.870447
TCONS_00010370	9354.6	-0.030736	0.0598642	-0.513429	0.607651	0.833907
TCONS_00003273	9350.08	0.0165463	0.0560441	0.295237	0.767813	0.915627
TCONS_00000677	9316.78	0.0991799	0.054099	1.83331	0.0667572	0.282099
TCONS_00003976	9313.49	0.0797742	0.0657528	1.21324	0.225036	0.542798
TCONS_00001164	9295.59	-0.0268687	0.050065	-0.536678	0.59149	0.82354
TCONS_00007906	9291.68	0.0775218	0.0652254	1.18852	0.234628	0.552885
TCONS_00011210	9280.69	-0.957011	0.0671687	-14.2479	4.62189e-46	1.33914e-43
TCONS_00008870	9274.83	-0.0603587	0.0609402	-0.990458	0.32195	0.640792
TCONS_00006205	9271.97	-0.0935183	0.0689685	-1.35596	0.175113	0.481051
TCONS_00014161	9254.19	0.018157	0.061218	0.296596	0.766775	0.915627
TCONS_00009539	9209.96	0.0409313	0.0520819	0.785903	0.431924	0.728882
TCONS_00007449	9206.3	-0.0501711	0.0574162	-0.873815	0.382219	0.691738
TCONS_00008034	9204.45	-0.00802456	0.0637821	-0.125812	0.899881	0.967729
TCONS_00001843	9171.33	0.0563769	0.0613665	0.918691	0.358257	0.671946
TCONS_00010537	9168.67	-0.0468096	0.0587552	-0.796689	0.425632	0.724861
TCONS_00007023	9147.29	0.09491	0.058765	1.61508	0.106294	0.364028
TCONS_00012409	9144.98	-0.105321	0.0728356	-1.44602	0.148173	0.435756
TCONS_00001280	9120.37	0.112029	0.0673744	1.66279	0.0963553	0.342419
TCONS_00002142	9089.62	-0.0304611	0.124752	-0.244174	0.807096	0.931693
TCONS_00011213	9074.51	-0.911297	0.0635798	-14.3331	1.35842e-46	4.11478e-44
TCONS_00005950	9066.27	-0.108103	0.0640147	-1.68872	0.0912738	0.3334
TCONS_00001088	9047.4	-0.0674443	0.0601483	-1.1213	0.26216	0.58099
TCONS_00005642	9045.5	0.0275968	0.0606148	0.455281	0.648907	0.854439
TCONS_00004545	9038.04	0.0154329	0.0522369	0.295441	0.767657	0.915627
TCONS_00007370	9018.28	0.279023	0.0693977	4.02064	5.80391e-05	0.00128924
TCONS_00011976	9009.27	-0.0315692	0.0519178	-0.608061	0.543147	0.80074
TCONS_00004907	9006.37	0.0621205	0.0537789	1.15511	0.248046	0.566451
TCONS_00012893	8990.42	0.0217966	0.0594578	0.36659	0.713925	0.889436
TCONS_00001509	8980.47	-0.00853937	0.055364	-0.154241	0.87742	0.956977
TCONS_00008340	8973.46	0.0674976	0.05209	1.29579	0.195049	0.506489
TCONS_00011681	8921.23	0.135544	0.0796876	1.70095	0.0889526	0.329052
TCONS_00011277	8843.43	0.0144613	0.0513124	0.281828	0.778075	0.919664
TCONS_00009315	8824.92	0.0220557	0.0575234	0.383422	0.701407	0.884089
TCONS_00013469	8816.66	-0.102654	0.053139	-1.93181	0.0533836	0.245344
TCONS_00003680	8816.22	0.0939562	0.0533905	1.75979	0.078443	0.307247
TCONS_00011851	8791.32	-0.125376	0.0521788	-2.40282	0.0162693	0.112119
TCONS_00013379	8779.49	-0.114759	0.053791	-2.13342	0.0328906	0.180101
TCONS_00006464	8772.22	0.0872487	0.0539344	1.61768	0.105731	0.363379
TCONS_00012628	8771.22	0.0848548	0.0667339	1.27154	0.203537	0.518845
TCONS_00010749	8753.93	-0.020949	0.0543518	-0.385433	0.699917	0.883858
TCONS_00000767	8747.7	0.208941	0.0892534	2.34098	0.0192331	0.126459
TCONS_00000730	8699.59	0.113331	0.0693623	1.6339	0.102281	0.356052
TCONS_00003496	8689.35	0.0997352	0.0672881	1.48221	0.138284	0.422069
TCONS_00012384	8674.18	-0.0778505	0.0577119	-1.34895	0.177353	0.484365
TCONS_00001443	8672.34	0.0233421	0.0640439	0.364471	0.715506	0.889498
TCONS_00010050	8665.66	-0.141507	0.052737	-2.68327	0.0072907	0.0637601
TCONS_00004219	8664.28	0.150458	0.0678983	2.21593	0.026696	0.156055
TCONS_00003775	8664.09	-0.103	0.0632927	-1.62736	0.103662	0.3583
TCONS_00003524	8657.83	0.0421305	0.0571616	0.737042	0.461097	0.75218
TCONS_00004883	8636.83	-0.0393898	0.0591564	-0.665859	0.505501	0.778426
TCONS_00001261	8622.95	0.18958	0.0696404	2.72227	0.00648349	0.0588806
TCONS_00007073	8606.56	0.0935778	0.0714937	1.30889	0.19057	0.500378
TCONS_00000377	8605.89	-0.00577427	0.134355	-0.0429777	0.965719	0.987529
TCONS_00008373	8597.9	-0.0167325	0.0668826	-0.250178	0.80245	0.929202
TCONS_00003400	8589.4	-0.0482313	0.0672107	-0.717612	0.472996	0.760262
TCONS_00003389	8569.18	0.102001	0.058196	1.75271	0.0796526	0.308936
TCONS_00005266	8555.56	0.158881	0.0574955	2.76336	0.00572088	0.0542955
TCONS_00003185	8552.91	0.149773	0.0539113	2.77814	0.00546707	0.0526482
TCONS_00004223	8543.41	-0.20621	0.0711887	-2.89667	0.00377141	0.0399565
TCONS_00007608	8518.75	-0.108123	0.0510211	-2.11917	0.0340757	0.183873
TCONS_00002501	8499.48	0.0126839	0.0521858	0.243053	0.807965	0.931707
TCONS_00001830	8489.06	-0.120587	0.0546368	-2.20707	0.0273094	0.157703
TCONS_00005627	8481.21	0.0206695	0.0524616	0.393992	0.693587	0.881715
TCONS_00003201	8474.36	0.124594	0.0587247	2.12167	0.0338656	0.183629
TCONS_00008386	8471.77	0.0542213	0.0712129	0.761398	0.44642	0.739538
TCONS_00012708	8468.61	-0.0493969	0.0719088	-0.686937	0.492122	0.77038
TCONS_00011993	8435.95	0.0283146	0.05239	0.540458	0.588881	0.821844
TCONS_00005423	8421.69	0.233121	0.0803936	2.89975	0.00373463	0.0396931
TCONS_00000475	8419.79	-0.214465	0.058499	-3.66614	0.000246243	0.00450815
TCONS_00011190	8414.25	0.0477709	0.0551299	0.866515	0.386208	0.694743
TCONS_00009953	8412.96	0.127562	0.0580729	2.19658	0.0280504	0.160867
TCONS_00013781	8399.64	0.242199	0.0567183	4.27021	1.95291e-05	0.000502479
TCONS_00006254	8377.76	0.00029834	0.0774819	0.00385044	0.996928	0.998918
TCONS_00003094	8355.76	0.0534672	0.0588543	0.908468	0.363631	0.675281
TCONS_00005299	8354.37	0.0267712	0.0681149	0.39303	0.694297	0.881715
TCONS_00003017	8345.17	-0.0841649	0.0543787	-1.54775	0.121681	0.394591
TCONS_00004464	8298.38	-0.13759	0.0583298	-2.35883	0.0183326	0.122348
TCONS_00001289	8279.9	0.00828099	0.0554437	0.149358	0.881271	0.959266
TCONS_00007448	8262.3	0.0140117	0.0613807	0.228275	0.819432	0.936705
TCONS_00005340	8256.25	0.207828	0.0537909	3.86362	0.000111719	0.00222902
TCONS_00001177	8248.15	0.0110243	0.0510398	0.215995	0.828992	0.941053
TCONS_00009325	8242.54	0.099991	0.0534264	1.87157	0.0612667	0.26755
TCONS_00010709	8242.45	0.0983335	0.0568824	1.72872	0.0838601	0.317525
TCONS_00006487	8224.86	0.124744	0.0588995	2.1179	0.0341831	0.183873
TCONS_00000829	8202.29	-0.0823841	0.0570616	-1.44377	0.148802	0.436837
TCONS_00007888	8199.38	0.0830467	0.0536762	1.54718	0.12182	0.394849
TCONS_00001863	8197.37	-0.0400789	0.0711049	-0.563659	0.572987	0.814349
TCONS_00003883	8152.52	0.0319535	0.0591226	0.540462	0.588878	0.821844
TCONS_00005007	8151.85	0.0798511	0.0642858	1.24213	0.21419	0.533119
TCONS_00001766	8149.42	0.104814	0.0524413	1.99869	0.045642	0.224471
TCONS_00001777	8133.29	0.194894	0.0695683	2.80148	0.00508685	0.0499245
TCONS_00002389	8130.96	-0.05907	0.0566252	-1.04317	0.296867	0.618342
TCONS_00002645	8096.99	0.0271934	0.0535532	0.507783	0.611606	0.836198
TCONS_00012493	8089.7	-0.124864	0.0580306	-2.15169	0.0314214	0.174708
TCONS_00001577	8084.54	-0.0366267	0.0649929	-0.563548	0.573062	0.814349
TCONS_00009612	8064.07	-0.00693426	0.0828532	-0.0836934	0.9333	0.976606
TCONS_00009977	8052.72	-0.0526231	0.0569874	-0.923417	0.35579	0.670149
TCONS_00005415	8043	-0.187773	0.0553741	-3.39099	0.000696417	0.0101775
TCONS_00003792	8039.75	0.150158	0.0564738	2.65889	0.00783988	0.0674699
TCONS_00006055	8007.99	0.0579284	0.0627244	0.923538	0.355727	0.670149
TCONS_00006789	8001.24	-0.0679003	0.0647756	-1.04824	0.294528	0.615977
TCONS_00010081	7998.79	-0.00391321	0.0608844	-0.0642728	0.948753	0.980298
TCONS_00004085	7979.23	0.0748541	0.0552728	1.35427	0.175651	0.481901
TCONS_00001267	7975.44	0.128716	0.0571861	2.25082	0.024397	0.148071
TCONS_00000805	7960.69	0.176292	0.0696276	2.53192	0.011344	0.0872937
TCONS_00006883	7948.51	0.0581917	0.0526348	1.10557	0.268911	0.586394
TCONS_00005526	7948	0.161125	0.0554901	2.90367	0.00368814	0.0395141
TCONS_00008007	7923.94	0.0206297	0.0621283	0.332051	0.739851	0.903494
TCONS_00007453	7901.94	0.0980857	0.0605315	1.62041	0.105145	0.361737
TCONS_00009565	7890.87	0.156246	0.0587411	2.65991	0.00781613	0.0673825
TCONS_00001753	7885.17	0.0628479	0.0529833	1.18618	0.235549	0.554188
TCONS_00008479	7865.44	0.0693357	0.0580527	1.19436	0.232338	0.549823
TCONS_00000516	7857.17	-0.584457	0.0660936	-8.84288	9.32853e-19	1.15121e-16
TCONS_00010829	7855.77	0.0206623	0.0571044	0.361835	0.717476	0.890199
TCONS_00001774	7843.36	0.155593	0.064575	2.4095	0.0159744	0.110429
TCONS_00005294	7819.04	0.104829	0.0643812	1.62825	0.103471	0.358011
TCONS_00010052	7815.19	0.248021	0.0632123	3.92361	8.72317e-05	0.0018223
TCONS_00009826	7814.11	-0.115453	0.0685211	-1.68493	0.0920027	0.335214
TCONS_00000233	7802.62	0.00428648	0.0564589	0.0759221	0.939481	0.978999
TCONS_00000668	7794.17	-0.0831204	0.0598466	-1.38889	0.164866	0.463573
TCONS_00005476	7768.25	0.106463	0.063006	1.68973	0.0910804	0.3334
TCONS_00003271	7752.56	0.249444	0.0711776	3.50453	0.000457418	0.00734514
TCONS_00005927	7741.2	-0.0846423	0.133531	-0.63388	0.526159	0.791164
TCONS_00014295	7740.45	-0.103745	0.0715562	-1.44984	0.147104	0.434532
TCONS_00004045	7739.89	0.09145	0.0610684	1.4975	0.134263	0.414225
TCONS_00006421	7723.68	0.0961402	0.0565066	1.7014	0.0888686	0.329011
TCONS_00014071	7710.72	0.0985163	0.0649207	1.51749	0.129144	0.406614
TCONS_00007685	7701.45	0.093169	0.0610653	1.52573	0.127078	0.40403
TCONS_00004755	7680.17	0.0496355	0.0816477	0.607923	0.543239	0.80074
TCONS_00002480	7678.87	0.169776	0.0687712	2.4687	0.0135605	0.098978
TCONS_00010283	7674.02	-0.0510656	0.0521358	-0.979472	0.327347	0.645255
TCONS_00000556	7664.14	-0.591713	0.0672689	-8.79624	1.41471e-18	1.6835e-16
TCONS_00006312	7641	-0.0341206	0.0622143	-0.548437	0.583392	0.818966
TCONS_00003263	7639.8	0.0590209	0.054267	1.0876	0.27677	0.595928
TCONS_00002110	7630.81	0.0886665	0.0558473	1.58766	0.112363	0.376087
TCONS_00006296	7627.39	0.0886447	0.0747865	1.1853	0.235897	0.554188
TCONS_00002663	7602.05	0.0159644	0.0811322	0.19677	0.844007	0.946879
TCONS_00002735	7586.76	-0.00383367	0.0566343	-0.0676916	0.946031	0.979295
TCONS_00000028	7568.7	0.0607787	0.0610853	0.99498	0.319746	0.637814
TCONS_00007793	7553.05	0.0377641	0.0543499	0.694833	0.48716	0.768249
TCONS_00005604	7541.91	0.00880415	0.0555594	0.158464	0.874091	0.955066
TCONS_00010063	7529	0.183219	0.0597826	3.06475	0.00217849	0.0259704
TCONS_00004968	7517.93	-0.0889349	0.0546098	-1.62855	0.103408	0.358011
TCONS_00014561	7501.29	-0.0494189	0.0749363	-0.659479	0.509588	0.781384
TCONS_00006463	7500.21	0.0270809	0.0580335	0.466643	0.640756	0.851022
TCONS_00003146	7478.85	-0.0603063	0.0761688	-0.791745	0.428509	0.726612
TCONS_00008147	7471.85	-0.0166195	0.0760163	-0.21863	0.826938	0.940235
TCONS_00005382	7468.88	-0.00581785	0.068989	-0.0843301	0.932794	0.976511
TCONS_00010100	7464.36	-0.0308794	0.0617262	-0.500264	0.616889	0.837976
TCONS_00001305	7421.21	-0.0324072	0.055508	-0.583829	0.559335	0.807323
TCONS_00004746	7415.2	0.101437	0.0620004	1.63606	0.101826	0.355458
TCONS_00007539	7400.4	-0.0529361	0.0743955	-0.71155	0.476744	0.762574
TCONS_00003238	7362.49	-0.183055	0.0706219	-2.59204	0.00954081	0.0779166
TCONS_00010307	7358.14	0.118552	0.0527356	2.24804	0.0245735	0.148398
TCONS_00000881	7341.54	-0.000107276	0.0616514	-0.00174004	0.998612	0.999332
TCONS_00002252	7338.46	0.12759	0.060479	2.10966	0.034888	0.185846
TCONS_00008186	7338.26	-0.0159676	0.0519944	-0.307102	0.758766	0.912017
TCONS_00004370	7320.57	0.11	0.0672924	1.63466	0.10212	0.355924
TCONS_00003037	7315.61	-0.00998732	0.055525	-0.179871	0.857254	0.950501
TCONS_00002320	7293.75	-0.214849	0.0566647	-3.79158	0.000149691	0.00289982
TCONS_00011429	7285.65	-0.0804423	0.0568005	-1.41623	0.15671	0.448408
TCONS_00007865	7281.59	0.0509391	0.0574349	0.886901	0.375132	0.684524
TCONS_00003236	7275.96	0.00640638	0.0587159	0.109108	0.913117	0.972314
TCONS_00011508	7274.18	-0.100136	0.0559	-1.79134	0.0732384	0.29558
TCONS_00009764	7256.27	-0.1173	0.0624445	-1.87846	0.060318	0.265949
TCONS_00002671	7250.48	0.0795446	0.0684788	1.16159	0.2454	0.564107
TCONS_00009576	7243.88	0.248196	0.0892072	2.78225	0.00539838	0.0522186
TCONS_00007058	7242.99	-0.183608	0.0729862	-2.51566	0.011881	0.0903827
TCONS_00007486	7241.46	0.104408	0.0640894	1.62911	0.103291	0.358004
TCONS_00009297	7229.52	-0.0345794	0.0635903	-0.543784	0.58659	0.820467
TCONS_00010588	7229.1	0.0359839	0.0564763	0.637151	0.524027	0.790637
TCONS_00003684	7229.09	-0.0507118	0.055396	-0.915441	0.35996	0.672491
TCONS_00000250	7207.41	0.0866979	0.0630739	1.37454	0.169273	0.47175
TCONS_00000210	7205	0.0325247	0.0551058	0.590223	0.555041	0.804436
TCONS_00008658	7196	-0.0256989	0.070751	-0.363231	0.716432	0.889567
TCONS_00004556	7178.9	0.261159	0.0586603	4.45206	8.50516e-06	0.000244303
TCONS_00002935	7172.02	-0.119307	0.0539309	-2.21222	0.0269516	0.15645
TCONS_00002967	7149.72	-0.077506	0.0731342	-1.05978	0.289246	0.610274
TCONS_00010193	7133.07	0.0996036	0.0565098	1.76259	0.0779696	0.305821
TCONS_00007841	7132.68	0.053016	0.0687629	0.770998	0.440708	0.735139
TCONS_00014517	7132.04	-0.462882	0.0741091	-6.24595	4.21226e-10	2.62341e-08
TCONS_00004177	7122.57	-0.0529698	0.0579528	-0.914017	0.360708	0.672634
TCONS_00006651	7110.33	0.0814186	0.060668	1.34204	0.179584	0.486088
TCONS_00012087	7108.39	0.0112841	0.0572069	0.197251	0.843631	0.946776
TCONS_00006295	7106.5	0.0369212	0.0537653	0.68671	0.492265	0.770422
TCONS_00013004	7103.62	-0.171094	0.0795782	-2.15001	0.0315547	0.175046
TCONS_00005965	7086.56	0.0163935	0.0525823	0.311768	0.755217	0.910743
TCONS_00005309	7053.54	-0.0316384	0.054988	-0.575369	0.565042	0.810993
TCONS_00009128	7048.32	0.0652871	0.0798944	0.817168	0.413833	0.714821
TCONS_00003095	7033.19	0.154776	0.0694078	2.22995	0.0257509	0.152131
TCONS_00008510	7033.12	0.145617	0.0657822	2.21362	0.0268549	0.156253
TCONS_00003695	6992.96	0.0761927	0.0565316	1.34779	0.177727	0.484603
TCONS_00000448	6991.92	0.12729	0.0556705	2.28649	0.0222255	0.139605
TCONS_00014293	6974.71	-0.115471	0.0651262	-1.77304	0.0762224	0.301631
TCONS_00002446	6967.95	-0.173952	0.067332	-2.5835	0.00978026	0.0795796
TCONS_00000222	6950.96	0.0674272	0.0549398	1.22729	0.219712	0.537975
TCONS_00011948	6943.61	-0.0383269	0.0836096	-0.458403	0.646663	0.853732
TCONS_00001769	6942.76	0.223284	0.0677281	3.29678	0.000978017	0.0135218
TCONS_00001401	6937.16	-0.12748	0.0545899	-2.33523	0.0195315	0.127731
TCONS_00012200	6893.45	0.184496	0.0666171	2.7695	0.00561429	0.0535245
TCONS_00003450	6874.54	-0.150253	0.0534099	-2.8132	0.00490512	0.0486425
TCONS_00001840	6850.86	-0.0593705	0.0553701	-1.07225	0.283608	0.604209
TCONS_00007312	6833.49	0.139423	0.0533371	2.61399	0.00894913	0.0741824
TCONS_00000603	6819.08	0.0146344	0.0563604	0.259656	0.795129	0.925449
TCONS_00002269	6802.91	0.0443084	0.0576408	0.768699	0.442072	0.736124
TCONS_00000847	6798.53	-0.311364	0.056433	-5.51741	3.44027e-08	1.59208e-06
TCONS_00005349	6792.57	0.135451	0.0629577	2.15146	0.0314399	0.174708
TCONS_00003189	6790.98	0.130921	0.0887519	1.47514	0.140175	0.425022
TCONS_00013296	6787.67	-0.00238067	0.0683768	-0.0348169	0.972226	0.990628
TCONS_00010285	6766.64	-0.0580334	0.0698345	-0.831013	0.405967	0.708254
TCONS_00006845	6748.73	0.0862715	0.0544401	1.5847	0.113034	0.377761
TCONS_00003718	6738.63	-0.00185448	0.0644388	-0.0287789	0.977041	0.991322
TCONS_00011005	6737.8	-0.100211	0.0547003	-1.83201	0.0669503	0.282452
TCONS_00009463	6706.2	-0.018916	0.0754321	-0.250769	0.801993	0.929202
TCONS_00001198	6688.29	0.0396329	0.0684856	0.578704	0.562789	0.809022
TCONS_00008669	6682.83	-0.0756117	0.0604998	-1.24978	0.211378	0.530225
TCONS_00003023	6682.38	0.191877	0.0683545	2.80708	0.00499922	0.0492384
TCONS_00005394	6642.25	0.160197	0.0609418	2.62869	0.00857144	0.0721213
TCONS_00011424	6639.87	-0.0570297	0.0693717	-0.822089	0.411026	0.712004
TCONS_00008806	6629.66	0.018627	0.0628194	0.296517	0.766835	0.915627
TCONS_00005999	6625.47	0.00457162	0.0648649	0.0704791	0.943812	0.979197
TCONS_00005993	6609.29	0.129205	0.056881	2.2715	0.0231167	0.142903
TCONS_00010564	6599.64	-0.190882	0.0557648	-3.42298	0.000619391	0.00929645
TCONS_00003257	6584.85	0.0129429	0.0584019	0.221617	0.824612	0.939718
TCONS_00010284	6546.73	-0.0456843	0.0528665	-0.864144	0.387509	0.694743
TCONS_00012665	6540.44	-0.0266958	0.0668107	-0.399573	0.689471	0.879019
TCONS_00003004	6522.41	0.0541915	0.0595189	0.910492	0.362563	0.674894
TCONS_00010275	6522.24	0.101165	0.0536056	1.88721	0.0591318	0.262004
TCONS_00001422	6520.43	-0.142169	0.0562917	-2.52558	0.0115509	0.0884851
TCONS_00007437	6497.14	0.181368	0.0710327	2.5533	0.0106708	0.0839555
TCONS_00008703	6490.27	0.130828	0.0572893	2.28364	0.0223926	0.13985
TCONS_00008238	6472.56	0.180788	0.068213	2.65034	0.00804111	0.0685369
TCONS_00001824	6471.74	-0.129761	0.0643109	-2.01771	0.0436211	0.217161
TCONS_00001201	6457.3	-0.0397179	0.057721	-0.688102	0.491389	0.769994
TCONS_00003871	6449.82	0.14282	0.0829819	1.7211	0.085232	0.320749
TCONS_00005459	6433.1	-0.253799	0.0686558	-3.69669	0.000218426	0.00407322
TCONS_00001241	6429.52	0.0126201	0.0651689	0.193652	0.846448	0.948341
TCONS_00005487	6411.76	0.143774	0.0542306	2.65116	0.00802161	0.0685333
TCONS_00008839	6397.71	-0.095771	0.0561498	-1.70563	0.0880762	0.326986
TCONS_00001102	6381.59	0.0822919	0.0538284	1.52878	0.126318	0.403112
TCONS_00011179	6373.64	0.105059	0.0580331	1.81033	0.0702444	0.288115
TCONS_00006357	6368.31	0.0396717	0.0574795	0.690188	0.490076	0.769521
TCONS_00011636	6360.03	-0.0555614	0.0662221	-0.839017	0.40146	0.705086
TCONS_00000067	6358.43	0.174901	0.0602902	2.90099	0.00371986	0.0396606
TCONS_00011241	6352.99	0.0284697	0.0579956	0.490895	0.623501	0.84148
TCONS_00002344	6335.05	0.0156309	0.0587328	0.266135	0.790135	0.92371
TCONS_00014330	6309.12	0.0422479	0.0840508	0.502648	0.615212	0.837976
TCONS_00013889	6308.18	-0.0732974	0.0622983	-1.17655	0.239373	0.557292
TCONS_00003431	6304.92	-0.0102259	0.055903	-0.182922	0.854859	0.950097
TCONS_00005629	6288.41	0.13566	0.0527576	2.57138	0.0101295	0.0814269
TCONS_00003478	6284.87	0.0561067	0.061674	0.909729	0.362965	0.675241
TCONS_00005796	6282.57	0.0792811	0.0546694	1.45019	0.147005	0.434532
TCONS_00011648	6280.92	0.114887	0.0540579	2.12526	0.0335649	0.182593
TCONS_00010033	6267.2	0.18682	0.0586912	3.1831	0.00145707	0.0190391
TCONS_00002954	6238.72	0.15943	0.0718692	2.21833	0.0265322	0.155369
TCONS_00011500	6232.32	-0.0671458	0.0535155	-1.2547	0.209589	0.527654
TCONS_00011746	6230.7	-0.0375751	0.0673247	-0.558117	0.576764	0.816215
TCONS_00001517	6208.55	0.112981	0.0562775	2.00758	0.0446882	0.220922
TCONS_00005834	6207.84	0.0401366	0.0654435	0.613302	0.539677	0.799295
TCONS_00013470	6202.15	0.120789	0.0557183	2.16784	0.0301706	0.169668
TCONS_00002877	6195.21	0.175898	0.0714664	2.46127	0.0138445	0.10072
TCONS_00007799	6194.55	-0.0367648	0.0610818	-0.601894	0.547245	0.801625
TCONS_00008411	6185.3	-0.0174164	0.0738217	-0.235925	0.813491	0.934498
TCONS_00007115	6178.12	0.103046	0.0732334	1.40708	0.159402	0.453762
TCONS_00002364	6175.06	-0.0769397	0.057115	-1.3471	0.177948	0.484809
TCONS_00008867	6114.28	-0.0130345	0.0592647	-0.219937	0.82592	0.939718
TCONS_00011656	6106.13	0.103836	0.0583054	1.78089	0.0749298	0.298644
TCONS_00003264	6083.15	0.231658	0.0604828	3.83015	0.000128065	0.00252492
TCONS_00000798	6079.59	-0.0313479	0.0536251	-0.584575	0.558833	0.807248
TCONS_00002664	6072.21	-0.0234719	0.0556899	-0.421475	0.673408	0.869072
TCONS_00012491	6069.56	-0.0379201	0.061672	-0.614867	0.538643	0.799295
TCONS_00006305	6051.79	0.286094	0.0557684	5.13003	2.8969e-07	1.10948e-05
TCONS_00011587	6023.03	0.00714556	0.0699971	0.102084	0.91869	0.973333
TCONS_00006409	6020.58	-0.783865	0.0589506	-13.297	2.41003e-40	6.1771e-38
TCONS_00011653	6014.74	0.103067	0.060103	1.71484	0.086375	0.32301
TCONS_00011857	6006	0.0347123	0.061109	0.568039	0.570009	0.814127
TCONS_00009811	6002.38	0.0568699	0.0569249	0.999034	0.317778	0.635315
TCONS_00002550	6000.24	-0.122386	0.0599862	-2.04024	0.0413266	0.208953
TCONS_00003009	5996.8	0.0332835	0.0715375	0.465259	0.641746	0.851572
TCONS_00008667	5996.79	-0.0245133	0.0673552	-0.363941	0.715902	0.889498
TCONS_00011909	5993.97	0.0851329	0.0587127	1.44999	0.147061	0.434532
TCONS_00007664	5988.6	0.167918	0.05547	3.02719	0.00246839	0.0287074
TCONS_00011820	5984.16	0.123986	0.055542	2.23229	0.0255957	0.151617
TCONS_00009123	5974.67	0.28874	0.0634829	4.54831	5.40778e-06	0.00016684
TCONS_00014880	5970.22	0.0463496	0.0625533	0.740962	0.458716	0.750525
TCONS_00005132	5956.33	0.105508	0.0578822	1.82281	0.0683323	0.284726
TCONS_00006422	5940.79	0.168953	0.0682141	2.4768	0.0132565	0.0976146
TCONS_00011171	5903.53	0.100827	0.059653	1.69023	0.0909835	0.3334
TCONS_00010341	5900.05	-0.0426757	0.0552388	-0.772568	0.439778	0.734507
TCONS_00005381	5899.54	0.060855	0.0728637	0.83519	0.403611	0.706505
TCONS_00004884	5894.47	0.0778839	0.0564349	1.38007	0.167566	0.469327
TCONS_00006720	5886.66	0.0663247	0.0555677	1.19358	0.232641	0.550149
TCONS_00001087	5885.88	0.0689676	0.0677258	1.01834	0.308518	0.628928
TCONS_00002314	5882.57	0.0330684	0.0566071	0.584174	0.559103	0.807248
TCONS_00009836	5876.89	0.00331202	0.0595533	0.0556144	0.955649	0.982797
TCONS_00008976	5859.88	-0.0246245	0.0575704	-0.427729	0.668848	0.865813
TCONS_00006816	5845.79	0.0320351	0.0630679	0.507946	0.611491	0.836198
TCONS_00008563	5834.23	0.00481623	0.0607958	0.0792198	0.936858	0.978187
TCONS_00005473	5828.06	0.00523394	0.0629991	0.0830797	0.933788	0.976733
TCONS_00010722	5826.79	-0.0508332	0.0621873	-0.817421	0.413688	0.714757
TCONS_00002513	5824.62	0.116016	0.0694553	1.67037	0.0948471	0.340184
TCONS_00008140	5814.9	-0.00800849	0.0722476	-0.110848	0.911737	0.971787
TCONS_00011010	5809.9	0.207493	0.0569531	3.64323	0.000269241	0.00481025
TCONS_00008085	5807.27	0.0849337	0.0732194	1.15999	0.246053	0.564512
TCONS_00010702	5805.34	-0.202059	0.0537118	-3.76191	0.000168623	0.00321979
TCONS_00002429	5787.54	-0.0702574	0.0579311	-1.21278	0.225216	0.542798
TCONS_00011276	5763.86	0.125423	0.0748922	1.67471	0.0939906	0.338386
TCONS_00005804	5758	0.186528	0.06967	2.6773	0.00742172	0.0645671
TCONS_00005174	5749.93	0.11666	0.0601576	1.93924	0.052472	0.242997
TCONS_00006440	5748.28	0.100323	0.0535777	1.87247	0.0611412	0.26755
TCONS_00008167	5744.58	0.0286489	0.0571281	0.501486	0.616029	0.837976
TCONS_00009872	5735.66	0.0875334	0.0694656	1.2601	0.207634	0.525114
TCONS_00010837	5727.37	0.0372946	0.0544067	0.685478	0.493042	0.770492
TCONS_00014136	5717.99	-0.00502286	0.0595433	-0.0843566	0.932773	0.976511
TCONS_00008348	5715.86	-0.0261085	0.0533048	-0.489797	0.624278	0.841632
TCONS_00007527	5712.9	-0.15022	0.0580517	-2.58769	0.00966227	0.0787156
TCONS_00000304	5706.17	-0.118464	0.0657457	-1.80186	0.0715677	0.291164
TCONS_00007309	5702.45	-0.0821156	0.0847748	-0.968632	0.332729	0.649431
TCONS_00007625	5691.98	0.0187203	0.0575169	0.325475	0.744822	0.905409
TCONS_00001258	5657.88	-0.000774	0.0606276	-0.0127665	0.989814	0.996282
TCONS_00004602	5650.35	0.117827	0.0585179	2.01351	0.0440606	0.218305
TCONS_00014032	5649.04	-0.00145308	0.0586352	-0.0247816	0.980229	0.992263
TCONS_00013302	5648.25	0.102954	0.066021	1.55942	0.118897	0.389543
TCONS_00008155	5641.02	-0.145382	0.0643498	-2.25925	0.0238677	0.146324
TCONS_00001622	5624.73	-0.0198848	0.054577	-0.364343	0.715602	0.889498
TCONS_00009383	5621.54	0.0679381	0.0621148	1.09375	0.274065	0.59144
TCONS_00013020	5619.28	-0.0326872	0.0560211	-0.583481	0.55957	0.807487
TCONS_00001175	5610.88	0.173867	0.0667139	2.60616	0.00915649	0.075239
TCONS_00005040	5601.98	-0.0171548	0.0616064	-0.278458	0.780661	0.919951
TCONS_00007578	5599.8	0.0729564	0.0559532	1.30388	0.192273	0.502672
TCONS_00007356	5598.17	0.0329814	0.0658106	0.501156	0.616261	0.837976
TCONS_00003796	5594.48	0.0706018	0.0669077	1.05521	0.291329	0.612925
TCONS_00009052	5585.8	0.21487	0.0701637	3.0624	0.00219568	0.0261285
TCONS_00010433	5580.71	0.225626	0.0558037	4.04322	5.27229e-05	0.001191
TCONS_00012835	5559.21	0.090754	0.069044	1.31444	0.188699	0.498683
TCONS_00009405	5556	0.201055	0.0708779	2.83664	0.00455913	0.0457561
TCONS_00011316	5554.65	0.0317599	0.0655892	0.484225	0.628226	0.843236
TCONS_00006668	5554.64	0.147387	0.0544401	2.70732	0.00678287	0.0607541
TCONS_00001384	5554.51	0.0725467	0.0605475	1.19818	0.230847	0.548778
TCONS_00000548	5552.53	0.228039	0.0597683	3.81538	0.000135973	0.00266506
TCONS_00003108	5550.13	-0.00123121	0.0599738	-0.0205292	0.983621	0.993911
TCONS_00005749	5541.04	0.0916212	0.0593094	1.5448	0.122395	0.396325
TCONS_00004716	5522.08	0.120404	0.057476	2.09486	0.0361836	0.190842
TCONS_00000641	5508.42	0.212091	0.0569528	3.72397	0.000196112	0.00369179
TCONS_00002612	5502.36	-0.152224	0.057403	-2.65184	0.00800546	0.0684832
TCONS_00004700	5468.57	0.0772344	0.0616705	1.25237	0.210434	0.528983
TCONS_00012612	5443.63	-0.104069	0.062026	-1.67782	0.093382	0.338205
TCONS_00000014	5442.95	-0.0589019	0.0642487	-0.91678	0.359258	0.672269
TCONS_00001788	5441.96	0.0998967	0.0702687	1.42164	0.155131	0.44541
TCONS_00012682	5438.82	-0.0202291	0.0756825	-0.267289	0.789247	0.923699
TCONS_00009566	5431.77	0.0310138	0.0608804	0.509422	0.610457	0.835679
TCONS_00000675	5428.79	0.187398	0.0601432	3.11586	0.00183409	0.0226941
TCONS_00000065	5428.33	0.0775789	0.0655293	1.18388	0.236461	0.555045
TCONS_00003097	5422.46	0.212794	0.0601917	3.53527	0.000407361	0.00671944
TCONS_00004217	5415	0.0565126	0.0673658	0.838891	0.401531	0.705086
TCONS_00006868	5409.91	0.0874505	0.0560639	1.55983	0.118799	0.389543
TCONS_00002463	5409.76	-0.271094	0.0673171	-4.02712	5.64638e-05	0.00125844
TCONS_00003032	5395.84	0.0340487	0.0549761	0.619336	0.535695	0.796444
TCONS_00004754	5369.23	0.123853	0.0573907	2.15807	0.0309222	0.172729
TCONS_00010059	5350.73	-0.174407	0.0716066	-2.43562	0.0148663	0.10528
TCONS_00012872	5350.37	0.121232	0.0655272	1.85011	0.0642983	0.276505
TCONS_00001247	5346.8	-0.0272956	0.064491	-0.423246	0.672116	0.868584
TCONS_00009632	5345.18	-0.136471	0.0704215	-1.93792	0.052633	0.243405
TCONS_00001350	5342.87	-0.109059	0.0666778	-1.63562	0.10192	0.355486
TCONS_00008894	5342.78	0.0596863	0.0598118	0.997902	0.318327	0.63589
TCONS_00009425	5313.19	0.123735	0.0562958	2.19795	0.0279528	0.160446
TCONS_00000607	5308.89	0.135778	0.0606506	2.23869	0.0251764	0.150508
TCONS_00003904	5304.87	-0.0584505	0.0579723	-1.00825	0.313335	0.632519
TCONS_00010008	5304.75	-0.238685	0.0581	-4.10817	3.98805e-05	0.000945779
TCONS_00005589	5279.93	-0.0357666	0.0599379	-0.596728	0.550689	0.802579
TCONS_00003294	5279.03	0.0968192	0.0592722	1.63347	0.10237	0.356052
TCONS_00001540	5277.91	0.117347	0.0753782	1.55677	0.119524	0.390829
TCONS_00008625	5259.75	0.0657956	0.0680887	0.966321	0.333883	0.649838
TCONS_00013996	5241.5	-0.151219	0.0680958	-2.22069	0.0263721	0.15484
TCONS_00007692	5237.64	-0.0174589	0.0652026	-0.267763	0.788881	0.923433
TCONS_00009827	5229.9	0.109173	0.0656099	1.66397	0.0961188	0.342214
TCONS_00004102	5228.88	0.105611	0.0677986	1.55772	0.119299	0.390285
TCONS_00006196	5215.79	-0.0024379	0.07526	-0.032393	0.974159	0.990726
TCONS_00014075	5208.74	-0.245814	0.0853207	-2.88106	0.00396344	0.0415943
TCONS_00001450	5185.31	0.167967	0.0738291	2.27508	0.0229008	0.141832
TCONS_00000626	5166.7	0.0419793	0.066104	0.635049	0.525397	0.791164
TCONS_00010465	5164.8	0.157265	0.0761597	2.06494	0.0389285	0.200169
TCONS_00013381	5155.48	0.116356	0.0584942	1.98919	0.0466807	0.227271
TCONS_00010215	5154.91	-0.0588991	0.0736508	-0.799707	0.42388	0.72355
TCONS_00000393	5153.78	0.131014	0.0910866	1.43835	0.150336	0.439277
TCONS_00007946	5135.53	0.0469071	0.0642881	0.729639	0.465611	0.754538
TCONS_00012645	5135.37	-0.319752	0.0648485	-4.93076	8.19105e-07	2.8729e-05
TCONS_00002277	5133.46	0.197522	0.0762407	2.59077	0.00957625	0.0781103
TCONS_00006468	5124.7	0.0893406	0.0614334	1.45427	0.145872	0.433583
TCONS_00006460	5082.07	0.131714	0.0661038	1.99252	0.0463136	0.226271
TCONS_00011814	5081.11	0.0340233	0.0636748	0.534329	0.593114	0.824491
TCONS_00001720	5060.89	0.21886	0.0628894	3.48007	0.000501281	0.0078316
TCONS_00007602	5050.6	-0.0223227	0.0657579	-0.339468	0.734258	0.901288
TCONS_00010679	5046.97	-0.262343	0.0584496	-4.48836	7.17737e-06	0.000216425
TCONS_00005767	5020.29	0.0309728	0.0550213	0.562924	0.573487	0.814349
TCONS_00002212	5006.28	-0.101863	0.0578741	-1.76008	0.078395	0.307247
TCONS_00002730	4990.49	0.114953	0.0862909	1.33216	0.182809	0.491028
TCONS_00011627	4988.54	-0.109331	0.0625057	-1.74913	0.0802684	0.310813
TCONS_00009028	4979.34	0.132179	0.0571373	2.31335	0.0207032	0.133172
TCONS_00014879	4976.73	0.0261147	0.0929862	0.280845	0.778829	0.919664
TCONS_00000608	4973.49	0.0186225	0.0627266	0.296883	0.766556	0.915627
TCONS_00007994	4954.6	0.0685361	0.0561515	1.22056	0.222254	0.54059
TCONS_00003147	4954.57	0.00969457	0.0877636	0.110462	0.912043	0.971787
TCONS_00006226	4944.72	-0.0353249	0.0611433	-0.577739	0.56344	0.809674
TCONS_00011097	4944.14	-0.0994938	0.0592055	-1.68048	0.0928638	0.337235
TCONS_00001461	4918.03	0.215546	0.0558855	3.85693	0.000114821	0.00228407
TCONS_00002053	4915.8	-0.0356395	0.0596014	-0.597964	0.549864	0.80232
TCONS_00006633	4914.41	-0.0972492	0.0565708	-1.71907	0.0856013	0.321718
TCONS_00000419	4913.79	0.230127	0.0726707	3.16672	0.00154171	0.0199495
TCONS_00009306	4911.51	0.230128	0.0566836	4.05986	4.91017e-05	0.00112445
TCONS_00014375	4889.76	0.0247312	0.0660673	0.374334	0.708156	0.887893
TCONS_00001339	4889.65	0.0136837	0.068446	0.19992	0.841543	0.946568
TCONS_00008342	4886.15	-0.120146	0.0605629	-1.98383	0.0472752	0.229288
TCONS_00008747	4884.08	0.180034	0.0614982	2.92748	0.00341726	0.0372102
TCONS_00012610	4870.26	0.391331	0.0727952	5.37578	7.62522e-08	3.29964e-06
TCONS_00014860	4850.28	-0.00657755	0.0811399	-0.0810643	0.935391	0.977642
TCONS_00003943	4849.2	0.0584483	0.0583222	1.00216	0.316265	0.634859
TCONS_00009770	4846.39	0.0805082	0.0661951	1.21622	0.223899	0.541978
TCONS_00012103	4840.34	-0.0677482	0.056068	-1.20832	0.226923	0.54514
TCONS_00009557	4836.97	0.224974	0.0655289	3.4332	0.000596501	0.0089934
TCONS_00000289	4831.61	0.0861761	0.0671093	1.28411	0.199102	0.512284
TCONS_00010363	4829.93	0.0886873	0.0562238	1.5774	0.114704	0.380909
TCONS_00000837	4827.72	0.1615	0.0573195	2.81754	0.00483925	0.0481325
TCONS_00002555	4819.23	-0.0378803	0.0582365	-0.650457	0.515397	0.784776
TCONS_00003013	4808.26	0.28113	0.0701211	4.00921	6.09232e-05	0.00133991
TCONS_00002643	4803.77	0.0470247	0.0617517	0.761513	0.446351	0.739538
TCONS_00008097	4796.04	0.0583425	0.0631083	0.924482	0.355235	0.669861
TCONS_00004609	4794.05	0.0120815	0.0583838	0.206932	0.836063	0.944294
TCONS_00003206	4790.84	-0.0819346	0.0684807	-1.19646	0.231516	0.548778
TCONS_00014135	4777.07	-0.00935649	0.0581276	-0.160965	0.872121	0.954496
TCONS_00008898	4764.77	0.0242449	0.0653885	0.370783	0.7108	0.8882
TCONS_00008467	4759.9	0.0302151	0.0699193	0.432142	0.665638	0.863839
TCONS_00003381	4759.46	-0.133318	0.0810643	-1.6446	0.100052	0.351725
TCONS_00007964	4746.02	0.12367	0.0624929	1.97894	0.0478226	0.231438
TCONS_00001496	4742.5	-0.112227	0.057649	-1.94673	0.0515672	0.241154
TCONS_00011115	4740.12	-0.0199883	0.0633332	-0.315606	0.752302	0.90913
TCONS_00014023	4740.01	0.131515	0.0675491	1.94695	0.0515412	0.241154
TCONS_00009443	4730.22	0.0729954	0.0635573	1.1485	0.250764	0.569104
TCONS_00000118	4725.36	0.10096	0.0571358	1.76702	0.0772256	0.303797
TCONS_00004661	4722.63	-0.0744308	0.0613536	-1.21315	0.225074	0.542798
TCONS_00009634	4721.56	0.00585311	0.0697257	0.0839448	0.9331	0.976606
TCONS_00000547	4721.46	-0.0892905	0.0590237	-1.51279	0.130333	0.409023
TCONS_00009224	4685.56	0.137113	0.0730163	1.87784	0.0604027	0.265949
TCONS_00002017	4680.73	0.099613	0.0645655	1.54282	0.122874	0.397313
TCONS_00001844	4677.71	-0.0224764	0.0560475	-0.401024	0.688402	0.878329
TCONS_00013133	4677.61	-0.375114	0.0654066	-5.73511	9.74491e-09	5.03411e-07
TCONS_00005970	4676.48	-0.02868	0.0755857	-0.379437	0.704364	0.885805
TCONS_00007604	4667.61	0.0518677	0.063256	0.819965	0.412236	0.713358
TCONS_00004039	4661.1	0.0357658	0.0594606	0.601505	0.547504	0.801625
TCONS_00007372	4641.12	0.11422	0.0681348	1.67639	0.0936622	0.338301
TCONS_00011148	4641.04	-0.048672	0.0585772	-0.830903	0.406028	0.708254
TCONS_00001009	4634.66	-0.00918156	0.0636143	-0.144332	0.885238	0.961413
TCONS_00000872	4629.59	-0.00351204	0.0602691	-0.0582726	0.953531	0.981918
TCONS_00008645	4625.89	0.0486355	0.0723675	0.672062	0.501544	0.775114
TCONS_00000269	4624.4	0.13204	0.0745463	1.77125	0.0765187	0.302086
TCONS_00009454	4623.3	-0.00640616	0.07112	-0.0900754	0.928227	0.975048
TCONS_00003595	4609.23	0.0113313	0.0603567	0.187739	0.851082	0.949352
TCONS_00001928	4608.01	-0.0821126	0.0552363	-1.48657	0.137129	0.419957
TCONS_00011302	4607.58	-0.0165015	0.0780284	-0.21148	0.832512	0.942232
TCONS_00000596	4604.82	0.126172	0.0580732	2.17263	0.0298079	0.168339
TCONS_00001730	4604.04	0.0228211	0.070432	0.324016	0.745926	0.906263
TCONS_00008759	4603.76	-0.114704	0.0666476	-1.72105	0.0852412	0.320749
TCONS_00003950	4591.51	0.0414495	0.0580733	0.713744	0.475386	0.761898
TCONS_00000004	4584.36	-0.0742619	0.0596677	-1.24459	0.213282	0.531807
TCONS_00012977	4584.2	-0.0224801	0.0622749	-0.360981	0.718113	0.89027
TCONS_00007077	4574.31	-0.0100543	0.0644109	-0.156096	0.875957	0.955712
TCONS_00001975	4567	0.109177	0.0584717	1.86717	0.0618776	0.269481
TCONS_00013992	4566.81	-0.147717	0.0632272	-2.33629	0.0194763	0.127495
TCONS_00014417	4563.99	-0.130867	0.0613155	-2.13432	0.0328165	0.179845
TCONS_00007264	4559.25	-0.0166647	0.0617386	-0.269923	0.787219	0.922677
TCONS_00012551	4558.28	0.0405219	0.0697622	0.580858	0.561336	0.80846
TCONS_00004475	4555.31	-0.00247685	0.0631928	-0.0391951	0.968735	0.98922
TCONS_00005784	4550.67	-0.0807481	0.0664041	-1.21601	0.223981	0.541979
TCONS_00001010	4526.77	0.0360059	0.065806	0.547153	0.584274	0.81907
TCONS_00006697	4519.6	0.0165824	0.0571672	0.290069	0.771763	0.917961
TCONS_00014564	4515.03	-0.0365869	0.0575698	-0.635522	0.525088	0.791135
TCONS_00001193	4510.49	-0.0649028	0.0609332	-1.06515	0.286809	0.607339
TCONS_00005595	4503.81	-0.150881	0.0640485	-2.35573	0.0184861	0.123069
TCONS_00000013	4500.9	0.00122975	0.0602159	0.0204224	0.983706	0.993911
TCONS_00012606	4495.07	0.0622235	0.0621434	1.00129	0.316687	0.634859
TCONS_00009222	4492.76	0.0920094	0.0605702	1.51905	0.128749	0.406053
TCONS_00006390	4474.9	-0.0328288	0.0729603	-0.449955	0.652743	0.857506
TCONS_00007523	4463.91	0.0442994	0.0638445	0.693864	0.487768	0.768436
TCONS_00010177	4462.89	0.0791219	0.0885662	0.893364	0.371662	0.681363
TCONS_00001151	4462.32	-0.0819779	0.0620695	-1.32074	0.186586	0.496174
TCONS_00003243	4459.4	0.0728355	0.0859758	0.847162	0.396905	0.70149
TCONS_00008052	4456.43	0.0519238	0.0826354	0.628348	0.529776	0.792286
TCONS_00004604	4456.07	0.0924045	0.0606235	1.52424	0.12745	0.40463
TCONS_00004642	4438.53	-0.0475154	0.0703066	-0.675831	0.499148	0.774103
TCONS_00005200	4438.35	-0.0349591	0.08644	-0.404433	0.685895	0.876808
TCONS_00004561	4430.92	0.0753419	0.0744002	1.01266	0.311224	0.631127
TCONS_00011464	4428.84	-0.155746	0.0614202	-2.53574	0.0112211	0.086648
TCONS_00001709	4420.76	0.0173672	0.0762132	0.227877	0.819742	0.936705
TCONS_00010621	4420.44	-0.200495	0.0894106	-2.24241	0.0249348	0.149969
TCONS_00003622	4413.55	-0.0266826	0.0818262	-0.326088	0.744358	0.905182
TCONS_00006632	4409.87	0.000776642	0.0629242	0.0123425	0.990152	0.996282
TCONS_00002069	4387.58	-0.298761	0.0638578	-4.67853	2.88933e-06	9.25698e-05
TCONS_00002336	4383.39	-0.0265941	0.065675	-0.404934	0.685526	0.876673
TCONS_00005673	4379.88	-0.038052	0.0777496	-0.489417	0.624546	0.841711
TCONS_00008474	4367.56	-0.120915	0.0836082	-1.44621	0.148119	0.435756
TCONS_00006450	4361	-0.316348	0.0628313	-5.03489	4.78131e-07	1.78004e-05
TCONS_00005035	4360.26	0.124329	0.061042	2.03678	0.041672	0.210221
TCONS_00004194	4355.11	0.0743821	0.0631969	1.17699	0.239199	0.557292
TCONS_00004366	4347.02	0.136341	0.0814809	1.67329	0.0942697	0.339025
TCONS_00000698	4334.8	0.055469	0.0743235	0.746319	0.455475	0.746871
TCONS_00007596	4305.99	0.101407	0.0648482	1.56376	0.117874	0.387716
TCONS_00013124	4296.67	0.0584444	0.0569342	1.02653	0.304644	0.624442
TCONS_00004042	4296.06	0.0450614	0.067361	0.668953	0.503525	0.776869
TCONS_00001985	4289.19	0.0186805	0.0577947	0.323222	0.746527	0.906498
TCONS_00010532	4288.72	0.0994603	0.0611588	1.62626	0.103894	0.358543
TCONS_00013904	4285.18	0.0827195	0.0612896	1.34965	0.177129	0.484245
TCONS_00006817	4280.11	0.053604	0.0695045	0.771231	0.44057	0.735092
TCONS_00007204	4279.47	-0.0717582	0.0860564	-0.833851	0.404365	0.707134
TCONS_00006935	4275.55	-0.0155186	0.0625525	-0.248089	0.804066	0.929959
TCONS_00009442	4268.74	0.041558	0.0654818	0.63465	0.525657	0.791164
TCONS_00005228	4266.42	0.043169	0.0831388	0.51924	0.603593	0.832439
TCONS_00009598	4257.57	0.114752	0.061462	1.86704	0.0618966	0.269481
TCONS_00001089	4257.29	-0.145656	0.0629214	-2.31489	0.0206191	0.132759
TCONS_00000505	4252.57	-0.0578761	0.0841148	-0.688061	0.491414	0.769994
TCONS_00012500	4239.47	-0.0879482	0.0610046	-1.44167	0.149397	0.43781
TCONS_00009873	4237.65	0.160188	0.128438	1.2472	0.212323	0.531061
TCONS_00009309	4215.21	-0.124259	0.0599464	-2.07284	0.038187	0.197423
TCONS_00001700	4215.17	-0.0716	0.0620145	-1.15457	0.248267	0.566451
TCONS_00000821	4203.34	-0.223282	0.0766649	-2.91244	0.00358614	0.0387327
TCONS_00008198	4196.96	-0.17216	0.057741	-2.98159	0.00286752	0.032279
TCONS_00003961	4193.46	0.0299889	0.0680514	0.440679	0.659445	0.860404
TCONS_00002339	4179.73	0.101671	0.0673504	1.50959	0.131148	0.40993
TCONS_00008354	4174.22	0.150205	0.0657945	2.28294	0.022434	0.13985
TCONS_00012455	4171.91	-0.0146535	0.0631044	-0.232211	0.816374	0.936211
TCONS_00008889	4168.96	0.101986	0.0641028	1.59098	0.111614	0.374715
TCONS_00012589	4165.09	-0.536608	0.0834967	-6.42669	1.30413e-10	8.52029e-09
TCONS_00000609	4158.55	0.040535	0.0693698	0.584332	0.558997	0.807248
TCONS_00005509	4153.88	-0.119564	0.0617771	-1.93542	0.0529392	0.244143
TCONS_00008030	4148.16	0.151155	0.05944	2.54298	0.0109912	0.0857675
TCONS_00011139	4146.9	0.082159	0.0628964	1.30626	0.191464	0.501738
TCONS_00006287	4143.38	0.12544	0.0618678	2.02755	0.0426066	0.214177
TCONS_00004660	4139.11	0.0170712	0.0586431	0.291104	0.770972	0.917633
TCONS_00001608	4136.88	-0.0421662	0.0583221	-0.722989	0.469687	0.757784
TCONS_00008761	4135.53	0.021971	0.0624481	0.351827	0.724968	0.894664
TCONS_00008995	4126.06	0.077412	0.0643461	1.20306	0.228955	0.546465
TCONS_00007969	4124.72	-0.0744287	0.0644116	-1.15552	0.247879	0.566451
TCONS_00012154	4123.3	-0.0922353	0.0595469	-1.54895	0.121393	0.394039
TCONS_00000327	4122.28	0.0520698	0.0570408	0.912852	0.36132	0.672957
TCONS_00011705	4120.7	0.0909307	0.0604489	1.50426	0.132515	0.411885
TCONS_00008967	4115.4	0.161347	0.0617062	2.61476	0.0089291	0.0741824
TCONS_00001499	4113.76	-0.115683	0.0606282	-1.90807	0.0563815	0.253698
TCONS_00005517	4108.66	0.0359381	0.0720593	0.49873	0.61797	0.838557
TCONS_00000919	4078.9	0.0658853	0.0604084	1.09066	0.275421	0.593597
TCONS_00004457	4076.44	0.144401	0.0644791	2.2395	0.0251232	0.150508
TCONS_00013802	4074.81	-0.0452583	0.0660825	-0.684876	0.493422	0.770492
TCONS_00009107	4071.35	0.119303	0.0704669	1.69304	0.0904483	0.332284
TCONS_00011905	4071.15	-0.277661	0.136718	-2.0309	0.0422647	0.212889
TCONS_00012518	4069	-0.0972702	0.0601182	-1.61798	0.105666	0.363343
TCONS_00000618	4046.02	0.0502503	0.0772638	0.650373	0.515451	0.784776
TCONS_00003120	4041.41	0.247898	0.0754871	3.28399	0.0010235	0.0140342
TCONS_00000392	4034.68	-0.0946479	0.061717	-1.53358	0.125133	0.401486
TCONS_00011122	4033.39	0.0773746	0.0562269	1.37611	0.168786	0.471215
TCONS_00000893	4032.73	0.0244332	0.0625832	0.390412	0.696232	0.882104
TCONS_00009241	4030.96	0.0206389	0.073655	0.28021	0.779316	0.919692
TCONS_00004629	4028.42	-0.0417478	0.08056	-0.518221	0.604304	0.8327
TCONS_00001708	4026.7	0.0534142	0.056669	0.942564	0.345904	0.662983
TCONS_00008602	4015.25	-1.66689	0.0650124	-25.6396	5.51918e-145	7.35597e-142
TCONS_00001231	4004.3	-0.0329297	0.0633101	-0.520134	0.60297	0.832439
TCONS_00007368	3982.99	0.258085	0.0776691	3.32289	0.000890916	0.0124728
TCONS_00000694	3973.09	0.0154738	0.0642866	0.2407	0.809787	0.932186
TCONS_00006046	3963.05	-0.0274758	0.0576491	-0.476604	0.633644	0.847054
TCONS_00008065	3958.66	0.0272566	0.0681629	0.399874	0.689249	0.878905
TCONS_00006160	3947.44	0.0220169	0.0653132	0.337097	0.736043	0.90226
TCONS_00007099	3943.66	0.11725	0.0612861	1.91316	0.0557277	0.251435
TCONS_00007556	3931.54	0.0762903	0.0621656	1.22721	0.219743	0.537975
TCONS_00001285	3925.26	0.191135	0.0636172	3.00446	0.00266056	0.0304116
TCONS_00003245	3920.58	0.0096491	0.0695462	0.138744	0.889653	0.963381
TCONS_00006503	3919.93	-0.0365043	0.0603638	-0.604738	0.545353	0.80162
TCONS_00000943	3912.57	0.0436213	0.0659452	0.661477	0.508306	0.780137
TCONS_00004950	3906.12	0.177861	0.0697258	2.55086	0.0107459	0.0843467
TCONS_00013397	3904.21	-0.0675813	0.0622406	-1.08581	0.277564	0.596733
TCONS_00013805	3903.01	0.000750349	0.0605105	0.0124003	0.990106	0.996282
TCONS_00001130	3894.59	0.206082	0.0677937	3.03984	0.00236701	0.0277707
TCONS_00007363	3887.96	0.149318	0.0772246	1.93355	0.0531683	0.244892
TCONS_00009586	3878.73	0.260272	0.0593892	4.38247	1.17339e-05	0.000320734
TCONS_00011266	3871.82	-0.0942819	0.0597947	-1.57676	0.114851	0.381159
TCONS_00006966	3870.87	-0.301876	0.0728236	-4.1453	3.39362e-05	0.000813492
TCONS_00007639	3869.94	-0.0411741	0.0710405	-0.579586	0.562194	0.809022
TCONS_00010488	3860.29	0.0518221	0.0624338	0.830034	0.40652	0.708618
TCONS_00005241	3858.06	-0.0286996	0.0587369	-0.488613	0.625116	0.84208
TCONS_00013784	3852.08	0.0261319	0.0821522	0.318091	0.750416	0.908701
TCONS_00003749	3849.91	0.136646	0.0837988	1.63064	0.102966	0.357752
TCONS_00007921	3835.62	0.105307	0.0587938	1.79112	0.073274	0.29558
TCONS_00011910	3834.89	-0.0398464	0.134745	-0.295716	0.767447	0.915627
TCONS_00007601	3832.89	-4.1085	0.0750574	-54.7381	0	0
TCONS_00001237	3824.47	0.0172778	0.0654988	0.263788	0.791943	0.924419
TCONS_00004230	3824.18	0.0635463	0.0723382	0.878461	0.379694	0.68904
TCONS_00008768	3819.18	-0.0215181	0.0701615	-0.306694	0.759077	0.912017
TCONS_00005644	3815.75	0.210646	0.0600203	3.50957	0.000448825	0.00727466
TCONS_00013448	3814.47	0.356562	0.0714738	4.98871	6.07853e-07	2.21352e-05
TCONS_00014787	3812.58	0.329412	0.0710565	4.63592	3.55355e-06	0.000112232
TCONS_00011714	3810.56	-0.0652754	0.065453	-0.997288	0.318625	0.636295
TCONS_00008670	3808.77	-0.142035	0.0856243	-1.65882	0.0971521	0.344557
TCONS_00002161	3805.3	0.0917695	0.0792686	1.1577	0.246985	0.56562
TCONS_00003611	3793.02	-0.0456277	0.0706647	-0.645693	0.518478	0.787586
TCONS_00000678	3790.28	0.202793	0.0737187	2.75091	0.00594301	0.0557021
TCONS_00001594	3790.03	0.0902093	0.0611425	1.47539	0.140106	0.425022
TCONS_00000231	3785.96	0.125991	0.0586572	2.14792	0.0317199	0.175521
TCONS_00010921	3784.1	-0.0349962	0.059886	-0.584381	0.558964	0.807248
TCONS_00014187	3783.56	-0.0142748	0.0627872	-0.227353	0.82015	0.936705
TCONS_00006574	3782.59	0.110319	0.0592753	1.86113	0.0627254	0.272468
TCONS_00011106	3780.16	0.165242	0.08851	1.86693	0.061911	0.269481
TCONS_00002551	3778.97	-0.0107785	0.0664609	-0.162178	0.871166	0.954241
TCONS_00006851	3778.64	0.161941	0.0613794	2.63836	0.00833071	0.0704516
TCONS_00009314	3777.58	-0.0865819	0.0661885	-1.30811	0.190836	0.500878
TCONS_00006520	3776.4	0.0660859	0.0634376	1.04175	0.297529	0.618342
TCONS_00002984	3776.17	0.339528	0.0685369	4.95395	7.27226e-07	2.6055e-05
TCONS_00005365	3774.68	0.212258	0.0673734	3.15046	0.00163012	0.0208106
TCONS_00000856	3769.79	0.0323591	0.0587787	0.550524	0.58196	0.81836
TCONS_00005628	3767.7	0.0788937	0.0671355	1.17514	0.239938	0.557901
TCONS_00006386	3765.58	0.121902	0.0619855	1.96662	0.049227	0.234656
TCONS_00003309	3747.17	-0.212797	0.0606749	-3.50716	0.000452916	0.00730806
TCONS_00004720	3742.32	0.0562811	0.0711616	0.790892	0.429007	0.727087
TCONS_00007042	3740.68	0.0115408	0.0610094	0.189164	0.849964	0.949352
TCONS_00008410	3737.13	0.287878	0.0823594	3.49538	0.000473383	0.00752893
TCONS_00006008	3732.23	0.0511131	0.0784953	0.651161	0.514943	0.784765
TCONS_00010815	3731.25	-0.0129675	0.0715788	-0.181165	0.856238	0.950178
TCONS_00009709	3731.09	0.0878716	0.0582235	1.50921	0.131245	0.410039
TCONS_00010182	3727.4	0.00647027	0.0703968	0.0919115	0.926768	0.974135
TCONS_00010453	3726.95	0.0289842	0.0585814	0.494768	0.620764	0.839508
TCONS_00013967	3725.12	-0.12234	0.0815158	-1.50081	0.133405	0.413448
TCONS_00011616	3722.76	0.0504477	0.0704288	0.716293	0.47381	0.760623
TCONS_00003265	3710.53	0.0325751	0.0654935	0.49738	0.618921	0.8388
TCONS_00008621	3702.86	0.0494668	0.0711423	0.695322	0.486854	0.768249
TCONS_00011120	3702.38	-0.00567502	0.0648438	-0.0875184	0.930259	0.976002
TCONS_00008214	3701.25	0.160978	0.0736028	2.18712	0.0287338	0.16394
TCONS_00011463	3701.13	-0.167465	0.0670207	-2.49871	0.0124646	0.0937766
TCONS_00014303	3700.5	0.0833081	0.080024	1.04104	0.297857	0.618342
TCONS_00000246	3694.53	-0.133166	0.0709701	-1.87637	0.0606049	0.26623
TCONS_00011256	3687.96	0.165904	0.0608129	2.72811	0.00636983	0.0583886
TCONS_00004007	3687.02	0.0476582	0.0802463	0.593899	0.55258	0.803127
TCONS_00006727	3685.33	-0.0219847	0.0628802	-0.349629	0.726617	0.895704
TCONS_00004489	3684.94	0.0413517	0.0583998	0.708079	0.478896	0.763484
TCONS_00003699	3684.3	0.0861382	0.0603907	1.42635	0.153768	0.44402
TCONS_00008409	3681.53	0.0259452	0.0660997	0.392517	0.694676	0.881835
TCONS_00000839	3678.12	0.184939	0.0645803	2.86371	0.00418712	0.0429938
TCONS_00003219	3672.67	-0.198177	0.0687568	-2.88229	0.00394797	0.0414973
TCONS_00011029	3672.43	-0.320702	0.0760958	-4.21445	2.5039e-05	0.000622611
TCONS_00007051	3668.79	0.124648	0.0645671	1.93052	0.0535429	0.245399
TCONS_00007656	3662.03	0.0217449	0.0665491	0.326749	0.743857	0.905182
TCONS_00012187	3661.69	-0.0319367	0.065847	-0.485014	0.627666	0.843235
TCONS_00012863	3656.5	0.053705	0.0610081	0.880293	0.3787	0.688255
TCONS_00012935	3630.42	-0.0713356	0.0702301	-1.01574	0.309753	0.629711
TCONS_00000917	3627.19	-0.107855	0.0661964	-1.62932	0.103244	0.358004
TCONS_00007895	3625.64	-0.107517	0.0729352	-1.47415	0.140441	0.425022
TCONS_00008116	3623.5	-0.0413474	0.0593459	-0.696719	0.485979	0.768249
TCONS_00006350	3623.34	-0.0184671	0.0593533	-0.311139	0.755695	0.910989
TCONS_00003384	3620.85	0.0956094	0.0820636	1.16506	0.243993	0.562424
TCONS_00007079	3587.74	0.0982354	0.0629777	1.55985	0.118796	0.389543
TCONS_00000912	3587.66	0.0523076	0.0628071	0.832829	0.404941	0.707725
TCONS_00000225	3582.79	0.0803268	0.0682526	1.1769	0.239234	0.557292
TCONS_00011394	3582.09	-0.0769745	0.0798541	-0.963939	0.335077	0.651576
TCONS_00005905	3579.73	-0.00570454	0.0772839	-0.0738128	0.941159	0.979086
TCONS_00004637	3576.91	-0.154249	0.059152	-2.60767	0.00911603	0.074999
TCONS_00002775	3575.02	-0.0703789	0.0622831	-1.12998	0.258483	0.577218
TCONS_00006009	3573.69	0.0993633	0.0656948	1.5125	0.130407	0.409023
TCONS_00009122	3569.13	-0.0046156	0.0603149	-0.0765252	0.939001	0.978806
TCONS_00008445	3561.26	0.117906	0.0610739	1.93055	0.0535384	0.245399
TCONS_00010953	3557.54	-0.210451	0.0611619	-3.44088	0.000579823	0.00883119
TCONS_00002785	3555.78	-0.0557624	0.0619103	-0.900696	0.36775	0.678028
TCONS_00004446	3555.56	-0.0433979	0.0769198	-0.564196	0.572621	0.814349
TCONS_00013840	3552.34	-0.146201	0.0758543	-1.92739	0.0539306	0.24616
TCONS_00012765	3549.67	0.00348231	0.0661214	0.0526653	0.957999	0.984138
TCONS_00007381	3542.22	0.159476	0.0644326	2.47508	0.0133206	0.0978704
TCONS_00000268	3541.7	-0.0371887	0.0605294	-0.614392	0.538957	0.799295
TCONS_00006012	3540.06	0.0418296	0.0600485	0.696596	0.486055	0.768249
TCONS_00005114	3532.95	-0.0102355	0.0791568	-0.129306	0.897115	0.96597
TCONS_00003293	3531.46	-0.185561	0.0895921	-2.07118	0.038342	0.198071
TCONS_00004951	3531.34	0.081477	0.0679902	1.19836	0.230775	0.548778
TCONS_00007231	3527.98	0.122342	0.0618137	1.9792	0.0477935	0.231438
TCONS_00011015	3526.99	0.292448	0.0608058	4.80955	1.51274e-06	5.11721e-05
TCONS_00008782	3526.06	-0.0119843	0.0734501	-0.163163	0.87039	0.954241
TCONS_00005594	3523.39	-0.108464	0.138567	-0.782757	0.43377	0.729893
TCONS_00008793	3521.88	-0.00671909	0.0599715	-0.112038	0.910793	0.971435
TCONS_00009316	3512.23	-0.124774	0.0624489	-1.99801	0.0457153	0.224666
TCONS_00007920	3507.15	-0.188065	0.0625013	-3.00897	0.00262135	0.0300666
TCONS_00005512	3506.11	0.14099	0.0655402	2.15121	0.03146	0.174708
TCONS_00008272	3484.27	-0.0905291	0.064415	-1.4054	0.159901	0.4546
TCONS_00003848	3478.99	0.0571744	0.0603608	0.947212	0.343531	0.66069
TCONS_00005870	3476.01	-0.118203	0.0679185	-1.74036	0.0817956	0.312729
TCONS_00010096	3462.74	-0.131479	0.0667366	-1.97012	0.0488248	0.23387
TCONS_00000087	3461.56	-0.0186912	0.0659141	-0.283569	0.776741	0.91956
TCONS_00005383	3460.77	0.171009	0.0949862	1.80035	0.0718051	0.291952
TCONS_00003098	3457.57	0.0853927	0.0684419	1.24767	0.212153	0.530901
TCONS_00008873	3454.43	0.0699174	0.0825166	0.847313	0.396821	0.70149
TCONS_00007084	3449.13	0.0561523	0.0608905	0.922185	0.356432	0.670149
TCONS_00009300	3446.69	0.113866	0.0624264	1.82401	0.0681511	0.284726
TCONS_00006105	3438.44	-0.0681541	0.0588637	-1.15783	0.246934	0.56562
TCONS_00008248	3437.27	0.0182546	0.0747265	0.244286	0.807009	0.931693
TCONS_00014791	3432.58	0.0110778	0.0596522	0.185706	0.852675	0.949352
TCONS_00007374	3427.54	-0.283961	0.064847	-4.37894	1.19259e-05	0.000324385
TCONS_00006777	3423.14	-0.0890824	0.0593714	-1.50043	0.133504	0.413448
TCONS_00001931	3420.81	0.0548562	0.0702871	0.780459	0.435121	0.731126
TCONS_00000328	3411.66	0.0526054	0.0589315	0.892653	0.372043	0.681687
TCONS_00012021	3411.58	-0.288117	0.0646585	-4.45598	8.35125e-06	0.000243147
TCONS_00004796	3410.03	0.0714404	0.0827694	0.863125	0.388069	0.695545
TCONS_00006671	3408.84	0.177839	0.0680054	2.61507	0.00892086	0.0741824
TCONS_00011675	3407.96	-0.140975	0.0722008	-1.95255	0.0508735	0.239898
TCONS_00013115	3403.26	0.147683	0.0759186	1.94528	0.0517408	0.241506
TCONS_00000964	3393.54	0.0304195	0.0628289	0.484165	0.628269	0.843236
TCONS_00003990	3377.95	-0.0503251	0.0617387	-0.815131	0.414997	0.716276
TCONS_00001433	3375.89	-0.00550187	0.0622588	-0.088371	0.929582	0.975586
TCONS_00009059	3374.49	-0.0171519	0.077925	-0.220108	0.825787	0.939718
TCONS_00003845	3365.53	0.0350353	0.0649028	0.539811	0.589327	0.822052
TCONS_00010065	3358.68	-0.0250027	0.0672334	-0.371879	0.709983	0.888178
TCONS_00011013	3354.46	0.0966363	0.0624932	1.54635	0.12202	0.395305
TCONS_00006708	3351.86	0.0200511	0.059961	0.334402	0.738076	0.902529
TCONS_00011441	3350.74	0.0882936	0.065934	1.33912	0.180532	0.487465
TCONS_00008991	3336.93	-0.00163957	0.0620222	-0.0264352	0.97891	0.991859
TCONS_00010509	3335.25	0.0642455	0.0677429	0.948371	0.342941	0.660317
TCONS_00006428	3323.08	-0.0303586	0.0723071	-0.419857	0.67459	0.86953
TCONS_00013139	3320.46	0.0479027	0.0731346	0.654994	0.512471	0.784079
TCONS_00005315	3316.03	0.0665898	0.0600032	1.10977	0.267098	0.584784
TCONS_00008376	3307.64	0.177718	0.0755765	2.35151	0.0186976	0.12409
TCONS_00006117	3301.89	0.0228785	0.0648743	0.352658	0.724344	0.89406
TCONS_00001134	3301.36	0.0206952	0.0736408	0.281029	0.778688	0.919664
TCONS_00011680	3295.13	-0.0219548	0.0766309	-0.286501	0.774494	0.918662
TCONS_00012505	3292.88	0.342157	0.0677438	5.05074	4.40098e-07	1.65696e-05
TCONS_00009501	3289.18	-0.158707	0.0660316	-2.40351	0.0162387	0.112024
TCONS_00005841	3284.75	-0.144386	0.0679847	-2.12381	0.0336863	0.182999
TCONS_00013242	3280.05	-0.00396186	0.0681287	-0.0581527	0.953627	0.981918
TCONS_00004617	3273.67	0.192604	0.0689045	2.79523	0.00518635	0.0507516
TCONS_00000950	3271.01	-0.0260335	0.0590221	-0.441081	0.659155	0.860404
TCONS_00008350	3270.04	-0.141731	0.0727085	-1.9493	0.0512591	0.240726
TCONS_00004305	3259.93	-0.00124244	0.0610717	-0.020344	0.983769	0.993911
TCONS_00005871	3243.34	0.0270395	0.0636782	0.424627	0.671109	0.868063
TCONS_00012631	3240.75	0.129303	0.0670742	1.92775	0.0538859	0.246124
TCONS_00012822	3228.99	0.00218552	0.0667887	0.032723	0.973896	0.990726
TCONS_00008033	3228.12	-0.443164	0.0652504	-6.79174	1.10786e-11	8.38952e-10
TCONS_00010503	3226.43	0.00865771	0.0670511	0.129121	0.897262	0.96597
TCONS_00005384	3221.53	-0.0193638	0.0597267	-0.324207	0.745781	0.906252
TCONS_00001483	3219.42	0.10309	0.0674493	1.52841	0.126411	0.403112
TCONS_00002274	3208.65	0.000450231	0.0784533	0.00573884	0.995421	0.998418
TCONS_00000111	3206.85	0.236147	0.0660653	3.57445	0.000350967	0.00596644
TCONS_00008435	3203.52	-0.110601	0.0771972	-1.43271	0.15194	0.441574
TCONS_00005727	3197.39	-0.191673	0.0642557	-2.98297	0.00285464	0.0321883
TCONS_00002703	3193.46	-0.0897523	0.0735287	-1.22064	0.222221	0.54059
TCONS_00001408	3193.25	0.110404	0.0612535	1.80241	0.0714802	0.291164
TCONS_00008576	3184.51	0.090276	0.0672255	1.34288	0.179309	0.486088
TCONS_00008484	3183.89	-0.228312	0.06783	-3.36594	0.000762831	0.0109323
TCONS_00013553	3178.6	-0.262354	0.0753367	-3.48241	0.000496918	0.00781005
TCONS_00005907	3171.97	0.136065	0.0664566	2.04742	0.0406164	0.206345
TCONS_00009835	3170.55	-0.0242995	0.0602758	-0.403139	0.686846	0.877567
TCONS_00001274	3169.31	-0.038877	0.0691504	-0.562209	0.573973	0.814529
TCONS_00001310	3168.8	0.105534	0.065655	1.60741	0.107965	0.367457
TCONS_00005016	3150.18	0.190191	0.0656356	2.89768	0.00375929	0.0398916
TCONS_00003343	3142.57	0.105766	0.0916362	1.1542	0.248419	0.566552
TCONS_00010256	3141.78	-0.0417764	0.0618631	-0.675304	0.499483	0.774116
TCONS_00004231	3140.57	0.137813	0.0615569	2.2388	0.0251692	0.150508
TCONS_00009891	3134.52	0.0776081	0.0628536	1.23474	0.216926	0.534631
TCONS_00002829	3124.14	0.235596	0.0652387	3.61129	0.000304673	0.00524722
TCONS_00000376	3122.03	-0.00791813	0.0837649	-0.0945281	0.92469	0.974135
TCONS_00011635	3114.54	-0.0987637	0.0681332	-1.44957	0.147179	0.434559
TCONS_00002301	3110.22	0.038087	0.0611209	0.623142	0.533191	0.794186
TCONS_00004022	3109.18	-0.0663925	0.0625769	-1.06097	0.288702	0.609797
TCONS_00002216	3104.73	0.0254876	0.0604967	0.421306	0.673532	0.869072
TCONS_00000822	3102.46	-0.000662961	0.0741909	-0.00893587	0.99287	0.99706
TCONS_00001311	3096.6	-0.218298	0.0688067	-3.17262	0.0015107	0.0196244
TCONS_00001374	3093.22	0.0613011	0.0604061	1.01482	0.310194	0.630415
TCONS_00006013	3090.62	0.113924	0.0627817	1.81461	0.0695845	0.287119
TCONS_00008112	3088.79	-0.00241058	0.0761349	-0.0316619	0.974742	0.990799
TCONS_00000623	3077.95	0.00220601	0.0682731	0.0323115	0.974224	0.990726
TCONS_00000818	3074.52	0.104639	0.0619394	1.68937	0.091148	0.3334
TCONS_00000156	3070.28	0.274637	0.0680015	4.03869	5.37496e-05	0.00120602
TCONS_00003714	3063.67	0.103263	0.0592458	1.74295	0.0813419	0.312205
TCONS_00014748	3062.78	-0.00550747	0.0917623	-0.0600189	0.952141	0.981314
TCONS_00000825	3054.96	0.132414	0.0776522	1.70521	0.0881546	0.327095
TCONS_00000914	3054.75	-0.0915102	0.068924	-1.3277	0.184278	0.492
TCONS_00002030	3053.23	0.104421	0.0766258	1.36274	0.172964	0.478072
TCONS_00003483	3051.55	0.315136	0.0707534	4.454	8.42842e-06	0.000243147
TCONS_00003594	3049.5	0.11613	0.0652487	1.7798	0.0751086	0.299177
TCONS_00008573	3045.62	0.0832056	0.065366	1.27292	0.203046	0.518628
TCONS_00002166	3038.76	0.234773	0.0760494	3.08711	0.00202112	0.0244886
TCONS_00011008	3036.14	0.0376947	0.0626106	0.60205	0.547141	0.801625
TCONS_00003585	3033.2	-0.0869792	0.0702754	-1.23769	0.215831	0.533494
TCONS_00007138	3022.76	0.107623	0.062152	1.7316	0.0833445	0.315932
TCONS_00013659	3022.16	0.010217	0.140017	0.0729699	0.94183	0.979086
TCONS_00006793	3019.08	-0.0119341	0.0628652	-0.189836	0.849438	0.949352
TCONS_00007524	3017.91	-0.0313608	0.0612775	-0.511783	0.608803	0.834225
TCONS_00006318	3012.82	0.214115	0.0660623	3.24111	0.00119065	0.0159327
TCONS_00003485	3012.04	0.091513	0.067831	1.34913	0.177294	0.484365
TCONS_00005874	3002.98	0.112433	0.0696773	1.61363	0.106608	0.364513
TCONS_00011491	3002.3	0.0542262	0.06997	0.774992	0.438344	0.732719
TCONS_00014221	3001.46	0.283696	0.0645679	4.39376	1.11408e-05	0.000308059
TCONS_00012674	3001.22	0.0393917	0.0720739	0.546546	0.584691	0.819255
TCONS_00002999	2995.24	0.109255	0.0701032	1.55849	0.119117	0.390072
TCONS_00003574	2993.78	0.0883617	0.0794861	1.11166	0.266284	0.584298
TCONS_00003827	2984.91	0.0152389	0.0628026	0.242648	0.808278	0.931736
TCONS_00008230	2976.43	-0.0105301	0.065003	-0.161994	0.87131	0.954241
TCONS_00008732	2970.17	0.0163566	0.0766306	0.213448	0.830978	0.941295
TCONS_00013534	2968.7	0.114905	0.0731091	1.57169	0.116021	0.383795
TCONS_00002924	2968.64	0.0217882	0.0759249	0.28697	0.774135	0.918662
TCONS_00014804	2968.62	-0.0853461	0.0778608	-1.09614	0.273019	0.589756
TCONS_00000351	2966.39	0.364882	0.0662992	5.50356	3.72191e-08	1.69882e-06
TCONS_00001701	2959.23	-0.130069	0.0652201	-1.99431	0.0461183	0.225742
TCONS_00014745	2955.16	-0.00309392	0.0614356	-0.0503604	0.959835	0.985417
TCONS_00004656	2944.98	0.0232204	0.0647776	0.358463	0.719997	0.891022
TCONS_00002709	2943.79	0.0849124	0.0684698	1.24014	0.214922	0.533119
TCONS_00000394	2942.86	-0.158497	0.0758099	-2.09072	0.0365535	0.192411
TCONS_00001407	2941.75	0.0389793	0.0704713	0.553124	0.580179	0.817986
TCONS_00006317	2936.82	0.145288	0.0736654	1.97227	0.0485784	0.233557
TCONS_00001589	2934.14	0.184903	0.0686733	2.6925	0.00709175	0.062845
TCONS_00008358	2929.38	0.0818802	0.0704519	1.16222	0.245148	0.56399
TCONS_00009706	2928.03	-0.129122	0.0735864	-1.7547	0.0793111	0.30872
TCONS_00000018	2927.84	-0.0379157	0.068873	-0.550516	0.581966	0.81836
TCONS_00010478	2926.75	-1.4748	0.0725469	-20.329	7.12784e-92	5.93749e-89
TCONS_00000064	2925.13	0.165492	0.0603618	2.74167	0.00611284	0.0566565
TCONS_00010923	2913.55	0.039922	0.0837504	0.476678	0.633591	0.847054
TCONS_00001920	2909.65	-0.0226286	0.0620875	-0.364462	0.715513	0.889498
TCONS_00002454	2905.51	-0.0151536	0.0806107	-0.187985	0.850888	0.949352
TCONS_00011884	2899.01	-0.0523397	0.0648812	-0.8067	0.419839	0.720795
TCONS_00005006	2890.82	0.463567	0.0836471	5.54194	2.99141e-08	1.42391e-06
TCONS_00008932	2890.69	0.17257	0.0780282	2.21163	0.0269922	0.15655
TCONS_00012457	2887.77	-0.0638284	0.0935015	-0.682646	0.494831	0.77121
TCONS_00002734	2884.12	0.0702263	0.0659457	1.06491	0.286916	0.607373
TCONS_00008491	2879.06	0.139898	0.0619475	2.25834	0.0239245	0.146538
TCONS_00002181	2873.07	0.085336	0.0700597	1.21805	0.223206	0.541276
TCONS_00011907	2869.06	0.296858	0.0751526	3.95007	7.81276e-05	0.0016581
TCONS_00000570	2868.72	0.00979872	0.0705509	0.138889	0.889538	0.963381
TCONS_00006646	2863.48	-0.160793	0.069888	-2.30072	0.0214074	0.136255
TCONS_00014118	2861.49	0.0469229	0.0620915	0.755706	0.449825	0.742541
TCONS_00009221	2858.96	-0.0595119	0.0749997	-0.793496	0.427489	0.725251
TCONS_00004082	2857.92	-0.261089	0.0646396	-4.03915	5.36447e-05	0.00120602
TCONS_00004562	2856.44	-0.0314447	0.064259	-0.489344	0.624598	0.841711
TCONS_00009462	2853.9	-0.107315	0.0690024	-1.55524	0.119889	0.391445
TCONS_00010689	2851.89	-0.0681065	0.0680978	-1.00013	0.317248	0.634903
TCONS_00011610	2851	-0.193116	0.0698943	-2.76297	0.00572775	0.0542955
TCONS_00014591	2840.96	0.255563	0.0700288	3.64939	0.000262862	0.0047216
TCONS_00012613	2835.68	-0.41001	0.0728282	-5.62983	1.8039e-08	8.93782e-07
TCONS_00000071	2833.96	0.0398061	0.0687032	0.579393	0.562324	0.809022
TCONS_00003127	2832.53	0.0466509	0.0641276	0.72747	0.466938	0.755554
TCONS_00011009	2830.48	-0.0288894	0.0755258	-0.382511	0.702082	0.884737
TCONS_00005605	2826.87	0.106862	0.0632639	1.68915	0.091191	0.3334
TCONS_00001740	2825.94	-0.153414	0.131467	-1.16694	0.243235	0.561779
TCONS_00014085	2825.14	-0.24238	0.0800187	-3.02904	0.00245335	0.0285824
TCONS_00006152	2807.41	-0.0383422	0.060843	-0.630183	0.528575	0.792002
TCONS_00010898	2803.14	-0.0191293	0.0624111	-0.306505	0.75922	0.912017
TCONS_00012780	2800.49	0.104779	0.0875569	1.1967	0.231424	0.548778
TCONS_00008635	2799.77	-0.136159	0.0775589	-1.75556	0.0791632	0.308505
TCONS_00007426	2797.33	-0.139355	0.0683415	-2.03909	0.0414406	0.209371
TCONS_00006225	2795.47	0.159853	0.0645275	2.47728	0.0132388	0.0975925
TCONS_00003018	2792.65	0.0551706	0.063734	0.865638	0.386689	0.694743
TCONS_00009308	2788.02	0.208514	0.0662729	3.1463	0.00165352	0.0210051
TCONS_00003672	2781.44	0.167423	0.0659694	2.53789	0.0111524	0.0864185
TCONS_00010801	2780.02	-0.0639089	0.0660523	-0.967549	0.333269	0.649765
TCONS_00000652	2778	-0.302438	0.0706554	-4.28047	1.86501e-05	0.000483597
TCONS_00003722	2776.53	-0.0380367	0.0632268	-0.601592	0.547446	0.801625
TCONS_00005306	2771.43	0.232907	0.0948875	2.45456	0.0141057	0.101999
TCONS_00010966	2768.02	0.0712928	0.0758979	0.939326	0.347564	0.663957
TCONS_00008530	2765.25	0.242976	0.0777926	3.12338	0.00178789	0.0223957
TCONS_00002515	2760.91	0.292004	0.0667781	4.37276	1.22688e-05	0.000331008
TCONS_00001978	2757.59	0.0593039	0.0675605	0.877789	0.380058	0.68936
TCONS_00005809	2752.85	0.0403138	0.0657358	0.61327	0.539698	0.799295
TCONS_00011073	2751.79	0.00600751	0.0736639	0.081553	0.935002	0.977389
TCONS_00007307	2746.1	0.214519	0.063279	3.39005	0.00069879	0.0101898
TCONS_00014105	2743.61	-0.276782	0.0754434	-3.66874	0.000243747	0.0044871
TCONS_00011040	2742.93	0.0462273	0.0798868	0.57866	0.562819	0.809022
TCONS_00010484	2742.69	-1.60369	0.0747014	-21.468	3.10273e-102	2.9538e-99
TCONS_00003111	2742.39	0.0394408	0.0839698	0.469702	0.638568	0.850137
TCONS_00013547	2735.74	0.119618	0.073429	1.62903	0.103308	0.358004
TCONS_00006887	2734.86	0.0237247	0.0717994	0.33043	0.741075	0.903995
TCONS_00009926	2728.99	0.105642	0.0674155	1.56703	0.117108	0.386148
TCONS_00004081	2726.93	0.091445	0.0747099	1.224	0.220952	0.539539
TCONS_00013026	2725.26	0.0469292	0.0744991	0.629931	0.52874	0.792002
TCONS_00003289	2723.67	-0.0158697	0.0849849	-0.186736	0.851868	0.949352
TCONS_00011550	2722.61	-0.0103648	0.0685058	-0.151299	0.87974	0.958199
TCONS_00007007	2712.14	-0.208805	0.0660199	-3.16277	0.00156278	0.0201438
TCONS_00003008	2710.03	0.0938532	0.0668105	1.40477	0.160091	0.45475
TCONS_00005895	2703.54	0.238604	0.06687	3.56817	0.000359482	0.00607871
TCONS_00003754	2702.27	-0.0238058	0.0699478	-0.340337	0.733603	0.90098
TCONS_00013171	2697.29	-0.303765	0.0730014	-4.16108	3.16741e-05	0.000762007
TCONS_00012165	2695.48	0.00664369	0.0625319	0.106245	0.915388	0.973189
TCONS_00013783	2695.02	-0.0394544	0.0655619	-0.601789	0.547315	0.801625
TCONS_00011541	2691.69	-0.166534	0.0894926	-1.86087	0.0627622	0.272468
TCONS_00008826	2686.8	0.149075	0.0691914	2.15452	0.0311992	0.173814
TCONS_00006436	2684.24	0.0778922	0.0724146	1.07564	0.282088	0.602233
TCONS_00014393	2679.76	0.0202347	0.0771445	0.262296	0.793094	0.924742
TCONS_00007905	2673.12	-0.167456	0.0694614	-2.41078	0.0159186	0.110272
TCONS_00009465	2672.15	-0.192509	0.0815196	-2.36151	0.0182007	0.121899
TCONS_00010153	2661.68	-0.0328456	0.0633869	-0.518177	0.604335	0.8327
TCONS_00000474	2658.14	0.183897	0.067977	2.70529	0.00682454	0.0609634
TCONS_00001114	2655.39	-0.0508554	0.0632293	-0.804302	0.421222	0.721486
TCONS_00011665	2645.54	0.0896458	0.0706959	1.26805	0.204781	0.520862
TCONS_00006685	2642.79	-0.0422484	0.0673852	-0.626968	0.53068	0.792394
TCONS_00002626	2640	0.0579827	0.0676099	0.857606	0.39111	0.698395
TCONS_00010888	2638.7	0.107579	0.0694761	1.54843	0.121519	0.394255
TCONS_00002573	2637.34	0.10518	0.0637652	1.64949	0.0990474	0.349049
TCONS_00009708	2635.96	-0.110423	0.0744518	-1.48315	0.138036	0.421571
TCONS_00009769	2635.31	0.151923	0.0779052	1.9501	0.0511636	0.240617
TCONS_00000892	2614.58	0.250192	0.0646647	3.86907	0.000109249	0.0021863
TCONS_00001211	2610.84	0.0512663	0.0692069	0.740769	0.458834	0.750532
TCONS_00013285	2610.08	0.11079	0.0652786	1.69719	0.0896605	0.330921
TCONS_00009795	2605.09	0.0948391	0.0660977	1.43483	0.151335	0.440777
TCONS_00009874	2604.79	0.193437	0.0628116	3.07964	0.00207253	0.0250206
TCONS_00005458	2599.47	0.0427272	0.0654523	0.652799	0.513886	0.784544
TCONS_00001927	2596.62	0.10135	0.0663614	1.52724	0.126702	0.403468
TCONS_00000795	2592.8	-0.0133231	0.069574	-0.191496	0.848137	0.948957
TCONS_00014222	2587.4	0.129928	0.080587	1.61227	0.106902	0.364988
TCONS_00014715	2585.59	0.341437	0.064621	5.28369	1.26607e-07	5.33992e-06
TCONS_00006536	2584.04	0.327127	0.0663401	4.93106	8.17846e-07	2.8729e-05
TCONS_00004023	2582.5	0.0590872	0.0654429	0.902882	0.366589	0.677467
TCONS_00013380	2571.06	-0.281096	0.0662981	-4.23989	2.23632e-05	0.000564501
TCONS_00005373	2569.18	0.127643	0.0728222	1.75281	0.0796355	0.308936
TCONS_00002983	2568.09	-0.351847	0.0685731	-5.13097	2.88249e-07	1.10948e-05
TCONS_00001564	2563.92	0.0541673	0.0639301	0.847289	0.396834	0.70149
TCONS_00003387	2562.3	0.0805605	0.0669667	1.20299	0.228979	0.546465
TCONS_00006019	2561.33	0.188989	0.132686	1.42433	0.154351	0.444511
TCONS_00011048	2560.74	0.147265	0.0702617	2.09595	0.0360863	0.190554
TCONS_00012477	2552.83	-0.0244744	0.0725409	-0.337388	0.735825	0.902215
TCONS_00011603	2549.9	-0.0051265	0.0639012	-0.0802255	0.936058	0.977879
TCONS_00005105	2544.79	-0.0627246	0.0633812	-0.98964	0.32235	0.641153
TCONS_00002268	2540.06	0.0521719	0.0683756	0.76302	0.445451	0.739334
TCONS_00002405	2535.02	-0.0286125	0.0658962	-0.434205	0.66414	0.863239
TCONS_00009253	2534.32	0.0933828	0.082088	1.13759	0.25529	0.572599
TCONS_00008481	2533.01	-0.216366	0.0695974	-3.10883	0.00187833	0.0231371
TCONS_00007828	2529.07	0.0962903	0.0700549	1.3745	0.169287	0.47175
TCONS_00012787	2526.55	-0.0816619	0.0689396	-1.18454	0.236198	0.554625
TCONS_00006176	2517.86	0.200325	0.0729969	2.74429	0.00606423	0.0563627
TCONS_00013254	2517.69	0.0665887	0.0786418	0.846734	0.397143	0.70149
TCONS_00005560	2516.99	0.161096	0.0644742	2.49862	0.0124679	0.0937766
TCONS_00007630	2509.21	0.137825	0.0728146	1.89282	0.0583824	0.259893
TCONS_00001140	2506.2	-0.0232509	0.0645269	-0.360328	0.718602	0.890436
TCONS_00004109	2504.42	-0.47676	0.0715614	-6.66225	2.69672e-11	1.9118e-09
TCONS_00008729	2502.57	0.211366	0.0707339	2.98818	0.00280645	0.0317529
TCONS_00010047	2500.55	0.0863966	0.0708912	1.21872	0.22295	0.541276
TCONS_00007661	2499.38	-0.147793	0.0785453	-1.88162	0.0598872	0.264647
TCONS_00010492	2495.01	0.11292	0.0708314	1.59421	0.110889	0.373593
TCONS_00012367	2492.88	0.00336976	0.0928025	0.0363111	0.971034	0.990628
TCONS_00011532	2492.17	0.00529575	0.0763957	0.06932	0.944735	0.979295
TCONS_00009640	2492.08	-0.222404	0.068038	-3.26883	0.00107995	0.0146826
TCONS_00008341	2487.68	-0.0614075	0.0780807	-0.786462	0.431597	0.728696
TCONS_00000801	2486.19	-0.110541	0.0685304	-1.61303	0.106739	0.364774
TCONS_00000796	2484.96	0.0777938	0.0628541	1.23769	0.215831	0.533494
TCONS_00001760	2483.83	-0.157314	0.133722	-1.17643	0.239425	0.557292
TCONS_00007091	2482	-0.226679	0.0714943	-3.17059	0.0015213	0.0197237
TCONS_00010594	2480.45	0.106916	0.0652102	1.63955	0.101098	0.353657
TCONS_00002870	2479.12	-0.101014	0.0695541	-1.45231	0.146414	0.434226
TCONS_00008746	2477.94	-0.0306939	0.0729393	-0.420815	0.67389	0.869072
TCONS_00009846	2477.26	-0.0469694	0.0674996	-0.695848	0.486524	0.768249
TCONS_00005981	2475.86	0.136784	0.0911807	1.50015	0.133577	0.413448
TCONS_00002868	2472.11	0.00768156	0.0627593	0.122397	0.902584	0.968415
TCONS_00014123	2469.3	-0.488712	0.0720449	-6.78344	1.17344e-11	8.78629e-10
TCONS_00008477	2467.9	0.0167753	0.0726594	0.230875	0.817412	0.936229
TCONS_00000670	2465.59	0.019253	0.069117	0.278556	0.780585	0.919951
TCONS_00004771	2458.64	0.100562	0.0835831	1.20314	0.228921	0.546465
TCONS_00001654	2457.58	0.0241708	0.0672337	0.359504	0.719218	0.890703
TCONS_00007102	2451.97	-0.0509914	0.068987	-0.739145	0.459819	0.7513
TCONS_00007627	2449.6	-0.0157651	0.073104	-0.215653	0.829258	0.941053
TCONS_00009428	2442.41	0.218182	0.0900282	2.42348	0.0153724	0.107494
TCONS_00009130	2442.33	-0.0696656	0.0662927	-1.05088	0.293314	0.615055
TCONS_00002043	2439.83	0.174818	0.0672024	2.60137	0.00928533	0.0762037
TCONS_00002218	2434.79	-0.433437	0.067128	-6.45688	1.06882e-10	7.19456e-09
TCONS_00000380	2434.62	0.141502	0.08828	1.60287	0.108963	0.36953
TCONS_00003026	2431.79	-0.0156705	0.0814553	-0.192382	0.847443	0.948782
TCONS_00002717	2428.7	0.0516946	0.0759886	0.680294	0.496318	0.772051
TCONS_00009373	2427.05	0.0503246	0.0684528	0.735172	0.462235	0.752701
TCONS_00001356	2425.49	0.0941339	0.0650666	1.44673	0.147972	0.435551
TCONS_00005630	2423.49	0.238965	0.0681596	3.50596	0.000454955	0.00732324
TCONS_00000040	2420.6	0.1483	0.0788332	1.88119	0.0599456	0.26473
TCONS_00014868	2420.57	0.155102	0.074045	2.09469	0.0361982	0.190842
TCONS_00012176	2411.66	-0.125713	0.0651365	-1.92999	0.0536081	0.245529
TCONS_00000593	2411.09	-0.0130285	0.0667079	-0.195306	0.845153	0.947208
TCONS_00005482	2410.93	0.10336	0.0720798	1.43396	0.151583	0.441101
TCONS_00011372	2410.27	-0.0146062	0.0688288	-0.21221	0.831943	0.941908
TCONS_00004267	2410.16	0.0250452	0.0748129	0.334772	0.737797	0.902529
TCONS_00006674	2409.61	0.30234	0.0719548	4.20181	2.64793e-05	0.000648744
TCONS_00003448	2407.38	0.0414007	0.0687434	0.602251	0.547007	0.801625
TCONS_00007003	2406.58	-0.169605	0.0685821	-2.47302	0.0133977	0.0982205
TCONS_00011373	2404.8	-0.0273673	0.0702139	-0.38977	0.696707	0.88228
TCONS_00009585	2403.61	-0.183624	0.0650344	-2.82349	0.00475042	0.0473588
TCONS_00003476	2402.06	0.0326568	0.0692096	0.471854	0.637031	0.848858
TCONS_00008349	2395.6	-0.0492814	0.0753117	-0.654365	0.512876	0.784261
TCONS_00004192	2394.35	-0.0172062	0.0708368	-0.242899	0.808084	0.931707
TCONS_00010899	2393.29	0.113897	0.0890273	1.27935	0.200773	0.514597
TCONS_00010421	2388.94	-0.00385456	0.0684412	-0.0563193	0.955087	0.982561
TCONS_00000899	2376.07	-0.372064	0.0792305	-4.69597	2.65347e-06	8.58386e-05
TCONS_00008365	2366.34	-0.239255	0.0644104	-3.71454	0.00020357	0.00382138
TCONS_00001833	2365.82	0.143535	0.0708961	2.02459	0.0429098	0.214839
TCONS_00007002	2365.71	0.0159113	0.0793953	0.200407	0.841163	0.946568
TCONS_00010920	2364.89	0.0379229	0.0720914	0.52604	0.598861	0.828828
TCONS_00006388	2358.86	-0.075979	0.0630491	-1.20508	0.228174	0.546053
TCONS_00014377	2357.84	-0.100392	0.0832003	-1.20663	0.227577	0.545504
TCONS_00000115	2354.66	0.148245	0.0665381	2.22797	0.0258823	0.152637
TCONS_00000584	2351.86	0.147322	0.0703759	2.09336	0.036317	0.191317
TCONS_00002921	2347.01	0.0391804	0.0717665	0.545943	0.585105	0.819534
TCONS_00012281	2340.42	-0.251869	0.0731671	-3.44238	0.000576621	0.00881331
TCONS_00000299	2339.19	0.00411245	0.0669831	0.0613954	0.951044	0.980843
TCONS_00007072	2335.72	-0.141967	0.0824835	-1.72116	0.0852213	0.320749
TCONS_00001497	2331.12	-0.073537	0.0668157	-1.10059	0.271073	0.58784
TCONS_00001553	2330.38	-2.44853	0.0778361	-31.4575	3.31611e-217	7.36619e-214
TCONS_00001183	2329.84	-0.0644559	0.0638225	-1.00992	0.312531	0.632466
TCONS_00011919	2327.26	-0.0608361	0.088703	-0.685841	0.492814	0.770492
TCONS_00012667	2326.7	0.211863	0.0660696	3.20667	0.0013428	0.0176846
TCONS_00008644	2325.21	-1.11829	0.0683177	-16.3689	3.18783e-60	1.51741e-57
TCONS_00014206	2325.21	0.0210657	0.068634	0.306928	0.758898	0.912017
TCONS_00004639	2318.37	0.0240664	0.0722163	0.333254	0.738943	0.902716
TCONS_00007487	2316.47	-0.0339969	0.0670405	-0.507109	0.612078	0.836198
TCONS_00002772	2311.42	0.0923328	0.0722982	1.27711	0.201563	0.516026
TCONS_00002487	2309.05	0.258812	0.0700204	3.69624	0.000218819	0.00407322
TCONS_00013172	2297.03	0.157479	0.0661507	2.38062	0.0172838	0.11765
TCONS_00011246	2294.34	0.123789	0.0777679	1.59177	0.111436	0.374489
TCONS_00005059	2292.03	-0.0260375	0.0695031	-0.374624	0.70794	0.887789
TCONS_00012617	2291.01	0.0762369	0.0871859	0.874419	0.38189	0.69173
TCONS_00011697	2290.44	0.0100075	0.0696441	0.143695	0.885741	0.961608
TCONS_00010300	2287.35	0.145954	0.0648202	2.25168	0.0243425	0.147875
TCONS_00008705	2285.5	-0.0326584	0.0715274	-0.456585	0.647969	0.854165
TCONS_00008006	2282.16	0.209774	0.0679488	3.08724	0.00202028	0.0244886
TCONS_00003338	2280.13	0.0800463	0.0821752	0.974093	0.33001	0.646821
TCONS_00001607	2279.77	0.13745	0.0799873	1.7184	0.0857244	0.321718
TCONS_00001606	2277.6	0.181892	0.0748345	2.43059	0.0150745	0.106137
TCONS_00009342	2275.37	0.0205202	0.0820245	0.250172	0.802455	0.929202
TCONS_00005666	2271.93	-0.0270924	0.0811395	-0.333899	0.738456	0.902618
TCONS_00013587	2267.21	-0.104622	0.0926009	-1.12982	0.258553	0.577218
TCONS_00009230	2266.44	0.0749968	0.0758232	0.989101	0.322614	0.641254
TCONS_00011028	2264.44	-0.171864	0.0684485	-2.51086	0.0120439	0.0913087
TCONS_00011652	2262.88	-0.156641	0.0834372	-1.87735	0.0604695	0.265963
TCONS_00004302	2256.64	-0.184957	0.0678101	-2.72758	0.00638012	0.0584026
TCONS_00009251	2256.57	0.0894141	0.0747019	1.19695	0.231328	0.548778
TCONS_00000770	2256.49	0.0643936	0.0698654	0.921681	0.356695	0.670149
TCONS_00001296	2252.63	0.0732033	0.0749357	0.976882	0.328628	0.645255
TCONS_00002225	2249.16	0.131163	0.0708642	1.8509	0.0641838	0.276505
TCONS_00005124	2247.17	-0.0839888	0.0654191	-1.28386	0.199192	0.512317
TCONS_00006189	2246.61	0.0509877	0.0682503	0.747069	0.455022	0.74632
TCONS_00009901	2238.86	0.127919	0.0671446	1.90513	0.0567633	0.255071
TCONS_00003562	2235.96	-0.00354272	0.0644424	-0.0549751	0.956158	0.982989
TCONS_00005713	2235.66	0.126354	0.0706285	1.78899	0.0736168	0.295888
TCONS_00010180	2233.3	-0.0190261	0.0689067	-0.276114	0.78246	0.92037
TCONS_00011227	2230.6	-0.174875	0.0774657	-2.25745	0.02398	0.146591
TCONS_00000996	2229.85	-0.155747	0.0712445	-2.18609	0.0288093	0.16423
TCONS_00006222	2229.75	-0.121556	0.0811934	-1.49711	0.134363	0.414344
TCONS_00014139	2228.42	-0.0695855	0.0741722	-0.938161	0.348161	0.664509
TCONS_00002763	2227.91	-0.143897	0.0704893	-2.0414	0.0412106	0.208525
TCONS_00009785	2227.42	0.136773	0.0833375	1.64119	0.100757	0.353021
TCONS_00005801	2226.77	-0.0137427	0.0813081	-0.16902	0.865781	0.953067
TCONS_00007821	2221.92	0.160872	0.0833884	1.92919	0.0537072	0.245645
TCONS_00014292	2219.03	-0.0034569	0.0804966	-0.0429446	0.965746	0.987529
TCONS_00009458	2214.08	-0.150763	0.0646218	-2.333	0.0196481	0.127892
TCONS_00007382	2208.12	0.132667	0.0683347	1.94142	0.0522069	0.242275
TCONS_00007506	2207.94	0.206704	0.0663155	3.11698	0.00182715	0.0226743
TCONS_00003693	2200.58	0.0127205	0.0784497	0.162149	0.871189	0.954241
TCONS_00013914	2199.07	-0.000860971	0.0762098	-0.0112974	0.990986	0.996369
TCONS_00003843	2192.06	-0.00627491	0.0767396	-0.0817688	0.934831	0.977389
TCONS_00001382	2185.02	0.197979	0.0772352	2.56333	0.0103674	0.0829391
TCONS_00007825	2185.01	-0.0182225	0.0698996	-0.260696	0.794327	0.925384
TCONS_00001768	2183.08	0.0635826	0.0786459	0.808467	0.418822	0.719894
TCONS_00007422	2178.43	0.132208	0.0742199	1.7813	0.0748641	0.298571
TCONS_00012656	2178.02	0.188757	0.0719496	2.62347	0.00870401	0.0729604
TCONS_00012547	2176.13	0.14488	0.0743392	1.94891	0.0513067	0.24078
TCONS_00007683	2175.45	0.010893	0.0777508	0.140101	0.88858	0.963315
TCONS_00001160	2174.25	0.170815	0.0702506	2.4315	0.0150363	0.106137
TCONS_00001194	2167.23	0.0932813	0.0644531	1.44727	0.14782	0.435487
TCONS_00006758	2165.89	0.0391885	0.0648394	0.604394	0.545582	0.801625
TCONS_00007510	2159.91	0.0951987	0.072234	1.31792	0.18753	0.497783
TCONS_00009403	2159.78	-0.168684	0.0737751	-2.28646	0.0222271	0.139605
TCONS_00008022	2156.87	0.0342221	0.0722329	0.473774	0.635661	0.848145
TCONS_00009942	2150.21	0.151229	0.0670209	2.25644	0.024043	0.146591
TCONS_00001514	2146.39	0.16983	0.0722318	2.35118	0.0187141	0.12409
TCONS_00008757	2145.41	-0.30742	0.0664806	-4.6242	3.76047e-06	0.000118206
TCONS_00000963	2144.95	-0.0265628	0.0688609	-0.385746	0.699685	0.883858
TCONS_00007881	2128.44	0.0662702	0.0850536	0.779158	0.435886	0.731859
TCONS_00000214	2124.68	-0.00597136	0.0665094	-0.0897822	0.92846	0.975083
TCONS_00013073	2124.57	0.112219	0.0806636	1.3912	0.164165	0.462187
TCONS_00010597	2120.44	0.154243	0.0686106	2.24809	0.0245707	0.148398
TCONS_00007823	2116.08	0.120959	0.0895746	1.35038	0.176895	0.484119
TCONS_00006310	2115.39	0.0656051	0.0696996	0.941255	0.346574	0.663479
TCONS_00010055	2115	0.168916	0.067831	2.49024	0.0127657	0.0954504
TCONS_00000746	2112.96	-0.159449	0.0787266	-2.02535	0.0428314	0.214802
TCONS_00008125	2111.64	0.0210714	0.0786158	0.268029	0.788677	0.923368
TCONS_00005478	2110.71	0.182112	0.0724629	2.51317	0.0119651	0.0909183
TCONS_00007747	2103.14	0.0897308	0.0809034	1.10911	0.267383	0.584784
TCONS_00002396	2100.5	0.0893093	0.0864001	1.03367	0.30129	0.620073
TCONS_00013218	2098.92	0.0435368	0.0731379	0.59527	0.551663	0.802967
TCONS_00004510	2093.27	0.0731616	0.0911235	0.802885	0.422041	0.721705
TCONS_00011613	2092.23	0.121795	0.0761345	1.59974	0.109656	0.371128
TCONS_00010969	2085.98	0.0956079	0.0659093	1.4506	0.146892	0.434532
TCONS_00007053	2084.82	0.129665	0.0788373	1.64472	0.100027	0.351725
TCONS_00008469	2084.35	0.0805431	0.087057	0.925177	0.354874	0.669599
TCONS_00008003	2084.31	0.0633073	0.0753122	0.840599	0.400573	0.705027
TCONS_00006325	2084.19	-0.414971	0.0694167	-5.97796	2.25944e-09	1.29801e-07
TCONS_00005244	2083.32	-0.0444584	0.0681581	-0.652283	0.514218	0.784765
TCONS_00005951	2081.14	0.0214455	0.0759469	0.282374	0.777656	0.919664
TCONS_00002731	2079.92	0.0339093	0.0766009	0.442674	0.658001	0.859728
TCONS_00008663	2077.94	0.206266	0.0844643	2.44205	0.0146041	0.104084
TCONS_00000769	2077.89	0.0971508	0.0660948	1.46987	0.141597	0.426582
TCONS_00000116	2075.47	0.0434702	0.0974417	0.446115	0.655514	0.858873
TCONS_00005593	2070.59	-0.0336135	0.0752278	-0.446822	0.655003	0.858733
TCONS_00004322	2063.1	0.053595	0.0763556	0.701913	0.482733	0.765632
TCONS_00007800	2063.01	0.0691177	0.0694976	0.994534	0.319963	0.638011
TCONS_00008827	2061.48	0.0116676	0.0663903	0.175742	0.860496	0.952233
TCONS_00011053	2061.2	-0.103146	0.0778261	-1.32534	0.185058	0.4927
TCONS_00011495	2052.83	0.15192	0.0851131	1.78491	0.0742752	0.297279
TCONS_00008807	2048.49	-0.0381748	0.068224	-0.559551	0.575786	0.815847
TCONS_00012983	2046.98	-0.104879	0.0664012	-1.57947	0.114227	0.380035
TCONS_00001767	2046.91	-0.226317	0.0703719	-3.21601	0.00129986	0.0172212
TCONS_00011452	2042.09	0.00787836	0.083726	0.0940969	0.925032	0.974135
TCONS_00002351	2041.61	-0.239425	0.0946141	-2.53054	0.0113887	0.0874359
TCONS_00004169	2041.57	-0.158689	0.0763937	-2.07725	0.0377783	0.196101
TCONS_00005220	2037.71	0.0769812	0.0694696	1.10813	0.267807	0.585008
TCONS_00011078	2037.67	0.126068	0.0713263	1.76748	0.0771475	0.303669
TCONS_00001707	2036.6	-0.210972	0.066185	-3.18762	0.0014345	0.018781
TCONS_00001932	2034.6	0.0565379	0.0897938	0.629642	0.528929	0.792002
TCONS_00014616	2028.76	-0.192758	0.0756389	-2.5484	0.0108219	0.0847438
TCONS_00008666	2025.81	-0.00215746	0.0805389	-0.0267879	0.978629	0.991859
TCONS_00011111	2021.67	-0.0651484	0.0666906	-0.976875	0.328631	0.645255
TCONS_00001482	2021.49	0.104288	0.0721965	1.4445	0.148598	0.436591
TCONS_00004652	2020.94	-0.00582349	0.0691068	-0.084268	0.932843	0.976511
TCONS_00008250	2019.52	-0.103727	0.0884605	-1.17258	0.240964	0.559312
TCONS_00003669	2018.82	-0.0175398	0.0727143	-0.241215	0.809389	0.932049
TCONS_00011894	2018.25	-0.0203591	0.0754522	-0.269828	0.787293	0.922677
TCONS_00004589	2018.15	-0.0897334	0.0808027	-1.11052	0.266773	0.584645
TCONS_00005086	2016.52	0.0780519	0.0736567	1.05967	0.289294	0.610274
TCONS_00014623	2015.29	0.194151	0.0706507	2.74804	0.00599521	0.0560338
TCONS_00003757	2014.09	0.108348	0.0743118	1.45801	0.144837	0.431464
TCONS_00014175	2005.27	-0.24855	0.0687076	-3.61751	0.000297455	0.00518911
TCONS_00014356	2003.31	-0.386831	0.0887353	-4.35938	1.30434e-05	0.000347686
TCONS_00010444	2002.63	0.0210259	0.0664127	0.316594	0.751552	0.90912
TCONS_00010418	2000.9	-0.00462407	0.0676661	-0.0683366	0.945518	0.979295
TCONS_00012019	2000.41	-0.0442638	0.0772063	-0.573318	0.56643	0.812104
TCONS_00000359	1994.6	-0.841058	0.0725326	-11.5956	4.33925e-31	9.32798e-29
TCONS_00014291	1992.42	-0.293792	0.0664603	-4.42057	9.84416e-06	0.000275637
TCONS_00009017	1992.14	-0.0103791	0.0723002	-0.143556	0.885851	0.961608
TCONS_00013436	1991.83	-0.544623	0.0692166	-7.86839	3.59248e-15	3.62731e-13
TCONS_00009639	1990.12	0.0217591	0.0704257	0.308965	0.757348	0.912017
TCONS_00005327	1987.04	-0.0622842	0.0681771	-0.913565	0.360945	0.672634
TCONS_00011275	1981.83	0.0257917	0.0712016	0.362235	0.717176	0.889993
TCONS_00003210	1980.91	0.205813	0.0765531	2.6885	0.00717744	0.0632678
TCONS_00003996	1977.07	0.0840467	0.0671844	1.25098	0.21094	0.529655
TCONS_00004124	1973.37	-0.030143	0.0709465	-0.42487	0.670932	0.868063
TCONS_00007004	1970.74	0.125511	0.0691213	1.8158	0.0694005	0.286901
TCONS_00002251	1969.17	0.0421583	0.0797991	0.528305	0.597288	0.827756
TCONS_00000992	1964.54	0.1368	0.0814173	1.68023	0.0929118	0.337235
TCONS_00012063	1963.27	0.0705362	0.0703159	1.00313	0.315797	0.634859
TCONS_00000360	1962.13	0.0302461	0.0704001	0.429632	0.667463	0.865365
TCONS_00000882	1954.28	0.0126248	0.075043	0.168235	0.866399	0.953067
TCONS_00004218	1952.88	0.0317767	0.0713167	0.445572	0.655907	0.858873
TCONS_00006277	1949.46	0.2212	0.0822465	2.68947	0.00715647	0.0632678
TCONS_00010127	1943.42	-0.081099	0.0704985	-1.15036	0.249994	0.568586
TCONS_00000279	1940.04	-0.172793	0.0863198	-2.00178	0.0453081	0.223158
TCONS_00014168	1935.45	-0.0516734	0.0848688	-0.608862	0.542616	0.800706
TCONS_00009353	1935.31	-0.0393072	0.0767488	-0.512154	0.608543	0.834225
TCONS_00013896	1934.78	0.297235	0.0676976	4.39063	1.13025e-05	0.000311239
TCONS_00008988	1934.11	-0.154199	0.0902617	-1.70836	0.0875704	0.325834
TCONS_00002688	1927.92	0.161478	0.070824	2.27999	0.022608	0.14041
TCONS_00002979	1925.85	0.0344615	0.0692746	0.497462	0.618863	0.8388
TCONS_00003981	1922.71	-0.0877681	0.0704613	-1.24562	0.212903	0.53178
TCONS_00005881	1920.44	0.21384	0.0995673	2.14769	0.0317382	0.175521
TCONS_00000150	1919.81	-0.00825239	0.088574	-0.0931694	0.925769	0.974135
TCONS_00006316	1919.46	0.0441044	0.0801254	0.550443	0.582016	0.81836
TCONS_00002690	1918.3	-0.0555712	0.0708848	-0.783964	0.433061	0.729599
TCONS_00007763	1917.94	0.245908	0.069166	3.55533	0.000377511	0.00628933
TCONS_00010151	1916.89	-0.431014	0.0766697	-5.6217	1.89088e-08	9.26533e-07
TCONS_00002357	1915.9	0.228624	0.0844896	2.70594	0.00681105	0.0609246
TCONS_00009887	1914.56	-0.0206663	0.0741305	-0.278783	0.780412	0.919951
TCONS_00004962	1914	-0.112797	0.0733375	-1.53805	0.124035	0.399696
TCONS_00014207	1913.21	0.267376	0.0822223	3.25187	0.00114648	0.0154346
TCONS_00007670	1911	-0.469928	0.0690968	-6.80102	1.03884e-11	8.04981e-10
TCONS_00002794	1908.58	0.0977479	0.0733903	1.33189	0.182896	0.491059
TCONS_00006891	1902.83	0.193299	0.0706002	2.73794	0.00618248	0.0571024
TCONS_00011631	1902.64	0.242575	0.0695531	3.48763	0.000487329	0.00769563
TCONS_00002593	1897.47	-0.197886	0.0736001	-2.68867	0.00717377	0.0632678
TCONS_00004911	1892.13	0.0466233	0.0772407	0.603611	0.546102	0.801625
TCONS_00001495	1891.8	0.106038	0.0867929	1.22174	0.221805	0.540413
TCONS_00009120	1889.35	0.0802442	0.0878113	0.913826	0.360808	0.672634
TCONS_00012938	1888.51	0.0817152	0.0693061	1.17905	0.238379	0.556999
TCONS_00007201	1885.89	0.341793	0.0716847	4.768	1.86059e-06	6.16866e-05
TCONS_00000161	1884.53	0.0899115	0.0731078	1.22985	0.218754	0.537131
TCONS_00011501	1883.51	-0.0495634	0.0803448	-0.616883	0.537312	0.79836
TCONS_00006441	1883.47	-0.205993	0.0740393	-2.78221	0.00539895	0.0522186
TCONS_00013715	1880.64	-1.83218	0.075696	-24.2044	1.99814e-129	2.21927e-126
TCONS_00003778	1879.36	-0.0139689	0.0754195	-0.185215	0.85306	0.949352
TCONS_00001677	1871.93	0.038132	0.0946414	0.40291	0.687015	0.877567
TCONS_00009817	1870.73	-0.289498	0.0800222	-3.61772	0.000297207	0.00518911
TCONS_00014511	1868.26	-0.0498857	0.0761711	-0.654916	0.512522	0.784079
TCONS_00014353	1864.66	0.0106644	0.0733853	0.14532	0.884458	0.961192
TCONS_00002488	1863.03	0.0260903	0.0725714	0.359512	0.719212	0.890703
TCONS_00010078	1858.45	-0.0548923	0.0834839	-0.65752	0.510847	0.782809
TCONS_00012471	1855.04	0.00250469	0.0733113	0.0341651	0.972745	0.990628
TCONS_00005855	1850.4	-0.0428303	0.0682581	-0.627476	0.530348	0.792394
TCONS_00010701	1836.12	0.134812	0.0717744	1.87828	0.0603431	0.265949
TCONS_00011296	1833.07	0.0743249	0.087437	0.85004	0.395303	0.700984
TCONS_00011470	1827.36	-0.0517662	0.0864969	-0.598474	0.549524	0.802127
TCONS_00004410	1826.12	0.0870006	0.0762486	1.14101	0.253865	0.57214
TCONS_00003258	1825.33	-0.106837	0.136796	-0.78099	0.434808	0.730969
TCONS_00006673	1824.06	0.0280939	0.0685601	0.409771	0.681974	0.874342
TCONS_00007684	1821.3	-0.188779	0.0744224	-2.53658	0.0111941	0.0866406
TCONS_00004518	1820.43	0.170265	0.074315	2.29113	0.0219558	0.138686
TCONS_00014689	1818.42	0.04933	0.0679853	0.725598	0.468085	0.756579
TCONS_00011407	1814.62	0.00730923	0.0722279	0.101197	0.919394	0.973333
TCONS_00008583	1813.87	0.205998	0.0812601	2.53505	0.0112432	0.0867182
TCONS_00009667	1812.22	-0.159323	0.079117	-2.01376	0.0440344	0.218305
TCONS_00000356	1809	0.020433	0.0706949	0.28903	0.772558	0.918197
TCONS_00010452	1806.31	0.0360588	0.0769214	0.468775	0.639231	0.850157
TCONS_00010473	1805.38	0.128433	0.0781699	1.64299	0.100384	0.352084
TCONS_00011024	1802.32	0.0438968	0.0846343	0.518664	0.603995	0.8327
TCONS_00012525	1801.54	0.0674565	0.0878516	0.767846	0.442579	0.736783
TCONS_00006903	1800.85	0.1083	0.0766265	1.41335	0.157554	0.449653
TCONS_00014067	1797.82	0.094621	0.0717106	1.31948	0.187007	0.496896
TCONS_00001317	1797.73	0.135217	0.0892233	1.51549	0.129649	0.407832
TCONS_00001340	1785.95	-0.0356849	0.0770452	-0.463169	0.643243	0.852092
TCONS_00007599	1785.86	0.225303	0.104259	2.161	0.0306952	0.171893
TCONS_00001789	1784.59	-0.239651	0.0783426	-3.05901	0.00222072	0.0263326
TCONS_00011766	1783.41	-0.266598	0.0702074	-3.79729	0.000146287	0.00285045
TCONS_00003010	1782.39	-0.475258	0.0827637	-5.74235	9.33716e-09	4.86116e-07
TCONS_00007859	1779.92	-0.138469	0.0713116	-1.94175	0.0521673	0.242275
TCONS_00002920	1775.6	-0.0894448	0.0769088	-1.163	0.24483	0.563575
TCONS_00002220	1772.71	0.104517	0.0749183	1.39508	0.162992	0.460051
TCONS_00013848	1768.91	0.127528	0.0830843	1.53493	0.124801	0.400996
TCONS_00006806	1764.53	0.0888115	0.0793761	1.11887	0.263196	0.581736
TCONS_00007891	1760.55	-0.110844	0.0691157	-1.60375	0.10877	0.369253
TCONS_00004799	1760.04	0.178181	0.0795954	2.23859	0.0251826	0.150508
TCONS_00001990	1759.23	-0.0214865	0.0787862	-0.272719	0.785069	0.921886
TCONS_00008844	1758.75	-0.642441	0.0776307	-8.2756	1.2781e-16	1.44361e-14
TCONS_00003589	1755.41	-2.89464	0.0979553	-29.5506	6.45377e-192	1.0752e-188
TCONS_00003266	1754.81	0.0133254	0.0818883	0.162726	0.870734	0.954241
TCONS_00013982	1754.05	-0.0998204	0.0727613	-1.37189	0.170098	0.472897
TCONS_00009166	1747.46	0.16244	0.0774236	2.09807	0.0358991	0.189716
TCONS_00014711	1745.54	-0.49693	0.0739748	-6.71756	1.84797e-11	1.33858e-09
TCONS_00003926	1742.47	0.0427183	0.075604	0.565027	0.572055	0.814349
TCONS_00000751	1740.7	-0.0504231	0.0848688	-0.59413	0.552425	0.803107
TCONS_00008048	1740.49	0.492469	0.0889537	5.53624	3.09033e-08	1.46056e-06
TCONS_00011996	1739.16	0.0891907	0.0828301	1.07679	0.281573	0.601991
TCONS_00005000	1737.47	0.0522447	0.0716175	0.729496	0.465698	0.754538
TCONS_00001929	1737.15	0.0587434	0.0688117	0.853684	0.39328	0.700192
TCONS_00001220	1736.16	0.0251478	0.0745102	0.337508	0.735734	0.902215
TCONS_00007192	1735.16	0.119377	0.0704803	1.69377	0.0903099	0.332133
TCONS_00000165	1734.7	-0.0859368	0.0744031	-1.15502	0.248084	0.566451
TCONS_00008522	1732.65	0.271567	0.068739	3.9507	7.79238e-05	0.0016581
TCONS_00011806	1727.7	0.171725	0.0689937	2.489	0.0128102	0.0955961
TCONS_00013760	1720.04	0.265127	0.0768756	3.44878	0.000563132	0.0086468
TCONS_00008449	1716.82	-0.0220823	0.086576	-0.255062	0.798675	0.927616
TCONS_00009558	1716.69	0.0878617	0.0750412	1.17085	0.24166	0.559758
TCONS_00001586	1711.46	0.185684	0.0710715	2.61264	0.00898465	0.0743001
TCONS_00001173	1711.46	-0.34953	0.0783267	-4.46247	8.10203e-06	0.000240896
TCONS_00002032	1711.04	-0.722078	0.104521	-6.90846	4.89933e-12	3.93363e-10
TCONS_00005223	1710.93	0.0336788	0.0847214	0.397524	0.690981	0.879935
TCONS_00006616	1710.22	0.0857842	0.0691887	1.23986	0.215028	0.533119
TCONS_00001282	1702.97	0.173567	0.0705176	2.46133	0.0138421	0.10072
TCONS_00014142	1702.62	-0.270939	0.0697642	-3.88365	0.000102902	0.002078
TCONS_00013883	1702.33	0.0620884	0.0729397	0.851229	0.394642	0.700783
TCONS_00004107	1701.6	-0.0775803	0.0893335	-0.868435	0.385156	0.69426
TCONS_00000355	1700.91	-0.0335734	0.0729085	-0.460487	0.645167	0.853223
TCONS_00002974	1700.85	0.00319695	0.0756029	0.0422861	0.966271	0.987763
TCONS_00008096	1696.81	-0.285019	0.0928581	-3.0694	0.00214488	0.0256616
TCONS_00005052	1695.58	0.0234792	0.0725924	0.323438	0.746363	0.906498
TCONS_00000090	1690.9	0.0321619	0.0785122	0.409642	0.682069	0.874342
TCONS_00009016	1680.42	0.165666	0.0721318	2.29672	0.0216348	0.137048
TCONS_00006744	1674.09	0.0436918	0.0770188	0.567288	0.570519	0.814294
TCONS_00003316	1666.94	0.315066	0.0697871	4.51467	6.34156e-06	0.000192092
TCONS_00006940	1665.4	-0.132535	0.0753255	-1.7595	0.078493	0.307247
TCONS_00004995	1662.84	0.692692	0.0710237	9.75298	1.79136e-22	2.98441e-20
TCONS_00005235	1662.2	0.00737784	0.0803498	0.0918215	0.92684	0.974135
TCONS_00013114	1661.53	0.18533	0.0778788	2.37972	0.0173259	0.117816
TCONS_00014078	1656.01	0.321822	0.0848979	3.79069	0.000150228	0.0029018
TCONS_00010591	1655.66	0.194608	0.0973418	1.99922	0.0455843	0.224353
TCONS_00004997	1654.69	0.117931	0.0756985	1.5579	0.119256	0.390285
TCONS_00004188	1653.3	-0.216888	0.0814933	-2.66141	0.00778131	0.0672722
TCONS_00011573	1650.2	-0.289855	0.0724807	-3.99907	6.3593e-05	0.00138491
TCONS_00000691	1649.87	0.000198394	0.0689223	0.00287853	0.997703	0.999087
TCONS_00004009	1645.01	0.0581833	0.0709278	0.820318	0.412035	0.713195
TCONS_00007438	1642.99	0.0511484	0.0735096	0.695805	0.486551	0.768249
TCONS_00011651	1642.56	-0.0448271	0.0691615	-0.648151	0.516887	0.786424
TCONS_00014729	1642.21	0.00361585	0.0780926	0.0463021	0.963069	0.98665
TCONS_00005787	1641.29	-5.27872e-05	0.0701187	-0.000752826	0.999399	0.999849
TCONS_00010880	1641.22	-0.0778622	0.0773501	-1.00662	0.314117	0.63334
TCONS_00004708	1631.3	0.077508	0.0767741	1.00956	0.312706	0.632519
TCONS_00002656	1628.65	-0.0779016	0.0901043	-0.864571	0.387274	0.694743
TCONS_00011856	1625.63	0.0240528	0.0854831	0.281375	0.778423	0.919664
TCONS_00013576	1624.84	0.0892421	0.0748503	1.19227	0.233154	0.550775
TCONS_00003581	1623.66	0.035639	0.0739119	0.482182	0.629677	0.844129
TCONS_00000838	1623.66	-0.0563936	0.081717	-0.690108	0.490126	0.769521
TCONS_00014000	1623.32	-0.566544	0.081923	-6.91556	4.66003e-12	3.78713e-10
TCONS_00005392	1622.76	-0.10557	0.0727758	-1.45062	0.146884	0.434532
TCONS_00006990	1622.04	0.111228	0.0727763	1.52835	0.126426	0.403112
TCONS_00014374	1621.01	-0.0407274	0.0702039	-0.580131	0.561826	0.808991
TCONS_00008650	1616.96	0.0768061	0.0743509	1.03302	0.301594	0.620145
TCONS_00011780	1616.7	-0.330344	0.0741433	-4.45549	8.37032e-06	0.000243147
TCONS_00005481	1613.24	0.0665104	0.0772651	0.860808	0.389344	0.696533
TCONS_00009791	1611.83	0.00232465	0.0786706	0.0295491	0.976427	0.991133
TCONS_00000425	1611.56	0.0600918	0.0828914	0.724946	0.468485	0.756845
TCONS_00004915	1608.97	0.0147729	0.0812943	0.181721	0.855802	0.950178
TCONS_00008762	1607.45	-0.327929	0.0705231	-4.64996	3.32007e-06	0.000105357
TCONS_00010822	1604.9	-0.576472	0.0861464	-6.69177	2.20492e-11	1.57996e-09
TCONS_00005510	1603.24	0.0058223	0.0759607	0.0766488	0.938903	0.978806
TCONS_00008247	1602.83	0.053096	0.0733838	0.723539	0.469349	0.757506
TCONS_00001195	1600.46	0.0730181	0.0867287	0.841914	0.399836	0.704377
TCONS_00000205	1599.36	0.0515459	0.0758162	0.67988	0.496581	0.772098
TCONS_00007173	1597.39	0.134166	0.0969811	1.38342	0.166536	0.46748
TCONS_00007024	1591.74	-0.190935	0.0734737	-2.59868	0.0093583	0.0767082
TCONS_00009768	1591.1	-0.0153644	0.0764345	-0.201013	0.840688	0.946568
TCONS_00001093	1588.16	-0.0331239	0.087136	-0.38014	0.703841	0.885378
TCONS_00001292	1588.15	0.0282761	0.0747607	0.378221	0.705266	0.886438
TCONS_00011037	1587.2	-0.0536582	0.0846773	-0.633678	0.526291	0.791164
TCONS_00003523	1585.09	0.0800626	0.105361	0.75989	0.447321	0.740298
TCONS_00008461	1584.82	0.177403	0.086272	2.05632	0.039752	0.202994
TCONS_00002905	1584	-0.00562265	0.0725701	-0.0774788	0.938243	0.978683
TCONS_00003065	1579.77	0.109799	0.0771657	1.42289	0.154767	0.444939
TCONS_00003979	1572.97	0.114547	0.0771896	1.48397	0.137816	0.421093
TCONS_00013653	1572.38	0.156139	0.0856573	1.82283	0.0683284	0.284726
TCONS_00003314	1572.02	-0.153962	0.0972905	-1.5825	0.113535	0.378868
TCONS_00003291	1565.63	-0.0455846	0.0713459	-0.638925	0.522872	0.789687
TCONS_00008570	1564.86	0.149167	0.0760753	1.96079	0.0499039	0.236866
TCONS_00008297	1561.73	0.0984693	0.090231	1.0913	0.27514	0.593184
TCONS_00002190	1560.22	-0.0191895	0.0766992	-0.250192	0.802439	0.929202
TCONS_00001773	1547.67	-0.068759	0.0740382	-0.928697	0.353046	0.668761
TCONS_00006684	1542.11	0.263476	0.106535	2.47315	0.0133927	0.0982205
TCONS_00003793	1541.81	0.00116934	0.0788174	0.0148361	0.988163	0.995784
TCONS_00010889	1541.44	-0.0390647	0.0715855	-0.545707	0.585267	0.819546
TCONS_00006873	1540.81	0.0355214	0.08528	0.416527	0.677024	0.871151
TCONS_00009113	1538.67	-0.0207275	0.0706485	-0.29339	0.769224	0.916359
TCONS_00009367	1537.69	0.0672313	0.0777564	0.864641	0.387236	0.694743
TCONS_00007922	1537.68	-0.0143856	0.0722174	-0.199198	0.842108	0.946616
TCONS_00009787	1531.25	0.1782	0.0883232	2.01759	0.0436342	0.217161
TCONS_00012796	1530.47	-0.0370587	0.0856211	-0.432822	0.665144	0.863556
TCONS_00006244	1530.17	0.0966166	0.0945832	1.0215	0.307018	0.627021
TCONS_00012318	1521.44	0.142822	0.093854	1.52175	0.128072	0.405189
TCONS_00013030	1517.57	-0.104784	0.10619	-0.986755	0.323763	0.642321
TCONS_00004888	1516.87	-0.0866483	0.0825925	-1.04911	0.294129	0.615677
TCONS_00005726	1516.39	0.00317219	0.0808693	0.0392262	0.96871	0.98922
TCONS_00013425	1516.34	-0.0431044	0.0723468	-0.595802	0.551307	0.802967
TCONS_00007224	1515.35	-0.0955737	0.0720917	-1.32572	0.184931	0.4927
TCONS_00011154	1514.22	-0.0762278	0.0729588	-1.04481	0.296113	0.6182
TCONS_00005638	1514	0.253797	0.0892809	2.84268	0.00447363	0.0451018
TCONS_00004417	1509.68	0.190949	0.0749005	2.54937	0.0107917	0.0846066
TCONS_00000022	1509.53	0.24411	0.073732	3.31077	0.000930397	0.0129499
TCONS_00011223	1508.42	0.0673814	0.0849043	0.793616	0.427419	0.725251
TCONS_00002830	1508.09	0.24026	0.0817629	2.93849	0.00329813	0.0361938
TCONS_00013384	1504.86	0.112571	0.0758533	1.48406	0.137792	0.421093
TCONS_00012795	1500.29	0.136605	0.0803175	1.70081	0.0889783	0.329052
TCONS_00014364	1496.04	-0.245633	0.0920436	-2.66866	0.00761547	0.0659941
TCONS_00007181	1494.93	0.269678	0.0991161	2.72083	0.00651185	0.0588806
TCONS_00011124	1493.44	-0.000128959	0.0781955	-0.00164919	0.998684	0.999332
TCONS_00008512	1492.68	0.0640227	0.0701106	0.913167	0.361155	0.672836
TCONS_00013765	1490.59	0.155312	0.0785944	1.97612	0.0481409	0.232809
TCONS_00008216	1490.36	0.14479	0.0745564	1.94202	0.0521352	0.242275
TCONS_00000906	1487.13	0.0223684	0.0840395	0.266165	0.790112	0.92371
TCONS_00001721	1485.66	0.104753	0.0862957	1.21389	0.22479	0.542798
TCONS_00011641	1484.88	-0.0306904	0.0744836	-0.412042	0.680309	0.873677
TCONS_00005844	1484.38	0.0422027	0.0743006	0.568	0.570035	0.814127
TCONS_00009935	1483.08	0.187513	0.0858687	2.18372	0.0289827	0.164796
TCONS_00010545	1478.13	0.104824	0.0821754	1.27562	0.202091	0.516583
TCONS_00013724	1477.85	0.131753	0.0748874	1.75935	0.0785176	0.307247
TCONS_00008255	1477.4	-0.0917994	0.088793	-1.03386	0.301202	0.620073
TCONS_00000043	1477.3	0.277212	0.078059	3.55131	0.000383319	0.00635432
TCONS_00012501	1476.87	0.0951232	0.0925362	1.02796	0.30397	0.62387
TCONS_00003239	1476.37	0.124487	0.0748754	1.66259	0.0963952	0.342419
TCONS_00006936	1475.09	0.182307	0.0788897	2.31092	0.0208375	0.133649
TCONS_00008882	1473.49	-0.129387	0.0838306	-1.54343	0.122726	0.397205
TCONS_00002337	1473.19	0.0815104	0.081431	1.00098	0.316838	0.634859
TCONS_00002048	1467.1	-0.0721169	0.0741745	-0.972259	0.330922	0.647654
TCONS_00002846	1466.69	0.0605404	0.0719116	0.841873	0.399859	0.704377
TCONS_00012248	1465.79	0.0606676	0.0907965	0.668171	0.504024	0.776965
TCONS_00002865	1465.72	0.310796	0.0759665	4.09122	4.29115e-05	0.000999868
TCONS_00006036	1465.08	-0.0841242	0.0935242	-0.89949	0.368392	0.678204
TCONS_00009189	1461.14	0.0139406	0.0733445	0.19007	0.849255	0.949352
TCONS_00012646	1459.69	0.133846	0.0752353	1.77904	0.075234	0.299334
TCONS_00008000	1458.63	-0.121058	0.0778264	-1.55549	0.119829	0.391445
TCONS_00011877	1456.37	0.119122	0.0788203	1.51131	0.13071	0.409489
TCONS_00003014	1453.42	0.217879	0.0756787	2.879	0.00398933	0.0416691
TCONS_00012137	1452.97	0.230949	0.0809687	2.85232	0.00434015	0.0441569
TCONS_00009914	1452.16	0.0907958	0.0719529	1.26188	0.206993	0.52369
TCONS_00009587	1452	0.263867	0.0969536	2.72158	0.00649711	0.0588806
TCONS_00009778	1449.8	0.165202	0.0828112	1.99492	0.046052	0.225655
TCONS_00001276	1449.39	0.0674613	0.0775546	0.869856	0.384379	0.693235
TCONS_00011733	1447.47	0.0180329	0.090939	0.198296	0.842813	0.946616
TCONS_00007411	1445.66	-0.0516297	0.0750637	-0.687812	0.491571	0.770058
TCONS_00003452	1441.56	-0.087005	0.0848424	-1.02549	0.305133	0.624702
TCONS_00010373	1441.5	-0.552405	0.0815791	-6.7714	1.27546e-11	9.3403e-10
TCONS_00007256	1438.51	-0.354671	0.0828081	-4.28305	1.84348e-05	0.000479882
TCONS_00009175	1436.48	0.116529	0.082899	1.40567	0.159821	0.454566
TCONS_00009461	1435.03	0.0534606	0.0789404	0.677227	0.498262	0.773089
TCONS_00007912	1434.45	0.00323644	0.0723939	0.044706	0.964342	0.98665
TCONS_00006837	1430.55	0.0580774	0.074673	0.777756	0.436713	0.731955
TCONS_00002392	1428.65	0.153219	0.076918	1.99198	0.0463732	0.226337
TCONS_00002962	1427.62	-0.0010428	0.0756893	-0.0137774	0.989008	0.996183
TCONS_00014096	1425.36	-0.0294243	0.0748109	-0.393316	0.694086	0.881715
TCONS_00010938	1423.71	-0.0909498	0.0999228	-0.910201	0.362717	0.674991
TCONS_00011590	1423.11	0.217088	0.071377	3.04143	0.00235457	0.0276734
TCONS_00013742	1422.01	0.1686	0.0755084	2.23287	0.0255576	0.151527
TCONS_00002862	1420.93	-0.0537452	0.0835982	-0.6429	0.520289	0.788575
TCONS_00009593	1419.96	-0.0557053	0.0817261	-0.681609	0.495486	0.771837
TCONS_00013108	1419.31	0.0960518	0.138747	0.692279	0.488762	0.768717
TCONS_00007839	1417.15	0.172352	0.0975731	1.76639	0.0773309	0.303852
TCONS_00004906	1416.02	0.115725	0.0869691	1.33064	0.183306	0.491059
TCONS_00007322	1412.26	0.00330716	0.0741846	0.0445801	0.964442	0.98665
TCONS_00003876	1410.27	0.0848554	0.0744688	1.13948	0.254505	0.572206
TCONS_00012495	1407.49	-0.00370649	0.0771466	-0.0480448	0.961681	0.986102
TCONS_00012994	1405.82	-0.121643	0.0772102	-1.57548	0.115146	0.381757
TCONS_00008206	1405.77	0.223009	0.0758554	2.93992	0.003283	0.0361938
TCONS_00012953	1403.1	0.0385477	0.0786767	0.489951	0.624169	0.841632
TCONS_00010120	1402.77	0.104873	0.0778298	1.34746	0.177831	0.48469
TCONS_00000125	1402.66	0.252818	0.0833782	3.03219	0.0024279	0.0283428
TCONS_00011121	1401.82	-0.0729167	0.0761725	-0.957258	0.338437	0.655053
TCONS_00005191	1401.61	0.0692898	0.091741	0.755276	0.450084	0.742599
TCONS_00008228	1399.54	-0.00807934	0.0728667	-0.110878	0.911713	0.971787
TCONS_00000566	1394.13	0.245514	0.0914176	2.68563	0.00723938	0.0634779
TCONS_00001127	1392.7	0.204415	0.0798664	2.55946	0.0104834	0.0833103
TCONS_00013189	1389.67	-0.18474	0.0744581	-2.48113	0.0130966	0.0970812
TCONS_00011882	1389.03	0.00771865	0.0901478	0.0856221	0.931767	0.976304
TCONS_00001563	1388.74	-0.16385	0.0793146	-2.06582	0.0388453	0.20005
TCONS_00010687	1387.59	0.0648093	0.0722169	0.897426	0.369492	0.679066
TCONS_00002135	1387.53	-0.189972	0.0851164	-2.23191	0.0256211	0.151633
[truncated: 4,665 more rows]

## Sheet: Annotated Unigenes
GeneID	Base mean	log2(FC)	StdErr	Wald-Stats	P-value	P-adj	Protein Id
TCONS_00013973	4.1546e+06	-0.280397	0.0692777	-4.04744	5.17812e-05	0.00117371	A0A0H5QGS0
TCONS_00009401	1.56129e+06	-0.371672	0.0475087	-7.82323	5.1483e-15	5.12064e-13	O93662
TCONS_00007641	885957	-0.224603	0.0545486	-4.1175	3.83011e-05	0.000911566	Q5E5Y7
TCONS_00004285	824837	-0.0205877	0.060746	-0.338915	0.734674	0.901467	P46436
TCONS_00003712	758892	0.0415754	0.0529016	0.7859	0.431926	0.728882	Q9USQ7
TCONS_00009668	727143	0.0693033	0.056594	1.22457	0.220738	0.53942	A0A0H5RFQ6
TCONS_00012303	599392	-0.120963	0.0468582	-2.58147	0.00983803	0.0798546	Q9S9N1
TCONS_00011666	595980	0.067166	0.0590813	1.13684	0.255605	0.572748	P56517
TCONS_00008277	543367	-0.0385002	0.0552975	-0.696236	0.486281	0.768249	A0A0H5R6B2
TCONS_00010336	540257	-0.244443	0.0466913	-5.23529	1.64722e-07	6.77597e-06	O43301
TCONS_00013141	528853	-0.250961	0.049782	-5.0412	4.62623e-07	1.73198e-05	P21187
TCONS_00009270	528167	-0.00770976	0.124259	-0.0620459	0.950526	0.980695	Q03968
TCONS_00011228	523612	-0.0064602	0.0651766	-0.0991185	0.921044	0.973333	A0A0H5R7N9
TCONS_00008676	464739	0.147194	0.0533395	2.75957	0.00578781	0.0546523	A0A0H5R4V9
TCONS_00008377	398261	-0.125284	0.0478647	-2.61746	0.00885873	0.0740606	P9WM78
TCONS_00003365	374269	-0.150831	0.0501097	-3.01002	0.00261233	0.0300148	O53176
TCONS_00002589	328613	-0.0917738	0.0512546	-1.79055	0.0733657	0.295744	P42327
TCONS_00003681	300383	-0.18316	0.0470705	-3.89118	9.97585e-05	0.00202573	Q9P6I8
TCONS_00000669	273898	-0.0354365	0.0455097	-0.778658	0.436181	0.731925	O82709
TCONS_00006095	257628	-0.0116638	0.0612369	-0.19047	0.84894	0.949352	Q9URY9
TCONS_00005460	244641	-0.123491	0.0643933	-1.91776	0.0551417	0.249298	A0A0H5QW83
TCONS_00013853	233635	-0.275309	0.0536324	-5.13327	2.84758e-07	1.10327e-05	A0A0H5RCS7
TCONS_00010947	215702	0.0318251	0.0564616	0.56366	0.572986	0.814349	Q43209
TCONS_00005451	203097	-0.0812871	0.0634421	-1.28128	0.200095	0.513848	A0A0H5RCL1
TCONS_00000060	190593	0.0538925	0.0517427	1.04155	0.297622	0.618342	Q2V3E2
TCONS_00009056	152924	0.121979	0.0634339	1.92293	0.0544889	0.248029	A0A0H5RDS5
TCONS_00000624	152300	-0.126151	0.0505581	-2.49517	0.0125897	0.0944795	P24423
TCONS_00005995	148896	0.0740848	0.0547717	1.35261	0.17618	0.482757	A0A0H5RDY3
TCONS_00010505	146399	-0.132733	0.0478428	-2.77436	0.00553111	0.0530418	Q8BWQ5
TCONS_00009975	142609	0.157889	0.0476915	3.31064	0.000930825	0.0129499	P9WLM0
TCONS_00002445	140904	-0.0575477	0.0461468	-1.24706	0.212377	0.531061	Q4UKR8
TCONS_00000830	140090	-0.119226	0.0560588	-2.1268	0.0334368	0.182193	P37512
TCONS_00006352	124879	0.0299019	0.0497914	0.600543	0.548144	0.801625	A0A0H5RA78
TCONS_00013687	124503	-0.221272	0.0554258	-3.99222	6.54571e-05	0.00141625	A0A0H5R1H5
TCONS_00003670	119348	-0.125807	0.04818	-2.61119	0.00902272	0.0745073	Q9P6I8
TCONS_00008588	102063	-0.0175663	0.0536505	-0.327421	0.743349	0.905182	Q9LVC3
TCONS_00011399	97896.9	-0.172267	0.0479607	-3.59183	0.000328361	0.00559642	A5D1G8
TCONS_00007349	97795.9	-0.2159	0.0487111	-4.43226	9.32518e-06	0.000263318	Q60HE9
TCONS_00011903	97546.5	-0.222953	0.0499875	-4.46017	8.18961e-06	0.000240896	Q54SJ5
TCONS_00003789	96860.2	0.0882119	0.0513587	1.71756	0.0858763	0.321867	Q9DG68
TCONS_00005192	94905	0.0306593	0.046895	0.653787	0.513249	0.784293	A0A0H5R1U2
TCONS_00010064	91770.3	-0.171395	0.0498418	-3.43878	0.000584339	0.00887023	P90519
TCONS_00002457	87627.2	0.0140255	0.0525967	0.266662	0.78973	0.92371	Q4UKR8
TCONS_00008585	86286.5	-0.0146458	0.0551446	-0.26559	0.790555	0.92371	A0A0H5R696
TCONS_00001623	85034.8	-0.0637262	0.0501898	-1.2697	0.20419	0.519756	A3KPW9
TCONS_00011682	82425.5	-0.00442603	0.0693614	-0.0638111	0.949121	0.980307	O70279
TCONS_00002913	79765.3	-0.163725	0.0471753	-3.47057	0.000519353	0.00808637	Q557D2
TCONS_00003907	75270.8	-0.283184	0.0470837	-6.01447	1.80478e-09	1.04583e-07	P25867
TCONS_00000061	72817.3	-0.0149979	0.0761112	-0.197052	0.843787	0.946792	Q6ZTR5
TCONS_00006754	70966.6	0.107719	0.0471636	2.28395	0.0223744	0.13985	Q9XIF8
TCONS_00008353	70124.8	-0.099709	0.0477912	-2.08635	0.0369472	0.193615	A0A0H5QII9
TCONS_00003534	70063.3	0.130562	0.0499445	2.61414	0.00894513	0.0741824	Q5WR10
TCONS_00010200	66607.8	-0.0636563	0.0507152	-1.25517	0.209416	0.527495	Q54BL9
TCONS_00005111	66153.6	-0.00555006	0.0503021	-0.110335	0.912144	0.971787	P42643
TCONS_00006246	65752.7	-0.0107103	0.0469577	-0.228085	0.81958	0.936705	O60105
TCONS_00010698	64179.5	-0.0635002	0.0466057	-1.3625	0.173041	0.478087	A0A0H5R4H8
TCONS_00012929	63505.9	0.018877	0.0683983	0.275986	0.782559	0.92037	P49800
TCONS_00012932	62866.6	0.0179463	0.0691355	0.259582	0.795187	0.925449	A0A0H5QN30
TCONS_00001842	62288.5	0.0656251	0.0483989	1.35592	0.175124	0.481051	Q99NB9
TCONS_00010197	60786.4	-0.0619127	0.0507476	-1.22001	0.22246	0.540852	A0A0H5RTR6
TCONS_00009660	60693.7	-0.0909022	0.0496879	-1.82946	0.0673304	0.283443	P72699
TCONS_00000223	59466.4	-0.0380887	0.0506895	-0.751411	0.452406	0.744374	A0A0H5RK36
TCONS_00011972	58767.2	-0.213893	0.0701052	-3.05103	0.00228058	0.0269464	P71741
TCONS_00010525	57891.4	0.0477052	0.0487873	0.97782	0.328163	0.645255	Q6GLW1
TCONS_00002459	57456.1	-0.0180456	0.0563977	-0.319971	0.748991	0.907834	P92948
TCONS_00001819	57321.9	0.0682274	0.047236	1.44439	0.148629	0.436591	A0A0H5R623
TCONS_00009326	56939.9	-0.181168	0.058183	-3.11376	0.00184722	0.0227961	Q4U2R1
TCONS_00004271	56085.9	-0.0184712	0.0479553	-0.385176	0.700107	0.883858	P46436
TCONS_00007812	55327.1	0.088325	0.0527244	1.67522	0.0938913	0.338322	A0A0H5R8Y3
TCONS_00004438	55089.4	-0.170157	0.0466089	-3.65074	0.00026149	0.0047216	A0A0H5R6J7
TCONS_00007466	54530.7	-0.0436843	0.0482399	-0.905564	0.365167	0.676904	Q9DC48
TCONS_00009976	54162.7	-0.358908	0.0568381	-6.31457	2.70913e-10	1.73593e-08	Q6ML19
TCONS_00012943	52699.5	-0.0716704	0.0511561	-1.40102	0.16121	0.457008	Q03923
TCONS_00004209	52698.1	-0.0427083	0.0571684	-0.747061	0.455027	0.74632	A0A0H5R189
TCONS_00010266	51784.9	-0.208387	0.0470124	-4.4326	9.31019e-06	0.000263318	Q9P6I2
TCONS_00002042	51771.8	0.2533	0.0493348	5.13431	2.83174e-07	1.10327e-05	P46266
TCONS_00013758	51051.8	-0.198221	0.0484202	-4.09377	4.24418e-05	0.000992393	P10978
TCONS_00005012	50775.3	-0.148177	0.0510049	-2.90516	0.00367063	0.0394533	O34812
TCONS_00003912	50756.8	0.00492504	0.0473523	0.104009	0.917163	0.973189	Q2KHZ2
TCONS_00008975	50702.6	-0.246392	0.0482258	-5.10913	3.23647e-07	1.23245e-05	A0A0H5RDE2
TCONS_00000865	50059.2	-0.17017	0.0575756	-2.9556	0.00312063	0.0348339	P18395
TCONS_00004839	49239.4	-0.0344313	0.0636847	-0.540652	0.588747	0.821844	Q54XS2
TCONS_00009152	48862.7	-0.4242	0.0788157	-5.38218	7.35908e-08	3.21155e-06	P34799
TCONS_00012122	48507.5	0.0475506	0.0598647	0.794301	0.42702	0.725251	Q9M076
TCONS_00000885	48250.6	-0.182556	0.0558626	-3.26795	0.0010833	0.0146826	P18395
TCONS_00013952	46293.2	-0.294065	0.0604044	-4.86826	1.12584e-06	3.92807e-05	B2HGZ9
TCONS_00009377	46167.1	-0.197857	0.0592385	-3.34	0.000837791	0.0118536	P34795
TCONS_00001196	45711.8	-0.130429	0.0506824	-2.57346	0.0100689	0.0810374	A0A0H5QMC3
TCONS_00008453	45198.7	-0.0939245	0.0732997	-1.28138	0.200061	0.513848	Q55855
TCONS_00003423	45111.5	0.0304314	0.0478316	0.636219	0.524634	0.79078	Q9XHM1
TCONS_00003115	45070.2	-0.208235	0.0476325	-4.3717	1.23284e-05	0.000331277	Q6K548
TCONS_00006753	45032.5	0.476904	0.0576531	8.27196	1.31775e-16	1.46358e-14	Q96RL7
TCONS_00007809	44961.8	0.0711029	0.0807476	0.880558	0.378557	0.688255	A0A0H5R722
TCONS_00009840	44539.8	-0.084411	0.0503181	-1.67755	0.0934359	0.338216	C5CGP2
TCONS_00013129	44435.2	-0.0715268	0.0485908	-1.47202	0.141014	0.42567	P24423
TCONS_00005776	44031.9	-0.00812641	0.0482832	-0.168307	0.866342	0.953067	Q9ULH0
TCONS_00004563	43720.9	-0.0888573	0.0529152	-1.67924	0.0931054	0.33757	A0A0H5RC35
TCONS_00003544	43677.6	-0.0373891	0.0525218	-0.711878	0.47654	0.762574	Q5ZJC7
TCONS_00005869	43370.3	0.169912	0.0609006	2.78999	0.00527096	0.0512784	Q66IF1
TCONS_00006042	43002.9	-0.0594303	0.0578148	-1.02794	0.303977	0.62387	B3A0R0
TCONS_00008315	42880.9	0.0846276	0.0593514	1.42587	0.153905	0.444021	O74803
TCONS_00009488	42149.6	-0.013086	0.0565885	-0.231248	0.817122	0.936229	Q9UR07
TCONS_00008796	42110	0.0531849	0.0769156	0.691471	0.48927	0.769044	Q8H715
TCONS_00000702	42055.1	0.082312	0.0475901	1.7296	0.0837013	0.317104	Q5RC43
TCONS_00004170	41539.5	-0.125359	0.120263	-1.04238	0.297237	0.618342	F8RP11
TCONS_00004432	41266.6	0.00251108	0.0492966	0.0509382	0.959375	0.985096	Q8H715
TCONS_00009517	41157.2	-0.164029	0.0554023	-2.9607	0.00306942	0.0343775	A0A0H5QHS2
TCONS_00003282	40736.8	-0.0794816	0.0492504	-1.61383	0.106565	0.364513	Q9FJR0
TCONS_00010504	40608.1	-0.0873433	0.0525092	-1.66339	0.0962343	0.342214	P25323
TCONS_00009577	39743.8	-0.0546891	0.0494283	-1.10643	0.268539	0.585968	Q6ID70
TCONS_00011969	39345.4	0.122243	0.0477746	2.55873	0.0105054	0.0833226	Q9Z1A6
TCONS_00013580	39110.8	-0.103609	0.0506556	-2.04536	0.0408195	0.207175	P16423
TCONS_00007206	37549.7	-0.252623	0.0521517	-4.844	1.27248e-06	4.41656e-05	Q5UPF8
TCONS_00006698	37168.4	-0.165342	0.0486028	-3.4019	0.000669181	0.00990983	Q9VTF9
TCONS_00000513	37102.6	0.0802726	0.0530543	1.51303	0.130272	0.409023	Q12904
TCONS_00010205	36735.1	-0.173394	0.0473332	-3.66325	0.000249033	0.00453431	Q9FNU2
TCONS_00009457	36519.9	-0.0450616	0.0755259	-0.596637	0.55075	0.802579	Q03427
TCONS_00012058	36386.3	-0.0678664	0.0608423	-1.11545	0.264659	0.583247	Q54XD8
TCONS_00008895	36299.2	-0.197224	0.0472501	-4.17405	2.99226e-05	0.000725106	A0A0H5RVV7
TCONS_00002944	36259.7	-0.02656	0.0466016	-0.569938	0.56872	0.813061	O23254
TCONS_00001725	35956.2	-0.0433621	0.0591172	-0.733494	0.463257	0.752701	Q8WXF0
TCONS_00009626	35830.5	0.102517	0.0588509	1.74199	0.0815107	0.31234	A0A0H5QNA7
TCONS_00012569	35561.5	-0.0738355	0.0513358	-1.43829	0.150353	0.439277	Q3TUH1
TCONS_00007497	35524.8	0.29785	0.0523623	5.68825	1.28351e-08	6.43108e-07	Q22633
TCONS_00008489	35323.8	-0.0297713	0.076292	-0.390228	0.696368	0.882104	Q9FYB7
TCONS_00001690	35270.9	0.0519863	0.0669349	0.77667	0.437353	0.732292	O49453
TCONS_00009841	35221.6	-0.00642408	0.0549408	-0.116927	0.906918	0.968896	O97680
TCONS_00002214	34805	0.0324314	0.0477592	0.67906	0.4971	0.772725	P08228
TCONS_00011522	34217.5	0.00117017	0.0463767	0.0252317	0.97987	0.992228	Q9VPH7
TCONS_00011449	33939.2	0.101549	0.0489814	2.07322	0.0381519	0.197423	P02401
TCONS_00001200	33842.4	-0.0772635	0.0522737	-1.47806	0.139393	0.423462	Q59LU0
TCONS_00001570	33299.5	-0.160108	0.0576477	-2.77735	0.00548038	0.0527002	Q95KC8
TCONS_00010853	33055.3	-0.127258	0.0519833	-2.44806	0.0143628	0.10314	P34046
TCONS_00004946	33015.8	-0.1313	0.0552662	-2.37577	0.0175126	0.118481	Q01831
TCONS_00002083	32691.6	-0.0494501	0.05074	-0.974578	0.32977	0.646821	Q9VHS8
TCONS_00006262	32624.1	-0.244173	0.0493815	-4.94464	7.62849e-07	2.71852e-05	A0A0H5RE54
TCONS_00001640	32371.8	-0.118939	0.0477379	-2.49149	0.0127209	0.095319	O58762
TCONS_00010954	32329.3	0.069803	0.0616144	1.1329	0.257256	0.575763	Q7Y1W9
TCONS_00011451	32192.9	0.102133	0.0491396	2.07842	0.0376707	0.195817	P42899
TCONS_00013586	32159.6	0.0673619	0.0626354	1.07546	0.282169	0.602233	A0A0H5RCS6
TCONS_00009599	31982.3	-0.00298806	0.0485907	-0.0614946	0.950965	0.980843	A0A0H5REE8
TCONS_00000787	31805.1	-0.0627434	0.0515292	-1.21763	0.223366	0.541276	P58112
TCONS_00001101	31705	-0.0714207	0.0730623	-0.977531	0.328306	0.645255	Q9CKH9
TCONS_00006977	31583.6	-0.193663	0.0545003	-3.55342	0.000380256	0.00631926	P97313
TCONS_00012119	31306.6	-0.127104	0.049487	-2.56843	0.010216	0.0818259	Q4X195
TCONS_00012398	31210.5	0.144878	0.047114	3.07505	0.00210464	0.0252709	P02299
TCONS_00002451	31202.2	0.0476664	0.067499	0.706178	0.480077	0.764042	A0A0H5R768
TCONS_00003719	31112.2	0.105037	0.0608677	1.72566	0.0844081	0.319056	A0A0H5R7C5
TCONS_00011607	30903.5	0.00831891	0.0485697	0.171278	0.864005	0.953067	P49730
TCONS_00003586	30723.3	-0.0155155	0.0539108	-0.2878	0.7735	0.918662	Q46845
TCONS_00012197	30389.8	-0.179981	0.049836	-3.61146	0.000304474	0.00524722	F4I893
TCONS_00005705	30371	-0.0397579	0.0490998	-0.809735	0.418092	0.719268	Q9P4E9
TCONS_00003962	30329.1	0.110206	0.0657919	1.67506	0.093922	0.338322	A1CRG9
TCONS_00002280	30303.3	0.0797108	0.0466418	1.709	0.0874513	0.325573	Q4WY33
TCONS_00010682	30296.7	0.00113504	0.0475797	0.0238555	0.980968	0.992263	O30851
TCONS_00000736	30294.8	-0.0553837	0.0497496	-1.11325	0.265602	0.584148	Q6BS60
TCONS_00001308	30187.6	0.041297	0.0551133	0.749311	0.45367	0.745386	Q5RHH4
TCONS_00005709	30019.7	0.00428934	0.0609899	0.0703288	0.943932	0.979197	O43719
TCONS_00010464	29731.7	0.134556	0.0573608	2.34578	0.0189875	0.12528	P21369
TCONS_00013243	29713.6	0.113623	0.0528575	2.1496	0.0315866	0.175046	A0A0H5R9I7
TCONS_00008754	29632.9	0.0744166	0.0775811	0.959211	0.337453	0.65412	B3LFA3
TCONS_00010121	29612.7	0.0857008	0.059673	1.43618	0.150952	0.43993	A0A0H5QVX5
TCONS_00008121	29519	0.0698379	0.0489403	1.427	0.15358	0.443944	Q9SSD2
TCONS_00005399	29473.5	-0.0902744	0.0516802	-1.74679	0.0806739	0.311298	O60306
TCONS_00000921	29242.2	0.00832706	0.0699078	0.119115	0.905184	0.968896	Q27256
TCONS_00011517	28993.8	0.0649108	0.0474061	1.36925	0.170921	0.474196	Q8W0Z9
TCONS_00002494	28902	-0.165838	0.0492575	-3.36676	0.000760565	0.0109233	P35007
TCONS_00005150	28705.1	0.190342	0.0542436	3.50902	0.000449754	0.00727466	P37040
TCONS_00010321	28573.4	-0.0269283	0.0619505	-0.434675	0.663798	0.863132	A0A0H5QYG2
TCONS_00003430	28236.7	-0.0988502	0.0592552	-1.66821	0.0952739	0.340797	Q9HGP4
TCONS_00003209	28158.7	0.0179172	0.0562217	0.318688	0.749963	0.908517	Q96X45
TCONS_00001731	27775.1	-0.052906	0.0527916	-1.00217	0.316263	0.634859	Q6WKZ8
TCONS_00011430	27700.4	-0.117718	0.0542779	-2.16881	0.0300975	0.1694	Q149N8
TCONS_00013913	27315.1	0.2073	0.0642968	3.22412	0.00126362	0.0168079	P55062
TCONS_00011377	27192.7	0.245097	0.0532617	4.60176	4.18933e-06	0.000130457	Q8TGM6
TCONS_00006525	27041.1	0.118909	0.061068	1.94716	0.0515151	0.241154	Q75K28
TCONS_00009053	27038.7	0.122173	0.0512162	2.38543	0.017059	0.116357	Q29RM3
TCONS_00005883	26996.2	0.0491635	0.0498742	0.98575	0.324256	0.642534	P06709
TCONS_00003906	26498.4	-0.0981454	0.0563822	-1.74072	0.0817332	0.312729	Q7ZTM9
TCONS_00000520	26357.9	-0.00911986	0.0613086	-0.148753	0.881748	0.959499	O42249
TCONS_00000085	26208.5	0.0749565	0.0650592	1.15213	0.249269	0.567519	B9FXV5
TCONS_00008831	26100	0.143315	0.0587912	2.43769	0.0147813	0.104901	A0A0H5R868
TCONS_00002535	25805.2	-0.144786	0.0573363	-2.52521	0.0115631	0.0884851	Q94AH6
TCONS_00001710	25724	-0.122752	0.0535531	-2.29215	0.0218968	0.138444	Q8N5M1
TCONS_00004921	25716.5	0.0031212	0.0470236	0.0663752	0.947079	0.979565	P10583
TCONS_00007160	25668.4	-0.0161715	0.0738577	-0.218955	0.826685	0.940235	Q0JKD0
TCONS_00003220	25610.8	-0.0513021	0.0540445	-0.949256	0.342491	0.659641	Q8W4Q4
TCONS_00009633	25469.5	-0.136268	0.0563442	-2.4185	0.0155846	0.108409	A0A0H5RA35
TCONS_00007686	25444.5	-0.099659	0.0484564	-2.05668	0.0397174	0.202973	Q5BJ56
TCONS_00006155	25277.7	-0.0231348	0.0493826	-0.468481	0.639441	0.850206	Q6L5F5
TCONS_00002173	25262.6	-0.189047	0.049129	-3.84797	0.000119102	0.00235518	B7GM02
TCONS_00002376	25137	0.0415423	0.0654188	0.63502	0.525415	0.791164	A0A0H5QGY3
TCONS_00012255	25004.8	-0.197355	0.058083	-3.39781	0.000679286	0.010015	P19182
TCONS_00000283	24880.5	-0.0454652	0.0473683	-0.959825	0.337143	0.654047	O94432
TCONS_00005813	24830.1	0.0649704	0.0510604	1.27242	0.203223	0.518845	Q8T1C6
TCONS_00005833	24794	0.0631334	0.0513707	1.22898	0.219081	0.537341	Q5JGN1
TCONS_00004147	24726.1	-0.171289	0.0594802	-2.87977	0.0039797	0.0416338	Q553E0
TCONS_00005448	24658.1	-0.0584728	0.0488821	-1.1962	0.231618	0.548778	A0A0H5QMB5
TCONS_00003566	24596.5	-0.193724	0.0485865	-3.98719	6.68598e-05	0.00143727	P52594
TCONS_00000164	24555.1	-0.169308	0.0506858	-3.34035	0.000836724	0.0118536	A0A0H5R965
TCONS_00011860	24508.5	-0.00170921	0.0663382	-0.025765	0.979445	0.991995	Q55BF2
TCONS_00013519	24334.3	-0.0246066	0.0499074	-0.493045	0.621981	0.840235	Q9M9G6
TCONS_00006667	24222.8	-0.0662809	0.0507824	-1.30519	0.191827	0.502197	P51954
TCONS_00010039	24161.6	-0.168331	0.0505158	-3.33225	0.000861481	0.0121173	Q2KIQ2
TCONS_00005410	23986.5	-0.0166453	0.0656032	-0.253727	0.799706	0.927616	Q9ZQW8
TCONS_00006106	23952.8	0.0208247	0.0559056	0.372497	0.709523	0.888152	O61231
TCONS_00005983	23805.9	-0.0828314	0.0560035	-1.47904	0.13913	0.423362	A0A0H5QJK3
TCONS_00004338	23776.3	0.0358991	0.0524993	0.683801	0.494101	0.770741	Q6Z6L4
TCONS_00012549	23747.4	-0.0359776	0.0490263	-0.733843	0.463044	0.752701	P34736
TCONS_00013775	23646.8	-0.0255861	0.0499517	-0.512217	0.608499	0.834225	A0A0H5QJQ5
TCONS_00012340	23586.5	-0.0448438	0.0505296	-0.887476	0.374823	0.684456	P56336
TCONS_00013700	23546.9	-0.325439	0.0497581	-6.54042	6.13469e-11	4.21459e-09	Q86TG7
TCONS_00006798	23430.4	-0.0506965	0.0551104	-0.919907	0.357621	0.671321	Q86A67
TCONS_00012160	23396.3	0.0710666	0.0492047	1.44431	0.148653	0.436591	Q869K3
TCONS_00006584	23201	-0.159224	0.0581002	-2.74051	0.00613435	0.0567768	O60524
TCONS_00002575	23161	-0.00210664	0.0599224	-0.0351562	0.971955	0.990628	Q7SDU4
TCONS_00006889	22986.4	0.0119724	0.0533047	0.224602	0.822289	0.938285	Q9LMT2
TCONS_00004189	22814.7	-0.0699238	0.0596991	-1.17127	0.24149	0.559758	Q5T619
TCONS_00003884	22791.6	0.0998979	0.0669686	1.49171	0.135775	0.417922	A0A0H5R7N2
TCONS_00004711	22603.1	-0.0784805	0.0713711	-1.09961	0.271501	0.588256	A0A0H5R9X9
TCONS_00001209	22521.3	0.0365042	0.0677436	0.538857	0.589985	0.822351	A0A0H5QGR0
TCONS_00007202	22517.1	0.101282	0.0558456	1.81361	0.0697374	0.287119	A0A0H5RC71
TCONS_00010049	22441.3	0.0712561	0.0507671	1.40359	0.160442	0.455554	O14327
TCONS_00003192	22297.2	0.0552342	0.0541002	1.02096	0.307273	0.627348	O59220
TCONS_00005913	22251.5	0.0564056	0.0471106	1.1973	0.231189	0.548778	O24473
TCONS_00001208	22086.3	0.121687	0.0538452	2.25994	0.0238251	0.146198	Q9SL67
TCONS_00007680	21955.2	-0.188209	0.0662459	-2.84106	0.00449638	0.0452627	Q7TSS2
TCONS_00001976	21942.3	-0.103739	0.0789946	-1.31324	0.189102	0.498683	P27484
TCONS_00008103	21941.6	-0.0165965	0.0523851	-0.316817	0.751382	0.90912	P80313
TCONS_00008069	21656.5	0.113255	0.0487071	2.32523	0.0200598	0.13002	Q9Y259
TCONS_00003024	21411.2	-0.0771015	0.0514235	-1.49935	0.133784	0.413702	A0A0H5RLZ9
TCONS_00006218	21192.4	-0.120296	0.0489247	-2.45879	0.0139406	0.101088	Q5R7R9
TCONS_00008053	20766	0.0348794	0.0549675	0.634545	0.525725	0.791164	A0A0H5QFF3
TCONS_00000808	20760	-0.00392377	0.0497954	-0.0787979	0.937193	0.978217	Q6P963
TCONS_00002458	20358.3	-0.139112	0.0640762	-2.17103	0.0299286	0.168592	A0A0H5RCL9
TCONS_00008728	20191.4	0.0602105	0.0530207	1.1356	0.256122	0.573714	Q9UUI3
TCONS_00008675	20184.6	0.0621836	0.0513567	1.21082	0.225965	0.543755	Q6E2Z6
TCONS_00008990	20108.6	-0.0235023	0.0626855	-0.374924	0.707717	0.887789	Q8CBE3
TCONS_00011503	20096.8	-0.00708288	0.0510138	-0.138842	0.889575	0.963381	A0A0H5RPG7
TCONS_00007775	19835.7	-0.149488	0.0510431	-2.92867	0.00340421	0.0371287	Q9QXE2
TCONS_00009154	19789.6	-0.153346	0.0542212	-2.82815	0.00468176	0.0468457	Q42971
TCONS_00011036	19702.7	-0.00924312	0.0534154	-0.173042	0.862618	0.952941	P51892
TCONS_00007933	19686.4	0.159021	0.0477519	3.33016	0.000867969	0.0121772	Q9MA98
TCONS_00013990	19603.3	0.104739	0.0507845	2.06241	0.0391684	0.201092	A0A0H5QLU4
TCONS_00008631	19580.3	-0.0398203	0.0494516	-0.805238	0.420682	0.721486	O23523
TCONS_00006794	19406.4	0.00992019	0.0530824	0.186883	0.851753	0.949352	Q86UV5
TCONS_00001082	19394.6	0.013058	0.0676103	0.193137	0.846852	0.948634	Q5REG1
TCONS_00009119	19173	0.0519543	0.0519288	1.00049	0.317073	0.634903	Q8NFD2
TCONS_00004630	19171.7	0.0126604	0.0519339	0.243779	0.807402	0.931693	Q9C7E7
TCONS_00006041	19147.8	-0.0608106	0.0519265	-1.17109	0.241563	0.559758	Q8H0V6
TCONS_00007383	19134.2	0.0633217	0.0633153	1.0001	0.317261	0.634903	Q8RXF1
TCONS_00005218	19095.1	-0.0692233	0.0477454	-1.44984	0.147103	0.434532	O42586
TCONS_00000701	19076.8	0.0472526	0.0498648	0.947614	0.343326	0.66069	Q9ZR40
TCONS_00008672	19012.9	-0.10283	0.0724791	-1.41875	0.155972	0.447246	B2UJY9
TCONS_00006946	19011.1	-0.131204	0.0536797	-2.44421	0.014517	0.103577	Q9FYH7
TCONS_00002108	18965.4	-0.0617272	0.051563	-1.19712	0.231259	0.548778	P79381
TCONS_00002489	18907.4	-0.0168727	0.0559318	-0.301666	0.762907	0.913733	Q18169
TCONS_00009269	18828.2	0.043605	0.0542069	0.804419	0.421155	0.721486	A0A0H5QHB5
TCONS_00009322	18691.1	-0.0647143	0.0580414	-1.11497	0.264865	0.583247	Q7ZXT3
TCONS_00003015	18655.3	0.00817621	0.0483249	0.169193	0.865645	0.953067	F4JL11
TCONS_00009869	18649	0.15111	0.124525	1.21349	0.224943	0.542798	Q4PBZ9
TCONS_00002468	18515.4	-0.0154884	0.0550757	-0.28122	0.778542	0.919664	Q9Y2G0
TCONS_00014741	18399.8	0.0481088	0.0552368	0.870956	0.383778	0.692901	B6CZ18
TCONS_00001605	18335.2	-0.107836	0.0581477	-1.85451	0.0636659	0.275258	Q9ULG1
TCONS_00005288	18320	-0.00555231	0.0559634	-0.0992133	0.920969	0.973333	Q9WZ31
TCONS_00000977	18317.6	0.00775195	0.0575248	0.134758	0.892803	0.965001	B9DG24
TCONS_00011091	18235.4	0.0827928	0.0528926	1.5653	0.117513	0.38691	Q6NYE2
TCONS_00001025	18207.8	-0.0972022	0.0761891	-1.2758	0.202025	0.516583	Q06A37
TCONS_00003968	18176	0.0711029	0.0543041	1.30935	0.190417	0.500174	A2X6E6
TCONS_00009555	18108.9	-0.0464386	0.0648987	-0.715555	0.474266	0.760835	Q8H1D9
TCONS_00001236	18087.4	0.0840092	0.0677662	1.23969	0.215089	0.533119	Q75C39
TCONS_00002952	18009.1	-0.0961114	0.0648605	-1.48182	0.138389	0.422069	O22199
TCONS_00007100	17967.8	-0.0622878	0.0538639	-1.15639	0.247521	0.565858	Q6I5Y0
TCONS_00008038	17935.6	0.0384361	0.065041	0.590951	0.554553	0.804299	A0A0H5R994
TCONS_00000748	17909.9	-0.0227681	0.0526014	-0.432842	0.66513	0.863556	A2XW69
TCONS_00005573	17853.1	0.0550399	0.0507887	1.0837	0.278497	0.597855	Q8L4J2
TCONS_00011379	17818.2	0.0479835	0.088992	0.539189	0.589757	0.822205	A0A0H5QNL1
TCONS_00003875	17667.5	0.0776829	0.0711513	1.0918	0.274922	0.592905	Q09857
TCONS_00013759	17659.8	-0.297028	0.0504706	-5.88516	3.97658e-09	2.17213e-07	P04146
TCONS_00009151	17627.7	-0.100297	0.0526302	-1.9057	0.0566896	0.254912	A0A0H5R8G2
TCONS_00000276	17579.7	0.0727657	0.0622897	1.16818	0.242733	0.561339	Q9D7P6
TCONS_00006495	17304.5	0.148937	0.0581948	2.55928	0.0104888	0.0833103	P27464
TCONS_00006502	17297.8	0.151504	0.0584453	2.59223	0.00953569	0.0779166	P27464
TCONS_00006956	17270.8	0.0721328	0.0593703	1.21496	0.22438	0.542352	Q8RUS5
TCONS_00005335	17252	-0.091919	0.0492249	-1.86733	0.0618558	0.269481	Q8BP86
TCONS_00007609	17235.3	-0.114665	0.050116	-2.28798	0.0221384	0.139443	Q54WR5
TCONS_00010324	17169.1	-0.0721006	0.0525186	-1.37286	0.169796	0.472649	P79739
TCONS_00004416	17019.2	0.0744023	0.0647222	1.14956	0.250324	0.568822	Q55FQ0
TCONS_00009928	16972	-0.0125584	0.0532972	-0.235629	0.81372	0.934498	A0A0H5R143
TCONS_00005583	16917.4	0.0613397	0.0494899	1.23944	0.215183	0.533119	Q99J08
TCONS_00004025	16891.5	0.0343853	0.058588	0.5869	0.557271	0.806123	P52285
TCONS_00000207	16881.2	-0.21421	0.0535398	-4.00095	6.30895e-05	0.00137845	A0A0H5R965
TCONS_00002107	16867	0.0872875	0.0548897	1.59023	0.111782	0.374894	P0DKK8
TCONS_00013817	16843.9	0.00961653	0.0565389	0.170087	0.864942	0.953067	Q551C2
TCONS_00009858	16768.6	0.0486299	0.0567663	0.85667	0.391628	0.698556	A0A0H5QZN9
TCONS_00007182	16738.9	0.147993	0.0579253	2.55489	0.0106222	0.0836718	Q5PP37
TCONS_00001302	16562.5	0.0621422	0.0481815	1.28975	0.197137	0.50957	Q26636
TCONS_00001415	16455.2	-0.00598657	0.0508142	-0.117813	0.906216	0.968896	Q2T9I5
TCONS_00004555	16412.4	0.186939	0.0591724	3.15923	0.00158188	0.0203507	Q8YVH1
TCONS_00005408	16385.4	-0.173846	0.0544551	-3.19246	0.00141065	0.018505	A0A0H5RK55
TCONS_00006953	16184.4	-0.00450073	0.0656257	-0.0685819	0.945322	0.979295	F4HQD4
TCONS_00005163	16156.1	-0.0852802	0.0515703	-1.65367	0.0981947	0.346961	Q6GMC7
TCONS_00005567	16064.4	-0.0792177	0.0615959	-1.28609	0.198412	0.511071	Q9VL78
TCONS_00008026	16040.6	-0.107732	0.0596982	-1.80461	0.0711352	0.290281	A0A0H5R7Y6
TCONS_00003673	16028.3	-0.0328662	0.0500966	-0.656057	0.511787	0.783989	A0A0H5R696
TCONS_00000778	16011.7	-0.0284223	0.0490585	-0.579356	0.562349	0.809022	Q2UH00
TCONS_00006561	15943	0.0136267	0.0609627	0.223525	0.823127	0.938463	Q6T486
TCONS_00011041	15901	-0.0566834	0.0788051	-0.719285	0.471965	0.759521	D2CJS7
TCONS_00005798	15807.7	-0.0742464	0.0572927	-1.29591	0.195006	0.506489	Q55C58
TCONS_00002508	15748.5	-0.069437	0.0538261	-1.29002	0.197042	0.50957	Q93ZT6
TCONS_00000506	15730.5	0.150207	0.0566761	2.65028	0.0080426	0.0685369	Q9SMP0
TCONS_00004748	15592.5	-0.113354	0.0495936	-2.28565	0.0222749	0.139642	Q5F3X4
TCONS_00010014	15582.9	0.0787632	0.0727168	1.08315	0.278742	0.597855	A0JP85
TCONS_00003112	15497.2	0.063222	0.0517996	1.22051	0.222271	0.54059	Q9P3U1
TCONS_00001227	15492.8	0.087617	0.051974	1.68579	0.0918372	0.334794	A0JMV4
TCONS_00005409	15489.6	0.0546101	0.0558823	0.977234	0.328454	0.645255	Q9H2U2
TCONS_00009010	15478.9	0.0216408	0.0496861	0.435551	0.663163	0.86263	Q8WWF6
TCONS_00005936	15460.5	0.174446	0.0625082	2.79076	0.00525836	0.0512306	A3EWL3
TCONS_00012982	15405.5	-0.118273	0.0500632	-2.36248	0.0181533	0.121826	E6ZGB4
TCONS_00013549	15395.4	-0.0725314	0.131335	-0.552264	0.580768	0.818015	A0A0H5QXJ5
TCONS_00003310	15136.9	-0.000291478	0.0624433	-0.00466788	0.996276	0.998918	A0A0H5R6I2
TCONS_00013131	15131.3	-0.173308	0.0608093	-2.85002	0.00437167	0.0444098	Q9ZQF9
TCONS_00001959	15108.4	0.00385914	0.057414	0.067216	0.94641	0.979295	Q7KZ85
TCONS_00013080	15060.8	-0.149217	0.0484944	-3.077	0.00209096	0.0251974	Q9VTP4
TCONS_00007663	14990.1	-0.0732778	0.050069	-1.46354	0.14332	0.428902	A0A0H5QT00
TCONS_00000444	14979.2	-0.14215	0.0515024	-2.76006	0.00577903	0.0546523	O00782
TCONS_00007535	14926	0.0122123	0.0564568	0.216311	0.828745	0.941005	A0A0H5QGX1
TCONS_00012732	14905	-0.155093	0.0603282	-2.57082	0.0101459	0.0814607	A0A098DRK7
TCONS_00012038	14892.4	0.0126457	0.0494027	0.255971	0.797973	0.927235	P0C584
TCONS_00002374	14772.7	-0.0979057	0.0763272	-1.28271	0.199593	0.512954	A0A0H5RAR3
TCONS_00008557	14724.4	0.110624	0.0522275	2.11812	0.0341652	0.183873	P19515
TCONS_00005949	14671.2	-0.140002	0.0563297	-2.48541	0.0129402	0.0960519	Q75B50
TCONS_00002008	14626.1	-0.204735	0.0540647	-3.78686	0.000152566	0.00293844	A7SK48
TCONS_00004448	14624.2	0.0147561	0.0593898	0.248461	0.803777	0.929959	Q9ULR0
TCONS_00012981	14604.1	-0.132622	0.0498841	-2.6586	0.00784651	0.0674699	E6ZGB4
TCONS_00004823	14555.9	0.165434	0.0645841	2.56153	0.0104212	0.0831412	P48727
TCONS_00005112	14520.8	-0.0897274	0.0512081	-1.75221	0.0797374	0.308936	Q9XIF2
TCONS_00013538	14489.6	0.00152868	0.0501237	0.0304983	0.97567	0.990987	P61962
TCONS_00010247	14446.1	0.0279483	0.0745812	0.374737	0.707856	0.887789	A0A0H5R6K5
TCONS_00000435	14438.3	0.144948	0.0592445	2.44661	0.0144207	0.103333	Q28C44
TCONS_00010639	14411.3	-0.0012907	0.0580285	-0.0222425	0.982255	0.993284	A0A0H5QTC3
TCONS_00010306	14381.8	-0.103711	0.0531225	-1.9523	0.0509026	0.239898	Q9P6U9
TCONS_00009272	14381.1	-0.0444592	0.0498711	-0.891483	0.37267	0.682304	P25093
TCONS_00008495	14355.2	-0.01369	0.0549012	-0.249357	0.803085	0.929447	D2HSB3
TCONS_00000617	14353.2	-0.113939	0.0509403	-2.23671	0.0253055	0.150702	O48844
TCONS_00008637	14315	-0.0939338	0.0797393	-1.17801	0.238792	0.557182	Q15833
TCONS_00002621	14311.5	0.130006	0.0553862	2.34726	0.0189119	0.124976	Q6IP65
TCONS_00000062	14302.6	-0.302619	0.0628452	-4.8153	1.4698e-06	5.02296e-05	Q6ZTR5
TCONS_00006414	14298.9	0.128757	0.0707006	1.82116	0.068582	0.284754	Q5ZIP4
TCONS_00005140	14215.8	-0.237491	0.0566585	-4.19162	2.76968e-05	0.000673618	A0A0H5QTC3
TCONS_00000792	14141	-0.0876687	0.0491763	-1.78274	0.0746279	0.298333	Q54XM6
TCONS_00001634	14132.7	-0.0252888	0.055913	-0.452289	0.651061	0.856025	Q9AV81
TCONS_00005190	14088.4	-0.0035268	0.0522759	-0.0674651	0.946211	0.979295	P42698
TCONS_00002739	14040.4	-0.0814656	0.0562984	-1.44703	0.147888	0.435496	A0A0H5R625
TCONS_00010710	14029.8	0.157575	0.0571446	2.75748	0.00582492	0.054848	Q9SEE9
TCONS_00007947	14000.9	-0.0895536	0.062265	-1.43827	0.150359	0.439277	A0A0H5R484
TCONS_00004802	14000.6	0.129274	0.0708466	1.8247	0.0680468	0.284726	A0A0H5RMX0
TCONS_00004284	13987.5	0.046009	0.0535219	0.85963	0.389993	0.696865	A0A0H5R519
TCONS_00009859	13950.7	-0.0788423	0.0518585	-1.52033	0.128427	0.405632	F4ICK8
TCONS_00002705	13936.3	-0.0828404	0.0674222	-1.22868	0.219192	0.537415	Q21827
TCONS_00000073	13925.9	0.0145626	0.0548266	0.265612	0.790538	0.92371	Q9LU44
TCONS_00006342	13860.4	-0.0610079	0.0531929	-1.14692	0.251415	0.569471	A0A0H5QZ01
TCONS_00009361	13772	-0.0331507	0.0485967	-0.682159	0.495138	0.771476	Q9CS74
TCONS_00006554	13733	0.0321777	0.0691959	0.465024	0.641914	0.851626	Q9ZVD0
TCONS_00010592	13708.1	-0.0795599	0.0520964	-1.52717	0.126719	0.403468	Q63797
TCONS_00003106	13692.1	0.0132572	0.06393	0.207371	0.83572	0.944099	O44437
TCONS_00013558	13688.6	-0.0817826	0.0510648	-1.60155	0.109256	0.370338	Q5M8L0
TCONS_00009129	13622.5	-0.0145113	0.0499534	-0.290497	0.771436	0.917961	Q54QR2
TCONS_00003221	13583.5	-0.0593761	0.0618632	-0.959796	0.337158	0.654047	Q9AST1
TCONS_00000656	13516.7	-0.856465	0.0603328	-14.1957	9.74374e-46	2.70551e-43	A0A0H5QKP3
TCONS_00010186	13402	-0.0491737	0.0776143	-0.633565	0.526365	0.791164	Q8CHI8
TCONS_00011112	13352.5	-0.0978107	0.0617891	-1.58298	0.113426	0.378694	A0A0H5QGM6
TCONS_00000975	13338.7	0.0929742	0.0639027	1.45493	0.145688	0.43342	O74889
TCONS_00008498	13291	0.0704494	0.0635546	1.10849	0.267652	0.585008	A0A0H5R868
TCONS_00004203	13222.5	0.159699	0.0641046	2.49123	0.0127302	0.095319	O89038
TCONS_00010486	13054.2	-0.474222	0.0510915	-9.28181	1.66624e-20	2.3133e-18	Q6C764
TCONS_00005136	13035.7	0.0396586	0.0549395	0.721861	0.47038	0.758068	Q5R9B0
TCONS_00006607	13015.1	0.0660905	0.0727465	0.908505	0.363612	0.675281	Q6EQG2
TCONS_00007568	13013.1	-0.0191133	0.065832	-0.290335	0.77156	0.917961	F4JLS1
TCONS_00007511	13002.2	0.0355537	0.0527466	0.674047	0.500281	0.774419	O94477
TCONS_00004089	12957.1	-0.0256418	0.0552964	-0.463717	0.642851	0.85202	Q5JSH3
TCONS_00010242	12857	-0.00481511	0.0656876	-0.0733031	0.941565	0.979086	Q08773
TCONS_00011973	12824.7	0.0529294	0.0595526	0.888783	0.37412	0.684188	P23475
TCONS_00003649	12822.6	0.248947	0.0589205	4.22513	2.38801e-05	0.000598259	Q8S9J0
TCONS_00009212	12749.4	0.130379	0.0660387	1.97429	0.0483492	0.23314	A0A0H5RKW0
TCONS_00000710	12746.1	-0.0386605	0.0511241	-0.75621	0.449523	0.742226	P46086
TCONS_00007145	12725.6	0.0695663	0.0569837	1.22081	0.222158	0.54059	Q54J75
TCONS_00008543	12712.5	0.13227	0.0495505	2.66941	0.00759857	0.0659334	Q69S81
TCONS_00007319	12674.3	-0.0860611	0.058202	-1.47866	0.13923	0.423462	Q9SL02
TCONS_00001675	12670.8	0.130929	0.0528814	2.47591	0.0132899	0.0977525	Q9VLT5
TCONS_00001481	12603.3	0.119707	0.0532386	2.24851	0.024544	0.148398	Q869Y7
TCONS_00001713	12561.5	0.0654701	0.0532612	1.22923	0.218986	0.537307	Q9JJL8
TCONS_00002044	12537.8	-0.166835	0.0617175	-2.70321	0.00686735	0.0611819	P10978
TCONS_00014660	12463	-0.47144	0.0629395	-7.49036	6.86873e-14	6.2703e-12	A0A0H5QHB2
TCONS_00007274	12452.5	0.0528377	0.0723213	0.730597	0.465025	0.754181	Q54MZ4
TCONS_00008396	12380.7	0.00796515	0.0536711	0.148407	0.882022	0.959577	Q2HJ10
TCONS_00004554	12285.9	0.0402699	0.0525385	0.766484	0.443388	0.73776	A0A0H5R7K5
TCONS_00001414	12277.8	-0.00608506	0.0508697	-0.11962	0.904784	0.968896	P0C599
TCONS_00010150	12277.6	0.192973	0.0624655	3.08928	0.00200641	0.0243991	Q54XK2
TCONS_00009144	12270.1	-0.178614	0.0605282	-2.95092	0.00316826	0.0351889	Q13233
TCONS_00012562	12254	-0.0367986	0.0625803	-0.588022	0.556518	0.805699	Q9LXC0
TCONS_00012611	12247.3	-0.146659	0.0709292	-2.06768	0.0386706	0.199459	A0A0H5QUJ7
TCONS_00001867	12239	-0.0870995	0.0539387	-1.61479	0.106357	0.364028	Q05045
TCONS_00000976	12232.7	-0.205427	0.0564249	-3.64072	0.000271878	0.00483146	Q9ZT71
TCONS_00014510	12187.3	0.0151824	0.0758232	0.200234	0.841298	0.946568	A0A0H5QZB3
TCONS_00010402	12139.9	0.0303757	0.0558406	0.543971	0.586461	0.820467	A0A0H5R8B7
TCONS_00000768	12137.9	-0.0369082	0.0515281	-0.716273	0.473823	0.760623	Q28717
TCONS_00010426	12115.6	0.0240393	0.0516642	0.465299	0.641718	0.851572	Q54QA0
TCONS_00005395	12077.9	-0.161415	0.0526319	-3.06687	0.00216312	0.0258334	P11718
TCONS_00004412	12076.1	-0.053539	0.0547123	-0.978556	0.327799	0.645255	Q9UC07
TCONS_00001891	12053	0.129673	0.0705111	1.83905	0.0659082	0.279543	P49452
TCONS_00005267	12033.4	-0.00985094	0.0496714	-0.198322	0.842793	0.946616	Q5R5H4
TCONS_00013360	12024.6	-0.197228	0.0557089	-3.54032	0.000399638	0.0066084	Q9C5C4
TCONS_00001146	12014.9	0.0540285	0.0593246	0.910726	0.36244	0.674853	Q9HAU5
TCONS_00011688	11996.6	0.0696125	0.0497057	1.40049	0.161366	0.457008	Q8HXW8
TCONS_00008584	11916.4	0.0132832	0.0600635	0.221153	0.824974	0.939718	Q8L7M4
TCONS_00007340	11885.8	-0.145166	0.054941	-2.64221	0.00823672	0.0699229	A0A1D6N272
TCONS_00005403	11836.5	-0.171475	0.0523636	-3.27469	0.00105778	0.0144153	P11718
TCONS_00009996	11791.1	-0.147171	0.0614431	-2.39523	0.0166097	0.113759	P02362
TCONS_00006323	11778.7	-0.0816585	0.0494664	-1.65079	0.0987823	0.348483	O00505
TCONS_00002613	11727.3	0.0252655	0.0536486	0.470944	0.637681	0.849391	B6IS04
TCONS_00000230	11720.4	0.155937	0.0697073	2.23702	0.0252851	0.150702	Q9FPJ4
TCONS_00006534	11697.3	0.0531838	0.0604536	0.879747	0.378997	0.688559	Q7ZXA8
TCONS_00000470	11630.2	0.0938309	0.063918	1.46799	0.142107	0.427155	Q7SEY9
TCONS_00006141	11589.8	0.0828374	0.0544319	1.52185	0.128046	0.405189	A0A0H5QZZ9
TCONS_00002863	11577.5	-0.00869099	0.0651134	-0.133475	0.893818	0.965381	O15294
TCONS_00006247	11570.1	0.125345	0.0601092	2.08528	0.0370438	0.193615	A0A0H5RB26
TCONS_00004365	11548.7	-0.0470476	0.0682956	-0.688882	0.490897	0.76997	A0A0H5RHH4
TCONS_00002686	11531.9	-0.112991	0.0518159	-2.18063	0.0292109	0.165885	Q16222
TCONS_00002049	11483.3	0.195255	0.05635	3.46504	0.000530152	0.00821612	A0A0H5RDH8
TCONS_00009711	11468.2	-0.0166497	0.0504529	-0.330004	0.741397	0.904057	A0A0H5RJR8
TCONS_00013006	11464.2	0.0983428	0.0608956	1.61494	0.106323	0.364028	Q54KF1
TCONS_00001137	11453.9	0.141464	0.0590119	2.39721	0.0165205	0.113497	A0A0H5QXR3
TCONS_00008781	11446.2	-0.0734442	0.0549487	-1.3366	0.181355	0.488879	A0A0H5R947
TCONS_00014261	11423.2	0.0460728	0.0531842	0.866287	0.386333	0.694743	Q54C49
TCONS_00009328	11400.1	0.0510153	0.0532267	0.958454	0.337834	0.65412	Q8BHA0
TCONS_00001557	11359.5	-0.00926037	0.0565466	-0.163765	0.869916	0.954241	Q9VMP9
TCONS_00005273	11355.6	-0.00592581	0.0640909	-0.0924595	0.926333	0.974135	F4JI46
TCONS_00011070	11353.3	-0.0310929	0.0625329	-0.497225	0.619031	0.8388	G0SBQ3
TCONS_00009671	11349.7	0.141197	0.0613245	2.30246	0.0213095	0.135762	Q06190
TCONS_00011113	11344.1	0.0478828	0.0529672	0.904007	0.365992	0.677061	Q4WKB9
TCONS_00011034	11328.9	-0.0700089	0.0713449	-0.981274	0.326458	0.644909	O13833
TCONS_00011822	11317.1	0.25228	0.0599953	4.205	2.61087e-05	0.000642023	P42730
TCONS_00005531	11282.5	0.193549	0.0678463	2.85275	0.00433429	0.0441569	Q9C5J3
TCONS_00002632	11280.9	0.166535	0.0527598	3.15647	0.0015969	0.0205043	P49020
TCONS_00001400	11251.3	-0.0107887	0.0504533	-0.213835	0.830676	0.941112	Q9D9D8
TCONS_00011901	11216.6	-0.0444062	0.0512384	-0.866658	0.386129	0.694743	A0A0H5RQ62
TCONS_00002253	11168.1	0.0604785	0.056502	1.07038	0.28445	0.605421	Q5TYQ8
TCONS_00002623	11163.8	0.0529996	0.0516082	1.02696	0.304439	0.624361	O21272
TCONS_00002650	11132.3	0.00958326	0.0499122	0.192002	0.84774	0.948831	A0A0H5R9U7
TCONS_00011466	11128.4	-0.307409	0.0528408	-5.81764	5.96838e-09	3.18186e-07	A0A0H5QRB4
TCONS_00006224	11108.3	0.0391317	0.0639836	0.61159	0.540809	0.799812	A0A0H5R439
TCONS_00004275	11101.9	-0.11765	0.0555685	-2.11721	0.0342416	0.183873	A0A0H5QME1
TCONS_00012814	11057.8	-0.0899751	0.0530733	-1.6953	0.0900191	0.331246	P46293
TCONS_00009920	11049.4	-0.0883203	0.0670595	-1.31704	0.187824	0.497783	O96005
TCONS_00009650	11028.9	-0.262329	0.052443	-5.00217	5.66876e-07	2.0987e-05	P72699
TCONS_00010624	11026.2	-0.256984	0.0706219	-3.63887	0.000273832	0.00485323	P41891
TCONS_00002904	11005.2	-0.0269617	0.0689625	-0.390962	0.695826	0.882104	O75175
TCONS_00005614	10983.9	0.0710311	0.055372	1.2828	0.199563	0.512954	A0A0H5RAZ7
TCONS_00002387	10974	-0.0800463	0.0502477	-1.59304	0.111152	0.3741	A0A0H5R408
TCONS_00005053	10965.9	0.0702712	0.051719	1.35871	0.174238	0.480001	A0A0H5QXZ9
TCONS_00011664	10944.8	0.177193	0.0506081	3.50129	0.000463019	0.00739942	A2A288
TCONS_00003772	10943	0.195077	0.0681927	2.86067	0.00422744	0.0432744	Q556J2
TCONS_00005378	10839.8	0.0746278	0.056265	1.32636	0.18472	0.492467	Q9MAU3
TCONS_00000089	10785.2	0.00291099	0.0605302	0.0480915	0.961643	0.986102	Q8ST87
TCONS_00006249	10779.9	0.12042	0.0518744	2.32137	0.0202668	0.131124	Q54ED3
TCONS_00011152	10759.9	0.00416505	0.0568359	0.0732821	0.941582	0.979086	P61020
TCONS_00014560	10668.4	-0.0492689	0.0619428	-0.795394	0.426384	0.724861	P10401
TCONS_00004349	10654.9	-0.175125	0.0544927	-3.21373	0.00131022	0.0173239	Q23868
TCONS_00006733	10648.9	-0.181421	0.0543076	-3.34062	0.000835923	0.0118536	O75643
TCONS_00010955	10615.9	-0.19017	0.0634722	-2.99612	0.00273439	0.0310955	A0A0H5QXA9
TCONS_00001895	10588	0.0128906	0.0571257	0.225654	0.82147	0.938019	A0A0H5R525
TCONS_00001808	10587.9	0.0729548	0.0573803	1.27142	0.203578	0.518845	Q6K3T2
TCONS_00005100	10522.1	0.0323512	0.0519604	0.622612	0.53354	0.794527	Q2KI83
TCONS_00013289	10516.6	0.153165	0.0876767	1.74693	0.0806491	0.311298	Q5BP74
TCONS_00007731	10494.6	0.0963069	0.0707726	1.36079	0.173579	0.478779	Q55A45
TCONS_00009150	10491.9	0.046562	0.0534587	0.87099	0.383759	0.692901	P35290
TCONS_00001243	10481.4	-0.132667	0.13103	-1.01249	0.311302	0.631127	O61363
TCONS_00010152	10472.6	-0.110726	0.0562716	-1.96771	0.0491018	0.234394	Q9FIK7
TCONS_00012177	10472.2	0.10577	0.0497671	2.1253	0.0335618	0.182593	P48724
TCONS_00006238	10466.6	0.010097	0.0609279	0.16572	0.868377	0.953872	Q6GR45
TCONS_00004525	10454.8	0.0599685	0.0546856	1.0966	0.272814	0.589697	Q9C8L4
TCONS_00004770	10431.8	0.0343415	0.124108	0.276706	0.782006	0.92037	P49030
TCONS_00000766	10413.5	0.113707	0.0582964	1.95049	0.051118	0.240617	O14369
TCONS_00010688	10404	-0.00220087	0.0640789	-0.0343462	0.972601	0.990628	P34727
TCONS_00002864	10397.6	0.235824	0.0528564	4.4616	8.13496e-06	0.000240896	P55857
TCONS_00005328	10383.3	0.199739	0.0566974	3.52289	0.000426864	0.00700386	Q6EU39
TCONS_00011789	10368.3	0.0178625	0.0749268	0.2384	0.811571	0.933916	Q5UPG6
TCONS_00012949	10330	0.175357	0.0599679	2.92419	0.00345356	0.037483	A0A0H5R7V7
TCONS_00006774	10305.9	0.150387	0.0720636	2.08687	0.0369	0.193615	A0A0H5RA98
TCONS_00002658	10296.2	0.122863	0.0840798	1.46126	0.143944	0.429575	A0A0H5QYP7
TCONS_00007739	10274.6	-0.10477	0.0505418	-2.07293	0.0381786	0.197423	A2YGP6
TCONS_00004610	10268.6	0.0843501	0.0546732	1.5428	0.122878	0.397313	A0A0H5REP8
TCONS_00006239	10267.2	0.0373207	0.05287	0.705895	0.480253	0.764042	A0A0H5R7K5
TCONS_00008276	10215.8	0.0619939	0.0677132	0.915536	0.35991	0.672491	Q54DH8
TCONS_00007229	10213.8	-0.0248665	0.0543205	-0.457773	0.647115	0.853767	Q56JZ5
TCONS_00000655	10199	0.247033	0.0633498	3.89951	9.63893e-05	0.00197036	O43497
TCONS_00014361	10198.4	0.226583	0.0553454	4.09398	4.24037e-05	0.000992393	A0A0H5RFH3
TCONS_00004088	10193	0.120013	0.0562302	2.13432	0.0328168	0.179845	Q555V7
TCONS_00011831	10175.9	0.00019849	0.0521068	0.00380929	0.996961	0.998918	Q54UH8
TCONS_00001265	10162.6	-0.133896	0.13213	-1.01337	0.310885	0.631127	O61363
TCONS_00009456	10151	0.119348	0.054634	2.1845	0.0289256	0.164612	Q8LPQ5
TCONS_00012117	10136.6	0.207736	0.0538748	3.8559	0.000115304	0.00228687	A0A0H5R5Q5
TCONS_00005108	10101.2	0.065276	0.0519968	1.25538	0.209339	0.527495	Q6P963
TCONS_00012114	10097.7	0.212306	0.0542264	3.91518	9.03361e-05	0.00187539	Q655R6
TCONS_00001287	10044.8	0.214773	0.0639692	3.35745	0.00078664	0.0112493	Q9C776
TCONS_00009356	10026.8	-0.0715959	0.0538819	-1.32876	0.183929	0.49187	Q28EW0
TCONS_00009414	10023.3	0.0735126	0.069685	1.05493	0.291459	0.612925	Q6NPP4
TCONS_00014680	9997.21	-0.0489899	0.0891792	-0.549341	0.582771	0.818804	A0A0H5R2J5
TCONS_00003844	9966	0.104563	0.0660437	1.58324	0.113366	0.378683	Q09929
TCONS_00011701	9915.04	-0.0476079	0.0741107	-0.64239	0.52062	0.788575	O89114
TCONS_00007168	9899.83	0.183879	0.0566131	3.24799	0.00116223	0.0155837	A0A0H5QQJ8
TCONS_00006432	9877.17	-0.0438901	0.0611542	-0.717696	0.472945	0.760262	Q95ZG4
TCONS_00003913	9860.78	-0.12631	0.0632613	-1.99665	0.0458635	0.224896	P05455
TCONS_00004849	9846.88	-0.0494094	0.0579275	-0.852951	0.393686	0.700728	Q869R1
TCONS_00004111	9842.49	-0.174549	0.0584729	-2.98513	0.00283459	0.0320164	Q5REU4
TCONS_00003038	9833.21	0.0482066	0.0556339	0.866496	0.386218	0.694743	O02195
TCONS_00005154	9819.06	0.205331	0.0569534	3.60524	0.000311866	0.00535639	Q9ZNT7
TCONS_00008987	9804.6	0.0865043	0.0605907	1.42768	0.153383	0.44364	B9DFV2
TCONS_00010707	9776.52	0.100281	0.0581868	1.72343	0.0848102	0.320361	Q8RX28
TCONS_00010375	9762.96	-0.121201	0.0647495	-1.87185	0.0612279	0.26755	Q9LV21
TCONS_00005262	9752.41	0.0585206	0.0728339	0.803481	0.421697	0.721486	P0CT83
TCONS_00003102	9712.68	0.165481	0.0569878	2.90379	0.00368672	0.0395141	A0A0H5R1L5
TCONS_00005407	9692.52	-0.54052	0.0573138	-9.43089	4.0664e-21	6.02189e-19	P12522
TCONS_00000217	9685.78	0.215021	0.0589118	3.64988	0.000262364	0.0047216	A0A0H5RBS0
TCONS_00008079	9679.07	0.099233	0.0666711	1.4884	0.136646	0.419057	Q5XIA8
TCONS_00007049	9673.12	0.128046	0.057022	2.24555	0.0247331	0.149024	Q9BQ70
TCONS_00010472	9670.71	-0.151452	0.0543029	-2.78903	0.00528668	0.0513563	Q09891
TCONS_00012550	9669.03	0.0882272	0.0551827	1.59882	0.109861	0.371442	A0A0H5RRH3
TCONS_00009691	9648.14	-0.0352659	0.0581543	-0.60642	0.544236	0.800939	Q6P878
TCONS_00006112	9631.74	-0.0567945	0.0553361	-1.02635	0.304725	0.624442	A0A0H5R6W1
TCONS_00007593	9617.23	-0.144867	0.0598109	-2.42208	0.015432	0.107684	A0A0H5QK94
TCONS_00000523	9596.89	0.112441	0.0556084	2.02202	0.0431743	0.215683	F4HR03
TCONS_00007203	9574.97	-0.181688	0.0535214	-3.39468	0.000687096	0.0100855	Q99JB2
TCONS_00010943	9559.51	-0.0387353	0.0773708	-0.500645	0.616621	0.837976	Q9U7D0
TCONS_00002456	9511.19	-0.161167	0.060678	-2.6561	0.00790501	0.0677979	A0A0H5R8H9
TCONS_00002577	9496.72	-0.0118107	0.0825413	-0.143088	0.88622	0.961696	Q3ZYR8
TCONS_00001003	9482.87	-0.176651	0.0571294	-3.09212	0.00198733	0.0242113	P0CM31
TCONS_00013435	9461.66	-0.0178931	0.0544287	-0.328744	0.74235	0.904887	Q566M1
TCONS_00001176	9445.47	0.0317337	0.0863026	0.367703	0.713095	0.888901	Q8KTR9
TCONS_00001301	9440.54	0.00724624	0.0808766	0.0895962	0.928608	0.975083	A0A0H5R8S2
TCONS_00004657	9435.06	0.00844908	0.0648858	0.130215	0.896397	0.96597	A0A0H5R7U2
TCONS_00004814	9425.41	-0.00915022	0.0540824	-0.16919	0.865647	0.953067	Q767K6
TCONS_00010773	9413.1	-0.16661	0.0533617	-3.12228	0.00179455	0.0224369	Q9LV09
TCONS_00012860	9406.1	0.17009	0.058803	2.89254	0.00382146	0.0404225	A0A0H5QK90
TCONS_00012020	9396.99	-0.0707956	0.0540289	-1.31033	0.190085	0.499891	A7RWP6
TCONS_00000978	9393.5	-0.136278	0.053623	-2.5414	0.0110409	0.0858414	Q96HR8
TCONS_00000412	9392.25	-0.0660522	0.0681647	-0.969008	0.332541	0.649431	Q3SZK1
TCONS_00009402	9380.71	0.00735764	0.0578626	0.127157	0.898816	0.966862	F4J0A8
TCONS_00010578	9380.04	0.317718	0.072981	4.35343	1.34024e-05	0.000355831	F4IZC4
TCONS_00011305	9374.6	0.0238978	0.0571749	0.417977	0.675964	0.870447	A0A0H5RQA9
TCONS_00010370	9354.6	-0.030736	0.0598642	-0.513429	0.607651	0.833907	Q13356
TCONS_00003273	9350.08	0.0165463	0.0560441	0.295237	0.767813	0.915627	O13615
TCONS_00000677	9316.78	0.0991799	0.054099	1.83331	0.0667572	0.282099	Q7SC98
TCONS_00003976	9313.49	0.0797742	0.0657528	1.21324	0.225036	0.542798	A0A0H5RED4
TCONS_00001164	9295.59	-0.0268687	0.050065	-0.536678	0.59149	0.82354	P12613
TCONS_00007906	9291.68	0.0775218	0.0652254	1.18852	0.234628	0.552885	Q92794
TCONS_00011210	9280.69	-0.957011	0.0671687	-14.2479	4.62189e-46	1.33914e-43	A0A0H5RED2
TCONS_00008870	9274.83	-0.0603587	0.0609402	-0.990458	0.32195	0.640792	Q14974
TCONS_00006205	9271.97	-0.0935183	0.0689685	-1.35596	0.175113	0.481051	O15347
TCONS_00014161	9254.19	0.018157	0.061218	0.296596	0.766775	0.915627	A0A0H5QKM5
TCONS_00009539	9209.96	0.0409313	0.0520819	0.785903	0.431924	0.728882	P40825
TCONS_00007449	9206.3	-0.0501711	0.0574162	-0.873815	0.382219	0.691738	P21734
TCONS_00008034	9204.45	-0.00802456	0.0637821	-0.125812	0.899881	0.967729	Q10233
TCONS_00001843	9171.33	0.0563769	0.0613665	0.918691	0.358257	0.671946	Q9ULC5
TCONS_00010537	9168.67	-0.0468096	0.0587552	-0.796689	0.425632	0.724861	Q6IMT1
TCONS_00007023	9147.29	0.09491	0.058765	1.61508	0.106294	0.364028	Q3KQD1
TCONS_00012409	9144.98	-0.105321	0.0728356	-1.44602	0.148173	0.435756	Q9FLY5
TCONS_00001280	9120.37	0.112029	0.0673744	1.66279	0.0963553	0.342419	A0A0H5QHF9
TCONS_00011213	9074.51	-0.911297	0.0635798	-14.3331	1.35842e-46	4.11478e-44	A0A0H5RED2
TCONS_00005950	9066.27	-0.108103	0.0640147	-1.68872	0.0912738	0.3334	P10078
TCONS_00001088	9047.4	-0.0674443	0.0601483	-1.1213	0.26216	0.58099	Q8RXN6
TCONS_00005642	9045.5	0.0275968	0.0606148	0.455281	0.648907	0.854439	A0A0H5R4Q6
TCONS_00004545	9038.04	0.0154329	0.0522369	0.295441	0.767657	0.915627	Q96LU5
TCONS_00007370	9018.28	0.279023	0.0693977	4.02064	5.80391e-05	0.00128924	O08759
TCONS_00011976	9009.27	-0.0315692	0.0519178	-0.608061	0.543147	0.80074	A0A0H5R491
TCONS_00004907	9006.37	0.0621205	0.0537789	1.15511	0.248046	0.566451	Q652V8
TCONS_00012893	8990.42	0.0217966	0.0594578	0.36659	0.713925	0.889436	Q550A8
TCONS_00001509	8980.47	-0.00853937	0.055364	-0.154241	0.87742	0.956977	Q3KRD5
TCONS_00008340	8973.46	0.0674976	0.05209	1.29579	0.195049	0.506489	Q28ID3
TCONS_00011681	8921.23	0.135544	0.0796876	1.70095	0.0889526	0.329052	Q5DU02
TCONS_00011277	8843.43	0.0144613	0.0513124	0.281828	0.778075	0.919664	Q80UG8
TCONS_00009315	8824.92	0.0220557	0.0575234	0.383422	0.701407	0.884089	Q9JIH7
TCONS_00013469	8816.66	-0.102654	0.053139	-1.93181	0.0533836	0.245344	Q5M9Q1
TCONS_00003680	8816.22	0.0939562	0.0533905	1.75979	0.078443	0.307247	Q9LF41
TCONS_00011851	8791.32	-0.125376	0.0521788	-2.40282	0.0162693	0.112119	Q7T0X5
TCONS_00013379	8779.49	-0.114759	0.053791	-2.13342	0.0328906	0.180101	A0A0H5QRR4
TCONS_00006464	8772.22	0.0872487	0.0539344	1.61768	0.105731	0.363379	Q9DD48
TCONS_00012628	8771.22	0.0848548	0.0667339	1.27154	0.203537	0.518845	A0A0H5R5H2
TCONS_00010749	8753.93	-0.020949	0.0543518	-0.385433	0.699917	0.883858	Q6NLV4
TCONS_00000730	8699.59	0.113331	0.0693623	1.6339	0.102281	0.356052	F4IZR5
TCONS_00003496	8689.35	0.0997352	0.0672881	1.48221	0.138284	0.422069	G3X9K3
TCONS_00012384	8674.18	-0.0778505	0.0577119	-1.34895	0.177353	0.484365	Q6Q1P4
TCONS_00001443	8672.34	0.0233421	0.0640439	0.364471	0.715506	0.889498	Q9C909
TCONS_00010050	8665.66	-0.141507	0.052737	-2.68327	0.0072907	0.0637601	Q8TF05
TCONS_00004219	8664.28	0.150458	0.0678983	2.21593	0.026696	0.156055	A0A0H5RE21
TCONS_00003775	8664.09	-0.103	0.0632927	-1.62736	0.103662	0.3583	Q8T7K0
TCONS_00003524	8657.83	0.0421305	0.0571616	0.737042	0.461097	0.75218	B0WAU6
TCONS_00004883	8636.83	-0.0393898	0.0591564	-0.665859	0.505501	0.778426	Q9C5Z1
TCONS_00001261	8622.95	0.18958	0.0696404	2.72227	0.00648349	0.0588806	Q55DB6
TCONS_00007073	8606.56	0.0935778	0.0714937	1.30889	0.19057	0.500378	A0A0H5QMU1
TCONS_00000377	8605.89	-0.00577427	0.134355	-0.0429777	0.965719	0.987529	Q75B82
TCONS_00003400	8589.4	-0.0482313	0.0672107	-0.717612	0.472996	0.760262	A0A0H5R7K5
TCONS_00003389	8569.18	0.102001	0.058196	1.75271	0.0796526	0.308936	Q9CWG8
TCONS_00005266	8555.56	0.158881	0.0574955	2.76336	0.00572088	0.0542955	Q8R5L3
TCONS_00003185	8552.91	0.149773	0.0539113	2.77814	0.00546707	0.0526482	Q8L4N1
TCONS_00004223	8543.41	-0.20621	0.0711887	-2.89667	0.00377141	0.0399565	Q5XJQ5
TCONS_00007608	8518.75	-0.108123	0.0510211	-2.11917	0.0340757	0.183873	A0A0H5RAT3
TCONS_00002501	8499.48	0.0126839	0.0521858	0.243053	0.807965	0.931707	Q9PP15
TCONS_00001830	8489.06	-0.120587	0.0546368	-2.20707	0.0273094	0.157703	A0A0H5QHC2
TCONS_00005627	8481.21	0.0206695	0.0524616	0.393992	0.693587	0.881715	Q2QS13
TCONS_00003201	8474.36	0.124594	0.0587247	2.12167	0.0338656	0.183629	Q54NL4
TCONS_00008386	8471.77	0.0542213	0.0712129	0.761398	0.44642	0.739538	Q704U0
TCONS_00012708	8468.61	-0.0493969	0.0719088	-0.686937	0.492122	0.77038	Q9M2S7
TCONS_00011993	8435.95	0.0283146	0.05239	0.540458	0.588881	0.821844	A0A0H5R5M6
TCONS_00005423	8421.69	0.233121	0.0803936	2.89975	0.00373463	0.0396931	A0A0H5R6J8
TCONS_00000475	8419.79	-0.214465	0.058499	-3.66614	0.000246243	0.00450815	Q3SZK1
TCONS_00011190	8414.25	0.0477709	0.0551299	0.866515	0.386208	0.694743	Q9SVA6
TCONS_00009953	8412.96	0.127562	0.0580729	2.19658	0.0280504	0.160867	Q10P01
TCONS_00013781	8399.64	0.242199	0.0567183	4.27021	1.95291e-05	0.000502479	A0A0H5QHY2
TCONS_00006254	8377.76	0.00029834	0.0774819	0.00385044	0.996928	0.998918	Q5A310
TCONS_00003094	8355.76	0.0534672	0.0588543	0.908468	0.363631	0.675281	P59232
TCONS_00005299	8354.37	0.0267712	0.0681149	0.39303	0.694297	0.881715	G3V8Y7
TCONS_00003017	8345.17	-0.0841649	0.0543787	-1.54775	0.121681	0.394591	A0A0H5QUS8
TCONS_00004464	8298.38	-0.13759	0.0583298	-2.35883	0.0183326	0.122348	Q9FUT3
TCONS_00001289	8279.9	0.00828099	0.0554437	0.149358	0.881271	0.959266	Q803I2
TCONS_00007448	8262.3	0.0140117	0.0613807	0.228275	0.819432	0.936705	Q53GS9
TCONS_00005340	8256.25	0.207828	0.0537909	3.86362	0.000111719	0.00222902	A0A0H5QJV0
TCONS_00001177	8248.15	0.0110243	0.0510398	0.215995	0.828992	0.941053	Q0IZS0
TCONS_00009325	8242.54	0.099991	0.0534264	1.87157	0.0612667	0.26755	Q6NZY4
TCONS_00010709	8242.45	0.0983335	0.0568824	1.72872	0.0838601	0.317525	P42867
TCONS_00006487	8224.86	0.124744	0.0588995	2.1179	0.0341831	0.183873	P37278
TCONS_00000829	8202.29	-0.0823841	0.0570616	-1.44377	0.148802	0.436837	Q2TBV1
TCONS_00007888	8199.38	0.0830467	0.0536762	1.54718	0.12182	0.394849	P38666
TCONS_00001863	8197.37	-0.0400789	0.0711049	-0.563659	0.572987	0.814349	Q9N1T2
TCONS_00003883	8152.52	0.0319535	0.0591226	0.540462	0.588878	0.821844	Q6NW58
TCONS_00005007	8151.85	0.0798511	0.0642858	1.24213	0.21419	0.533119	Q65XV7
TCONS_00001766	8149.42	0.104814	0.0524413	1.99869	0.045642	0.224471	Q3SZ19
TCONS_00001777	8133.29	0.194894	0.0695683	2.80148	0.00508685	0.0499245	A0A0H5R6Y3
TCONS_00002389	8130.96	-0.05907	0.0566252	-1.04317	0.296867	0.618342	Q5SWU9
TCONS_00002645	8096.99	0.0271934	0.0535532	0.507783	0.611606	0.836198	Q0IHF9
TCONS_00012493	8089.7	-0.124864	0.0580306	-2.15169	0.0314214	0.174708	P05369
TCONS_00001577	8084.54	-0.0366267	0.0649929	-0.563548	0.573062	0.814349	A0A0H5QYU0
TCONS_00009612	8064.07	-0.00693426	0.0828532	-0.0836934	0.9333	0.976606	Q28XK6
TCONS_00009977	8052.72	-0.0526231	0.0569874	-0.923417	0.35579	0.670149	O31752
TCONS_00005415	8043	-0.187773	0.0553741	-3.39099	0.000696417	0.0101775	Q9EQ00
TCONS_00003792	8039.75	0.150158	0.0564738	2.65889	0.00783988	0.0674699	F4K4E3
TCONS_00006055	8007.99	0.0579284	0.0627244	0.923538	0.355727	0.670149	Q9FH40
TCONS_00006789	8001.24	-0.0679003	0.0647756	-1.04824	0.294528	0.615977	Q962X7
TCONS_00010081	7998.79	-0.00391321	0.0608844	-0.0642728	0.948753	0.980298	F4JMJ1
TCONS_00004085	7979.23	0.0748541	0.0552728	1.35427	0.175651	0.481901	A0A0H5R925
TCONS_00001267	7975.44	0.128716	0.0571861	2.25082	0.024397	0.148071	A0A0H5R597
TCONS_00000805	7960.69	0.176292	0.0696276	2.53192	0.011344	0.0872937	Q9JI39
TCONS_00006883	7948.51	0.0581917	0.0526348	1.10557	0.268911	0.586394	Q94K01
TCONS_00005526	7948	0.161125	0.0554901	2.90367	0.00368814	0.0395141	Q9FHE1
TCONS_00008007	7923.94	0.0206297	0.0621283	0.332051	0.739851	0.903494	Q9JJN0
TCONS_00007453	7901.94	0.0980857	0.0605315	1.62041	0.105145	0.361737	A0A0H5RKH1
TCONS_00009565	7890.87	0.156246	0.0587411	2.65991	0.00781613	0.0673825	Q54271
TCONS_00001753	7885.17	0.0628479	0.0529833	1.18618	0.235549	0.554188	Q9FMA3
TCONS_00008479	7865.44	0.0693357	0.0580527	1.19436	0.232338	0.549823	Q60809
TCONS_00000516	7857.17	-0.584457	0.0660936	-8.84288	9.32853e-19	1.15121e-16	P82198
TCONS_00010829	7855.77	0.0206623	0.0571044	0.361835	0.717476	0.890199	Q555C8
TCONS_00001774	7843.36	0.155593	0.064575	2.4095	0.0159744	0.110429	Q9ATY5
TCONS_00005294	7819.04	0.104829	0.0643812	1.62825	0.103471	0.358011	Q5R5Q2
TCONS_00010052	7815.19	0.248021	0.0632123	3.92361	8.72317e-05	0.0018223	Q6P7L4
TCONS_00000233	7802.62	0.00428648	0.0564589	0.0759221	0.939481	0.978999	Q9M041
TCONS_00000668	7794.17	-0.0831204	0.0598466	-1.38889	0.164866	0.463573	P47160
TCONS_00005476	7768.25	0.106463	0.063006	1.68973	0.0910804	0.3334	A0A0H5R3W0
TCONS_00003271	7752.56	0.249444	0.0711776	3.50453	0.000457418	0.00734514	Q9ATB4
TCONS_00005927	7741.2	-0.0846423	0.133531	-0.63388	0.526159	0.791164	Q9BZJ0
TCONS_00014295	7740.45	-0.103745	0.0715562	-1.44984	0.147104	0.434532	A0A0H5QJR2
TCONS_00004045	7739.89	0.09145	0.0610684	1.4975	0.134263	0.414225	Q6BJD8
TCONS_00006421	7723.68	0.0961402	0.0565066	1.7014	0.0888686	0.329011	Q9CV28
TCONS_00014071	7710.72	0.0985163	0.0649207	1.51749	0.129144	0.406614	Q9P380
TCONS_00007685	7701.45	0.093169	0.0610653	1.52573	0.127078	0.40403	Q91618
TCONS_00004755	7680.17	0.0496355	0.0816477	0.607923	0.543239	0.80074	Q10358
TCONS_00010283	7674.02	-0.0510656	0.0521358	-0.979472	0.327347	0.645255	Q7T037
TCONS_00000556	7664.14	-0.591713	0.0672689	-8.79624	1.41471e-18	1.6835e-16	P82198
TCONS_00006312	7641	-0.0341206	0.0622143	-0.548437	0.583392	0.818966	B1MTK1
TCONS_00003263	7639.8	0.0590209	0.054267	1.0876	0.27677	0.595928	Q8WTJ4
TCONS_00002110	7630.81	0.0886665	0.0558473	1.58766	0.112363	0.376087	Q54LT8
TCONS_00006296	7627.39	0.0886447	0.0747865	1.1853	0.235897	0.554188	Q9NVA4
TCONS_00002663	7602.05	0.0159644	0.0811322	0.19677	0.844007	0.946879	Q568R1
TCONS_00002735	7586.76	-0.00383367	0.0566343	-0.0676916	0.946031	0.979295	P0DKJ9
TCONS_00000028	7568.7	0.0607787	0.0610853	0.99498	0.319746	0.637814	Q58A42
TCONS_00007793	7553.05	0.0377641	0.0543499	0.694833	0.48716	0.768249	Q94A76
TCONS_00005604	7541.91	0.00880415	0.0555594	0.158464	0.874091	0.955066	O13717
TCONS_00010063	7529	0.183219	0.0597826	3.06475	0.00217849	0.0259704	A0A0H5R779
TCONS_00004968	7517.93	-0.0889349	0.0546098	-1.62855	0.103408	0.358011	P56399
TCONS_00014561	7501.29	-0.0494189	0.0749363	-0.659479	0.509588	0.781384	P10401
TCONS_00006463	7500.21	0.0270809	0.0580335	0.466643	0.640756	0.851022	Q92890
TCONS_00003146	7478.85	-0.0603063	0.0761688	-0.791745	0.428509	0.726612	O23617
TCONS_00008147	7471.85	-0.0166195	0.0760163	-0.21863	0.826938	0.940235	P84175
TCONS_00005382	7468.88	-0.00581785	0.068989	-0.0843301	0.932794	0.976511	Q60520
TCONS_00010100	7464.36	-0.0308794	0.0617262	-0.500264	0.616889	0.837976	Q9LHE5
TCONS_00001305	7421.21	-0.0324072	0.055508	-0.583829	0.559335	0.807323	Q6Z382
TCONS_00004746	7415.2	0.101437	0.0620004	1.63606	0.101826	0.355458	Q8W0W3
TCONS_00007539	7400.4	-0.0529361	0.0743955	-0.71155	0.476744	0.762574	Q8LHP0
TCONS_00003238	7362.49	-0.183055	0.0706219	-2.59204	0.00954081	0.0779166	A0A0H5QSP6
TCONS_00010307	7358.14	0.118552	0.0527356	2.24804	0.0245735	0.148398	A0A0H5QHY9
TCONS_00000881	7341.54	-0.000107276	0.0616514	-0.00174004	0.998612	0.999332	A0A0H5QGH2
TCONS_00002252	7338.46	0.12759	0.060479	2.10966	0.034888	0.185846	A2AHJ4
TCONS_00008186	7338.26	-0.0159676	0.0519944	-0.307102	0.758766	0.912017	P54411
TCONS_00004370	7320.57	0.11	0.0672924	1.63466	0.10212	0.355924	P13656
TCONS_00003037	7315.61	-0.00998732	0.055525	-0.179871	0.857254	0.950501	Q0U194
TCONS_00002320	7293.75	-0.214849	0.0566647	-3.79158	0.000149691	0.00289982	Q8TBC4
TCONS_00011429	7285.65	-0.0804423	0.0568005	-1.41623	0.15671	0.448408	P40937
TCONS_00007865	7281.59	0.0509391	0.0574349	0.886901	0.375132	0.684524	Q84M92
TCONS_00003236	7275.96	0.00640638	0.0587159	0.109108	0.913117	0.972314	A0A0H5R5U9
TCONS_00011508	7274.18	-0.100136	0.0559	-1.79134	0.0732384	0.29558	O94480
TCONS_00009764	7256.27	-0.1173	0.0624445	-1.87846	0.060318	0.265949	P10978
TCONS_00002671	7250.48	0.0795446	0.0684788	1.16159	0.2454	0.564107	Q3T196
TCONS_00009576	7243.88	0.248196	0.0892072	2.78225	0.00539838	0.0522186	Q9ES34
TCONS_00007058	7242.99	-0.183608	0.0729862	-2.51566	0.011881	0.0903827	Q96RL7
TCONS_00007486	7241.46	0.104408	0.0640894	1.62911	0.103291	0.358004	A0A0H5R946
TCONS_00009297	7229.52	-0.0345794	0.0635903	-0.543784	0.58659	0.820467	A0A0H5R631
TCONS_00003684	7229.09	-0.0507118	0.055396	-0.915441	0.35996	0.672491	Q8RHT8
TCONS_00000250	7207.41	0.0866979	0.0630739	1.37454	0.169273	0.47175	F4HYD7
TCONS_00000210	7205	0.0325247	0.0551058	0.590223	0.555041	0.804436	A4IF62
TCONS_00008658	7196	-0.0256989	0.070751	-0.363231	0.716432	0.889567	A4IGU3
TCONS_00004556	7178.9	0.261159	0.0586603	4.45206	8.50516e-06	0.000244303	Q23917
TCONS_00002935	7172.02	-0.119307	0.0539309	-2.21222	0.0269516	0.15645	Q3SYZ4
TCONS_00002967	7149.72	-0.077506	0.0731342	-1.05978	0.289246	0.610274	A0A0H5RG45
TCONS_00010193	7133.07	0.0996036	0.0565098	1.76259	0.0779696	0.305821	Q9FJL3
TCONS_00007841	7132.68	0.053016	0.0687629	0.770998	0.440708	0.735139	O88844
TCONS_00014517	7132.04	-0.462882	0.0741091	-6.24595	4.21226e-10	2.62341e-08	A0A0H5R4Z5
TCONS_00004177	7122.57	-0.0529698	0.0579528	-0.914017	0.360708	0.672634	P42374
TCONS_00012087	7108.39	0.0112841	0.0572069	0.197251	0.843631	0.946776	Q9HH99
TCONS_00006295	7106.5	0.0369212	0.0537653	0.68671	0.492265	0.770422	A0A0H5R636
TCONS_00013004	7103.62	-0.171094	0.0795782	-2.15001	0.0315547	0.175046	A0A0H5R2D1
TCONS_00005965	7086.56	0.0163935	0.0525823	0.311768	0.755217	0.910743	A0A0H5R6G5
TCONS_00005309	7053.54	-0.0316384	0.054988	-0.575369	0.565042	0.810993	F4HQA1
TCONS_00009128	7048.32	0.0652871	0.0798944	0.817168	0.413833	0.714821	Q9SSF1
TCONS_00003095	7033.19	0.154776	0.0694078	2.22995	0.0257509	0.152131	Q8YRI1
TCONS_00008510	7033.12	0.145617	0.0657822	2.21362	0.0268549	0.156253	Q9P8I0
TCONS_00003695	6992.96	0.0761927	0.0565316	1.34779	0.177727	0.484603	B8AM21
TCONS_00000448	6991.92	0.12729	0.0556705	2.28649	0.0222255	0.139605	A0A0H5R8X3
TCONS_00014293	6974.71	-0.115471	0.0651262	-1.77304	0.0762224	0.301631	A0A0H5QJR2
TCONS_00002446	6967.95	-0.173952	0.067332	-2.5835	0.00978026	0.0795796	Q8AYC1
TCONS_00000222	6950.96	0.0674272	0.0549398	1.22729	0.219712	0.537975	Q498E7
TCONS_00011948	6943.61	-0.0383269	0.0836096	-0.458403	0.646663	0.853732	A0A0H5R5F6
TCONS_00001769	6942.76	0.223284	0.0677281	3.29678	0.000978017	0.0135218	A0A0H5QFA1
TCONS_00001401	6937.16	-0.12748	0.0545899	-2.33523	0.0195315	0.127731	Q7F830
TCONS_00012200	6893.45	0.184496	0.0666171	2.7695	0.00561429	0.0535245	Q9FIB6
TCONS_00003450	6874.54	-0.150253	0.0534099	-2.8132	0.00490512	0.0486425	Q9R0P3
TCONS_00001840	6850.86	-0.0593705	0.0553701	-1.07225	0.283608	0.604209	Q32LM2
TCONS_00007312	6833.49	0.139423	0.0533371	2.61399	0.00894913	0.0741824	Q66I85
TCONS_00000603	6819.08	0.0146344	0.0563604	0.259656	0.795129	0.925449	A0A0H5R6V7
TCONS_00002269	6802.91	0.0443084	0.0576408	0.768699	0.442072	0.736124	A0A0H5RNK5
TCONS_00000847	6798.53	-0.311364	0.056433	-5.51741	3.44027e-08	1.59208e-06	P73248
TCONS_00005349	6792.57	0.135451	0.0629577	2.15146	0.0314399	0.174708	Q9ERU9
TCONS_00003189	6790.98	0.130921	0.0887519	1.47514	0.140175	0.425022	A0A0H5R8Q1
TCONS_00013296	6787.67	-0.00238067	0.0683768	-0.0348169	0.972226	0.990628	Q196X6
TCONS_00010285	6766.64	-0.0580334	0.0698345	-0.831013	0.405967	0.708254	Q8W4K1
TCONS_00006845	6748.73	0.0862715	0.0544401	1.5847	0.113034	0.377761	F4JSE7
TCONS_00003718	6738.63	-0.00185448	0.0644388	-0.0287789	0.977041	0.991322	Q12769
TCONS_00011005	6737.8	-0.100211	0.0547003	-1.83201	0.0669503	0.282452	Q94KU2
TCONS_00001198	6688.29	0.0396329	0.0684856	0.578704	0.562789	0.809022	A0A0H5R9H6
TCONS_00008669	6682.83	-0.0756117	0.0604998	-1.24978	0.211378	0.530225	Q84MD8
TCONS_00003023	6682.38	0.191877	0.0683545	2.80708	0.00499922	0.0492384	Q8LG03
TCONS_00008806	6629.66	0.018627	0.0628194	0.296517	0.766835	0.915627	B6JWP7
TCONS_00005993	6609.29	0.129205	0.056881	2.2715	0.0231167	0.142903	Q2QPW1
TCONS_00010564	6599.64	-0.190882	0.0557648	-3.42298	0.000619391	0.00929645	Q6EE31
TCONS_00003257	6584.85	0.0129429	0.0584019	0.221617	0.824612	0.939718	D2GXY4
TCONS_00010284	6546.73	-0.0456843	0.0528665	-0.864144	0.387509	0.694743	Q8W4K1
TCONS_00012665	6540.44	-0.0266958	0.0668107	-0.399573	0.689471	0.879019	A0A0H5QMN5
TCONS_00003004	6522.41	0.0541915	0.0595189	0.910492	0.362563	0.674894	O04331
TCONS_00010275	6522.24	0.101165	0.0536056	1.88721	0.0591318	0.262004	A0A0H5RNY3
TCONS_00001422	6520.43	-0.142169	0.0562917	-2.52558	0.0115509	0.0884851	P24918
TCONS_00007437	6497.14	0.181368	0.0710327	2.5533	0.0106708	0.0839555	A0A0H5QHB0
TCONS_00008703	6490.27	0.130828	0.0572893	2.28364	0.0223926	0.13985	O23657
TCONS_00008238	6472.56	0.180788	0.068213	2.65034	0.00804111	0.0685369	Q1MTN8
TCONS_00001824	6471.74	-0.129761	0.0643109	-2.01771	0.0436211	0.217161	A2VD82
TCONS_00001201	6457.3	-0.0397179	0.057721	-0.688102	0.491389	0.769994	Q63871
TCONS_00003871	6449.82	0.14282	0.0829819	1.7211	0.085232	0.320749	Q9UT33
TCONS_00001241	6429.52	0.0126201	0.0651689	0.193652	0.846448	0.948341	P04905
TCONS_00005487	6411.76	0.143774	0.0542306	2.65116	0.00802161	0.0685333	A0A0H5QQZ6
TCONS_00008839	6397.71	-0.095771	0.0561498	-1.70563	0.0880762	0.326986	A0A0H5QQD6
TCONS_00001102	6381.59	0.0822919	0.0538284	1.52878	0.126318	0.403112	Q2TAD9
TCONS_00011179	6373.64	0.105059	0.0580331	1.81033	0.0702444	0.288115	A0A0H5QNG9
TCONS_00006357	6368.31	0.0396717	0.0574795	0.690188	0.490076	0.769521	Q9M0V3
TCONS_00011636	6360.03	-0.0555614	0.0662221	-0.839017	0.40146	0.705086	Q8GYX8
TCONS_00000067	6358.43	0.174901	0.0602902	2.90099	0.00371986	0.0396606	Q9M9Y4
TCONS_00011241	6352.99	0.0284697	0.0579956	0.490895	0.623501	0.84148	Q54DF7
TCONS_00002344	6335.05	0.0156309	0.0587328	0.266135	0.790135	0.92371	Q8CDZ2
TCONS_00014330	6309.12	0.0422479	0.0840508	0.502648	0.615212	0.837976	A0A0H5RBQ5
TCONS_00013889	6308.18	-0.0732974	0.0622983	-1.17655	0.239373	0.557292	Q54K95
TCONS_00003431	6304.92	-0.0102259	0.055903	-0.182922	0.854859	0.950097	P32073
TCONS_00005629	6288.41	0.13566	0.0527576	2.57138	0.0101295	0.0814269	P40566
TCONS_00003478	6284.87	0.0561067	0.061674	0.909729	0.362965	0.675241	A0A1L8HCK2
TCONS_00005796	6282.57	0.0792811	0.0546694	1.45019	0.147005	0.434532	Q9LRE5
TCONS_00011648	6280.92	0.114887	0.0540579	2.12526	0.0335649	0.182593	A0A0H5QYT5
TCONS_00002954	6238.72	0.15943	0.0718692	2.21833	0.0265322	0.155369	O95639
TCONS_00011500	6232.32	-0.0671458	0.0535155	-1.2547	0.209589	0.527654	Q8GWG0
TCONS_00011746	6230.7	-0.0375751	0.0673247	-0.558117	0.576764	0.816215	A0A0H5QUY2
TCONS_00001517	6208.55	0.112981	0.0562775	2.00758	0.0446882	0.220922	Q7SGL3
TCONS_00005834	6207.84	0.0401366	0.0654435	0.613302	0.539677	0.799295	Q8T1C6
TCONS_00013470	6202.15	0.120789	0.0557183	2.16784	0.0301706	0.169668	Q9SHZ6
TCONS_00002877	6195.21	0.175898	0.0714664	2.46127	0.0138445	0.10072	A6QR55
TCONS_00007799	6194.55	-0.0367648	0.0610818	-0.601894	0.547245	0.801625	Q54ND1
TCONS_00008411	6185.3	-0.0174164	0.0738217	-0.235925	0.813491	0.934498	A1A5G0
TCONS_00007115	6178.12	0.103046	0.0732334	1.40708	0.159402	0.453762	Q54MH3
TCONS_00002364	6175.06	-0.0769397	0.057115	-1.3471	0.177948	0.484809	Q55AI5
TCONS_00008867	6114.28	-0.0130345	0.0592647	-0.219937	0.82592	0.939718	Q5RFM4
TCONS_00011656	6106.13	0.103836	0.0583054	1.78089	0.0749298	0.298644	Q9Z2A5
TCONS_00003264	6083.15	0.231658	0.0604828	3.83015	0.000128065	0.00252492	A0A0H5RS07
TCONS_00000798	6079.59	-0.0313479	0.0536251	-0.584575	0.558833	0.807248	B6JY16
TCONS_00002664	6072.21	-0.0234719	0.0556899	-0.421475	0.673408	0.869072	O75110
TCONS_00012491	6069.56	-0.0379201	0.061672	-0.614867	0.538643	0.799295	Q54DS4
TCONS_00006305	6051.79	0.286094	0.0557684	5.13003	2.8969e-07	1.10948e-05	Q9SRZ0
TCONS_00011587	6023.03	0.00714556	0.0699971	0.102084	0.91869	0.973333	O42937
TCONS_00006409	6020.58	-0.783865	0.0589506	-13.297	2.41003e-40	6.1771e-38	A0A0H5QKE5
TCONS_00011653	6014.74	0.103067	0.060103	1.71484	0.086375	0.32301	P37454
TCONS_00011857	6006	0.0347123	0.061109	0.568039	0.570009	0.814127	Q9FND4
TCONS_00009811	6002.38	0.0568699	0.0569249	0.999034	0.317778	0.635315	A0A0H5R9I9
TCONS_00002550	6000.24	-0.122386	0.0599862	-2.04024	0.0413266	0.208953	Q8SSJ5
TCONS_00003009	5996.8	0.0332835	0.0715375	0.465259	0.641746	0.851572	Q94BR5
TCONS_00008667	5996.79	-0.0245133	0.0673552	-0.363941	0.715902	0.889498	A4IGU3
TCONS_00007664	5988.6	0.167918	0.05547	3.02719	0.00246839	0.0287074	O95199
TCONS_00011820	5984.16	0.123986	0.055542	2.23229	0.0255957	0.151617	Q3SB10
TCONS_00009123	5974.67	0.28874	0.0634829	4.54831	5.40778e-06	0.00016684	A0A0H5R6I3
TCONS_00014880	5970.22	0.0463496	0.0625533	0.740962	0.458716	0.750525	A0A0H5QT98
TCONS_00005132	5956.33	0.105508	0.0578822	1.82281	0.0683323	0.284726	Q54YD4
TCONS_00006422	5940.79	0.168953	0.0682141	2.4768	0.0132565	0.0976146	Q9DC23
TCONS_00011171	5903.53	0.100827	0.059653	1.69023	0.0909835	0.3334	A0A0H5RDP2
TCONS_00010341	5900.05	-0.0426757	0.0552388	-0.772568	0.439778	0.734507	Q945S8
TCONS_00005381	5899.54	0.060855	0.0728637	0.83519	0.403611	0.706505	Q9FF81
TCONS_00004884	5894.47	0.0778839	0.0564349	1.38007	0.167566	0.469327	P97868
TCONS_00006720	5886.66	0.0663247	0.0555677	1.19358	0.232641	0.550149	Q52JK6
TCONS_00001087	5885.88	0.0689676	0.0677258	1.01834	0.308518	0.628928	P08879
TCONS_00002314	5882.57	0.0330684	0.0566071	0.584174	0.559103	0.807248	Q26061
TCONS_00009836	5876.89	0.00331202	0.0595533	0.0556144	0.955649	0.982797	Q54QJ9
TCONS_00008976	5859.88	-0.0246245	0.0575704	-0.427729	0.668848	0.865813	P34145
TCONS_00006816	5845.79	0.0320351	0.0630679	0.507946	0.611491	0.836198	A0A0H5R9M5
TCONS_00008563	5834.23	0.00481623	0.0607958	0.0792198	0.936858	0.978187	A0A0H5RPM4
TCONS_00005473	5828.06	0.00523394	0.0629991	0.0830797	0.933788	0.976733	Q76NT0
TCONS_00002513	5824.62	0.116016	0.0694553	1.67037	0.0948471	0.340184	P49689
TCONS_00008140	5814.9	-0.00800849	0.0722476	-0.110848	0.911737	0.971787	A0A0H5QIJ6
TCONS_00011010	5809.9	0.207493	0.0569531	3.64323	0.000269241	0.00481025	A0A0H5R4M3
TCONS_00008085	5807.27	0.0849337	0.0732194	1.15999	0.246053	0.564512	Q91VC9
TCONS_00002429	5787.54	-0.0702574	0.0579311	-1.21278	0.225216	0.542798	Q96DI7
TCONS_00011276	5763.86	0.125423	0.0748922	1.67471	0.0939906	0.338386	Q9YHY6
TCONS_00005804	5758	0.186528	0.06967	2.6773	0.00742172	0.0645671	A0A0H5R9A4
TCONS_00005174	5749.93	0.11666	0.0601576	1.93924	0.052472	0.242997	Q42599
TCONS_00006440	5748.28	0.100323	0.0535777	1.87247	0.0611412	0.26755	Q949Y0
TCONS_00008167	5744.58	0.0286489	0.0571281	0.501486	0.616029	0.837976	A0A0H5RDZ5
TCONS_00009872	5735.66	0.0875334	0.0694656	1.2601	0.207634	0.525114	Q9H9S4
TCONS_00010837	5727.37	0.0372946	0.0544067	0.685478	0.493042	0.770492	Q54MQ7
TCONS_00014136	5717.99	-0.00502286	0.0595433	-0.0843566	0.932773	0.976511	Q2KID0
TCONS_00008348	5715.86	-0.0261085	0.0533048	-0.489797	0.624278	0.841632	Q940B8
TCONS_00007527	5712.9	-0.15022	0.0580517	-2.58769	0.00966227	0.0787156	Q9HC07
TCONS_00000304	5706.17	-0.118464	0.0657457	-1.80186	0.0715677	0.291164	Q5TJG6
TCONS_00007309	5702.45	-0.0821156	0.0847748	-0.968632	0.332729	0.649431	Q54ST3
TCONS_00007625	5691.98	0.0187203	0.0575169	0.325475	0.744822	0.905409	P56286
TCONS_00001258	5657.88	-0.000774	0.0606276	-0.0127665	0.989814	0.996282	Q8YA32
TCONS_00014032	5649.04	-0.00145308	0.0586352	-0.0247816	0.980229	0.992263	A0A0H5RA22
TCONS_00013302	5648.25	0.102954	0.066021	1.55942	0.118897	0.389543	Q5UPG6
TCONS_00008155	5641.02	-0.145382	0.0643498	-2.25925	0.0238677	0.146324	A0A0H5QMY1
TCONS_00001622	5624.73	-0.0198848	0.054577	-0.364343	0.715602	0.889498	A0A0H5RA24
TCONS_00009383	5621.54	0.0679381	0.0621148	1.09375	0.274065	0.59144	Q07536
TCONS_00013020	5619.28	-0.0326872	0.0560211	-0.583481	0.55957	0.807487	Q6INS3
TCONS_00001175	5610.88	0.173867	0.0667139	2.60616	0.00915649	0.075239	O46106
TCONS_00005040	5601.98	-0.0171548	0.0616064	-0.278458	0.780661	0.919951	Q6DE95
TCONS_00007578	5599.8	0.0729564	0.0559532	1.30388	0.192273	0.502672	Q8SSY6
TCONS_00007356	5598.17	0.0329814	0.0658106	0.501156	0.616261	0.837976	A0A0H5RBS6
TCONS_00003796	5594.48	0.0706018	0.0669077	1.05521	0.291329	0.612925	O95104
TCONS_00009052	5585.8	0.21487	0.0701637	3.0624	0.00219568	0.0261285	A0A0H5QRB3
TCONS_00010433	5580.71	0.225626	0.0558037	4.04322	5.27229e-05	0.001191	Q54QP7
TCONS_00012835	5559.21	0.090754	0.069044	1.31444	0.188699	0.498683	A0A0H5R7F1
TCONS_00011316	5554.65	0.0317599	0.0655892	0.484225	0.628226	0.843236	Q5Z856
TCONS_00006668	5554.64	0.147387	0.0544401	2.70732	0.00678287	0.0607541	Q6PH11
TCONS_00001384	5554.51	0.0725467	0.0605475	1.19818	0.230847	0.548778	Q86Y56
TCONS_00000548	5552.53	0.228039	0.0597683	3.81538	0.000135973	0.00266506	Q67XX3
TCONS_00003108	5550.13	-0.00123121	0.0599738	-0.0205292	0.983621	0.993911	Q7DLR9
TCONS_00005749	5541.04	0.0916212	0.0593094	1.5448	0.122395	0.396325	A0A0H5QH64
TCONS_00004716	5522.08	0.120404	0.057476	2.09486	0.0361836	0.190842	Q54Z08
TCONS_00000641	5508.42	0.212091	0.0569528	3.72397	0.000196112	0.00369179	A0A0H5QG72
TCONS_00002612	5502.36	-0.152224	0.057403	-2.65184	0.00800546	0.0684832	Q5ZJA4
TCONS_00004700	5468.57	0.0772344	0.0616705	1.25237	0.210434	0.528983	P36915
TCONS_00012612	5443.63	-0.104069	0.062026	-1.67782	0.093382	0.338205	A0A0H5QYX9
TCONS_00000014	5442.95	-0.0589019	0.0642487	-0.91678	0.359258	0.672269	Q9LNV5
TCONS_00001788	5441.96	0.0998967	0.0702687	1.42164	0.155131	0.44541	A0A0H5R5C3
TCONS_00012682	5438.82	-0.0202291	0.0756825	-0.267289	0.789247	0.923699	B7FAL5
TCONS_00009566	5431.77	0.0310138	0.0608804	0.509422	0.610457	0.835679	Q9UGP8
TCONS_00000675	5428.79	0.187398	0.0601432	3.11586	0.00183409	0.0226941	Q54DU9
TCONS_00000065	5428.33	0.0775789	0.0655293	1.18388	0.236461	0.555045	Q6DEU9
TCONS_00003097	5422.46	0.212794	0.0601917	3.53527	0.000407361	0.00671944	A0A0H5R6A4
TCONS_00006868	5409.91	0.0874505	0.0560639	1.55983	0.118799	0.389543	B4F6J6
TCONS_00002463	5409.76	-0.271094	0.0673171	-4.02712	5.64638e-05	0.00125844	A0A0H5QG20
TCONS_00003032	5395.84	0.0340487	0.0549761	0.619336	0.535695	0.796444	Q9C6S5
TCONS_00004754	5369.23	0.123853	0.0573907	2.15807	0.0309222	0.172729	Q5R7B0
TCONS_00010059	5350.73	-0.174407	0.0716066	-2.43562	0.0148663	0.10528	Q8LCV1
TCONS_00012872	5350.37	0.121232	0.0655272	1.85011	0.0642983	0.276505	P20435
TCONS_00009632	5345.18	-0.136471	0.0704215	-1.93792	0.052633	0.243405	P42856
TCONS_00001350	5342.87	-0.109059	0.0666778	-1.63562	0.10192	0.355486	Q863I2
TCONS_00008894	5342.78	0.0596863	0.0598118	0.997902	0.318327	0.63589	Q9SJ20
TCONS_00009425	5313.19	0.123735	0.0562958	2.19795	0.0279528	0.160446	P28178
TCONS_00003904	5304.87	-0.0584505	0.0579723	-1.00825	0.313335	0.632519	A6W1C7
TCONS_00010008	5304.75	-0.238685	0.0581	-4.10817	3.98805e-05	0.000945779	O60128
TCONS_00005589	5279.93	-0.0357666	0.0599379	-0.596728	0.550689	0.802579	Q05B79
TCONS_00003294	5279.03	0.0968192	0.0592722	1.63347	0.10237	0.356052	Q9C8J2
TCONS_00001540	5277.91	0.117347	0.0753782	1.55677	0.119524	0.390829	Q54RJ4
TCONS_00008625	5259.75	0.0657956	0.0680887	0.966321	0.333883	0.649838	A0CDD4
TCONS_00013996	5241.5	-0.151219	0.0680958	-2.22069	0.0263721	0.15484	P10978
TCONS_00007692	5237.64	-0.0174589	0.0652026	-0.267763	0.788881	0.923433	Q5R630
TCONS_00009827	5229.9	0.109173	0.0656099	1.66397	0.0961188	0.342214	Q5VZM2
TCONS_00006196	5215.79	-0.0024379	0.07526	-0.032393	0.974159	0.990726	Q9CX34
TCONS_00014075	5208.74	-0.245814	0.0853207	-2.88106	0.00396344	0.0415943	A0A0H5QWN3
TCONS_00001450	5185.31	0.167967	0.0738291	2.27508	0.0229008	0.141832	A0A0H5QRW1
TCONS_00000626	5166.7	0.0419793	0.066104	0.635049	0.525397	0.791164	Q5ZJN1
TCONS_00010465	5164.8	0.157265	0.0761597	2.06494	0.0389285	0.200169	Q54P00
TCONS_00013381	5155.48	0.116356	0.0584942	1.98919	0.0466807	0.227271	A0A0H5R6X3
TCONS_00000393	5153.78	0.131014	0.0910866	1.43835	0.150336	0.439277	P49257
TCONS_00007946	5135.53	0.0469071	0.0642881	0.729639	0.465611	0.754538	P53145
TCONS_00002277	5133.46	0.197522	0.0762407	2.59077	0.00957625	0.0781103	Q149F3
TCONS_00006468	5124.7	0.0893406	0.0614334	1.45427	0.145872	0.433583	Q5RCG9
TCONS_00006460	5082.07	0.131714	0.0661038	1.99252	0.0463136	0.226271	P0CG85
TCONS_00011814	5081.11	0.0340233	0.0636748	0.534329	0.593114	0.824491	P38129
TCONS_00001720	5060.89	0.21886	0.0628894	3.48007	0.000501281	0.0078316	Q4V3E2
TCONS_00007602	5050.6	-0.0223227	0.0657579	-0.339468	0.734258	0.901288	A0A0H5QKS8
TCONS_00010679	5046.97	-0.262343	0.0584496	-4.48836	7.17737e-06	0.000216425	Q6GQT9
TCONS_00005767	5020.29	0.0309728	0.0550213	0.562924	0.573487	0.814349	O14686
TCONS_00002212	5006.28	-0.101863	0.0578741	-1.76008	0.078395	0.307247	Q2GLS9
TCONS_00002730	4990.49	0.114953	0.0862909	1.33216	0.182809	0.491028	A0A0H5QJW3
TCONS_00011627	4988.54	-0.109331	0.0625057	-1.74913	0.0802684	0.310813	A0A0H5RC96
TCONS_00009028	4979.34	0.132179	0.0571373	2.31335	0.0207032	0.133172	O14102
TCONS_00014879	4976.73	0.0261147	0.0929862	0.280845	0.778829	0.919664	A0A0H5QU21
TCONS_00000608	4973.49	0.0186225	0.0627266	0.296883	0.766556	0.915627	Q5ZJN1
TCONS_00007994	4954.6	0.0685361	0.0561515	1.22056	0.222254	0.54059	Q7SXR3
TCONS_00003147	4954.57	0.00969457	0.0877636	0.110462	0.912043	0.971787	A0A0H5RP72
TCONS_00006226	4944.72	-0.0353249	0.0611433	-0.577739	0.56344	0.809674	Q8VEH6
TCONS_00011097	4944.14	-0.0994938	0.0592055	-1.68048	0.0928638	0.337235	Q4V869
TCONS_00001461	4918.03	0.215546	0.0558855	3.85693	0.000114821	0.00228407	A0A0H5QPM9
TCONS_00002053	4915.8	-0.0356395	0.0596014	-0.597964	0.549864	0.80232	Q94BX4
TCONS_00006633	4914.41	-0.0972492	0.0565708	-1.71907	0.0856013	0.321718	Q92905
TCONS_00000419	4913.79	0.230127	0.0726707	3.16672	0.00154171	0.0199495	A0A0H5RLV7
TCONS_00009306	4911.51	0.230128	0.0566836	4.05986	4.91017e-05	0.00112445	Q3SWZ7
TCONS_00014375	4889.76	0.0247312	0.0660673	0.374334	0.708156	0.887893	P29557
TCONS_00001339	4889.65	0.0136837	0.068446	0.19992	0.841543	0.946568	P52482
TCONS_00008342	4886.15	-0.120146	0.0605629	-1.98383	0.0472752	0.229288	Q9C0G6
TCONS_00008747	4884.08	0.180034	0.0614982	2.92748	0.00341726	0.0372102	Q6PFH3
TCONS_00012610	4870.26	0.391331	0.0727952	5.37578	7.62522e-08	3.29964e-06	Q9P2E3
TCONS_00014860	4850.28	-0.00657755	0.0811399	-0.0810643	0.935391	0.977642	A0A0H5R2N6
TCONS_00003943	4849.2	0.0584483	0.0583222	1.00216	0.316265	0.634859	A0A0H5QHH3
TCONS_00009770	4846.39	0.0805082	0.0661951	1.21622	0.223899	0.541978	A0A0H5RBD8
TCONS_00012103	4840.34	-0.0677482	0.056068	-1.20832	0.226923	0.54514	Q8W117
TCONS_00009557	4836.97	0.224974	0.0655289	3.4332	0.000596501	0.0089934	Q8K4Q0
TCONS_00010363	4829.93	0.0886873	0.0562238	1.5774	0.114704	0.380909	Q9LV09
TCONS_00000837	4827.72	0.1615	0.0573195	2.81754	0.00483925	0.0481325	Q9P7R4
TCONS_00002555	4819.23	-0.0378803	0.0582365	-0.650457	0.515397	0.784776	Q54MZ3
TCONS_00003013	4808.26	0.28113	0.0701211	4.00921	6.09232e-05	0.00133991	O80513
TCONS_00002643	4803.77	0.0470247	0.0617517	0.761513	0.446351	0.739538	A2XDG4
TCONS_00008097	4796.04	0.0583425	0.0631083	0.924482	0.355235	0.669861	A0A0H5R3D5
TCONS_00003206	4790.84	-0.0819346	0.0684807	-1.19646	0.231516	0.548778	Q9BRS2
TCONS_00014135	4777.07	-0.00935649	0.0581276	-0.160965	0.872121	0.954496	Q8VBV3
TCONS_00008898	4764.77	0.0242449	0.0653885	0.370783	0.7108	0.8882	A0A0H5RAN4
TCONS_00008467	4759.9	0.0302151	0.0699193	0.432142	0.665638	0.863839	P98192
TCONS_00003381	4759.46	-0.133318	0.0810643	-1.6446	0.100052	0.351725	A0A0H5RBI6
TCONS_00007964	4746.02	0.12367	0.0624929	1.97894	0.0478226	0.231438	P49419
TCONS_00001496	4742.5	-0.112227	0.057649	-1.94673	0.0515672	0.241154	P79896
TCONS_00011115	4740.12	-0.0199883	0.0633332	-0.315606	0.752302	0.90913	Q04832
TCONS_00014023	4740.01	0.131515	0.0675491	1.94695	0.0515412	0.241154	P44135
TCONS_00009443	4730.22	0.0729954	0.0635573	1.1485	0.250764	0.569104	A5D9C6
TCONS_00000118	4725.36	0.10096	0.0571358	1.76702	0.0772256	0.303797	A0A0H5R7Q2
TCONS_00004661	4722.63	-0.0744308	0.0613536	-1.21315	0.225074	0.542798	A0A0H5RQP7
TCONS_00009634	4721.56	0.00585311	0.0697257	0.0839448	0.9331	0.976606	A0A0H5RG73
TCONS_00000547	4721.46	-0.0892905	0.0590237	-1.51279	0.130333	0.409023	Q4R380
TCONS_00009224	4685.56	0.137113	0.0730163	1.87784	0.0604027	0.265949	Q9H2T7
TCONS_00002017	4680.73	0.099613	0.0645655	1.54282	0.122874	0.397313	A0A0H5QKA2
TCONS_00001844	4677.71	-0.0224764	0.0560475	-0.401024	0.688402	0.878329	P22734
TCONS_00013133	4677.61	-0.375114	0.0654066	-5.73511	9.74491e-09	5.03411e-07	Q2S338
TCONS_00005970	4676.48	-0.02868	0.0755857	-0.379437	0.704364	0.885805	Q5HZV9
TCONS_00007604	4667.61	0.0518677	0.063256	0.819965	0.412236	0.713358	P36579
TCONS_00007372	4641.12	0.11422	0.0681348	1.67639	0.0936622	0.338301	Q28F72
TCONS_00011148	4641.04	-0.048672	0.0585772	-0.830903	0.406028	0.708254	Q9C7P2
TCONS_00001009	4634.66	-0.00918156	0.0636143	-0.144332	0.885238	0.961413	A0A0H5QJD1
TCONS_00000872	4629.59	-0.00351204	0.0602691	-0.0582726	0.953531	0.981918	P08906
TCONS_00000269	4624.4	0.13204	0.0745463	1.77125	0.0765187	0.302086	Q32PI5
TCONS_00009454	4623.3	-0.00640616	0.07112	-0.0900754	0.928227	0.975048	A0A0H5R6V3
TCONS_00003595	4609.23	0.0113313	0.0603567	0.187739	0.851082	0.949352	Q0VCI1
TCONS_00001928	4608.01	-0.0821126	0.0552363	-1.48657	0.137129	0.419957	F4K2E9
TCONS_00011302	4607.58	-0.0165015	0.0780284	-0.21148	0.832512	0.942232	A0A0H5QFA6
TCONS_00000596	4604.82	0.126172	0.0580732	2.17263	0.0298079	0.168339	A0A0H5R4S7
TCONS_00001730	4604.04	0.0228211	0.070432	0.324016	0.745926	0.906263	Q5R4W6
TCONS_00008759	4603.76	-0.114704	0.0666476	-1.72105	0.0852412	0.320749	Q8YRI1
TCONS_00003950	4591.51	0.0414495	0.0580733	0.713744	0.475386	0.761898	Q9VNA8
TCONS_00000004	4584.36	-0.0742619	0.0596677	-1.24459	0.213282	0.531807	Q42434
TCONS_00012977	4584.2	-0.0224801	0.0622749	-0.360981	0.718113	0.89027	A0A0H5RGP4
TCONS_00007077	4574.31	-0.0100543	0.0644109	-0.156096	0.875957	0.955712	Q6G563
TCONS_00001975	4567	0.109177	0.0584717	1.86717	0.0618776	0.269481	Q5E9B3
TCONS_00013992	4566.81	-0.147717	0.0632272	-2.33629	0.0194763	0.127495	Q9ZT94
TCONS_00014417	4563.99	-0.130867	0.0613155	-2.13432	0.0328165	0.179845	Q7TN75
TCONS_00007264	4559.25	-0.0166647	0.0617386	-0.269923	0.787219	0.922677	Q29RM3
TCONS_00012551	4558.28	0.0405219	0.0697622	0.580858	0.561336	0.80846	A0A0H5R5G9
TCONS_00004475	4555.31	-0.00247685	0.0631928	-0.0391951	0.968735	0.98922	A0A0H5RMT7
TCONS_00005784	4550.67	-0.0807481	0.0664041	-1.21601	0.223981	0.541979	Q61E63
TCONS_00001010	4526.77	0.0360059	0.065806	0.547153	0.584274	0.81907	A0A0H5R8A5
TCONS_00006697	4519.6	0.0165824	0.0571672	0.290069	0.771763	0.917961	A7RKS5
TCONS_00014564	4515.03	-0.0365869	0.0575698	-0.635522	0.525088	0.791135	Q5UPG6
TCONS_00001193	4510.49	-0.0649028	0.0609332	-1.06515	0.286809	0.607339	P09417
TCONS_00005595	4503.81	-0.150881	0.0640485	-2.35573	0.0184861	0.123069	A0A0H5QR48
TCONS_00000013	4500.9	0.00122975	0.0602159	0.0204224	0.983706	0.993911	Q8R086
TCONS_00012606	4495.07	0.0622235	0.0621434	1.00129	0.316687	0.634859	Q73E41
TCONS_00009222	4492.76	0.0920094	0.0605702	1.51905	0.128749	0.406053	Q91Z38
TCONS_00007523	4463.91	0.0442994	0.0638445	0.693864	0.487768	0.768436	O88984
TCONS_00010177	4462.89	0.0791219	0.0885662	0.893364	0.371662	0.681363	Q9SZ15
TCONS_00001151	4462.32	-0.0819779	0.0620695	-1.32074	0.186586	0.496174	Q99JF5
TCONS_00003243	4459.4	0.0728355	0.0859758	0.847162	0.396905	0.70149	Q9SMH3
TCONS_00008052	4456.43	0.0519238	0.0826354	0.628348	0.529776	0.792286	Q6NRB9
TCONS_00004604	4456.07	0.0924045	0.0606235	1.52424	0.12745	0.40463	P34648
TCONS_00004642	4438.53	-0.0475154	0.0703066	-0.675831	0.499148	0.774103	Q3U1Y4
TCONS_00005200	4438.35	-0.0349591	0.08644	-0.404433	0.685895	0.876808	Q39290
TCONS_00004561	4430.92	0.0753419	0.0744002	1.01266	0.311224	0.631127	O74366
TCONS_00011464	4428.84	-0.155746	0.0614202	-2.53574	0.0112211	0.086648	Q9D180
TCONS_00001709	4420.76	0.0173672	0.0762132	0.227877	0.819742	0.936705	Q54BC6
TCONS_00010621	4420.44	-0.200495	0.0894106	-2.24241	0.0249348	0.149969	A0A0H5R726
TCONS_00003622	4413.55	-0.0266826	0.0818262	-0.326088	0.744358	0.905182	O04658
TCONS_00006632	4409.87	0.000776642	0.0629242	0.0123425	0.990152	0.996282	Q8H0V6
TCONS_00002069	4387.58	-0.298761	0.0638578	-4.67853	2.88933e-06	9.25698e-05	Q10I26
TCONS_00002336	4383.39	-0.0265941	0.065675	-0.404934	0.685526	0.876673	Q28262
TCONS_00005673	4379.88	-0.038052	0.0777496	-0.489417	0.624546	0.841711	A0A0H5QJP0
TCONS_00008474	4367.56	-0.120915	0.0836082	-1.44621	0.148119	0.435756	Q96VN3
TCONS_00006450	4361	-0.316348	0.0628313	-5.03489	4.78131e-07	1.78004e-05	P29677
TCONS_00005035	4360.26	0.124329	0.061042	2.03678	0.041672	0.210221	Q6GQN8
TCONS_00004194	4355.11	0.0743821	0.0631969	1.17699	0.239199	0.557292	Q3IDL2
TCONS_00004366	4347.02	0.136341	0.0814809	1.67329	0.0942697	0.339025	A0A0H5R4C5
TCONS_00000698	4334.8	0.055469	0.0743235	0.746319	0.455475	0.746871	Q96G03
TCONS_00007596	4305.99	0.101407	0.0648482	1.56376	0.117874	0.387716	Q9SZJ5
TCONS_00013124	4296.67	0.0584444	0.0569342	1.02653	0.304644	0.624442	Q9D8T4
TCONS_00004042	4296.06	0.0450614	0.067361	0.668953	0.503525	0.776869	A0A0H5RB72
TCONS_00001985	4289.19	0.0186805	0.0577947	0.323222	0.746527	0.906498	O45830
TCONS_00010532	4288.72	0.0994603	0.0611588	1.62626	0.103894	0.358543	Q6FNV4
TCONS_00013904	4285.18	0.0827195	0.0612896	1.34965	0.177129	0.484245	O77210
TCONS_00006817	4280.11	0.053604	0.0695045	0.771231	0.44057	0.735092	Q54RU1
TCONS_00007204	4279.47	-0.0717582	0.0860564	-0.833851	0.404365	0.707134	P0CH35
TCONS_00006935	4275.55	-0.0155186	0.0625525	-0.248089	0.804066	0.929959	A5VSQ0
TCONS_00009442	4268.74	0.041558	0.0654818	0.63465	0.525657	0.791164	A0A0H5R6Q0
TCONS_00005228	4266.42	0.043169	0.0831388	0.51924	0.603593	0.832439	A0A0H5RQ33
TCONS_00009598	4257.57	0.114752	0.061462	1.86704	0.0618966	0.269481	A0A0H5R4T3
TCONS_00001089	4257.29	-0.145656	0.0629214	-2.31489	0.0206191	0.132759	P32604
TCONS_00012500	4239.47	-0.0879482	0.0610046	-1.44167	0.149397	0.43781	Q6PFM4
TCONS_00009873	4237.65	0.160188	0.128438	1.2472	0.212323	0.531061	P61129
TCONS_00009309	4215.21	-0.124259	0.0599464	-2.07284	0.038187	0.197423	Q9UJX6
TCONS_00001700	4215.17	-0.0716	0.0620145	-1.15457	0.248267	0.566451	Q9D783
TCONS_00000821	4203.34	-0.223282	0.0766649	-2.91244	0.00358614	0.0387327	A0A0H5R7J3
TCONS_00008198	4196.96	-0.17216	0.057741	-2.98159	0.00286752	0.032279	P02599
TCONS_00003961	4193.46	0.0299889	0.0680514	0.440679	0.659445	0.860404	Q9LET3
TCONS_00002339	4179.73	0.101671	0.0673504	1.50959	0.131148	0.40993	Q8NI29
TCONS_00008354	4174.22	0.150205	0.0657945	2.28294	0.022434	0.13985	P12759
TCONS_00012455	4171.91	-0.0146535	0.0631044	-0.232211	0.816374	0.936211	Q75B82
TCONS_00008889	4168.96	0.101986	0.0641028	1.59098	0.111614	0.374715	A0A0H5QLV6
TCONS_00012589	4165.09	-0.536608	0.0834967	-6.42669	1.30413e-10	8.52029e-09	P10978
TCONS_00005509	4153.88	-0.119564	0.0617771	-1.93542	0.0529392	0.244143	Q93YP7
TCONS_00006287	4143.38	0.12544	0.0618678	2.02755	0.0426066	0.214177	A0A0H5QN03
TCONS_00004660	4139.11	0.0170712	0.0586431	0.291104	0.770972	0.917633	A0A0H5RSA7
TCONS_00001608	4136.88	-0.0421662	0.0583221	-0.722989	0.469687	0.757784	Q24K00
TCONS_00008761	4135.53	0.021971	0.0624481	0.351827	0.724968	0.894664	Q54PR9
TCONS_00008995	4126.06	0.077412	0.0643461	1.20306	0.228955	0.546465	Q54K57
TCONS_00007969	4124.72	-0.0744287	0.0644116	-1.15552	0.247879	0.566451	A0A0H5R0A2
TCONS_00012154	4123.3	-0.0922353	0.0595469	-1.54895	0.121393	0.394039	Q9R1T3
TCONS_00000327	4122.28	0.0520698	0.0570408	0.912852	0.36132	0.672957	P46870
TCONS_00011705	4120.7	0.0909307	0.0604489	1.50426	0.132515	0.411885	Q6NLH0
TCONS_00008967	4115.4	0.161347	0.0617062	2.61476	0.0089291	0.0741824	A9AJS6
TCONS_00001499	4113.76	-0.115683	0.0606282	-1.90807	0.0563815	0.253698	A2APY7
TCONS_00000919	4078.9	0.0658853	0.0604084	1.09066	0.275421	0.593597	P20054
TCONS_00004457	4076.44	0.144401	0.0644791	2.2395	0.0251232	0.150508	A0A0H5R6C7
TCONS_00013802	4074.81	-0.0452583	0.0660825	-0.684876	0.493422	0.770492	P04146
TCONS_00009107	4071.35	0.119303	0.0704669	1.69304	0.0904483	0.332284	Q9SII8
TCONS_00012518	4069	-0.0972702	0.0601182	-1.61798	0.105666	0.363343	Q86AD5
TCONS_00000618	4046.02	0.0502503	0.0772638	0.650373	0.515451	0.784776	A0A0H5R6I7
TCONS_00003120	4041.41	0.247898	0.0754871	3.28399	0.0010235	0.0140342	O05510
TCONS_00000392	4034.68	-0.0946479	0.061717	-1.53358	0.125133	0.401486	A0A0H5RNF6
TCONS_00011122	4033.39	0.0773746	0.0562269	1.37611	0.168786	0.471215	A0A0H5R8N9
TCONS_00000893	4032.73	0.0244332	0.0625832	0.390412	0.696232	0.882104	A0A0H5RA21
TCONS_00009241	4030.96	0.0206389	0.073655	0.28021	0.779316	0.919692	Q87H52
TCONS_00004629	4028.42	-0.0417478	0.08056	-0.518221	0.604304	0.8327	Q0J3D9
TCONS_00001708	4026.7	0.0534142	0.056669	0.942564	0.345904	0.662983	A0A0H5R5H9
TCONS_00008602	4015.25	-1.66689	0.0650124	-25.6396	5.51918e-145	7.35597e-142	O54909
TCONS_00001231	4004.3	-0.0329297	0.0633101	-0.520134	0.60297	0.832439	Q9XX14
TCONS_00000694	3973.09	0.0154738	0.0642866	0.2407	0.809787	0.932186	Q10449
TCONS_00006046	3963.05	-0.0274758	0.0576491	-0.476604	0.633644	0.847054	A0A0H5R9Q2
TCONS_00008065	3958.66	0.0272566	0.0681629	0.399874	0.689249	0.878905	Q9W6K1
TCONS_00006160	3947.44	0.0220169	0.0653132	0.337097	0.736043	0.90226	A0A0H5RQ57
TCONS_00007099	3943.66	0.11725	0.0612861	1.91316	0.0557277	0.251435	Q7XA87
TCONS_00007556	3931.54	0.0762903	0.0621656	1.22721	0.219743	0.537975	A0A0H5R688
TCONS_00001285	3925.26	0.191135	0.0636172	3.00446	0.00266056	0.0304116	Q7XUW5
TCONS_00003245	3920.58	0.0096491	0.0695462	0.138744	0.889653	0.963381	Q54UB5
TCONS_00006503	3919.93	-0.0365043	0.0603638	-0.604738	0.545353	0.80162	P48445
TCONS_00000943	3912.57	0.0436213	0.0659452	0.661477	0.508306	0.780137	Q54WI8
TCONS_00004950	3906.12	0.177861	0.0697258	2.55086	0.0107459	0.0843467	O80996
TCONS_00013397	3904.21	-0.0675813	0.0622406	-1.08581	0.277564	0.596733	A0A0H5R907
TCONS_00013805	3903.01	0.000750349	0.0605105	0.0124003	0.990106	0.996282	A0A0H5RCC3
TCONS_00001130	3894.59	0.206082	0.0677937	3.03984	0.00236701	0.0277707	O46106
TCONS_00007363	3887.96	0.149318	0.0772246	1.93355	0.0531683	0.244892	Q4KLA0
TCONS_00009586	3878.73	0.260272	0.0593892	4.38247	1.17339e-05	0.000320734	Q944A6
TCONS_00011266	3871.82	-0.0942819	0.0597947	-1.57676	0.114851	0.381159	D4AAT7
TCONS_00006966	3870.87	-0.301876	0.0728236	-4.1453	3.39362e-05	0.000813492	Q6P5M2
TCONS_00007639	3869.94	-0.0411741	0.0710405	-0.579586	0.562194	0.809022	Q00004
TCONS_00010488	3860.29	0.0518221	0.0624338	0.830034	0.40652	0.708618	P0C7B6
TCONS_00005241	3858.06	-0.0286996	0.0587369	-0.488613	0.625116	0.84208	Q6BS60
TCONS_00013784	3852.08	0.0261319	0.0821522	0.318091	0.750416	0.908701	Q4P6X6
TCONS_00003749	3849.91	0.136646	0.0837988	1.63064	0.102966	0.357752	A0A0H5R712
TCONS_00007921	3835.62	0.105307	0.0587938	1.79112	0.073274	0.29558	Q96CS3
TCONS_00011910	3834.89	-0.0398464	0.134745	-0.295716	0.767447	0.915627	A0A0H5QYD0
TCONS_00007601	3832.89	-4.1085	0.0750574	-54.7381	0	0	A0A0H5RQE3
TCONS_00001237	3824.47	0.0172778	0.0654988	0.263788	0.791943	0.924419	Q9HE88
TCONS_00004230	3824.18	0.0635463	0.0723382	0.878461	0.379694	0.68904	Q9H201
TCONS_00008768	3819.18	-0.0215181	0.0701615	-0.306694	0.759077	0.912017	A0R5M8
TCONS_00005644	3815.75	0.210646	0.0600203	3.50957	0.000448825	0.00727466	Q4HXT6
TCONS_00013448	3814.47	0.356562	0.0714738	4.98871	6.07853e-07	2.21352e-05	Q9DE27
TCONS_00014787	3812.58	0.329412	0.0710565	4.63592	3.55355e-06	0.000112232	A0A0H5RIS6
TCONS_00008670	3808.77	-0.142035	0.0856243	-1.65882	0.0971521	0.344557	Q9U7D0
TCONS_00002161	3805.3	0.0917695	0.0792686	1.1577	0.246985	0.56562	Q8BKX6
TCONS_00003611	3793.02	-0.0456277	0.0706647	-0.645693	0.518478	0.787586	Q7ZVZ7
TCONS_00000678	3790.28	0.202793	0.0737187	2.75091	0.00594301	0.0557021	Q54I86
TCONS_00001594	3790.03	0.0902093	0.0611425	1.47539	0.140106	0.425022	Q4P553
TCONS_00000231	3785.96	0.125991	0.0586572	2.14792	0.0317199	0.175521	A0NGI1
TCONS_00010921	3784.1	-0.0349962	0.059886	-0.584381	0.558964	0.807248	P53697
TCONS_00014187	3783.56	-0.0142748	0.0627872	-0.227353	0.82015	0.936705	Q9BZV1
TCONS_00006574	3782.59	0.110319	0.0592753	1.86113	0.0627254	0.272468	A0A0H5RF66
TCONS_00011106	3780.16	0.165242	0.08851	1.86693	0.061911	0.269481	Q8LFJ5
TCONS_00002551	3778.97	-0.0107785	0.0664609	-0.162178	0.871166	0.954241	P09189
TCONS_00009314	3777.58	-0.0865819	0.0661885	-1.30811	0.190836	0.500878	A0A0H5R8V0
TCONS_00006520	3776.4	0.0660859	0.0634376	1.04175	0.297529	0.618342	Q9P2E3
TCONS_00005365	3774.68	0.212258	0.0673734	3.15046	0.00163012	0.0208106	A0A0H5R9Z4
TCONS_00000856	3769.79	0.0323591	0.0587787	0.550524	0.58196	0.81836	P00388
TCONS_00005628	3767.7	0.0788937	0.0671355	1.17514	0.239938	0.557901	O80642
TCONS_00006386	3765.58	0.121902	0.0619855	1.96662	0.049227	0.234656	Q6CM45
TCONS_00003309	3747.17	-0.212797	0.0606749	-3.50716	0.000452916	0.00730806	Q8ZWC4
TCONS_00004720	3742.32	0.0562811	0.0711616	0.790892	0.429007	0.727087	Q5XIY6
TCONS_00007042	3740.68	0.0115408	0.0610094	0.189164	0.849964	0.949352	Q9JLH5
TCONS_00008410	3737.13	0.287878	0.0823594	3.49538	0.000473383	0.00752893	A0A0H5R8A2
TCONS_00010815	3731.25	-0.0129675	0.0715788	-0.181165	0.856238	0.950178	P34385
TCONS_00009709	3731.09	0.0878716	0.0582235	1.50921	0.131245	0.410039	A0A0R4IKJ1
TCONS_00010182	3727.4	0.00647027	0.0703968	0.0919115	0.926768	0.974135	A0A0H5QFU0
TCONS_00010453	3726.95	0.0289842	0.0585814	0.494768	0.620764	0.839508	Q5ZI57
TCONS_00013967	3725.12	-0.12234	0.0815158	-1.50081	0.133405	0.413448	A0A0H5R826
TCONS_00003265	3710.53	0.0325751	0.0654935	0.49738	0.618921	0.8388	A0A0H5R6W2
TCONS_00008621	3702.86	0.0494668	0.0711423	0.695322	0.486854	0.768249	P0CR39
TCONS_00011120	3702.38	-0.00567502	0.0648438	-0.0875184	0.930259	0.976002	A0A0H5RC19
TCONS_00008214	3701.25	0.160978	0.0736028	2.18712	0.0287338	0.16394	Q9M322
TCONS_00011463	3701.13	-0.167465	0.0670207	-2.49871	0.0124646	0.0937766	Q24134
TCONS_00014303	3700.5	0.0833081	0.080024	1.04104	0.297857	0.618342	A0A0H5R1M4
TCONS_00000246	3694.53	-0.133166	0.0709701	-1.87637	0.0606049	0.26623	A0A0H5R0K2
TCONS_00011256	3687.96	0.165904	0.0608129	2.72811	0.00636983	0.0583886	P85977
TCONS_00004007	3687.02	0.0476582	0.0802463	0.593899	0.55258	0.803127	G2K3G6
TCONS_00006727	3685.33	-0.0219847	0.0628802	-0.349629	0.726617	0.895704	Q54TB7
TCONS_00004489	3684.94	0.0413517	0.0583998	0.708079	0.478896	0.763484	A0A0H5RA96
TCONS_00003699	3684.3	0.0861382	0.0603907	1.42635	0.153768	0.44402	P36037
TCONS_00008409	3681.53	0.0259452	0.0660997	0.392517	0.694676	0.881835	A0A0H5RQB9
TCONS_00000839	3678.12	0.184939	0.0645803	2.86371	0.00418712	0.0429938	Q7ZVX0
TCONS_00003219	3672.67	-0.198177	0.0687568	-2.88229	0.00394797	0.0414973	Q5ZJM3
TCONS_00011029	3672.43	-0.320702	0.0760958	-4.21445	2.5039e-05	0.000622611	A0A0H5RE48
TCONS_00007051	3668.79	0.124648	0.0645671	1.93052	0.0535429	0.245399	A1XQR9
TCONS_00007656	3662.03	0.0217449	0.0665491	0.326749	0.743857	0.905182	Q9SYH2
TCONS_00012863	3656.5	0.053705	0.0610081	0.880293	0.3787	0.688255	P24279
TCONS_00012935	3630.42	-0.0713356	0.0702301	-1.01574	0.309753	0.629711	A0A0H5QTG0
TCONS_00000917	3627.19	-0.107855	0.0661964	-1.62932	0.103244	0.358004	Q9YGY3
TCONS_00007895	3625.64	-0.107517	0.0729352	-1.47415	0.140441	0.425022	A0A0H5R7E9
TCONS_00006350	3623.34	-0.0184671	0.0593533	-0.311139	0.755695	0.910989	Q9USM7
TCONS_00003384	3620.85	0.0956094	0.0820636	1.16506	0.243993	0.562424	A0A0H5RPK4
TCONS_00007079	3587.74	0.0982354	0.0629777	1.55985	0.118796	0.389543	Q7XA87
TCONS_00000912	3587.66	0.0523076	0.0628071	0.832829	0.404941	0.707725	A0A0H5RA21
TCONS_00000225	3582.79	0.0803268	0.0682526	1.1769	0.239234	0.557292	A0A1D8PNZ7
TCONS_00011394	3582.09	-0.0769745	0.0798541	-0.963939	0.335077	0.651576	Q54CM0
TCONS_00005905	3579.73	-0.00570454	0.0772839	-0.0738128	0.941159	0.979086	A0A0H5R9K4
TCONS_00004637	3576.91	-0.154249	0.059152	-2.60767	0.00911603	0.074999	O94248
TCONS_00002775	3575.02	-0.0703789	0.0622831	-1.12998	0.258483	0.577218	A0A0H5QSE9
TCONS_00006009	3573.69	0.0993633	0.0656948	1.5125	0.130407	0.409023	Q338B9
TCONS_00009122	3569.13	-0.0046156	0.0603149	-0.0765252	0.939001	0.978806	G0S1B3
TCONS_00008445	3561.26	0.117906	0.0610739	1.93055	0.0535384	0.245399	Q9XJ61
TCONS_00010953	3557.54	-0.210451	0.0611619	-3.44088	0.000579823	0.00883119	A0A0H5RFH5
TCONS_00002785	3555.78	-0.0557624	0.0619103	-0.900696	0.36775	0.678028	Q94BQ2
TCONS_00004446	3555.56	-0.0433979	0.0769198	-0.564196	0.572621	0.814349	P11084
TCONS_00013840	3552.34	-0.146201	0.0758543	-1.92739	0.0539306	0.24616	Q8N0N3
TCONS_00012765	3549.67	0.00348231	0.0661214	0.0526653	0.957999	0.984138	Q55721
TCONS_00007381	3542.22	0.159476	0.0644326	2.47508	0.0133206	0.0978704	Q55BX7
TCONS_00000268	3541.7	-0.0371887	0.0605294	-0.614392	0.538957	0.799295	Q5R8Q7
TCONS_00006012	3540.06	0.0418296	0.0600485	0.696596	0.486055	0.768249	Q9Y7Q7
TCONS_00003293	3531.46	-0.185561	0.0895921	-2.07118	0.038342	0.198071	A0A0H5RDG3
TCONS_00004951	3531.34	0.081477	0.0679902	1.19836	0.230775	0.548778	Q5RE57
TCONS_00007231	3527.98	0.122342	0.0618137	1.9792	0.0477935	0.231438	Q945K7
TCONS_00008782	3526.06	-0.0119843	0.0734501	-0.163163	0.87039	0.954241	A0R5M8
TCONS_00005594	3523.39	-0.108464	0.138567	-0.782757	0.43377	0.729893	A0A0H5R2Q2
TCONS_00008793	3521.88	-0.00671909	0.0599715	-0.112038	0.910793	0.971435	A0A0H5R8X0
TCONS_00009316	3512.23	-0.124774	0.0624489	-1.99801	0.0457153	0.224666	A0A0H5R8V0
TCONS_00007920	3507.15	-0.188065	0.0625013	-3.00897	0.00262135	0.0300666	Q27705
TCONS_00005512	3506.11	0.14099	0.0655402	2.15121	0.03146	0.174708	Q8TGW7
TCONS_00008272	3484.27	-0.0905291	0.064415	-1.4054	0.159901	0.4546	Q01780
TCONS_00003848	3478.99	0.0571744	0.0603608	0.947212	0.343531	0.66069	O81024
TCONS_00005870	3476.01	-0.118203	0.0679185	-1.74036	0.0817956	0.312729	A0A0H5RR82
TCONS_00010096	3462.74	-0.131479	0.0667366	-1.97012	0.0488248	0.23387	A0A0H5R0P4
TCONS_00000087	3461.56	-0.0186912	0.0659141	-0.283569	0.776741	0.91956	A0A0H5RRJ0
TCONS_00005383	3460.77	0.171009	0.0949862	1.80035	0.0718051	0.291952	P28147
TCONS_00003098	3457.57	0.0853927	0.0684419	1.24767	0.212153	0.530901	Q9LIQ6
TCONS_00008873	3454.43	0.0699174	0.0825166	0.847313	0.396821	0.70149	Q7XUF4
TCONS_00007084	3449.13	0.0561523	0.0608905	0.922185	0.356432	0.670149	Q9LU46
TCONS_00009300	3446.69	0.113866	0.0624264	1.82401	0.0681511	0.284726	Q0VCN3
TCONS_00006105	3438.44	-0.0681541	0.0588637	-1.15783	0.246934	0.56562	Q9VE51
TCONS_00008248	3437.27	0.0182546	0.0747265	0.244286	0.807009	0.931693	B4JAX0
TCONS_00014791	3432.58	0.0110778	0.0596522	0.185706	0.852675	0.949352	A0A0H5R5R6
TCONS_00007374	3427.54	-0.283961	0.064847	-4.37894	1.19259e-05	0.000324385	Q96327
TCONS_00006777	3423.14	-0.0890824	0.0593714	-1.50043	0.133504	0.413448	Q3UJK4
TCONS_00001931	3420.81	0.0548562	0.0702871	0.780459	0.435121	0.731126	Q75LL6
TCONS_00000328	3411.66	0.0526054	0.0589315	0.892653	0.372043	0.681687	P22893
TCONS_00004796	3410.03	0.0714404	0.0827694	0.863125	0.388069	0.695545	A0A0H5R8Z9
TCONS_00006671	3408.84	0.177839	0.0680054	2.61507	0.00892086	0.0741824	Q28824
TCONS_00011675	3407.96	-0.140975	0.0722008	-1.95255	0.0508735	0.239898	A0A0H5R9J7
TCONS_00013115	3403.26	0.147683	0.0759186	1.94528	0.0517408	0.241506	Q8R123
TCONS_00000964	3393.54	0.0304195	0.0628289	0.484165	0.628269	0.843236	A0A0R4I9Y1
TCONS_00003990	3377.95	-0.0503251	0.0617387	-0.815131	0.414997	0.716276	A0A0H5R9B2
TCONS_00001433	3375.89	-0.00550187	0.0622588	-0.088371	0.929582	0.975586	A0A0H5R9N2
TCONS_00009059	3374.49	-0.0171519	0.077925	-0.220108	0.825787	0.939718	A0A0H5R806
TCONS_00003845	3365.53	0.0350353	0.0649028	0.539811	0.589327	0.822052	Q9D8V7
TCONS_00010065	3358.68	-0.0250027	0.0672334	-0.371879	0.709983	0.888178	Q7KWX9
TCONS_00011013	3354.46	0.0966363	0.0624932	1.54635	0.12202	0.395305	A7TJ59
TCONS_00006708	3351.86	0.0200511	0.059961	0.334402	0.738076	0.902529	Q99807
TCONS_00008991	3336.93	-0.00163957	0.0620222	-0.0264352	0.97891	0.991859	P26818
TCONS_00006428	3323.08	-0.0303586	0.0723071	-0.419857	0.67459	0.86953	A0A0H5R3E4
TCONS_00013139	3320.46	0.0479027	0.0731346	0.654994	0.512471	0.784079	Q80TC5
TCONS_00005315	3316.03	0.0665898	0.0600032	1.10977	0.267098	0.584784	A0A0H5R7F9
TCONS_00008376	3307.64	0.177718	0.0755765	2.35151	0.0186976	0.12409	Q6QNM1
TCONS_00006117	3301.89	0.0228785	0.0648743	0.352658	0.724344	0.89406	P49696
TCONS_00001134	3301.36	0.0206952	0.0736408	0.281029	0.778688	0.919664	Q99LX5
TCONS_00011680	3295.13	-0.0219548	0.0766309	-0.286501	0.774494	0.918662	A0A0H5R4W9
TCONS_00012505	3292.88	0.342157	0.0677438	5.05074	4.40098e-07	1.65696e-05	Q6P158
TCONS_00009501	3289.18	-0.158707	0.0660316	-2.40351	0.0162387	0.112024	A0A0H5QZT0
TCONS_00005841	3284.75	-0.144386	0.0679847	-2.12381	0.0336863	0.182999	Q9SEI4
TCONS_00013242	3280.05	-0.00396186	0.0681287	-0.0581527	0.953627	0.981918	A0A0H5RC66
TCONS_00004617	3273.67	0.192604	0.0689045	2.79523	0.00518635	0.0507516	O60942
TCONS_00000950	3271.01	-0.0260335	0.0590221	-0.441081	0.659155	0.860404	D0NLC2
TCONS_00008350	3270.04	-0.141731	0.0727085	-1.9493	0.0512591	0.240726	Q9MBF8
TCONS_00005871	3243.34	0.0270395	0.0636782	0.424627	0.671109	0.868063	B2LXS7
TCONS_00012631	3240.75	0.129303	0.0670742	1.92775	0.0538859	0.246124	Q96BZ9
TCONS_00012822	3228.99	0.00218552	0.0667887	0.032723	0.973896	0.990726	Q9CQQ8
TCONS_00008033	3228.12	-0.443164	0.0652504	-6.79174	1.10786e-11	8.38952e-10	P43098
TCONS_00010503	3226.43	0.00865771	0.0670511	0.129121	0.897262	0.96597	Q92797
TCONS_00005384	3221.53	-0.0193638	0.0597267	-0.324207	0.745781	0.906252	Q3ZC89
TCONS_00001483	3219.42	0.10309	0.0674493	1.52841	0.126411	0.403112	A0A0H5R1U4
TCONS_00002274	3208.65	0.000450231	0.0784533	0.00573884	0.995421	0.998418	Q9LIC2
TCONS_00000111	3206.85	0.236147	0.0660653	3.57445	0.000350967	0.00596644	Q0WMV8
TCONS_00008435	3203.52	-0.110601	0.0771972	-1.43271	0.15194	0.441574	A0A0H5QIA7
TCONS_00005727	3197.39	-0.191673	0.0642557	-2.98297	0.00285464	0.0321883	Q3UMC0
TCONS_00002703	3193.46	-0.0897523	0.0735287	-1.22064	0.222221	0.54059	Q96FX7
TCONS_00001408	3193.25	0.110404	0.0612535	1.80241	0.0714802	0.291164	A0A0H5R997
TCONS_00008576	3184.51	0.090276	0.0672255	1.34288	0.179309	0.486088	A0A0H5R7R4
TCONS_00008484	3183.89	-0.228312	0.06783	-3.36594	0.000762831	0.0109323	Q8IV35
TCONS_00013553	3178.6	-0.262354	0.0753367	-3.48241	0.000496918	0.00781005	Q47690
TCONS_00005907	3171.97	0.136065	0.0664566	2.04742	0.0406164	0.206345	P10401
TCONS_00009835	3170.55	-0.0242995	0.0602758	-0.403139	0.686846	0.877567	P08629
TCONS_00001274	3169.31	-0.038877	0.0691504	-0.562209	0.573973	0.814529	P26639
TCONS_00001310	3168.8	0.105534	0.065655	1.60741	0.107965	0.367457	Q86L04
TCONS_00005016	3150.18	0.190191	0.0656356	2.89768	0.00375929	0.0398916	A0A0H5R8Z6
TCONS_00003343	3142.57	0.105766	0.0916362	1.1542	0.248419	0.566552	P35130
TCONS_00004231	3140.57	0.137813	0.0615569	2.2388	0.0251692	0.150508	A0A0H5R4A9
TCONS_00009891	3134.52	0.0776081	0.0628536	1.23474	0.216926	0.534631	A0A0H5RNC4
TCONS_00002829	3124.14	0.235596	0.0652387	3.61129	0.000304673	0.00524722	G0S381
TCONS_00000376	3122.03	-0.00791813	0.0837649	-0.0945281	0.92469	0.974135	A0A0H5RBC6
TCONS_00011635	3114.54	-0.0987637	0.0681332	-1.44957	0.147179	0.434559	A0A0H5RC96
TCONS_00002301	3110.22	0.038087	0.0611209	0.623142	0.533191	0.794186	Q9VNA0
TCONS_00004022	3109.18	-0.0663925	0.0625769	-1.06097	0.288702	0.609797	Q5NQ64
TCONS_00002216	3104.73	0.0254876	0.0604967	0.421306	0.673532	0.869072	P49076
TCONS_00000822	3102.46	-0.000662961	0.0741909	-0.00893587	0.99287	0.99706	Q7Z4T9
TCONS_00001311	3096.6	-0.218298	0.0688067	-3.17262	0.0015107	0.0196244	A0A0H5QQ33
TCONS_00001374	3093.22	0.0613011	0.0604061	1.01482	0.310194	0.630415	A0A0H5RCD1
TCONS_00006013	3090.62	0.113924	0.0627817	1.81461	0.0695845	0.287119	Q8BL48
TCONS_00008112	3088.79	-0.00241058	0.0761349	-0.0316619	0.974742	0.990799	Q9CQP2
TCONS_00000623	3077.95	0.00220601	0.0682731	0.0323115	0.974224	0.990726	O66921
TCONS_00000818	3074.52	0.104639	0.0619394	1.68937	0.091148	0.3334	A0A0H5QNV1
TCONS_00000156	3070.28	0.274637	0.0680015	4.03869	5.37496e-05	0.00120602	P97443
TCONS_00003714	3063.67	0.103263	0.0592458	1.74295	0.0813419	0.312205	Q9H3J6
TCONS_00000914	3054.75	-0.0915102	0.068924	-1.3277	0.184278	0.492	F4IG73
TCONS_00002030	3053.23	0.104421	0.0766258	1.36274	0.172964	0.478072	A0A0H5RP05
TCONS_00003483	3051.55	0.315136	0.0707534	4.454	8.42842e-06	0.000243147	Q04418
TCONS_00003594	3049.5	0.11613	0.0652487	1.7798	0.0751086	0.299177	A0A0H5QFT2
TCONS_00008573	3045.62	0.0832056	0.065366	1.27292	0.203046	0.518628	A0A0H5RES8
TCONS_00002166	3038.76	0.234773	0.0760494	3.08711	0.00202112	0.0244886	A0A0H5R979
TCONS_00011008	3036.14	0.0376947	0.0626106	0.60205	0.547141	0.801625	Q497B8
TCONS_00003585	3033.2	-0.0869792	0.0702754	-1.23769	0.215831	0.533494	Q5R5M8
TCONS_00007138	3022.76	0.107623	0.062152	1.7316	0.0833445	0.315932	O14023
TCONS_00013659	3022.16	0.010217	0.140017	0.0729699	0.94183	0.979086	A0A0H5QLK9
TCONS_00006793	3019.08	-0.0119341	0.0628652	-0.189836	0.849438	0.949352	P15621
TCONS_00007524	3017.91	-0.0313608	0.0612775	-0.511783	0.608803	0.834225	Q54CS2
TCONS_00006318	3012.82	0.214115	0.0660623	3.24111	0.00119065	0.0159327	Q9H7Z3
TCONS_00005874	3002.98	0.112433	0.0696773	1.61363	0.106608	0.364513	O64644
TCONS_00011491	3002.3	0.0542262	0.06997	0.774992	0.438344	0.732719	Q9LSP7
TCONS_00014221	3001.46	0.283696	0.0645679	4.39376	1.11408e-05	0.000308059	A0A0H5R5T3
TCONS_00012674	3001.22	0.0393917	0.0720739	0.546546	0.584691	0.819255	Q9FNE2
TCONS_00002999	2995.24	0.109255	0.0701032	1.55849	0.119117	0.390072	A0A0H5RBB5
TCONS_00003574	2993.78	0.0883617	0.0794861	1.11166	0.266284	0.584298	Q7XKC8
TCONS_00003827	2984.91	0.0152389	0.0628026	0.242648	0.808278	0.931736	Q91YJ3
TCONS_00008230	2976.43	-0.0105301	0.065003	-0.161994	0.87131	0.954241	Q96H20
TCONS_00008732	2970.17	0.0163566	0.0766306	0.213448	0.830978	0.941295	O74343
TCONS_00013534	2968.7	0.114905	0.0731091	1.57169	0.116021	0.383795	Q757J8
TCONS_00002924	2968.64	0.0217882	0.0759249	0.28697	0.774135	0.918662	A0A0H5QZL2
TCONS_00014804	2968.62	-0.0853461	0.0778608	-1.09614	0.273019	0.589756	A0A0H5R937
TCONS_00001701	2959.23	-0.130069	0.0652201	-1.99431	0.0461183	0.225742	Q6IR75
TCONS_00014745	2955.16	-0.00309392	0.0614356	-0.0503604	0.959835	0.985417	A0A0H5R1U8
TCONS_00004656	2944.98	0.0232204	0.0647776	0.358463	0.719997	0.891022	P61801
TCONS_00002709	2943.79	0.0849124	0.0684698	1.24014	0.214922	0.533119	Q91XA9
TCONS_00000394	2942.86	-0.158497	0.0758099	-2.09072	0.0365535	0.192411	A0A0H5QVP0
TCONS_00001407	2941.75	0.0389793	0.0704713	0.553124	0.580179	0.817986	Q9NRW7
TCONS_00006317	2936.82	0.145288	0.0736654	1.97227	0.0485784	0.233557	Q62203
TCONS_00001589	2934.14	0.184903	0.0686733	2.6925	0.00709175	0.062845	O00400
TCONS_00008358	2929.38	0.0818802	0.0704519	1.16222	0.245148	0.56399	O04035
TCONS_00009706	2928.03	-0.129122	0.0735864	-1.7547	0.0793111	0.30872	A0A0H5R0R7
TCONS_00000018	2927.84	-0.0379157	0.068873	-0.550516	0.581966	0.81836	A0A0H5RF94
TCONS_00010478	2926.75	-1.4748	0.0725469	-20.329	7.12784e-92	5.93749e-89	A0A0H5RB43
TCONS_00000064	2925.13	0.165492	0.0603618	2.74167	0.00611284	0.0566565	X1WER2
TCONS_00001920	2909.65	-0.0226286	0.0620875	-0.364462	0.715513	0.889498	Q8BZZ3
TCONS_00002454	2905.51	-0.0151536	0.0806107	-0.187985	0.850888	0.949352	Q5EAY8
TCONS_00011884	2899.01	-0.0523397	0.0648812	-0.8067	0.419839	0.720795	O82225
TCONS_00008932	2890.69	0.17257	0.0780282	2.21163	0.0269922	0.15655	Q5NVI3
TCONS_00012457	2887.77	-0.0638284	0.0935015	-0.682646	0.494831	0.77121	A0A0H5R5A5
TCONS_00002734	2884.12	0.0702263	0.0659457	1.06491	0.286916	0.607373	Q54VA8
TCONS_00008491	2879.06	0.139898	0.0619475	2.25834	0.0239245	0.146538	A0A0H5RQ15
TCONS_00002181	2873.07	0.085336	0.0700597	1.21805	0.223206	0.541276	Q8LPJ4
TCONS_00011907	2869.06	0.296858	0.0751526	3.95007	7.81276e-05	0.0016581	O75643
TCONS_00000570	2868.72	0.00979872	0.0705509	0.138889	0.889538	0.963381	O74857
TCONS_00006646	2863.48	-0.160793	0.069888	-2.30072	0.0214074	0.136255	Q32MW3
TCONS_00014118	2861.49	0.0469229	0.0620915	0.755706	0.449825	0.742541	A0A0H5R745
TCONS_00009221	2858.96	-0.0595119	0.0749997	-0.793496	0.427489	0.725251	Q8VE37
TCONS_00004082	2857.92	-0.261089	0.0646396	-4.03915	5.36447e-05	0.00120602	A0A0H5R832
TCONS_00004562	2856.44	-0.0314447	0.064259	-0.489344	0.624598	0.841711	Q9SK39
TCONS_00009462	2853.9	-0.107315	0.0690024	-1.55524	0.119889	0.391445	A0A0H5QEV2
TCONS_00010689	2851.89	-0.0681065	0.0680978	-1.00013	0.317248	0.634903	H9JAQ7
TCONS_00011610	2851	-0.193116	0.0698943	-2.76297	0.00572775	0.0542955	A0A0H5QJ21
TCONS_00012613	2835.68	-0.41001	0.0728282	-5.62983	1.8039e-08	8.93782e-07	A0A0H5QUJ7
TCONS_00000071	2833.96	0.0398061	0.0687032	0.579393	0.562324	0.809022	Q8WQI5
TCONS_00003127	2832.53	0.0466509	0.0641276	0.72747	0.466938	0.755554	Q8KCD5
TCONS_00011009	2830.48	-0.0288894	0.0755258	-0.382511	0.702082	0.884737	P87303
TCONS_00005605	2826.87	0.106862	0.0632639	1.68915	0.091191	0.3334	O70475
TCONS_00001740	2825.94	-0.153414	0.131467	-1.16694	0.243235	0.561779	Q5BK62
TCONS_00014085	2825.14	-0.24238	0.0800187	-3.02904	0.00245335	0.0285824	A0A0H5QV33
TCONS_00006152	2807.41	-0.0383422	0.060843	-0.630183	0.528575	0.792002	A0A0H5QX94
TCONS_00010898	2803.14	-0.0191293	0.0624111	-0.306505	0.75922	0.912017	P38975
TCONS_00012780	2800.49	0.104779	0.0875569	1.1967	0.231424	0.548778	O74503
TCONS_00008635	2799.77	-0.136159	0.0775589	-1.75556	0.0791632	0.308505	Q5RK30
TCONS_00007426	2797.33	-0.139355	0.0683415	-2.03909	0.0414406	0.209371	Q8TAT6
TCONS_00003018	2792.65	0.0551706	0.063734	0.865638	0.386689	0.694743	Q9Y333
TCONS_00009308	2788.02	0.208514	0.0662729	3.1463	0.00165352	0.0210051	O22932
TCONS_00010801	2780.02	-0.0639089	0.0660523	-0.967549	0.333269	0.649765	A0A0H5RA65
TCONS_00000652	2778	-0.302438	0.0706554	-4.28047	1.86501e-05	0.000483597	A0A0H5R3S0
TCONS_00003722	2776.53	-0.0380367	0.0632268	-0.601592	0.547446	0.801625	Q9USQ7
TCONS_00005306	2771.43	0.232907	0.0948875	2.45456	0.0141057	0.101999	O49636
TCONS_00010966	2768.02	0.0712928	0.0758979	0.939326	0.347564	0.663957	Q9CRB3
TCONS_00008530	2765.25	0.242976	0.0777926	3.12338	0.00178789	0.0223957	A0A0H5QHE9
TCONS_00002515	2760.91	0.292004	0.0667781	4.37276	1.22688e-05	0.000331008	O14036
TCONS_00001978	2757.59	0.0593039	0.0675605	0.877789	0.380058	0.68936	A0A0H5R0S7
TCONS_00005809	2752.85	0.0403138	0.0657358	0.61327	0.539698	0.799295	Q9FIV6
TCONS_00011073	2751.79	0.00600751	0.0736639	0.081553	0.935002	0.977389	A0A0H5RAR4
TCONS_00007307	2746.1	0.214519	0.063279	3.39005	0.00069879	0.0101898	Q5BK18
TCONS_00014105	2743.61	-0.276782	0.0754434	-3.66874	0.000243747	0.0044871	A0A0H5QMK0
TCONS_00011040	2742.93	0.0462273	0.0798868	0.57866	0.562819	0.809022	A0A0H5QZP1
TCONS_00010484	2742.69	-1.60369	0.0747014	-21.468	3.10273e-102	2.9538e-99	A0A0H5RB43
TCONS_00003111	2742.39	0.0394408	0.0839698	0.469702	0.638568	0.850137	Q291L9
TCONS_00013547	2735.74	0.119618	0.073429	1.62903	0.103308	0.358004	A0A0H5QXJ5
TCONS_00006887	2734.86	0.0237247	0.0717994	0.33043	0.741075	0.903995	A0A0H5R533
TCONS_00009926	2728.99	0.105642	0.0674155	1.56703	0.117108	0.386148	P14325
TCONS_00004081	2726.93	0.091445	0.0747099	1.224	0.220952	0.539539	Q5U236
TCONS_00013026	2725.26	0.0469292	0.0744991	0.629931	0.52874	0.792002	A0A0H5R3S5
TCONS_00003289	2723.67	-0.0158697	0.0849849	-0.186736	0.851868	0.949352	P87173
TCONS_00007007	2712.14	-0.208805	0.0660199	-3.16277	0.00156278	0.0201438	Q93ZX1
TCONS_00003008	2710.03	0.0938532	0.0668105	1.40477	0.160091	0.45475	A0A0H5R5F1
TCONS_00005895	2703.54	0.238604	0.06687	3.56817	0.000359482	0.00607871	Q5U236
TCONS_00003754	2702.27	-0.0238058	0.0699478	-0.340337	0.733603	0.90098	O02327
TCONS_00013171	2697.29	-0.303765	0.0730014	-4.16108	3.16741e-05	0.000762007	A0A0H5QRC9
TCONS_00012165	2695.48	0.00664369	0.0625319	0.106245	0.915388	0.973189	P33188
TCONS_00013783	2695.02	-0.0394544	0.0655619	-0.601789	0.547315	0.801625	P26269
TCONS_00011541	2691.69	-0.166534	0.0894926	-1.86087	0.0627622	0.272468	Q83MI1
TCONS_00014393	2679.76	0.0202347	0.0771445	0.262296	0.793094	0.924742	A0A0H5RLX3
TCONS_00007905	2673.12	-0.167456	0.0694614	-2.41078	0.0159186	0.110272	P97739
TCONS_00009465	2672.15	-0.192509	0.0815196	-2.36151	0.0182007	0.121899	A0A0H5QXW6
TCONS_00010153	2661.68	-0.0328456	0.0633869	-0.518177	0.604335	0.8327	Q9FIK7
TCONS_00000474	2658.14	0.183897	0.067977	2.70529	0.00682454	0.0609634	Q3SZK1
TCONS_00001114	2655.39	-0.0508554	0.0632293	-0.804302	0.421222	0.721486	Q92504
TCONS_00011665	2645.54	0.0896458	0.0706959	1.26805	0.204781	0.520862	O64628
TCONS_00006685	2642.79	-0.0422484	0.0673852	-0.626968	0.53068	0.792394	A4RUK2
TCONS_00002626	2640	0.0579827	0.0676099	0.857606	0.39111	0.698395	Q8GWT4
TCONS_00010888	2638.7	0.107579	0.0694761	1.54843	0.121519	0.394255	F1QMV3
TCONS_00009708	2635.96	-0.110423	0.0744518	-1.48315	0.138036	0.421571	A0A0H5R0R7
TCONS_00009769	2635.31	0.151923	0.0779052	1.9501	0.0511636	0.240617	P53803
TCONS_00000892	2614.58	0.250192	0.0646647	3.86907	0.000109249	0.0021863	Q6CSA2
TCONS_00001211	2610.84	0.0512663	0.0692069	0.740769	0.458834	0.750532	A0A0H5QNJ5
TCONS_00009795	2605.09	0.0948391	0.0660977	1.43483	0.151335	0.440777	A0A0H5RAK7
TCONS_00009874	2604.79	0.193437	0.0628116	3.07964	0.00207253	0.0250206	Q8R173
TCONS_00005458	2599.47	0.0427272	0.0654523	0.652799	0.513886	0.784544	Q54IK2
TCONS_00001927	2596.62	0.10135	0.0663614	1.52724	0.126702	0.403468	Q54UI3
TCONS_00014222	2587.4	0.129928	0.080587	1.61227	0.106902	0.364988	Q6IQE9
TCONS_00014715	2585.59	0.341437	0.064621	5.28369	1.26607e-07	5.33992e-06	A0A0H5QWU9
TCONS_00006536	2584.04	0.327127	0.0663401	4.93106	8.17846e-07	2.8729e-05	Q556Z0
TCONS_00005373	2569.18	0.127643	0.0728222	1.75281	0.0796355	0.308936	A0A0H5QI69
TCONS_00002983	2568.09	-0.351847	0.0685731	-5.13097	2.88249e-07	1.10948e-05	Q9Z2X3
TCONS_00001564	2563.92	0.0541673	0.0639301	0.847289	0.396834	0.70149	Q8S8T4
TCONS_00003387	2562.3	0.0805605	0.0669667	1.20299	0.228979	0.546465	Q8N6T7
TCONS_00006019	2561.33	0.188989	0.132686	1.42433	0.154351	0.444511	P63281
TCONS_00011048	2560.74	0.147265	0.0702617	2.09595	0.0360863	0.190554	Q9XFD1
TCONS_00012477	2552.83	-0.0244744	0.0725409	-0.337388	0.735825	0.902215	A7S6Y0
TCONS_00011603	2549.9	-0.0051265	0.0639012	-0.0802255	0.936058	0.977879	A0A0H5R7V4
TCONS_00005105	2544.79	-0.0627246	0.0633812	-0.98964	0.32235	0.641153	A0A0H5QIR8
TCONS_00002268	2540.06	0.0521719	0.0683756	0.76302	0.445451	0.739334	A0A0H5QJS6
TCONS_00002405	2535.02	-0.0286125	0.0658962	-0.434205	0.66414	0.863239	A0A0H5QVW5
TCONS_00009253	2534.32	0.0933828	0.082088	1.13759	0.25529	0.572599	A0A0H5R4P9
TCONS_00008481	2533.01	-0.216366	0.0695974	-3.10883	0.00187833	0.0231371	Q9D565
TCONS_00007828	2529.07	0.0962903	0.0700549	1.3745	0.169287	0.47175	Q9LD90
TCONS_00012787	2526.55	-0.0816619	0.0689396	-1.18454	0.236198	0.554625	P10401
TCONS_00006176	2517.86	0.200325	0.0729969	2.74429	0.00606423	0.0563627	D3Z5L6
TCONS_00013254	2517.69	0.0665887	0.0786418	0.846734	0.397143	0.70149	A0A0H5R5P0
TCONS_00005560	2516.99	0.161096	0.0644742	2.49862	0.0124679	0.0937766	Q949R9
TCONS_00007630	2509.21	0.137825	0.0728146	1.89282	0.0583824	0.259893	A0A0H5R4D3
TCONS_00001140	2506.2	-0.0232509	0.0645269	-0.360328	0.718602	0.890436	A0A0H5QGH6
TCONS_00004109	2504.42	-0.47676	0.0715614	-6.66225	2.69672e-11	1.9118e-09	A0A0H5RCA7
TCONS_00008729	2502.57	0.211366	0.0707339	2.98818	0.00280645	0.0317529	Q54CN8
TCONS_00010047	2500.55	0.0863966	0.0708912	1.21872	0.22295	0.541276	A0A0H5QPT0
TCONS_00007661	2499.38	-0.147793	0.0785453	-1.88162	0.0598872	0.264647	A0A0H5QLQ6
TCONS_00010492	2495.01	0.11292	0.0708314	1.59421	0.110889	0.373593	A0A0H5RQ87
TCONS_00012367	2492.88	0.00336976	0.0928025	0.0363111	0.971034	0.990628	A0A0H5QJX5
TCONS_00011532	2492.17	0.00529575	0.0763957	0.06932	0.944735	0.979295	Q74CT2
TCONS_00009640	2492.08	-0.222404	0.068038	-3.26883	0.00107995	0.0146826	Q642R9
TCONS_00008341	2487.68	-0.0614075	0.0780807	-0.786462	0.431597	0.728696	A0A0H5R487
TCONS_00000801	2486.19	-0.110541	0.0685304	-1.61303	0.106739	0.364774	O49606
TCONS_00001760	2483.83	-0.157314	0.133722	-1.17643	0.239425	0.557292	Q5BK62
TCONS_00007091	2482	-0.226679	0.0714943	-3.17059	0.0015213	0.0197237	P34092
TCONS_00010594	2480.45	0.106916	0.0652102	1.63955	0.101098	0.353657	O23714
TCONS_00002870	2479.12	-0.101014	0.0695541	-1.45231	0.146414	0.434226	Q80UW8
TCONS_00008746	2477.94	-0.0306939	0.0729393	-0.420815	0.67389	0.869072	Q8I1F4
TCONS_00009846	2477.26	-0.0469694	0.0674996	-0.695848	0.486524	0.768249	A0A0H5R8K0
TCONS_00005981	2475.86	0.136784	0.0911807	1.50015	0.133577	0.413448	A0A0H5QGY9
TCONS_00014123	2469.3	-0.488712	0.0720449	-6.78344	1.17344e-11	8.78629e-10	A0A0H5RV65
TCONS_00008477	2467.9	0.0167753	0.0726594	0.230875	0.817412	0.936229	A0A0H5QHR7
TCONS_00000670	2465.59	0.019253	0.069117	0.278556	0.780585	0.919951	A0A0H5RPJ9
TCONS_00004771	2458.64	0.100562	0.0835831	1.20314	0.228921	0.546465	Q9ZV56
TCONS_00001654	2457.58	0.0241708	0.0672337	0.359504	0.719218	0.890703	Q9ZVN9
TCONS_00007102	2451.97	-0.0509914	0.068987	-0.739145	0.459819	0.7513	A0A0H5RNL8
TCONS_00009428	2442.41	0.218182	0.0900282	2.42348	0.0153724	0.107494	A0A1S4D1D3
TCONS_00009130	2442.33	-0.0696656	0.0662927	-1.05088	0.293314	0.615055	Q5PQ50
TCONS_00002043	2439.83	0.174818	0.0672024	2.60137	0.00928533	0.0762037	P32856
TCONS_00002218	2434.79	-0.433437	0.067128	-6.45688	1.06882e-10	7.19456e-09	A0A0H5QJB6
TCONS_00000380	2434.62	0.141502	0.08828	1.60287	0.108963	0.36953	Q9SE94
TCONS_00003026	2431.79	-0.0156705	0.0814553	-0.192382	0.847443	0.948782	Q8VZ67
TCONS_00002717	2428.7	0.0516946	0.0759886	0.680294	0.496318	0.772051	A0A0H5QTD5
TCONS_00009373	2427.05	0.0503246	0.0684528	0.735172	0.462235	0.752701	Q86A21
TCONS_00001356	2425.49	0.0941339	0.0650666	1.44673	0.147972	0.435551	A0A0H5QHR0
TCONS_00005630	2423.49	0.238965	0.0681596	3.50596	0.000454955	0.00732324	A0A0H5RFA0
TCONS_00000040	2420.6	0.1483	0.0788332	1.88119	0.0599456	0.26473	P26374
TCONS_00014868	2420.57	0.155102	0.074045	2.09469	0.0361982	0.190842	A0A0H5RDV1
TCONS_00012176	2411.66	-0.125713	0.0651365	-1.92999	0.0536081	0.245529	P38562
TCONS_00000593	2411.09	-0.0130285	0.0667079	-0.195306	0.845153	0.947208	Q8H329
TCONS_00005482	2410.93	0.10336	0.0720798	1.43396	0.151583	0.441101	Q0P593
TCONS_00011372	2410.27	-0.0146062	0.0688288	-0.21221	0.831943	0.941908	P31410
TCONS_00004267	2410.16	0.0250452	0.0748129	0.334772	0.737797	0.902529	Q5RBB1
TCONS_00006674	2409.61	0.30234	0.0719548	4.20181	2.64793e-05	0.000648744	A3KPP3
TCONS_00003448	2407.38	0.0414007	0.0687434	0.602251	0.547007	0.801625	Q6BPT6
TCONS_00007003	2406.58	-0.169605	0.0685821	-2.47302	0.0133977	0.0982205	Q09843
TCONS_00011373	2404.8	-0.0273673	0.0702139	-0.38977	0.696707	0.88228	Q9KSB2
TCONS_00009585	2403.61	-0.183624	0.0650344	-2.82349	0.00475042	0.0473588	Q23917
TCONS_00003476	2402.06	0.0326568	0.0692096	0.471854	0.637031	0.848858	P11076
TCONS_00008349	2395.6	-0.0492814	0.0753117	-0.654365	0.512876	0.784261	A0A0H5R487
TCONS_00004192	2394.35	-0.0172062	0.0708368	-0.242899	0.808084	0.931707	Q6NRP2
TCONS_00010899	2393.29	0.113897	0.0890273	1.27935	0.200773	0.514597	Q55DE7
TCONS_00010421	2388.94	-0.00385456	0.0684412	-0.0563193	0.955087	0.982561	A0A0H5QRI2
[truncated: 3,987 more rows]

## Sheet: Significant Transcripts
GeneID	Base mean	log2(FC)	StdErr	Wald-Stats	P-value	P-adj
[truncated: 679 more rows]

## Sheet: Annotated DEGs
GeneID	Base mean	log2(FC)	StdErr	Wald-Stats	P-value	P-adj	Annotation	Protein name
[truncated: 570 more rows]
