# Supplementary material for: Spore Germination of the Obligate Biotroph Spongospora subterranea: Transcriptome Analysis Reveals Germination Associated Genes
Source: Front Microbiol. 2021 Jun 16;12:691877. doi: 10.3389/fmicb.2021.691877 (PMC8256667; doi:10.3389/fmicb.2021.691877)
Supplement: Supplementary file 3 [file Table_3.XLSX]

## Sheet: Biological Processes
Category	Term	Count	%	P-Value
BP	Cellular metabolic process	38	16	8.4e-05
BP	Protein metabolic process	24	10.1	0.00013
BP	Regulation of cellular protein metabolic process	8	3.4	9e-05
BP	Regulation of protein metabolic process	8	3.4	0.00015
BP	Cellular protein modification process	16	6.8	0.00028
BP	Protein modification process	16	6.8	0.00028
BP	Macromolecule modification	17	7.2	0.00038
BP	Organic substance metabolic process	38	16	0.00053
BP	Regulation of kinase activity	4	1.7	0.00056
BP	Primary metabolic process	36	15.2	0.00084
BP	Macromolecule metabolic process	32	13.5	0.00086
BP	Regulation of phosphorylation	4	1.7	0.00074
BP	Cellular protein metabolic process	21	8.9	0.0011
BP	Regulation of transferase activity	4	1.7	0.0013
BP	Cellular macromolecule metabolic process	30	12.7	0.0015
BP	Regulation of phosphate metabolic process	4	1.7	0.0024
BP	Regulation of phosphorus metabolic process	4	1.7	0.0024
BP	Phosphorylation	10	4.2	0.0039
BP	Regulation of protein modification process	4	1.7	0.0048
BP	Metabolic process	38	16	0.0083
BP	Regulation of protein kinase activity	3	1.3	0.011
BP	Phosphate-containing compound metabolic process	11	4.6	0.012
BP	Phosphorus metabolic process	11	4.6	0.013
BP	Regulation of protein phosphorylation	3	1.3	0.012
BP	Response to stimulus	23	9.7	0.016
BP	Cellular process	40	16.9	0.017
BP	Positive regulation of biological process	7	3	0.018
BP	Regulation of translation	4	1.7	0.021
BP	Regulation of cellular amide metabolic process	4	1.7	0.022
BP	Response to chemical	13	5.5	0.023
BP	Proteolysis	8	3.4	0.025
BP	Positive regulation of cellular process	6	2.5	0.025
BP	Organelle organization	9	3.8	0.03
BP	Regulation of catalytic activity	4	1.7	0.031
BP	Response to abiotic stimulus	10	4.2	0.033
BP	Posttranscriptional regulation of gene expression	4	1.7	0.034
BP	Response to temperature stimulus	5	2.1	0.037
BP	RNA splicing	4	1.7	0.037
BP	Regulation of molecular function	4	1.7	0.041
BP	Cellular catabolic process	8	3.4	0.047
BP	DNA metabolic process	5	2.1	0.052
BP	Seedling development	3	1.3	0.053
BP	Response to inorganic substance	6	2.5	0.057
BP	mRNA processing	4	1.7	0.057
BP	Regulation of biological process	19	8	0.062
BP	Response to stress	14	5.9	0.062
BP	Histone modification	3	1.3	0.06
BP	Nitrogen compound metabolic process	21	8.9	0.094
BP	Cellular nitrogen compound metabolic process	20	8.4	0.087
BP	Regulation of primary metabolic process	12	5.1	0.087
BP	Catabolic process	9	3.8	0.08
BP	Macromolecular complex subunit organization	6	2.5	0.084
BP	Protein phosphorylation	6	2.5	0.099
BP	mRNA metabolic process	4	1.7	0.098
BP	mRNA splicing, via spliceosome	3	1.3	0.07
BP	RNA splicing, via transesterification reactions with bulged adenosine as nucleophile	3	1.3	0.08
BP	RNA splicing, via transesterification reactions	3	1.3	0.082
BP	Response to heat	3	1.3	0.083

## Sheet: Molecular Function
Category	Term	Count	%	P-Value
MF	Protein binding	16	6.8	0.008
MF	Protein kinase binding	3	1.3	0.0089
MF	Protein kinase regulator activity	3	1.3	0.0097
MF	Kinase regulator activity	3	1.3	0.01
MF	Kinase binding	3	1.3	0.012
MF	Metallopeptidase activity	3	1.3	0.019
MF	Macromolecular complex binding	4	1.7	0.032
MF	Transferase activity	16	6.8	0.035
MF	Binding	35	14.8	0.036
MF	Kinase activity	8	3.4	0.04
MF	Enzyme binding	4	1.7	0.055
MF	Phosphotransferase activity, alcohol group as acceptor	7	3	0.067
MF	Metalloexopeptidase activity	2	0.8	0.07
MF	Enzyme regulator activity	4	1.7	0.08
MF	Transferase activity, transferring phosphorus-containing groups	8	3.4	0.083
MF	Zinc ion binding	7	3	0.091
